# Supplementary material for: A metagenomic study of DNA viruses from samples of local varieties of common bean in Kenya
Source: PeerJ. 2019 Mar 15;7:e6465. doi: 10.7717/peerj.6465 (PMC6422016; doi:10.7717/peerj.6465)
Supplement: Supplemental Information 1 — Summary of the taxonomic profile of the DNA-Seq reads of the 12 bean samples using Kaiju (Menzel, Ng & Krogh, 2016) (raw data). [file peerj-07-6465-s001.xlsx]

## Sheet: Sheet1
	SRF001_SRR7264531			SRF002_SRR7264530			SRF006_SRR7264529			SRF008_SRR7264528			SRF013_SRR7264535			SRF019_SRR7264534			SRF020_SRR7264533			SRF021_SRR7264532			SRF022_SRR7264526			SRF025_SRR7264525			SRF027_SRR7264524			SRF035_SRR7264527
%	reads	genus	%	reads	genus	%	reads	genus	%	reads	genus	%	reads	genus	%	reads	genus	%	reads	genus	%	reads	genus	%	reads	genus	%	reads	genus	%	reads	genus	%	reads	genus
12.2524	7053	Streptomyces	3.75324	1288	Streptomyces	9.73316	8207	Streptomyces	9.18221	8603	Streptomyces	3.1801	3169	Streptomyces	6.39848	2820	Xanthomonas	1.64618	679	Streptomyces	5.31755	1770	Methylobacterium	3.43992	951	Streptomyces	5.24114	4422	0.780806	48041	Lactobacillus	Streptomyces	8.03129	1458	Pantoea
4.20054	2418	Bacillus	0.378821	130	Acetobacter	0.22296	188	Bacillus	1.93293	1811	Xanthomonas	1.76717	1761	Amycolatopsis	2.13963	943	Streptomyces	0.31275	129	Xanthomonas	2.49654	831	Microbacterium	0.419591	116	Microtetraspora	1.65815	1399	0.670514	41255	Methylobacterium	Methylobacterium	3.73471	678	Enterobacter
3.19297	1838	Methylobacterium	0.308885	106	Lactobacillus	0.199241	168	Clostridium	0.4312	404	Pseudomonas	0.268939	268	Clostridium	0.626234	276	Methylobacterium	0.242442	100	Acetobacter	1.9017	633	Streptomyces	0.264053	73	Acetobacter	0.427872	361	0.587672	36158	Acetobacter	Microtetraspora	1.38261	251	Herbaspirillum
0.237996	137	Microbacterium	0.236035	81	Pseudomonas	0.171964	145	Paenibacillus	0.244418	229	Bacillus	0.249872	249	Bacillus	0.28362	125	Acetobacter	0.240017	99	Pseudomonas	0.576819	192	Acetobacter	0.220647	61	Pseudomonas	0.258383	218	0.474796	29213	Acidihalobacter	Clostridium	0.826264	150	Bacillus
0.175457	101	Clostridium	0.201067	69	Bacillus	0.166034	140	Pseudomonas	0.23161	217	Clostridium	0.230806	230	Paenibacillus	0.254124	112	Lactobacillus	0.237593	98	Paenibacillus	0.375533	125	Lactobacillus	0.209795	58	Bacillus	0.252456	213	0.435805	26814	Streptomyces	Bacillus	0.572877	104	Methylobacterium
0.159822	92	Pseudomonas	0.198153	68	Clostridium	0.151803	128	Lactobacillus	0.225206	211	Microbacterium	0.229802	229	Pseudomonas	0.235972	104	Pseudomonas	0.218198	90	Clostridium	0.228324	76	Pseudomonas	0.202561	56	Lactobacillus	0.229937	194	0.291593	17941	Lactococcus	Pseudomonas	0.220337	40	Achromobacter
0.154611	89	Lactobacillus	0.192325	66	Paenibacillus	0.12334	104	Acetobacter	0.205994	193	Paenibacillus	0.198693	198	Lactobacillus	0.226896	100	Bacillus	0.213349	88	Microbacterium	0.210299	70	Bacillus	0.177241	49	Paenibacillus	0.212158	179	0.290098	17849	Pseudomonas	Paenibacillus	0.214829	39	Pseudomonas
0.147662	85	Acetobacter	0.151528	52	Mycobacterium	0.113852	96	Flavobacterium	0.17184	161	Lactobacillus	0.167585	167	Acetobacter	0.211014	93	Paenibacillus	0.2085	86	Bacillus	0.180256	60	Paenibacillus	0.173624	48	Clostridium	0.200306	169	0.23882	14694	Xanthomonas	Lactobacillus	0.214829	39	Xanthomonas
0.147662	85	Paenibacillus	0.128216	44	Corynebacterium	0.09962	84	Mycobacterium	0.140887	132	Acetobacter	0.14049	140	Streptococcus	0.179248	79	Clostridium	0.2085	86	Lactobacillus	0.159226	53	Clostridium	0.126601	35	Streptococcus	0.197935	167	0.160985	9905	Bavariicoccus	Acetobacter	0.17627	32	Novosphingobium
0.102495	59	Synechococcus	0.11656	40	Methylobacterium	0.098435	83	Streptococcus	0.134483	126	Streptococcus	0.13748	137	Flavobacterium	0.179248	79	Mycobacterium	0.133343	55	Mycobacterium	0.150213	50	Sphingomonas	0.115749	32	Mycobacterium	0.116154	98	0.131632	8099	Microbacterium	Streptococcus	0.170761	31	Streptomyces
0.100757	58	Streptococcus	0.11656	40	Desulfovibrio	0.093691	79	Leptospira	0.105665	99	Flavobacterium	0.118413	118	Mycobacterium	0.113448	50	Desulfovibrio	0.123645	51	Microtetraspora	0.144205	48	Desulfovibrio	0.104898	29	Synechococcus	0.114968	97	0.123441	7595	Amycolatopsis	Flavobacterium	0.165253	30	Aureispira
0.088597	51	Desulfovibrio	0.113646	39	Flavobacterium	0.085389	72	Synechococcus	0.105665	99	Bacteroides	0.111389	111	Bacteroides	0.104372	46	Streptococcus	0.121221	50	Flavobacterium	0.129183	43	Microtetraspora	0.097663	27	Desulfovibrio	0.112598	95	0.117086	7204	Synechococcus	Mycobacterium	0.165253	30	Arthrobacter
0.08686	50	Bacteroides	0.099076	34	Nocardia	0.084203	71	Bacteroides	0.102463	96	Mycobacterium	0.110385	110	Leptospira	0.102103	45	Bacteroides	0.118797	49	Desulfovibrio	0.120171	40	Corynebacterium	0.094046	26	Flavobacterium	0.107857	91	0.105254	6476	Sphingomonas	Bacteroides	0.154236	28	Erwinia
0.083385	48	Nocardia	0.093248	32	Synechococcus	0.079459	67	Desulfovibrio	0.088588	83	Vibrio	0.101354	101	Synechococcus	0.099834	44	Frankia	0.109099	45	Corynebacterium	0.120171	40	Mycobacterium	0.094046	26	Bacteroides	0.106672	90	0.104604	6436	Clostridium	Microbacterium	0.154236	28	Nocardia
0.081648	47	Flavobacterium	0.084506	29	Bacteroides	0.077087	65	Prevotella	0.087521	82	Synechococcus	0.09734	97	Prevotella	0.093027	41	Bradyrhizobium	0.10425	43	Streptococcus	0.111158	37	Bacteroides	0.086812	24	Sphingomonas	0.09956	84	0.103759	6384	Cellvibrio	Leptospira	0.143219	26	Lactococcus
0.072962	42	Leptospira	0.081592	28	Leptospira	0.073529	62	Corynebacterium	0.082184	77	Methylobacterium	0.093326	93	Vibrio	0.093027	41	Nocardia	0.101826	42	Sphingomonas	0.108154	36	Synechococcus	0.083195	23	Corynebacterium	0.09956	84	0.099435	6118	Aquimarina	Synechococcus	0.132202	24	Escherichia
0.072962	42	Vibrio	0.081592	28	Streptococcus	0.0676	57	Vibrio	0.08005	75	Desulfovibrio	0.090315	90	Corynebacterium	0.090759	40	Sphingomonas	0.096977	40	Synechococcus	0.102145	34	Flavobacterium	0.083195	23	Nocardia	0.09956	84	0.098363	6052	Burkholderia	Corynebacterium	0.121185	22	Sphingomonas
0.069488	40	Bradyrhizobium	0.081592	28	Amycolatopsis	0.066414	56	Prochlorococcus	0.078982	74	Mycoplasma	0.081284	81	Desulfovibrio	0.083952	37	Flavobacterium	0.096977	40	Nocardia	0.102145	34	Streptococcus	0.079578	22	Vibrio	0.086523	73	0.090626	5576	Actinomyces	Desulfovibrio	0.121185	22	Microbacterium
0.067751	39	Corynebacterium	0.07285	25	Vibrio	0.065228	55	Enterococcus	0.077915	73	Leptospira	0.075263	75	Nocardia	0.083952	37	Synechococcus	0.094552	39	Bradyrhizobium	0.096137	32	Vibrio	0.072343	20	Legionella	0.086523	73	0.076129	4684	Oligella	Nocardia	0.110169	20	Acidihalobacter
0.066013	38	Mycobacterium	0.069936	24	Legionella	0.06167	52	Chryseobacterium	0.076848	72	Prevotella	0.074259	74	Mycoplasma	0.079414	35	Amycolatopsis	0.089703	37	Leptospira	0.096137	32	Nocardia	0.072343	20	Acinetobacter	0.084152	71	0.073528	4524	Pyrococcus	Vibrio	0.10466	19	Lactobacillus
0.057327	33	Leptolyngbya	0.069936	24	Prevotella	0.059298	50	Mycoplasma	0.074713	70	Corynebacterium	0.072252	72	Treponema	0.079414	35	Streptacidiphilus	0.089703	37	Bacteroides	0.090128	30	Streptacidiphilus	0.072343	20	Enterococcus	0.079411	67	0.071155	4378	Corynebacterium	Sphingomonas	0.10466	19	Hyphomicrobium
0.05559	32	Prevotella	0.069936	24	Leptolyngbya	0.058112	49	Nocardia	0.070444	66	Nocardia	0.072252	72	Bradyrhizobium	0.077145	34	Corynebacterium	0.08243	34	Prevotella	0.087124	29	Prevotella	0.068726	19	Leptospira	0.071114	60	0.069221	4259	Paenibacillus	Bradyrhizobium	0.082626	15	Leptospira
0.05559	32	Sphingomonas	0.067022	23	Deinococcus	0.04981	42	Helicobacter	0.070444	66	Chryseobacterium	0.065228	65	Sphingomonas	0.068069	30	Legionella	0.08243	34	Streptacidiphilus	0.087124	29	Arthrobacter	0.065109	18	Herbaspirillum	0.071114	60	0.066881	4115	Mastigocladopsis	Acinetobacter	0.082626	15	Flavobacterium
0.052116	30	Treponema	0.067022	23	Actinomyces	0.04981	42	Burkholderia	0.062972	59	Treponema	0.064224	64	Chryseobacterium	0.068069	30	Acinetobacter	0.080006	33	Treponema	0.081115	27	Amycolatopsis	0.061492	17	Treponema	0.069929	59	0.065841	4051	Aureimonas	Treponema	0.082626	15	Synechococcus
0.050379	29	Acinetobacter	0.067022	23	Sphingomonas	0.04981	42	Pseudoalteromonas	0.05977	56	Acinetobacter	0.062217	62	Prochlorococcus	0.068069	30	Prevotella	0.080006	33	Rhodococcus	0.081115	27	Rhodococcus	0.061492	17	Prevotella	0.067559	57	0.065158	4009	Bacillus	Legionella	0.077118	14	Clostridium
0.048642	28	Enterococcus	0.067022	23	Dickeya	0.048624	41	Staphylococcus	0.055501	52	Helicobacter	0.06021	60	Shewanella	0.063531	28	Actinomyces	0.080006	33	Actinoplanes	0.081115	27	Halomonas	0.061492	17	Amycolatopsis	0.066374	56	0.062622	3853	Mycobacterium	Mycoplasma	0.077118	14	Archaeoglobus
0.048642	28	Microtetraspora	0.064108	22	Bradyrhizobium	0.047438	40	Frankia	0.055501	52	Prochlorococcus	0.06021	60	Legionella	0.063531	28	Rhodococcus	0.077581	32	Frankia	0.078111	26	Bradyrhizobium	0.061492	17	Burkholderia	0.066374	56	0.061761	3800	Myxosarcina	Leptolyngbya	0.077118	14	Chryseobacterium
0.048642	28	Burkholderia	0.064108	22	Acinetobacter	0.046252	39	Bradyrhizobium	0.054434	51	Bradyrhizobium	0.06021	60	Enterococcus	0.061262	27	Vibrio	0.072733	30	Vibrio	0.075107	25	Gordonia	0.057875	16	Shewanella	0.064003	54	0.057747	3553	Gordonia	Rhizobium	0.07161	13	Pararhodospirillum
0.046904	27	Legionella	0.064108	22	Frankia	0.046252	39	Acinetobacter	0.053366	50	Legionella	0.0572	57	Leptolyngbya	0.061262	27	Deinococcus	0.070308	29	Amycolatopsis	0.072102	24	Acinetobacter	0.057875	16	Bradyrhizobium	0.064003	54	0.05669	3488	Sorangium	Prevotella	0.066101	12	Shewanella
0.045167	26	Shewanella	0.064108	22	Microbacterium	0.046252	39	Leptolyngbya	0.052299	49	Rhizobium	0.056196	56	Acinetobacter	0.058993	26	Actinoplanes	0.067884	28	Mycoplasma	0.072102	24	Burkholderia	0.057875	16	Rhizobium	0.061633	52	0.049458	3043	Eubacterium	Amycolatopsis	0.066101	12	Spirosoma
0.045167	26	Actinomyces	0.061194	21	Rhodococcus	0.045066	38	Legionella	0.052299	49	Pseudoalteromonas	0.055193	55	Rhodococcus	0.058993	26	Gordonia	0.067884	28	Chryseobacterium	0.072102	24	Dickeya	0.057875	16	Chryseobacterium	0.058077	49	0.047393	2916	Catellicoccus	Enterococcus	0.066101	12	Helicobacter
0.045167	26	Amycolatopsis	0.061194	21	Actinoplanes	0.045066	38	Sphingomonas	0.050164	47	Enterococcus	0.055193	55	Streptacidiphilus	0.058993	26	Mycoplasma	0.06061	25	Acinetobacter	0.069098	23	Rhizobium	0.054257	15	Mycoplasma	0.056892	48	0.046971	2890	Oscillatoria	Chryseobacterium	0.060593	11	Acetobacter
0.045167	26	Mycoplasma	0.05828	20	Rhizobium	0.042694	36	Treponema	0.049097	46	Shewanella	0.054189	54	Helicobacter	0.056724	25	Leptospira	0.06061	25	Burkholderia	0.069098	23	Deinococcus	0.054257	15	Halomonas	0.056892	48	0.044484	2737	Borrelia	Ruminiclostridium	0.060593	11	Legionella
0.04343	25	Rhodococcus	0.05828	20	Paraburkholderia	0.042694	36	Streptacidiphilus	0.046962	44	Sphingomonas	0.052182	52	Rhizobium	0.054455	24	Rhizobium	0.058186	24	Legionella	0.066094	22	Leptospira	0.054257	15	Dickeya	0.055706	47	0.043964	2705	Butyrivibrio	Pseudoalteromonas	0.055084	10	Psychrobacter
0.041693	24	Helicobacter	0.055366	19	Treponema	0.040323	34	Shewanella	0.046962	44	Leptolyngbya	0.052182	52	Frankia	0.054455	24	Butyrivibrio	0.058186	24	Deinococcus	0.066094	22	Frankia	0.054257	15	Paraburkholderia	0.054521	46	0.042908	2640	Achromobacter	Xanthomonas	0.055084	10	Citrobacter
0.041693	24	Deinococcus	0.055366	19	Butyrivibrio	0.040323	34	Butyrivibrio	0.045895	43	Arthrobacter	0.051179	51	Ruminiclostridium	0.054455	24	Bifidobacterium	0.058186	24	Bifidobacterium	0.066094	22	Actinoplanes	0.05064	14	Butyrivibrio	0.054521	46	0.039885	2454	Prochlorococcus	Frankia	0.055084	10	Salmonella
0.041693	24	Paraburkholderia	0.055366	19	Prochlorococcus	0.040323	34	Amycolatopsis	0.045895	43	Frankia	0.047165	47	Actinomyces	0.054455	24	Ruminiclostridium	0.055762	23	Rhizobium	0.06309	21	Legionella	0.05064	14	Calothrix	0.053336	45	0.039625	2438	Nocardia	Shewanella	0.055084	10	Vibrio
0.038218	22	Herbaspirillum	0.055366	19	Arthrobacter	0.039137	33	Rhizobium	0.044828	42	Actinomyces	0.047165	47	Halomonas	0.052186	23	Treponema	0.055762	23	Gordonia	0.06309	21	Mycoplasma	0.05064	14	Nocardiopsis	0.053336	45	0.038991	2399	Fischerella	Helicobacter	0.055084	10	Haemophilus
0.036481	21	Rhizobium	0.052452	18	Burkholderia	0.037951	32	Gordonia	0.042693	40	Butyrivibrio	0.046161	46	Paraburkholderia	0.052186	23	Burkholderia	0.055762	23	Mesorhizobium	0.060085	20	Treponema	0.047023	13	Gordonia	0.052151	44	0.038389	2362	Anabaena	Prochlorococcus	0.055084	10	Desulfovibrio
0.034744	20	Prochlorococcus	0.049538	17	Neisseria	0.036765	31	Campylobacter	0.042693	40	Amycolatopsis	0.045158	45	Butyrivibrio	0.052186	23	Dickeya	0.053337	22	Butyrivibrio	0.060085	20	Enterococcus	0.047023	13	Microbacterium	0.04978	42	0.037723	2321	Pseudanabaena	Gordonia	0.049576	9	Pseudanabaena
0.034744	20	Halomonas	0.049538	17	Mycoplasma	0.036765	31	Methylobacterium	0.042693	40	Cyanothece	0.045158	45	Burkholderia	0.049917	22	Leptolyngbya	0.053337	22	Enterococcus	0.060085	20	Actinomyces	0.043406	12	Prochlorococcus	0.04978	42	0.035691	2196	Maribius	Burkholderia	0.049576	9	Deinococcus
0.033007	19	Staphylococcus	0.049538	17	Halomonas	0.036765	31	Actinoplanes	0.040558	38	Fusobacterium	0.044154	44	Staphylococcus	0.047648	21	Myxococcus	0.053337	22	Sorangium	0.060085	20	Bifidobacterium	0.043406	12	Ruminiclostridium	0.04741	40	0.035561	2188	Legionella	Arthrobacter	0.049576	9	Actinomyces
0.033007	19	Pseudoalteromonas	0.046624	16	Enterococcus	0.035579	30	Arthrobacter	0.040558	38	Ruminiclostridium	0.044154	44	Actinoplanes	0.047648	21	Staphylococcus	0.050913	21	Shewanella	0.057081	19	Butyrivibrio	0.039789	11	Fusobacterium	0.04741	40	0.03392	2087	Paracoccus	Halomonas	0.049576	9	Corynebacterium
0.033007	19	Sphingobium	0.046624	16	Ruminiclostridium	0.035579	30	Nocardiopsis	0.039491	37	Staphylococcus	0.042147	42	Porphyromonas	0.047648	21	Enterococcus	0.050913	21	Actinomyces	0.054077	18	Neisseria	0.039789	11	Deinococcus	0.045039	38	0.030783	1894	Acidiphilium	Actinomyces	0.049576	9	Mycobacterium
0.033007	19	Oribacterium	0.04371	15	Hyphomonas	0.035579	30	Halomonas	0.038424	36	Gordonia	0.042147	42	Bifidobacterium	0.047648	21	Nocardiopsis	0.050913	21	Dickeya	0.054077	18	Brevundimonas	0.039789	11	Actinomyces	0.043854	37	0.029499	1815	Goodfellowiella	Rhodococcus	0.049576	9	Nocardiopsis
0.03127	18	Arthrobacter	0.04371	15	Nocardiopsis	0.035579	30	Paraburkholderia	0.037356	35	Porphyromonas	0.042147	42	Pseudoalteromonas	0.047648	21	Paraburkholderia	0.048488	20	Fusobacterium	0.054077	18	Ruminiclostridium	0.039789	11	Bifidobacterium	0.042669	36	0.0288	1772	Halorubrum	Butyrivibrio	0.049576	9	Geobacter
0.03127	18	Bifidobacterium	0.04371	15	Gordonia	0.034393	29	Deinococcus	0.037356	35	Deinococcus	0.041144	41	Deinococcus	0.045379	20	Shewanella	0.048488	20	Prochlorococcus	0.051073	17	Prochlorococcus	0.039789	11	Rhodococcus	0.042669	36	0.028784	1771	Gloeobacter	Staphylococcus	0.049576	9	Ferroplasma
0.03127	18	Frankia	0.04371	15	Kitasatospora	0.034393	29	Actinomyces	0.037356	35	Halomonas	0.038133	38	Methylobacterium	0.045379	20	Prochlorococcus	0.048488	20	Nocardiopsis	0.051073	17	Sorangium	0.039789	11	Saccharomonospora	0.041483	35	0.02841	1748	Acaryochloris	Actinoplanes	0.044067	8	Cupriavidus
0.03127	18	Chryseobacterium	0.04371	15	Pseudoalteromonas	0.033207	28	Rhodococcus	0.036289	34	Ruminococcus	0.038133	38	Gordonia	0.04311	19	Herbaspirillum	0.048488	20	Halomonas	0.051073	17	Flexithrix	0.039789	11	Brevundimonas	0.041483	35	0.028069	1727	Geminocystis	Streptacidiphilus	0.044067	8	Persephonella
0.03127	18	Streptacidiphilus	0.04371	15	Mesorhizobium	0.033207	28	Ruminiclostridium	0.036289	34	Streptacidiphilus	0.038133	38	Lachnoclostridium	0.04311	19	Saccharothrix	0.046064	19	Pseudoalteromonas	0.051073	17	Haloquadratum	0.039789	11	Leptolyngbya	0.040298	34	0.02789	1716	Alloprevotella	Campylobacter	0.044067	8	Skermanella
0.03127	18	Ruminiclostridium	0.04371	15	Pedobacter	0.032021	27	Porphyromonas	0.036289	34	Paraburkholderia	0.03713	37	Microbacterium	0.04311	19	Halomonas	0.04364	18	Arthrobacter	0.048068	16	Nocardioides	0.039789	11	Pseudoalteromonas	0.040298	34	0.027825	1712	Lysinimicrobium	Deinococcus	0.044067	8	Crinalium
0.029532	17	Butyrivibrio	0.04371	15	Hymenobacter	0.032021	27	Ruminococcus	0.035222	33	Pedobacter	0.03713	37	Pedobacter	0.04311	19	Microbacterium	0.04364	18	Paraburkholderia	0.048068	16	Kitasatospora	0.039789	11	Brevibacillus	0.040298	34	0.02711	1668	Vibrio	Paraburkholderia	0.044067	8	Pontibacillus
0.029532	17	Calothrix	0.04371	15	Streptacidiphilus	0.029649	25	Fusobacterium	0.034154	32	Myxococcus	0.036126	36	Campylobacter	0.04311	19	Mesorhizobium	0.041215	17	Cyanothece	0.048068	16	Paraburkholderia	0.036172	10	Campylobacter	0.036742	31	0.026882	1654	Streptacidiphilus	Desulfotomaculum	0.044067	8	Rubellimicrobium
0.029532	17	Mesorhizobium	0.040796	14	Enterobacter	0.029649	25	Herbaspirillum	0.034154	32	Herbaspirillum	0.036126	36	Herbaspirillum	0.040841	18	Neisseria	0.038791	16	Methylobacterium	0.045064	15	Helicobacter	0.036172	10	Chlamydia	0.036742	31	0.026834	1651	Caballeronia	Aureimonas	0.044067	8	Adhaeribacter
0.027795	16	Actinoplanes	0.037882	13	Shewanella	0.028463	24	Cyanothece	0.034154	32	Nocardiopsis	0.035123	35	Fusobacterium	0.040841	18	Arthrobacter	0.038791	16	Herbaspirillum	0.045064	15	Xanthomonas	0.036172	10	Desulfotomaculum	0.035557	30	0.026346	1621	Nocardiopsis	Spirosoma	0.044067	8	Sandarakinorhabdus
0.027795	16	Cyanothece	0.037882	13	Porphyromonas	0.028463	24	Brevibacillus	0.034154	32	Mesorhizobium	0.035123	35	Oribacterium	0.038572	17	Cellulomonas	0.038791	16	Staphylococcus	0.045064	15	Enterobacter	0.036172	10	Frankia	0.035557	30	0.025923	1595	Streptococcus	Bifidobacterium	0.038559	7	Haladaptatus
0.027795	16	Candidatus Accumulibacter	0.037882	13	Herbaspirillum	0.028463	24	Lachnoclostridium	0.033087	31	Calothrix	0.034119	34	Desulfotomaculum	0.038572	17	Kitasatospora	0.038791	16	Kitasatospora	0.045064	15	Thioalkalivibrio	0.036172	10	Streptacidiphilus	0.035557	30	0.025159	1548	Rubidibacter	Nocardiopsis	0.038559	7	Rivularia
0.026058	15	Ruminococcus	0.037882	13	Haloquadratum	0.026091	22	Desulfotomaculum	0.033087	31	Burkholderia	0.033116	33	Calothrix	0.036303	16	Cellvibrio	0.036366	15	Myxococcus	0.04206	14	Desulfotomaculum	0.032554	9	Spirochaeta	0.035557	30	0.025111	1545	Sulfolobus	Cyanothece	0.038559	7	Methermicoccus
0.026058	15	Nocardiopsis	0.037882	13	Ktedonobacter	0.026091	22	Brachyspira	0.033087	31	Oribacterium	0.033116	33	Candidatus Accumulibacter	0.036303	16	Campylobacter	0.036366	15	Hyphomonas	0.04206	14	Nocardiopsis	0.032554	9	Staphylococcus	0.035557	30	0.024493	1507	Porphyrobacter	Dickeya	0.038559	7	Bavariicoccus
0.026058	15	Gordonia	0.037882	13	Lachnoclostridium	0.026091	22	Pantoea	0.03202	30	Bifidobacterium	0.032112	32	Chlamydia	0.036303	16	Porphyromonas	0.036366	15	Helicobacter	0.04206	14	Moorea	0.032554	9	Arthrobacter	0.034372	29	0.024217	1490	Actinomadura	Acidihalobacter	0.038559	7	Caldanaerobius
0.026058	15	Alicyclobacillus	0.037882	13	Acidihalobacter	0.026091	22	Ferroglobus	0.030952	29	Brevibacillus	0.032112	32	Mesorhizobium	0.036303	16	Sorangium	0.036366	15	Paracoccus	0.039055	13	Saccharothrix	0.032554	9	Pantoea	0.033187	28	0.024136	1485	Deinococcus	Ruminococcus	0.038559	7	Pedosphaera
0.026058	15	Cupriavidus	0.034968	12	Paracoccus	0.026091	22	Dickeya	0.030952	29	Lachnoclostridium	0.032112	32	Ktedonobacter	0.036303	16	Pseudoalteromonas	0.036366	15	Ruminococcus	0.036051	12	Myxococcus	0.028937	8	Chondromyces	0.033187	28	0.02316	1425	Leptolyngbya	Ktedonobacter	0.038559	7	Lonsdalea
0.024321	14	Cellvibrio	0.034968	12	Chlamydia	0.026091	22	Alistipes	0.029885	28	Methanobacterium	0.031109	31	Nocardiopsis	0.036303	16	Chryseobacterium	0.036366	15	Leptolyngbya	0.036051	12	Caulobacter	0.028937	8	Helicobacter	0.033187	28	0.022868	1407	Desulfovibrio	Lysinibacillus	0.038559	7	Algiphilus
0.024321	14	Paracoccus	0.034968	12	Saccharothrix	0.026091	22	Oribacterium	0.029885	28	Aquimarina	0.030105	30	Methanobacterium	0.034034	15	Agrobacterium	0.036366	15	Pedobacter	0.036051	12	Agrobacterium	0.028937	8	Achromobacter	0.032002	27	0.022136	1362	Bacteroides	Fusobacterium	0.038559	7	Kosakonia
0.024321	14	Chlamydia	0.034968	12	Sorangium	0.024905	21	Calothrix	0.028818	27	Desulfotomaculum	0.029102	29	Cellvibrio	0.034034	15	Marinobacter	0.036366	15	Ktedonobacter	0.036051	12	Herbaspirillum	0.028937	8	Thermus	0.032002	27	0.021129	1300	Brevibacillus	Calothrix	0.038559	7	Ruminiclostridium
0.024321	14	Saccharothrix	0.034968	12	Brevibacillus	0.024905	21	Marinobacter	0.028818	27	Brachyspira	0.029102	29	Hyphomonas	0.031765	14	Isosphaera	0.036366	15	Ruminiclostridium	0.036051	12	Halobacterium	0.028937	8	Yersinia	0.032002	27	0.020674	1272	Rhodococcus	Kitasatospora	0.033051	6	Paraburkholderia
0.024321	14	Hymenobacter	0.034968	12	Alistipes	0.024905	21	Desulfosporosinus	0.027751	26	Spirochaeta	0.029102	29	Hymenobacter	0.031765	14	Spirochaeta	0.033942	14	Cellulomonas	0.036051	12	Pseudoalteromonas	0.028937	8	Porphyromonas	0.032002	27	0.020625	1269	Acinetobacter	Pedobacter	0.033051	6	Azorhizobium
0.024321	14	Endozoicomonas	0.032054	11	Chondromyces	0.024905	21	Pedobacter	0.026683	25	Rhodococcus	0.028098	28	Kitasatospora	0.031765	14	Helicobacter	0.033942	14	Oribacterium	0.036051	12	Novosphingobium	0.028937	8	Kitasatospora	0.032002	27	0.020625	1269	Mycoplasma	Oribacterium	0.033051	6	Cellvibrio
0.022584	13	Hyphomicrobium	0.032054	11	Campylobacter	0.024905	21	Candidatus Pelagibacter	0.026683	25	Actinoplanes	0.028098	28	Cyanothece	0.031765	14	Brevundimonas	0.031517	13	Isosphaera	0.036051	12	Ktedonobacter	0.028937	8	Methanobacterium	0.030816	26	0.020446	1258	Rubrobacter	Chondromyces	0.033051	6	Myxococcus
0.022584	13	Spirochaeta	0.032054	11	Thermus	0.023719	20	Cellvibrio	0.026683	25	Sorangium	0.028098	28	Aquimarina	0.031765	14	Ktedonobacter	0.031517	13	Campylobacter	0.036051	12	Lachnoclostridium	0.028937	8	Haloarcula	0.030816	26	0.020235	1245	Dickeya	Mesorhizobium	0.033051	6	Chondromyces
0.022584	13	Campylobacter	0.032054	11	Bartonella	0.023719	20	Capnocytophaga	0.025616	24	Hyphomonas	0.027095	27	Fischerella	0.029497	13	Nocardioides	0.031517	13	Lewinella	0.033047	11	Cellvibrio	0.028937	8	Geobacter	0.029631	25	0.020007	1231	Frankia	Neisseria	0.033051	6	Hyphomonas
0.022584	13	Fusobacterium	0.032054	11	Ruminococcus	0.023719	20	Actinomadura	0.025616	24	Eubacterium	0.027095	27	Ruminococcus	0.029497	13	Janthinobacterium	0.031517	13	Massilia	0.033047	11	Shewanella	0.028937	8	Kutzneria	0.029631	25	0.019877	1223	Methylotenera	Porphyromonas	0.033051	6	Gemmata
0.022584	13	Actinoalloteichus	0.032054	11	Bifidobacterium	0.023719	20	Microbacterium	0.025616	24	Thermococcus	0.027095	27	Arthrobacter	0.029497	13	Novosphingobium	0.031517	13	Alistipes	0.033047	11	Selenomonas	0.028937	8	Cupriavidus	0.029631	25	0.019812	1219	Rhizobium	Saccharothrix	0.033051	6	Pirellula
0.020846	12	Hyphomonas	0.032054	11	Cellulomonas	0.023719	20	Cyclobacterium	0.024549	23	Spirosoma	0.027095	27	Thermococcus	0.029497	13	Aureimonas	0.029093	12	Porphyromonas	0.033047	11	Pseudanabaena	0.028937	8	Dyadobacter	0.029631	25	0.019617	1207	Veillonella	Lachnoclostridium	0.033051	6	Leptospirillum
0.020846	12	Thermus	0.032054	11	Thermococcus	0.022533	19	Spirochaeta	0.024549	23	Neisseria	0.026091	26	Neisseria	0.029497	13	Blautia	0.029093	12	Saccharothrix	0.033047	11	Saccharomonospora	0.028937	8	Anaeromyxobacter	0.028446	24	0.018983	1168	Kitasatospora	Sphingobium	0.033051	6	Azospirillum
0.020846	12	Neisseria	0.032054	11	Flexithrix	0.022533	19	Chlamydia	0.024549	23	Arcobacter	0.026091	26	Capnocytophaga	0.027228	12	Selenomonas	0.029093	12	Marinobacter	0.033047	11	Leptolyngbya	0.028937	8	Candidatus Pelagibacter	0.027261	23	0.018967	1167	Enterococcus	Bartonella	0.033051	6	Rhizobium
0.020846	12	Psychrobacter	0.02914	10	Spirosoma	0.022533	19	Methanobrevibacter	0.024549	23	Desulfosporosinus	0.026091	26	Geobacter	0.027228	12	Capnocytophaga	0.029093	12	Natrialba	0.033047	11	Lewinella	0.028937	8	Ktedonobacter	0.027261	23	0.018756	1154	Gluconacetobacter	Brachyspira	0.033051	6	Methylosinus
0.020846	12	Selenomonas	0.02914	10	Spirochaeta	0.022533	19	Thioalkalivibrio	0.024549	23	Aureimonas	0.026091	26	Sorangium	0.027228	12	Ruminococcus	0.029093	12	Desulfosporosinus	0.033047	11	Coleofasciculus	0.028937	8	Arenimonas	0.027261	23	0.018642	1147	Myxococcus	Desulfosporosinus	0.027542	5	Neisseria
0.020846	12	Capnocytophaga	0.02914	10	Xanthomonas	0.021347	18	Myxococcus	0.023481	22	Capnocytophaga	0.025088	25	Thermus	0.027228	12	Desulfotomaculum	0.029093	12	Cupriavidus	0.030043	10	Chondromyces	0.02532	7	Spirosoma	0.027261	23	0.018642	1147	Cellulomonas	Aquimarina	0.027542	5	Beijerinckia
0.020846	12	Oscillatoria	0.02914	10	Halorubrum	0.021347	18	Spirosoma	0.023481	22	Dickeya	0.025088	25	Serratia	0.027228	12	Cupriavidus	0.029093	12	Sphingobium	0.030043	10	Spirochaeta	0.02532	7	Paracoccus	0.026075	22	0.018626	1146	Promicromonospora	Chlamydia	0.027542	5	Serratia
0.020846	12	Desulfotomaculum	0.026226	9	Lysobacter	0.021347	18	Oscillatoria	0.023481	22	Alistipes	0.025088	25	Photobacterium	0.027228	12	Anaeromyxobacter	0.029093	12	Aquimarina	0.030043	10	Serratia	0.02532	7	Methylobacterium	0.026075	22	0.018528	1140	Arcticibacter	Herbaspirillum	0.027542	5	Xenorhabdus
0.020846	12	Thermococcus	0.026226	9	Comamonas	0.021347	18	Sphingobacterium	0.023481	22	Acidihalobacter	0.025088	25	Rhodopseudomonas	0.027228	12	Aquimarina	0.029093	12	Candidatus Accumulibacter	0.030043	10	Chlamydia	0.02532	7	Bartonella	0.026075	22	0.018024	1109	Bradyrhizobium	Oscillatoria	0.027542	5	Photobacterium
0.020846	12	Janthinobacterium	0.026226	9	Serratia	0.021347	18	Algoriphagus	0.022414	21	Selenomonas	0.025088	25	Cellulomonas	0.024959	11	Chondromyces	0.029093	12	Parabacteroides	0.030043	10	Oscillatoria	0.02532	7	Erythrobacter	0.026075	22	0.017862	1099	Pleurocapsa	Nocardioides	0.027542	5	Bartonella
0.020846	12	Cyclobacterium	0.026226	9	Oscillatoria	0.021347	18	Candidatus Accumulibacter	0.022414	21	Saccharothrix	0.025088	25	Arcobacter	0.024959	11	Enterobacter	0.026669	11	Spirosoma	0.030043	10	Calothrix	0.02532	7	Cellulomonas	0.026075	22	0.017781	1094	Chamaesiphon	Thermococcus	0.027542	5	Rickettsia
0.019109	11	Spirosoma	0.026226	9	Fischerella	0.020161	17	Eubacterium	0.022414	21	Leptotrichia	0.025088	25	Peptoniphilus	0.024959	11	Chlamydia	0.026669	11	Neisseria	0.030043	10	Micromonospora	0.02532	7	Actinoplanes	0.026075	22	0.017553	1080	Shewanella	Pantoea	0.027542	5	Chlamydia
0.019109	11	Isosphaera	0.026226	9	Trichodesmium	0.020161	17	Geobacter	0.022414	21	Hymenobacter	0.025088	25	Sphingobium	0.024959	11	Pantoea	0.026669	11	Nocardioides	0.030043	10	Thermococcus	0.02532	7	Marinobacter	0.026075	22	0.016692	1027	Arthrobacter	Lewinella	0.027542	5	Desulfococcus
0.019109	11	Aeromonas	0.026226	9	Desulfotomaculum	0.020161	17	Mesorhizobium	0.022414	21	Candidatus Pelagibacter	0.025088	25	Candidatus Pelagibacter	0.024959	11	Thioalkalivibrio	0.026669	11	Thermococcus	0.030043	10	Cyanothece	0.02532	7	Desulfosporosinus	0.026075	22	0.016594	1021	Paraburkholderia	Candidatus Pelagibacter	0.027542	5	Thiothrix
0.019109	11	Porphyromonas	0.026226	9	Actinomadura	0.020161	17	Lewinella	0.022414	21	Algoriphagus	0.024084	24	Spirochaeta	0.024959	11	Oribacterium	0.026669	11	Pantoea	0.030043	10	Alcanivorax	0.02532	7	Gloeocapsa	0.026075	22	0.016334	1005	Amorphus	Candidatus Accumulibacter	0.027542	5	Thiocapsa
0.019109	11	Pyrobaculum	0.026226	9	Marinobacter	0.018975	16	Hyphomonas	0.022414	21	Endozoicomonas	0.024084	24	Bartonella	0.024959	11	Labrenzia	0.026669	11	Alcanivorax	0.030043	10	Mesorhizobium	0.02532	7	Thioalkalivibrio	0.02489	21	0.016172	995	Cobetia	Spirochaeta	0.027542	5	Rhodopseudomonas
0.019109	11	Anaeromyxobacter	0.026226	9	Pantoea	0.018975	16	Xanthomonas	0.022414	21	Lysinibacillus	0.024084	24	Methanobrevibacter	0.02269	10	Hyphomicrobium	0.026669	11	Candidatus Pelagibacter	0.030043	10	Pedobacter	0.02532	7	Alistipes	0.02489	21	0.016155	994	Porphyromonas	Capnocytophaga	0.027542	5	Chlorobium
0.019109	11	Dickeya	0.026226	9	Thioalkalivibrio	0.018975	16	Selenomonas	0.021347	20	Isosphaera	0.024084	24	Methanocaldococcus	0.02269	10	Psychrobacter	0.026669	11	Caballeronia	0.030043	10	Oribacterium	0.02532	7	Aquimarina	0.02489	21	0.015148	932	Geitlerinema	Cellulomonas	0.027542	5	Pelodictyon
0.019109	11	Rhodopirellula	0.026226	9	Massilia	0.018975	16	Fischerella	0.021347	20	Chlamydia	0.024084	24	Alistipes	0.02269	10	Eubacterium	0.024244	10	Cystobacter	0.027038	9	Hyphomonas	0.02532	7	Lysinibacillus	0.02489	21	0.014888	916	Actinoplanes	Actinomadura	0.027542	5	Spirulina
0.019109	11	Pontibacillus	0.026226	9	Sphingobium	0.018975	16	Pyrobaculum	0.021347	20	Pantoea	0.024084	24	Algoriphagus	0.02269	10	Pseudonocardia	0.024244	10	Caulobacter	0.027038	9	Paracoccus	0.02532	7	Blautia	0.02489	21	0.014888	916	Jonesia	Marinobacter	0.027542	5	Oscillatoria
0.019109	11	Aquimarina	0.026226	9	Oribacterium	0.018975	16	Hymenobacter	0.021347	20	Thioalkalivibrio	0.023081	23	Desulfosporosinus	0.02269	10	Thermococcus	0.024244	10	Bordetella	0.027038	9	Fusobacterium	0.021703	6	Methylosinus	0.02489	21	0.01466	902	Prevotella	Asticcacaulis	0.027542	5	Anabaena
0.017372	10	Yersinia	0.026226	9	Parabacteroides	0.018975	16	Peptoniphilus	0.020279	19	Thermus	0.023081	23	Anaerococcus	0.02269	10	Acidovorax	0.024244	10	Oscillatoria	0.027038	9	Capnocytophaga	0.021703	6	Selenomonas	0.02489	21	0.014546	895	Flavobacterium	Dyadobacter	0.027542	5	Nostoc
0.017372	10	Thermodesulfobacterium	0.023312	8	Helicobacter	0.018975	16	Pontibacillus	0.020279	19	Agrobacterium	0.022077	22	Oscillatoria	0.02269	10	Sphingobacterium	0.024244	10	Micromonospora	0.027038	9	Fischerella	0.021703	6	Capnocytophaga	0.023705	20	0.014368	884	Chlamydia	Cellvibrio	0.027542	5	Calothrix
0.017372	10	Nocardioides	0.023312	8	Fusobacterium	0.018975	16	Aquimarina	0.020279	19	Verrucomicrobium	0.022077	22	Eubacterium	0.02269	10	Alicyclobacillus	0.024244	10	Actinomadura	0.027038	9	Brevibacterium	0.021703	6	Pseudanabaena	0.023705	20	0.014026	863	Microbispora	Paracoccus	0.027542	5	Micrococcus
0.017372	10	Sorangium	0.023312	8	Pseudanabaena	0.018975	16	Lysinibacillus	0.020279	19	Geobacter	0.022077	22	Nocardioides				0.024244	10	Pyrobaculum	0.027038	9	Cellulomonas	0.021703	6	Oscillatoria	0.023705	20	0.013961	859	Algiphilus	Agrobacterium	0.027542	5	Streptococcus
0.017372	10	Pantoea	0.023312	8	Calothrix	0.017789	15	Isosphaera	0.020279	19	Alicyclobacillus	0.022077	22	Methanococcus				0.024244	10	Thioalkalivibrio	0.027038	9	Actinomadura	0.021703	6	Anabaena	0.023705	20	0.013945	858	Nostoc	Fischerella	0.027542	5	Desulfotomaculum
0.017372	10	Brevibacillus	0.023312	8	Gemella	0.017789	15	Agrobacterium	0.020279	19	Peptoniphilus	0.022077	22	Pantoea				0.024244	10	Dyadobacter	0.027038	9	Marinobacter	0.021703	6	Nocardioides	0.023705	20	0.013457	828	Methylocapsa	Sorangium	0.027542	5	Kurthia
0.017372	10	Halorubrum	0.023312	8	Methanobacterium	0.017789	15	Neisseria	0.020279	19	Sphingobium	0.022077	22	Brevibacillus				0.024244	10	Peptoniphilus	0.027038	9	Chryseobacterium	0.021703	6	Actinomadura	0.023705	20	0.013441	827	Oribacterium	Alistipes	0.027542	5	Saccharopolyspora
0.017372	10	Alcanivorax	0.023312	8	Geobacter	0.017789	15	Bifidobacterium	0.020279	19	Methanocaldococcus	0.022077	22	Lewinella				0.024244	10	Novosphingobium	0.027038	9	Frateuria	0.021703	6	Microbispora	0.02252	19	0.013376	823	Leptospira	Thermus	0.027542	5	Nocardioides
0.017372	10	Desulfosporosinus	0.023312	8	Brevundimonas	0.017789	15	Cellulomonas	0.020279	19	Blautia	0.022077	22	Dyadobacter				0.024244	10	Lachnoclostridium	0.027038	9	Alistipes	0.021703	6	Saccharothrix	0.02252	19	0.013051	803	Jiangella	Yersinia	0.027542	5	Frankia
0.017372	10	Plesiocystis	0.023312	8	Geitlerinema	0.017789	15	Methanobacterium	0.019212	18	Oscillatoria	0.021074	21	Spirosoma				0.024244	10	Acidihalobacter	0.027038	9	Pontibacillus	0.021703	6	Arcobacter	0.02252	19	0.013019	801	Proteiniphilum	Arcobacter	0.027542	5	Microbispora
0.017372	10	Methanocaldococcus	0.023312	8	Dyadobacter	0.017789	15	Colwellia	0.019212	18	Fischerella	0.021074	21	Isosphaera				0.02182	9	Spirochaeta	0.027038	9	Aquimarina	0.021703	6	Colwellia	0.02252	19	0.012986	799	Acidovorax	Halorubrum	0.027542	5	Aeromicrobium
0.017372	10	Aureispira	0.023312	8	Anaeromyxobacter	0.017789	15	Sorangium	0.019212	18	Thermodesulfobacterium	0.021074	21	Brachyspira				0.02182	9	Achromobacter	0.027038	9	Candidatus Accumulibacter	0.021703	6	Sphingobacterium	0.02252	19	0.012775	786	Frateuria	Parabacteroides	0.027542	5	Mycoplasma
0.017372	10	Lachnoclostridium	0.023312	8	Marinimicrobium	0.017789	15	Alcanivorax	0.019212	18	Ferroglobus	0.021074	21	Alcanivorax				0.02182	9	Thermus	0.027038	9	Acidihalobacter	0.021703	6	Thauera	0.02252	19	0.012694	781	Treponema	Moorea	0.027542	5	Methanobacterium
0.015635	9	Myxococcus	0.023312	8	Blautia	0.017789	15	Sphingobium	0.019212	18	Dyadobacter	0.021074	21	Massilia				0.02182	9	Agrobacterium	0.027038	9	Caballeronia	0.021703	6	Cyanothece	0.021334	18	0.012694	781	Thermus	Myxococcus	0.027542	5	Methanobrevibacter
0.015635	9	Chondromyces	0.023312	8	Moorea	0.017789	15	Methanocaldococcus	0.018145	17	Caulobacter	0.021074	21	Blautia				0.02182	9	Aeromonas	0.024034	8	Spirosoma	0.021703	6	Ralstonia	0.021334	18	0.012612	776	Sphingobacterium	Photobacterium	0.027542	5	Methanohalophilus
0.015635	9	Lysobacter	0.020398	7	Myxococcus	0.016603	14	Lysobacter	0.018145	17	Campylobacter	0.02007	20	Saccharothrix				0.02182	9	Eubacterium	0.024034	8	Campylobacter	0.021703	6	Alcanivorax	0.021334	18	0.012515	770	Bifidobacterium	Selenomonas	0.022034	4	Haloarcula
0.015635	9	Caulobacter	0.020398	7	Azospirillum	0.016603	14	Yersinia	0.018145	17	Serratia	0.02007	20	Sphingobacterium				0.02182	9	Methanococcus	0.024034	8	Porphyromonas	0.021703	6	Pedobacter	0.021334	18	0.012498	769	Granulicella	Pseudanabaena	0.022034	4	Sulfolobus
0.015635	9	Comamonas	0.020398	7	Agrobacterium	0.016603	14	Nocardioides	0.018145	17	Photobacterium	0.02007	20	Thioalkalivibrio				0.02182	9	Janthinobacterium	0.024034	8	Ruminococcus	0.021703	6	Hymenobacter	0.021334	18	0.01245	766	Thermococcus	Methanosarcina	0.022034	4	Halanaerobium
0.015635	9	Eubacterium	0.020398	7	Chlorobium	0.016603	14	Saccharothrix	0.018145	17	Microtetraspora	0.02007	20	Dickeya				0.02182	9	Weissella	0.024034	8	Staphylococcus	0.021703	6	Rubellimicrobium	0.020149	17	0.012385	762	Spirochaeta	Hyphomonas	0.022034	4	Teredinibacter
0.015635	9	Kitasatospora	0.020398	7	Thermodesulfobacterium	0.016603	14	Methanococcus	0.018145	17	Kitasatospora	0.019067	19	Lysobacter				0.02182	9	Nitrososphaera	0.024034	8	Arcobacter	0.021703	6	Endozoicomonas	0.020149	17	0.01219	750	Ruminiclostridium	Serratia	0.022034	4	Cardiobacterium
0.015635	9	Methanobacterium	0.020398	7	Saccharomonospora	0.016603	14	Leptotrichia	0.018145	17	Spiroplasma	0.019067	19	Achromobacter				0.019395	8	Cellvibrio	0.024034	8	Photorhabdus	0.021703	6	Candidatus Accumulibacter	0.020149	17	0.011881	731	Pseudoalteromonas	Chlorobium	0.022034	4	Hirschia
0.015635	9	Methanococcus	0.020398	7	Micromonospora	0.016603	14	Oceanobacillus	0.018145	17	Pyrobaculum	0.019067	19	Xanthomonas				0.019395	8	Chondromyces	0.024034	8	Ralstonia	0.021703	6	Lachnoclostridium	0.020149	17	0.011588	713	Buchnera	Eubacterium	0.022034	4	Acidovorax
0.015635	9	Colwellia	0.020398	7	Microbispora	0.016603	14	Plesiocystis	0.018145	17	Sphingobacterium	0.019067	19	Aeromonas				0.019395	8	Leptospirillum	0.024034	8	Pantoea	0.018086	5	Hyphomicrobium	0.020149	17	0.011491	707	Caulobacter	Pseudonocardia	0.022034	4	Magnetospirillum
0.015635	9	Brachyspira	0.020398	7	Spiroplasma	0.016603	14	Endozoicomonas	0.018145	17	Gloeobacter	0.019067	19	Chlorobium				0.019395	8	Enterobacter	0.024034	8	Brevibacillus	0.018086	5	Runella	0.020149	17	0.011458	705	Smithella	Hymenobacter	0.022034	4	Alicyclobacillus
0.015635	9	Gloeobacter	0.020398	7	Pyrobaculum	0.016603	14	Ktedonobacter	0.018145	17	Halobacillus	0.019067	19	Janthinobacterium				0.019395	8	Chlamydia	0.024034	8	Halorubrum	0.018086	5	Gemmata	0.020149	17	0.01141	702	Cohnella	Cupriavidus	0.022034	4	Leptonema
0.015635	9	Brevundimonas	0.020398	7	Gloeobacter	0.016603	14	Blautia	0.018145	17	Cellulophaga	0.019067	19	Cupriavidus				0.019395	8	Selenomonas	0.024034	8	Roseiflexus	0.018086	5	Isosphaera	0.020149	17	0.011377	700	Sphingobium	Massilia	0.022034	4	Rahnella
0.015635	9	Halobacillus	0.020398	7	Exiguobacterium	0.016603	14	Acidihalobacter	0.018145	17	Anaeromyxobacter	0.019067	19	Pontibacillus				0.019395	8	Calothrix	0.024034	8	Anaeromyxobacter	0.018086	5	Neisseria	0.020149	17	0.011215	690	Alkaliphilus	Methanocaldococcus	0.022034	4	Blattabacterium
0.015635	9	Geitlerinema	0.020398	7	Chryseobacterium	0.015417	13	Azospirillum	0.017077	16	Providencia	0.019067	19	Lysinibacillus				0.019395	8	Pseudonocardia	0.024034	8	Plesiocystis	0.018086	5	Serratia	0.020149	17	0.011101	683	Halomonas	Caballeronia	0.022034	4	Sorangium
0.015635	9	Flexithrix	0.020398	7	Alcanivorax	0.015417	13	Thermus	0.017077	16	Rhodopseudomonas	0.018063	18	Myxococcus				0.019395	8	Saccharomonospora	0.024034	8	Endozoicomonas	0.018086	5	Aeromonas	0.018964	16	0.011068	681	Prochlorothrix	Lysobacter	0.022034	4	Methylomicrobium
0.015635	9	Peptoniphilus	0.020398	7	Lewinella	0.015417	13	Serratia	0.017077	16	Chloroflexus	0.018063	18	Chondromyces				0.019395	8	Methanobacterium	0.02103	7	Hyphomicrobium	0.018086	5	Thiothrix	0.018964	16	0.011052	680	Sinorhizobium	Methanobacterium	0.022034	4	Sutterella
0.015635	9	Alistipes	0.020398	7	Asticcacaulis	0.015417	13	Photobacterium	0.017077	16	Listeria	0.018063	18	Gemmata				0.019395	8	Sulfolobus	0.02103	7	Thermus	0.018086	5	Fischerella	0.018964	16	0.011036	679	Massilia	Pyrobaculum	0.022034	4	Brevundimonas
0.015635	9	Rivularia	0.020398	7	Roseiflexus	0.015417	13	Kitasatospora	0.017077	16	Alcanivorax	0.018063	18	Paracoccus				0.019395	8	Acidovorax	0.02103	7	Edwardsiella	0.018086	5	Trichodesmium	0.018964	16	0.010971	675	Haloquadratum	Leptotrichia	0.022034	4	Jonesia
0.015635	9	Lysinibacillus	0.020398	7	Enhygromyxa	0.015417	13	Thermococcus	0.017077	16	Lewinella	0.018063	18	Pyrobaculum				0.019395	8	Colwellia	0.02103	7	Desulfobulbus	0.018086	5	Ruminococcus	0.018964	16	0.010906	671	Ochrobactrum	Brevundimonas	0.022034	4	Syntrophus
0.015635	9	Arenimonas	0.020398	7	Nitrincola	0.015417	13	Arcobacter	0.017077	16	Marinimicrobium	0.018063	18	Acaryochloris				0.019395	8	Alicyclobacillus	0.02103	7	Pseudonocardia	0.018086	5	Listeria	0.018964	16	0.010906	671	Roseiflexus	Alcanivorax	0.022034	4	Tolumonas
0.013898	8	Bartonella	0.020398	7	Pontibacillus	0.015417	13	Brevundimonas	0.01601	15	Alteromonas	0.018063	18	Novosphingobium				0.019395	8	Brachyspira	0.02103	7	Methanococcus	0.018086	5	Sporolactobacillus	0.018964	16	0.010662	656	Helicobacter	Flexithrix	0.022034	4	Paenibacillus
0.013898	8	Chlorobium	0.020398	7	Thermogemmatispora	0.015417	13	Aureispira	0.01601	15	Yersinia	0.018063	18	Aureispira				0.019395	8	Brevundimonas	0.02103	7	Haloarcula	0.018086	5	Variovorax	0.018964	16	0.010597	652	Crinalium	Thioalkalivibrio	0.022034	4	Caloramator
0.013898	8	Fischerella	0.020398	7	Caballeronia	0.015417	13	Parabacteroides	0.01601	15	Bartonella	0.018063	18	Acidihalobacter				0.019395	8	Brevibacillus	0.02103	7	Geobacter	0.018086	5	Simkania	0.017779	15	0.010483	645	Dactylosporangium	Hyphomicrobium	0.022034	4	Devosia
0.013898	8	Microbispora	0.017484	6	Cellvibrio	0.015417	13	Candidatus Vecturithrix	0.01601	15	Brevibacterium	0.01706	17	Nostoc				0.019395	8	Frateuria	0.02103	7	Janthinobacterium	0.018086	5	Sorangium	0.017779	15	0.010467	644	Mesorhizobium	Saccharomonospora	0.022034	4	Mitsuokella
0.013898	8	Methanobrevibacter	0.017484	6	Caulobacter	0.014231	12	Hyphomicrobium	0.01601	15	Nocardioides	0.01706	17	Thermodesulfobacterium				0.019395	8	Asticcacaulis	0.02103	7	Leptotrichia	0.018086	5	Weissella	0.017779	15	0.010353	637	Pontibacillus	Methanobrevibacter	0.022034	4	Myxosarcina
0.013898	8	Halococcus	0.017484	6	Runella	0.014231	12	Achromobacter	0.01601	15	Microbispora	0.01706	17	Natrialba				0.019395	8	Anaeromyxobacter	0.02103	7	Actinokineospora	0.018086	5	Geitlerinema	0.017779	15	0.010337	636	Agrobacterium	Sulfolobus	0.022034	4	Polaromonas
0.013898	8	Magnetospirillum	0.017484	6	Isosphaera	0.014231	12	Cytophaga	0.01601	15	Sulfolobus	0.01706	17	Flexithrix	0.018152	8	Conexibacter	0.019395	8	Lysinibacillus	0.02103	7	Weissella	0.018086	5	Meiothermus	0.017779	15	0.010321	635	Cyanothece	Geobacter	0.022034	4	Ignicoccus
0.013898	8	Geobacter	0.017484	6	Alteromonas	0.014231	12	Spiroplasma	0.01601	15	Veillonella	0.01706	17	Candidatus Carsonella	0.018152	8	Haloquadratum	0.019395	8	Arenimonas	0.02103	7	Leucobacter	0.018086	5	Lewinella	0.017779	15	0.010288	633	Saccharomonospora	Sphingobacterium	0.022034	4	Glycomyces
0.013898	8	Marinomonas	0.017484	6	Aeromonas	0.014231	12	Marinomonas	0.01601	15	Actinoalloteichus	0.01706	17	Parabacteroides	0.018152	8	Fluviicola	0.019395	8	Blautia	0.02103	7	Bosea	0.018086	5	Parachlamydia	0.017779	15	0.010256	631	Chryseobacterium	Alicyclobacillus	0.022034	4	Spirillospora
0.013898	8	Kingella	0.017484	6	Haemophilus	0.014231	12	Janthinobacterium	0.01601	15	Flexithrix	0.016056	16	Caulobacter	0.018152	8	Parabacteroides	0.019395	8	Gilliamella	0.02103	7	Ruegeria	0.018086	5	Roseiflexus	0.017779	15	0.010158	625	Brevundimonas	Bosea	0.022034	4	Geitlerinema
0.013898	8	Exiguobacterium	0.017484	6	Nitrosomonas	0.014231	12	Weissella	0.01601	15	Cyanobacterium	0.016056	16	Haemophilus	0.018152	8	Catenulispora	0.016971	7	Gemmata	0.02103	7	Dyadobacter	0.018086	5	Novosphingobium	0.017779	15	0.010142	624	Cyanobium	Anaeromyxobacter	0.022034	4	Meiothermus
0.013898	8	Kutzneria	0.017484	6	Capnocytophaga	0.014231	12	Halorubrum	0.01601	15	Anaerococcus	0.016056	16	Thiomicrospira	0.018152	8	Coleofasciculus	0.016971	7	Photobacterium	0.02103	7	Cyanobium	0.018086	5	Methanocaldococcus	0.017779	15	0.009963	613	Ruminococcus	Conexibacter	0.022034	4	Macrococcus
0.013898	8	Thioalkalivibrio	0.017484	6	Erythrobacter	0.014231	12	Natrialba	0.01601	15	Candidatus Accumulibacter	0.016056	16	Methanosarcina	0.018152	8	Acidihalobacter	0.016971	7	Chlorobium	0.02103	7	Salinispora	0.018086	5	Sulfurimonas	0.017779	15	0.009931	611	Comamonas	Endozoicomonas	0.022034	4	Gracilibacillus
0.013898	8	Roseomonas	0.017484	6	Anabaena	0.014231	12	Flexithrix	0.01601	15	Ktedonobacter	0.016056	16	Colwellia	0.018152	8	Caballeronia	0.016971	7	Desulfotomaculum	0.02103	7	Parabacteroides	0.018086	5	Algoriphagus	0.016593	14	0.009768	601	Meiothermus	Cystobacter	0.022034	4	Halothece
0.013898	8	Microvirga	0.017484	6	Prochlorothrix	0.014231	12	Gloeocapsa	0.01601	15	Parabacteroides	0.016056	16	Ferroglobus	0.015883	7	Lysobacter	0.016971	7	Clavibacter	0.02103	7	Lysinibacillus	0.018086	5	Rhodopirellula	0.016593	14	0.009524	586	Glaciecola	Enterobacter	0.022034	4	Buttiauxella
0.013898	8	Methylohalobius	0.017484	6	Staphylococcus	0.014231	12	Bacteriovorax	0.01601	15	Arenimonas	0.016056	16	Actinoalloteichus	0.015883	7	Leptospirillum	0.016971	7	Listeria	0.02103	7	Catenulispora	0.018086	5	Candidatus Jettenia	0.016593	14	0.009508	585	Moorea	Janthinobacterium	0.022034	4	Pseudoxanthomonas
0.013898	8	Candidatus Solibacter	0.017484	6	Clavibacter	0.014231	12	Massilia	0.014943	14	Hyphomicrobium	0.016056	16	Cyclobacterium	0.015883	7	Comamonas	0.016971	7	Brevibacterium	0.02103	7	Blautia	0.018086	5	Aureispira	0.016593	14	0.009459	582	Pectobacterium	Blastococcus	0.022034	4	Pedobacter
0.013898	8	Candidatus Jettenia	0.017484	6	Streptosporangium	0.014231	12	Arenibacter	0.014943	14	Borrelia	0.016056	16	Asticcacaulis	0.015883	7	Haemophilus	0.016971	7	Microbispora	0.02103	7	Granulicella	0.018086	5	Rivularia	0.016593	14	0.009362	576	Thermosynechococcus	Ferroglobus	0.022034	4	Marichromatium
0.013898	8	Ktedonobacter	0.017484	6	Sulfolobus	0.014231	12	Rivularia	0.014943	14	Actinomadura	0.016056	16	Alkaliphilus	0.015883	7	Rickettsia	0.016971	7	Acholeplasma	0.018026	6	Lysobacter	0.018086	5	Parabacteroides	0.016593	14	0.009329	574	Trichodesmium	Anaerococcus	0.016525	3	Bosea
0.013898	8	Coleofasciculus	0.017484	6	Haliscomenobacter	0.013046	11	Gemmata	0.014943	14	Carnobacterium	0.016056	16	Anaeromyxobacter	0.015883	7	Fusobacterium	0.016971	7	Halococcus	0.018026	6	Methylocystis	0.018086	5	Thermogemmatispora	0.016593	14	0.009264	570	Flexithrix	Plesiocystis	0.016525	3	Modestobacter
0.01216	7	Gemmata	0.017484	6	Verrucomicrobium	0.013046	11	Borrelia	0.014943	14	Colwellia	0.016056	16	Oceanobacillus	0.015883	7	Rhodopseudomonas	0.016971	7	Arcobacter	0.018026	6	Methylosinus	0.018086	5	Desulfatiglans	0.016593	14	0.009215	567	Carboxydothermus	Algoriphagus	0.016525	3	Collinsella
0.01216	7	Alteromonas	0.017484	6	Janthinobacterium	0.013046	11	Haemophilus	0.014943	14	Exiguobacterium	0.016056	16	Candidatus Solibacter	0.015883	7	Leuconostoc	0.016971	7	Marinomonas	0.018026	6	Citrobacter	0.018086	5	Acidihalobacter	0.015408	13	0.009004	554	Rhodovulum	Gemmata	0.016525	3	Ensifer
0.01216	7	Agrobacterium	0.017484	6	Leptotrichia	0.013046	11	Bartonella	0.014943	14	Brevundimonas	0.016056	16	Marinimicrobium	0.015883	7	Listeria	0.016971	7	Thauera	0.018026	6	Nitrosomonas	0.018086	5	Caballeronia	0.015408	13	0.008972	552	Saccharothrix	Brevibacterium	0.016525	3	Thioalkalivibrio
0.01216	7	Alcaligenes	0.017484	6	Cyanothece	0.013046	11	Thiomicrospira	0.014943	14	Polaribacter	0.015053	15	Hyphomicrobium	0.015883	7	Microbispora	0.016971	7	Sporichthya	0.018026	6	Thiothrix	0.014469	4	Cellvibrio	0.015408	13	0.008955	551	Halobacterium	Micromonospora	0.016525	3	Anaerovorax
0.01216	7	Photobacterium	0.017484	6	Weissella	0.013046	11	Rhodopseudomonas	0.014943	14	Halorubrum	0.015053	15	Psychrobacter	0.015883	7	Methanobrevibacter	0.016971	7	Dactylosporangium	0.018026	6	Rhodopseudomonas	0.014469	4	Cystobacter	0.015408	13	0.00889	547	Aureispira	Colwellia	0.016525	3	Acidithiobacillus
0.01216	7	Microscilla	0.017484	6	Rheinheimera	0.013046	11	Clavibacter	0.014943	14	Gracilibacillus	0.015053	15	Yersinia	0.015883	7	Archaeoglobus	0.016971	7	Blastococcus	0.018026	6	Chloroflexus	0.014469	4	Hyphomonas	0.015408	13	0.008874	546	Lachnoclostridium	Marinomonas	0.016525	3	Roseomonas
0.01216	7	Erythrobacter	0.017484	6	Cyclobacterium	0.013046	11	Pseudonocardia	0.014943	14	Asticcacaulis	0.015053	15	Selenomonas	0.015883	7	Sulfolobus	0.016971	7	Microbulbifer	0.018026	6	Microcystis	0.014469	4	Alteromonas	0.015408	13	0.008858	545	Hyphomonas	Brachybacterium	0.016525	3	Geobacillus
0.01216	7	Rhodopseudomonas	0.017484	6	Bosea	0.013046	11	Micromonospora	0.014943	14	Massilia	0.015053	15	Listeria	0.015883	7	Marinomonas	0.016971	7	Ralstonia	0.018026	6	Prochlorothrix	0.014469	4	Xanthomonas	0.015408	13	0.008614	530	Pseudonocardia	Halobacillus	0.016525	3	Starkeya
0.01216	7	Nostoc	0.017484	6	Modestobacter	0.013046	11	Sulfolobus	0.014943	14	Acaryochloris	0.015053	15	Verrucomicrobium	0.015883	7	Rahnella	0.016971	7	Geitlerinema	0.018026	6	Lactococcus	0.014469	4	Agrobacterium	0.015408	13	0.008598	529	Actinokineospora	Weissella	0.016525	3	Acaryochloris
0.01216	7	Spiroplasma	0.017484	6	Glaciecola	0.013046	11	Alicyclobacillus	0.014943	14	Candidatus Solibacter	0.015053	15	Marinobacter	0.015883	7	Sporichthya	0.016971	7	Cyclobacterium	0.018026	6	Clavibacter	0.014469	4	Erwinia	0.015408	13	0.008549	526	Corallococcus	Cyclobacterium	0.016525	3	Sphingobium
0.01216	7	Methanosarcina	0.017484	6	Cyanobacterium	0.013046	11	Exiguobacterium	0.013875	13	Psychrobacter	0.015053	15	Magnetospirillum	0.015883	7	Blastococcus	0.016971	7	Pseudoxanthomonas	0.018026	6	Microbispora	0.014469	4	Xenorhabdus	0.015408	13	0.008468	521	Plesiocystis	Glaciecola	0.016525	3	Gemmatimonas
0.01216	7	Gardnerella	0.017484	6	Cupriavidus	0.013046	11	Brachybacterium	0.013875	13	Aeromonas	0.015053	15	Leptotrichia	0.015883	7	Stenotrophomonas	0.016971	7	Hymenobacter	0.018026	6	Spiroplasma	0.014469	4	Haemophilus	0.015408	13	0.008419	518	Natrinema	Bacteriovorax	0.016525	3	Smithella
0.01216	7	Marinobacter	0.017484	6	Granulicatella	0.013046	11	Halobacillus	0.013875	13	Haemophilus	0.015053	15	Stenotrophomonas	0.015883	7	Kutzneria	0.016971	7	Salinispora	0.018026	6	Methanosarcina	0.014469	4	Rickettsia	0.015408	13	0.008338	513	Pedobacter	Acaryochloris	0.016525	3	Varibaculum
0.01216	7	Acidovorax	0.017484	6	Idiomarina	0.013046	11	Psychromonas	0.013875	13	Desulfobulbus	0.015053	15	Brevundimonas	0.015883	7	Halorubrum	0.016971	7	Arenibacter	0.018026	6	Thermofilum	0.014469	4	Thiomicrospira	0.015408	13	0.008256	508	Enterobacter	Peptoniphilus	0.016525	3	Geoglobus
0.01216	7	Arcobacter	0.017484	6	Novosphingobium	0.013046	11	Glaciecola	0.013875	13	Thiomicrospira	0.015053	15	Kutzneria	0.015883	7	Natrialba	0.016971	7	Dyella	0.018026	6	Lachnospira	0.014469	4	Ehrlichia	0.015408	13	0.00824	507	Desulfosporosinus	Novosphingobium	0.016525	3	Conexibacter
0.01216	7	Stenotrophomonas	0.017484	6	Gemmatimonas	0.013046	11	Cupriavidus	0.013875	13	Saccharomonospora	0.015053	15	Weissella	0.015883	7	Pseudoxanthomonas	0.016971	7	Rhodopirellula	0.018026	6	Alicyclobacillus	0.014469	4	Bdellovibrio	0.015408	13	0.008175	503	Microcoleus	Marinimicrobium	0.016525	3	Alicycliphilus
0.01216	7	Ralstonia	0.017484	6	Kribbella	0.013046	11	Dyadobacter	0.013875	13	Micromonospora	0.015053	15	Polaromonas	0.015883	7	Dyadobacter	0.016971	7	Hoeflea	0.018026	6	Kingella	0.014469	4	Chlorobium	0.015408	13	0.008094	498	Neisseria	Rivularia	0.016525	3	Dickeya
0.01216	7	Aneurinibacillus	0.017484	6	Plesiocystis	0.01186	10	Chondromyces	0.013875	13	Methanobrevibacter	0.015053	15	Halorubrum	0.015883	7	Knoellia	0.016971	7	Haloquadratum	0.018026	6	Kineococcus	0.014469	4	Lactococcus	0.015408	13	0.007948	489	Lewinella	Blautia	0.016525	3	Enhygromyxa
0.01216	7	Pedobacter	0.017484	6	Lentisphaera	0.01186	10	Caulobacter	0.013875	13	Methanococcus	0.015053	15	Sulfurospirillum	0.015883	7	Bacteriovorax	0.016971	7	Candidatus Solibacter	0.018026	6	Exiguobacterium	0.014469	4	Eubacterium	0.014223	12	0.007931	488	Enorma	Caulobacter	0.016525	3	Streptacidiphilus
0.01216	7	Cellulophaga	0.017484	6	Candidatus Accumulibacter	0.01186	10	Bordetella	0.013875	13	Marinobacter	0.015053	15	Geitlerinema	0.015883	7	Salinispora	0.016971	7	Aureimonas	0.018026	6	Variovorax	0.014469	4	Micromonospora	0.014223	12	0.00785	483	Novosphingobium	Thiomicrospira	0.016525	3	Hydrocarboniphaga
0.01216	7	Dyadobacter	0.017484	6	Candidatus Solibacter	0.01186	10	Citrobacter	0.013875	13	Magnetospirillum	0.015053	15	Rheinheimera	0.015883	7	Gemmatimonas	0.016971	7	Schlesneria	0.018026	6	Blastococcus	0.014469	4	Methanobrevibacter	0.014223	12	0.007834	482	Lysobacter	Microscilla	0.016525	3	Nitrincola
0.01216	7	Massilia	0.017484	6	Rivularia	0.01186	10	Xenorhabdus	0.013875	13	Marinomonas	0.015053	15	Cellulophaga	0.015883	7	Candidatus Pelagibacter	0.014547	6	Lysobacter	0.018026	6	Kutzneria	0.014469	4	Methanococcus	0.014223	12	0.007801	480	Marmoricola	Erythrobacter	0.016525	3	Thermincola
0.01216	7	Anoxybacillus	0.017484	6	Arenimonas	0.01186	10	Rickettsia	0.013875	13	Janthinobacterium	0.015053	15	Plesiocystis	0.015883	7	Enhygromyxa	0.014547	6	Hyphomicrobium	0.018026	6	Brachybacterium	0.014469	4	Methanosarcina	0.014223	12	0.00746	459	Kineococcus	Chloroflexus	0.016525	3	Citreicella
0.01216	7	Hahella	0.017484	6	Zavarzinella	0.01186	10	Trichodesmium	0.013875	13	Buchnera	0.015053	15	Arenimonas	0.015883	7	Gillisia	0.014547	6	Azospirillum	0.018026	6	Moritella	0.014469	4	Halobacterium	0.014223	12	0.00746	459	Richelia	Thermodesulfobacterium	0.016525	3	Segniliparus
0.01216	7	Novosphingobium	0.017484	6	Coleofasciculus	0.01186	10	Sporolactobacillus	0.013875	13	Brachybacterium	0.014049	14	Bordetella	0.015883	7	Hoeflea	0.014547	6	Comamonas	0.018026	6	Psychromonas	0.014469	4	Thermococcus	0.014223	12	0.007444	458	Bosea	Acholeplasma	0.016525	3	Aquimarina
0.01216	7	Dyella	0.017484	6	Paraglaciecola	0.01186	10	Verrucomicrobium	0.013875	13	Pleurocapsa	0.014049	14	Bdellovibrio	0.015883	7	Lysinibacillus	0.014547	6	Edwardsiella	0.018026	6	Desulfosporosinus	0.014469	4	Pyrobaculum	0.014223	12	0.007151	440	Caldicellulosiruptor	Pyrococcus	0.016525	3	Advenella
0.01216	7	Nitrincola	0.01457	5	Achromobacter	0.01186	10	Carnobacterium	0.013875	13	Cyclobacterium	0.014049	14	Chloroflexus	0.015883	7	Solimonas	0.014547	6	Desulfobulbus	0.018026	6	Natrinema	0.014469	4	Methanoplanus	0.014223	12	0.007103	437	Spirulina	Halanaerobium	0.016525	3	Haloquadratum
0.01216	7	Labrenzia	0.01457	5	Psychrobacter	0.01186	10	Buchnera	0.013875	13	Glaciecola	0.014049	14	Pseudonocardia	0.015883	7	Arenimonas	0.014547	6	Ehrlichia	0.018026	6	Hymenobacter	0.014469	4	Desulfomonile	0.014223	12	0.007103	437	Hymenobacter	Ralstonia	0.016525	3	Turneriella
0.01216	7	Syntrophorhabdus	0.01457	5	Desulfococcus	0.01186	10	Caldicellulosiruptor	0.013875	13	Geobacillus	0.014049	14	Actinomadura	0.015883	7	Paraprevotella	0.014547	6	Capnocytophaga	0.018026	6	Cellulophaga	0.014469	4	Azoarcus	0.014223	12	0.007086	436	Staphylococcus	Methylopila	0.016525	3	Salimicrobium
0.01216	7	Methanocella	0.01457	5	Thiomicrospira	0.01186	10	Ralstonia	0.013875	13	Oceanobacillus	0.014049	14	Spiroplasma	0.015883	7	Schlesneria	0.014547	6	Chloroflexus	0.018026	6	Leifsonia	0.014469	4	Marinomonas	0.014223	12	0.006989	430	Marinobacter	Cyanobacterium	0.016525	3	Halostagnicola
0.010423	6	Runella	0.01457	5	Cytophaga	0.01186	10	Thiorhodococcus	0.013875	13	Plesiocystis	0.014049	14	Halanaerobium	0.015883	7	Rudaea	0.014547	6	Pseudanabaena	0.018026	6	Massilia	0.014469	4	Sporichthya	0.014223	12	0.006972	429	Nocardioides	Acidithiobacillus	0.016525	3	Candidatus Jettenia
0.010423	6	Borrelia	0.01457	5	Porphyrobacter	0.01186	10	Moritella	0.013875	13	Haloquadratum	0.014049	14	Carnobacterium	0.015883	7	Granulicella	0.014547	6	Spiroplasma	0.018026	6	Kribbella	0.014469	4	Nitrosospira	0.014223	12	0.006972	429	Microvirga	Caldithrix	0.016525	3	Desulfurispirillum
0.010423	6	Xanthomonas	0.01457	5	Nostoc	0.01186	10	Parachlamydia	0.013875	13	Rivularia	0.014049	14	Marinomonas	0.015883	7	Moorea	0.014547	6	Archaeoglobus	0.018026	6	Candidatus Solibacter	0.014469	4	Nitrospina	0.014223	12	0.006891	424	Arthrospira	Candidatus Solibacter	0.016525	3	Mucilaginibacter
0.010423	6	Bordetella	0.01457	5	Lactococcus	0.01186	10	Geobacillus	0.013875	13	Echinicola	0.014049	14	Thermodesulfovibrio	0.013614	6	Azorhizobium	0.014547	6	Haloarcula	0.018026	6	Marinimicrobium	0.014469	4	Caldicellulosiruptor	0.014223	12	0.006859	422	Terribacillus	Candidatus Jettenia	0.016525	3	Desulfurivibrio
0.010423	6	Haemophilus	0.01457	5	Listeria	0.01186	10	Acaryochloris	0.013875	13	Oscillibacter	0.014049	14	Exiguobacterium	0.013614	6	Herpetosiphon	0.014547	6	Halobacterium	0.018026	6	Thermogemmatispora	0.014469	4	Rheinheimera	0.014223	12	0.006761	416	Fusobacterium	Aureispira	0.016525	3	Eudoraea
0.010423	6	Megasphaera	0.01457	5	Nocardioides	0.01186	10	Fulvivirga	0.013875	13	Labrenzia	0.014049	14	Microcoleus	0.013614	6	Spirosoma	0.014547	6	Thermofilum	0.018026	6	Alloprevotella	0.014469	4	Mesorhizobium	0.014223	12	0.006745	415	Herbaspirillum	Arenimonas	0.016525	3	Singulisphaera
0.010423	6	Thiomicrospira	0.01457	5	Pseudonocardia	0.01186	10	Nitrososphaera	0.013875	13	Candidatus Vecturithrix	0.014049	14	Halobacillus	0.013614	6	Gemmata	0.014547	6	Desulfobacter	0.018026	6	Candidatus Vecturithrix	0.014469	4	Pseudoxanthomonas	0.014223	12	0.006615	407	Granulicatella	Candidatus Vecturithrix	0.016525	3	Labrenzia
0.010423	6	Pseudanabaena	0.01457	5	Acholeplasma	0.01186	10	Caballeronia	0.012808	12	Cellvibrio	0.014049	14	Polaribacter	0.013614	6	Methylocystis	0.014547	6	Halanaerobium	0.015021	5	Azorhizobium	0.014469	4	Bosea	0.013038	11	0.00642	395	Anaeromyxobacter	Runella	0.016525	3	Nitrososphaera
0.010423	6	Cellulomonas	0.01457	5	Methanococcus	0.010674	9	Leptospirillum	0.012808	12	Runella	0.014049	14	Corallococcus	0.013614	6	Gluconobacter	0.014547	6	Verrucomicrobium	0.015021	5	Pelobacter	0.014469	4	Natrinema	0.013038	11	0.006371	392	Nitratireductor	Borrelia	0.016525	3	Candidatus Korarchaeum
0.010423	6	Thermoanaerobacter	0.01457	5	Methanocorpusculum	0.010674	9	Alteromonas	0.012808	12	Gemmata	0.014049	14	Gillisia	0.013614	6	Chromobacterium	0.014547	6	Azoarcus	0.015021	5	Herpetosiphon	0.014469	4	Glaciecola	0.013038	11	0.006355	391	Chondromyces	Alteromonas	0.016525	3	Sediminibacterium
0.010423	6	Actinomadura	0.01457	5	Acidianus	0.010674	9	Gluconobacter	0.012808	12	Leptospirillum	0.014049	14	Endozoicomonas	0.013614	6	Erwinia	0.014547	6	Geobacter	0.015021	5	Gemmata	0.014469	4	Cellulophaga	0.013038	11	0.006339	390	Azorhizobium	Methylosinus	0.016525	3	Rubidibacter
0.010423	6	Leptotrichia	0.01457	5	Colwellia	0.010674	9	Providencia	0.012808	12	Cytophaga	0.013046	13	Borrelia	0.013614	6	Desulfobulbus	0.014547	6	Veillonella	0.015021	5	Isosphaera	0.014469	4	Bacteriovorax	0.013038	11	0.006192	381	Methanothermococcus	Psychrobacter	0.016525	3	Oceanibaculum
0.010423	6	Thauera	0.01457	5	Thermodesulfovibrio	0.010674	9	Roseburia	0.012808	12	Thiothrix	0.013046	13	Leptospirillum	0.013614	6	Thiomicrospira	0.014547	6	Thiomonas	0.015021	5	Achromobacter	0.014469	4	Acaryochloris	0.013038	11	0.006192	381	Nodosilinea	Aeromonas	0.016525	3	Salinarimonas
0.010423	6	Variovorax	0.01457	5	Alicyclobacillus	0.010674	9	Desulfobulbus	0.012808	12	Acholeplasma	0.013046	13	Methylosinus	0.013614	6	Cytophaga	0.014547	6	Gloeobacter	0.015021	5	Beijerinckia	0.014469	4	Nodularia	0.013038	11	0.006176	380	Chelonobacter	Bdellovibrio	0.016525	3	Caldisericum
0.010423	6	Nitrosospira	0.01457	5	Dactylosporangium	0.010674	9	Anabaena	0.012808	12	Variovorax	0.013046	13	Erwinia	0.013614	6	Chloroflexus	0.014547	6	Catenuloplanes	0.015021	5	Aeromonas	0.014469	4	Haliangium	0.013038	11	0.00616	379	Roseovarius	Nostoc	0.016525	3	Sulfuricella
0.010423	6	Caldicellulosiruptor	0.01457	5	Actinokineospora	0.010674	9	Listeria	0.012808	12	Blattabacterium	0.013046	13	Thiothrix	0.013614	6	Calothrix	0.014547	6	Variovorax	0.015021	5	Photobacterium	0.014469	4	Peptoniphilus	0.013038	11	0.006144	378	Serratia	Magnetospirillum	0.016525	3	Deferrisoma
0.010423	6	Polaromonas	0.01457	5	Salinicoccus	0.010674	9	Brevibacterium	0.012808	12	Weissella	0.013046	13	Brevibacterium	0.013614	6	Prochlorothrix	0.014547	6	Simkania	0.015021	5	Haemophilus	0.014469	4	Sphingobium	0.013038	11	0.006111	376	Campylobacter	Blattabacterium	0.016525	3	Polycyclovorans
0.010423	6	Sulfurospirillum	0.01457	5	Ralstonia	0.010674	9	Thermodesulfobacterium	0.012808	12	Ralstonia	0.013046	13	Gloeobacter	0.013614	6	Lactococcus	0.014547	6	Stenotrophomonas	0.015021	5	Bdellovibrio	0.014469	4	Sphingopyxis	0.013038	11	0.006095	375	Blastococcus	Desulfitobacterium	0.016525	3	Kandleria
0.010423	6	Moritella	0.01457	5	Thiorhodococcus	0.010674	9	Microtetraspora	0.012808	12	Psychromonas	0.013046	13	Desulfitobacterium	0.013614	6	Brevibacterium	0.014547	6	Kutzneria	0.015021	5	Afipia	0.014469	4	Salinisphaera	0.013038	11	0.006095	375	Desulfonatronum	Kutzneria	0.016525	3	Alloprevotella
0.010423	6	Meiothermus	0.01457	5	Sulfitobacter	0.010674	9	Microbispora	0.012808	12	Haliangium	0.013046	13	Brachybacterium	0.013614	6	Micromonospora	0.014547	6	Microcoleus	0.015021	5	Rhodospirillum	0.014469	4	Oceanobacillus	0.013038	11	0.006062	373	Salimicrobium	Pleurocapsa	0.016525	3	Candidatus Latescibacter
0.010423	6	Psychromonas	0.01457	5	Psychromonas	0.010674	9	Pyrococcus	0.012808	12	Novosphingobium	0.013046	13	Marinobacterium	0.013614	6	Microtetraspora	0.014547	6	Pleurocapsa	0.015021	5	Chlorobium	0.014469	4	Dorea	0.013038	11	0.006062	373	Gorillibacterium	Leucobacter	0.016525	3	Tyzzerella
0.010423	6	Lewinella	0.01457	5	Parachlamydia	0.010674	9	Methanoplanus	0.012808	12	Arenibacter	0.013046	13	Hippea	0.013614	6	Sporolactobacillus	0.014547	6	Polaromonas	0.015021	5	Eubacterium	0.014469	4	Desulfonauticus	0.013038	11	0.006046	372	Pantoea	Gloeocapsa	0.016525	3	Candidatus Paracaedibacter
0.010423	6	Duganella	0.01457	5	Phaeospirillum	0.010674	9	Veillonella	0.012808	12	Sulfurimonas	0.013046	13	Glaciecola	0.013614	6	Halobacterium	0.014547	6	Leucobacter	0.015021	5	Sporolactobacillus	0.014469	4	Caldilinea	0.013038	11	0.006014	370	Geodermatophilus	Alkaliphilus	0.016525	3	Phaeodactylibacter
0.010423	6	Virgibacillus	0.01457	5	Gloeocapsa	0.010674	9	Photorhabdus	0.012808	12	Gillisia	0.013046	13	Conexibacter	0.013614	6	Verrucomicrobium	0.014547	6	Halorubrum	0.015021	5	Methanobacterium	0.014469	4	Nitratireductor	0.013038	11	0.005997	369	Dethiosulfovibrio	Kribbella	0.016525	3	Siccibacter
0.010423	6	Bosea	0.01457	5	Alkaliphilus	0.010674	9	Gloeobacter	0.012808	12	Aureispira	0.012042	12	Alteromonas	0.013614	6	Azoarcus	0.014547	6	Sulfitobacter	0.015021	5	Roseobacter	0.014469	4	Oribacterium	0.013038	11	0.005965	367	Verrucomicrobium	Oceanobacillus	0.016525	3	Oleiagrimonas
0.010423	6	Glaciecola	0.01457	5	Knoellia	0.010674	9	Stenotrophomonas	0.011741	11	Lysobacter	0.012042	12	Providencia	0.013614	6	Geobacter	0.014547	6	Nevskia	0.015021	5	Verrucomicrobium	0.014469	4	Hoeflea	0.013038	11	0.0059	363	Coleofasciculus	Maribacter	0.016525	3
0.010423	6	Actinopolymorpha	0.01457	5	Anoxybacillus	0.010674	9	Leucobacter	0.011741	11	Azospirillum	0.012042	12	Actinobacillus	0.013614	6	Brachyspira	0.014547	6	Flexithrix	0.015021	5	Thermodesulfovibrio	0.014469	4	Pontibacillus	0.013038	11	0.00577	355	Leucobacter	Pontibacillus	0.016525	3	Viruses
0.010423	6	Idiomarina	0.01457	5	Acaryochloris	0.010674	9	Sulfurospirillum	0.011741	11	Achromobacter	0.012042	12	Pseudanabaena	0.013614	6	Thiomonas	0.014547	6	Roseovarius	0.015021	5	Sphingobacterium	0.014469	4	Candidatus Solibacter	0.013038	11	0.005754	354	Variovorax	Advenella	0.016525	3	cannot be assigned to a genus
0.010423	6	Haliangium	0.01457	5	Maribacter	0.010674	9	Geitlerinema	0.011741	11	Paracoccus	0.012042	12	Anabaena	0.013614	6	Thauera	0.014547	6	Bosea	0.015021	5	Catenuloplanes	0.014469	4	Marinimicrobium	0.013038	11	0.005721	352	Desulfotomaculum	Methyloversatilis	0.016525	3
0.010423	6	Gemmatimonas	0.01457	5	Leeuwenhoekiella	0.010674	9	Cellulophaga	0.011741	11	Chlorobium	0.012042	12	Sporosarcina	0.013614	6	Gloeobacter	0.014547	6	Marmoricola	0.015021	5	Stenotrophomonas	0.014469	4	Actinomycetospora	0.013038	11	0.005705	351	Asticcacaulis	Labrenzia	0.016525	3	unclassified
0.010423	6	Candidatus Pelagibacter	0.01457	5	Aquimarina	0.010674	9	Candidatus Carsonella	0.011741	11	Nostoc	0.012042	12	Sporolactobacillus	0.013614	6	Exiguobacterium	0.014547	6	Idiomarina	0.015021	5	Microbulbifer	0.014469	4	Alloscardovia	0.013038	11	0.005705	351	Salsuginibacillus	Zavarzinella	0.016525	3
0.010423	6	Mastigocladopsis	0.01457	5	Chthoniobacter	0.010674	9	Alkaliphilus	0.011741	11	Gemella	0.012042	12	Methanoplanus	0.013614	6	Simkania	0.014547	6	Anoxybacillus	0.015021	5	Marinobacterium	0.014469	4	Desulfarculus	0.013038	11	0.005672	349	Carnobacterium	Granulicella	0.016525	3
0.010423	6	Belliella	0.01457	5	Endozoicomonas	0.010674	9	Acidithiobacillus	0.011741	11	Cellulomonas	0.012042	12	Photorhabdus	0.013614	6	Dietzia	0.014547	6	Plesiocystis	0.015021	5	Salinivibrio	0.014469	4	Paraprevotella	0.011852	10	0.005575	343	Kutzneria	Gluconobacter	0.016525	3
0.010423	6	Grimontia	0.01457	5	Terriglobus	0.010674	9	Gemmatimonas	0.011741	11	Thermoanaerobacter	0.012042	12	Variovorax	0.013614	6	Actinosynnema	0.014547	6	Chamaesiphon	0.015021	5	Polaromonas	0.014469	4	Sciscionella	0.011852	10	0.005542	341	Thioalkalivibrio	Providencia	0.016525	3
0.010423	6	Algoriphagus	0.01457	5	Balneola	0.010674	9	Nitrincola	0.011741	11	Haloarcula	0.012042	12	Blattabacterium	0.013614	6	Microcoleus	0.014547	6	Algoriphagus	0.015021	5	Cylindrospermum	0.014469	4	Coleofasciculus	0.011852	10	0.005461	336	Enhygromyxa	Actinobacillus	0.016525	3
0.010423	6	Lentisphaera	0.01457	5	Nitrososphaera	0.010674	9	Marinimicrobium	0.011741	11	Haloferax	0.012042	12	Caldicellulosiruptor	0.013614	6	Halobacillus	0.014547	6	Methyloversatilis	0.015021	5	Sulfurospirillum	0.014469	4	Alloprevotella	0.011852	10	0.005396	332	Micromonospora	Haemophilus	0.016525	3
0.010423	6	Sulfuricurvum	0.01457	5	Haloferula	0.010674	9	Oscillibacter	0.011741	11	Leucobacter	0.012042	12	Pleurocapsa	0.013614	6	Weissella	0.014547	6	Labrenzia	0.015021	5	Methylopila	0.014469	4	Kallipyga	0.011852	10	0.005396	332	Aurantimonas	Rhodopseudomonas	0.016525	3
0.010423	6	Marinimicrobium	0.01457	5	Sciscionella	0.010674	9	Arenimonas	0.011741	11	Geitlerinema	0.012042	12	Psychromonas	0.013614	6	Devosia	0.014547	6	Hellea	0.015021	5	Geitlerinema	0.014469	4	Planctopirus	0.011852	10	0.005396	332	Cellulosilyticum	Microcystis	0.016525	3
0.010423	6	Belnapia	0.01457	5	Schlesneria	0.010674	9	Alloprevotella	0.011741	11	Pseudoxanthomonas	0.012042	12	Virgibacillus	0.013614	6	Kineosporia	0.014547	6	Rudaea	0.015021	5	Cyclobacterium	0.014469	4	Candidatus Vecturithrix	0.011852	10	0.00538	331	Spirosoma	Synechocystis	0.016525	3
0.010423	6	Zunongwangia	0.01457	5	Alloprevotella	0.010674	9	Erysipelatoclostridium	0.011741	11	Candidatus Carsonella	0.012042	12	Bosea	0.013614	6	Ferroglobus	0.014547	6	Alloprevotella	0.015021	5	Rhodanobacter	0.010851	3	Myxococcus	0.011852	10	0.005331	328	Holdemania	Anabaena	0.016525	3
0.010423	6	Planctopirus	0.01457	5	Desulfatiglans	0.009488	8	Dictyoglomus	0.011741	11	Alkaliphilus	0.012042	12	Gloeocapsa	0.013614	6	Geitlerinema	0.012122	5	Francisella	0.015021	5	Corallococcus	0.010851	3	Stigmatella	0.011852	10	0.00525	323	Actinobacillus	Microbispora	0.016525	3
0.010423	6	Acidihalobacter	0.01457	5	Candidatus Rubidus	0.009488	8	Cystobacter	0.011741	11	Rhodopirellula	0.012042	12	Cyanobacterium	0.013614	6	Flexithrix	0.012122	5	Citrobacter	0.015021	5	Pseudoxanthomonas	0.010851	3	Caulobacter	0.011852	10	0.005217	321	Blastomonas	Spiroplasma	0.016525	3
0.008686	5	Stigmatella	0.01457	5	Clostridioides	0.009488	8	Runella	0.011741	11	Leeuwenhoekiella	0.012042	12	Geobacillus	0.013614	6	Aminomonas	0.012122	5	Erwinia	0.015021	5	Virgibacillus	0.010851	3	Leptospirillum	0.011852	10	0.005217	321	Meganema	Methanococcus	0.016525	3
0.008686	5	Leptospirillum	0.011656	4	Herpetosiphon	0.009488	8	Francisella	0.011741	11	Pontibacillus	0.012042	12	Chamaesiphon	0.013614	6	Marmoricola	0.012122	5	Serratia	0.015021	5	Verrucosispora	0.010851	3	Gluconobacter	0.011852	10	0.005185	319	Dyella	Haloferax	0.016525	3
0.008686	5	Achromobacter	0.011656	4	Hyphomicrobium	0.009488	8	Paracoccus	0.011741	11	Elizabethkingia	0.012042	12	Nitrincola	0.013614	6	Roseivivax	0.012122	5	Xenorhabdus	0.015021	5	Modestobacter	0.010851	3	Enterobacter	0.011852	10	0.005152	317	Nonlabens	Caldicellulosiruptor	0.016525	3
0.008686	5	Moraxella	0.011656	4	Methylosinus	0.009488	8	Erwinia	0.011741	11	Methyloversatilis	0.012042	12	Haloquadratum	0.013614	6	Cellulophaga	0.012122	5	Yersinia	0.015021	5	Cupriavidus	0.010851	3	Providencia	0.011852	10	0.005136	316	Desulfococcus	Brevibacillus	0.016525	3
0.008686	5	Acidiphilium	0.011656	4	Bordetella	0.009488	8	Microscilla	0.010673	10	Cystobacter	0.012042	12	Methylotenera	0.013614	6	Alkaliphilus	0.012122	5	Haemophilus	0.015021	5	Knoellia	0.010851	3	Photobacterium	0.011852	10	0.005087	313	Ferroglobus	Moritella	0.016525	3
0.008686	5	Enterobacter	0.011656	4	Chromobacterium	0.009488	8	Thiothrix	0.010673	10	Chondromyces	0.012042	12	Methanocella	0.013614	6	Peptoniphilus	0.012122	5	Pasteurella	0.015021	5	Sphingobium	0.010851	3	Actinobacillus	0.011852	10	0.005071	312	Marinomonas	Geitlerinema	0.016525	3
0.008686	5	Erwinia	0.011656	4	Citrobacter	0.009488	8	Microcystis	0.010673	10	Francisella	0.012042	12	Candidatus Vecturithrix	0.013614	6	Sphingobium	0.012122	5	Thiomicrospira	0.015021	5	Sphingopyxis	0.010851	3	Desulfuromonas	0.011852	10	0.005038	310	Intestinimonas	Actinoalloteichus	0.016525	3
0.008686	5	Proteus	0.011656	4	Yersinia	0.009488	8	Synechocystis	0.010673	10	Microscilla	0.011039	11	Francisella	0.013614	6	Plesiocystis	0.012122	5	Rhodobacter	0.015021	5	Candidatus Pelagibacter	0.010851	3	Desulfomicrobium	0.011852	10	0.004973	306	Fodinicurvata	Thermaerobacter	0.016525	3
0.008686	5	Serratia	0.011656	4	Photobacterium	0.009488	8	Pseudanabaena	0.010673	10	Erythrobacter	0.011039	11	Agrobacterium	0.013614	6	Jeotgalicoccus	0.012122	5	Rhodopseudomonas	0.015021	5	Caldilinea	0.010851	3	Megasphaera	0.011852	10	0.004925	303	Desulfuromonas	Cellulophaga	0.016525	3
0.008686	5	Actinobacillus	0.011656	4	Ehrlichia	0.009488	8	Prochlorothrix	0.010673	10	Pseudonocardia	0.011039	11	Citrobacter	0.013614	6	Algoriphagus	0.012122	5	Nitrospira	0.015021	5	Sulfuricurvum	0.010851	3	Hydrogenobacter	0.011852	10	0.004925	303	Selenomonas	Ensifer	0.016525	3
0.008686	5	Desulfobulbus	0.011656	4	Bdellovibrio	0.009488	8	Nitrosococcus	0.010673	10	Catenuloplanes	0.011039	11	Microscilla	0.013614	6	Candidatus Accumulibacter	0.012122	5	Thermodesulfobacterium	0.015021	5	Castellaniella	0.010851	3	Microscilla	0.011852	10	0.00486	299	Halobiforma	Roseomonas	0.016525	3
0.008686	5	Ehrlichia	0.011656	4	Afipia	0.009488	8	Sporosarcina	0.010673	10	Nitrospina	0.011039	11	Synechocystis	0.013614	6	Hamadaea	0.012122	5	Streptosporangium	0.015021	5	Aureispira	0.010851	3	Rhodopseudomonas	0.011852	10	0.004843	298	Weissella	Geobacillus	0.016525	3
0.008686	5	Afipia	0.011656	4	Rhodopseudomonas	0.009488	8	Streptosporangium	0.010673	10	Metallosphaera	0.011039	11	Nitrosococcus	0.013614	6	Candidatus Vecturithrix	0.012122	5	Methanobrevibacter	0.015021	5	Natranaerobius	0.010851	3	Porphyrobacter	0.011852	10	0.004811	296	Acidipropionibacterium	Dysgonomonas	0.016525	3
0.008686	5	Trichodesmium	0.011656	4	Rhodospirillum	0.009488	8	Acholeplasma	0.010673	10	Kutzneria	0.011039	11	Thermoanaerobacter	0.011345	5	Pirellula	0.012122	5	Photorhabdus	0.015021	5	Halopiger	0.010851	3	Nitrosococcus	0.011852	10	0.004795	295	Aromatoleum	Arenibacter	0.016525	3
0.008686	5	Brevibacterium	0.011656	4	Chloroflexus	0.009488	8	Halanaerobium	0.010673	10	Caldicellulosiruptor	0.011039	11	Micromonospora	0.011345	5	Alteromonas	0.012122	5	Neorickettsia	0.015021	5	Eudoraea	0.010851	3	Leuconostoc	0.011852	10	0.004778	294	Belnapia	Nitrincola	0.016525	3
0.008686	5	Pseudonocardia	0.011656	4	Microcystis	0.009488	8	Acidovorax	0.010673	10	Moritella	0.011039	11	Streptosporangium	0.011345	5	Serratia	0.012122	5	Bilophila	0.015021	5	Chelativorans	0.010851	3	Thermodesulfobacterium	0.011852	10	0.004746	292	Capnocytophaga	Leeuwenhoekiella	0.016525	3
0.008686	5	Actinopolyspora	0.011656	4	Pediococcus	0.009488	8	Desulfitobacterium	0.010673	10	Natrialba	0.011039	11	Microbispora	0.011345	5	Yersinia	0.012122	5	Marinobacterium	0.015021	5	Labrenzia	0.010851	3	Saccharopolyspora	0.011852	10	0.004648	286	Chlorobium	Prolixibacter	0.016525	3
0.008686	5	Saccharomonospora	0.011656	4	Halococcus	0.009488	8	Metallosphaera	0.010673	10	Rheinheimera	0.011039	11	Acholeplasma	0.011345	5	Desulfococcus	0.012122	5	Candidatus Arthromitus	0.015021	5	Arenimonas	0.010851	3	Pseudonocardia	0.011852	10	0.0046	283	Sulfurihydrogenibium	Schlesneria	0.016525	3
0.008686	5	Haloferax	0.011656	4	Haloferax	0.009488	8	Pleurocapsa	0.010673	10	Ruegeria	0.011039	11	Methanosaeta	0.011345	5	Oscillatoria	0.012122	5	Moritella	0.015021	5	Nitrososphaera	0.010851	3	Geodermatophilus	0.011852	10	0.0046	283	Thermogemmatispora	Alloprevotella	0.016525	3
0.008686	5	Verrucomicrobium	0.011656	4	Desulfobacter	0.009488	8	Actinoalloteichus	0.010673	10	Acidithiobacillus	0.011039	11	Archaeoglobus	0.011345	5	Actinopolyspora	0.012122	5	Glycomyces	0.015021	5	Zavarzinella	0.010851	3	Halococcus	0.011852	10	0.004583	282	Aeromonas	Paraglaciecola	0.016525	3
0.008686	5	Rhodoferax	0.011656	4	Methanoplanus	0.009488	8	Meiothermus	0.010673	10	Nitrincola	0.011039	11	Halococcus	0.011345	5	Acholeplasma	0.012122	5	Myroides	0.015021	5	Pedosphaera	0.010851	3	Natronobacterium	0.011852	10	0.004421	272	Hydrocarboniphaga	Clostridioides	0.016525	3
0.008686	5	Sphingobacterium	0.011656	4	Halanaerobium	0.009488	8	Roseovarius	0.010673	10	Thermogemmatispora	0.011039	11	Sulfolobus	0.011345	5	Halococcus	0.012122	5	Aminomonas	0.015021	5	Hamadaea	0.010851	3	Thermofilum	0.010667	9	0.004405	271	Natrialba	Isosphaera	0.011017	2
0.008686	5	Blattabacterium	0.011656	4	Sporomusa	0.009488	8	Rhodanobacter	0.010673	10	Pedosphaera	0.011039	11	Sebaldella	0.011345	5	Haliscomenobacter	0.012122	5	Corallococcus	0.015021	5	Desulfatiglans	0.010851	3	Desulfobacterium	0.010667	9	0.004356	268	Dictyoglomus	Desulfobulbus	0.011017	2
0.008686	5	Dactylosporangium	0.011656	4	Acidovorax	0.009488	8	Roseomonas	0.010673	10	Planctopirus	0.011039	11	Candidatus Phytoplasma	0.011345	5	Colwellia	0.012122	5	Phaeospirillum	0.015021	5	Paraglaciecola	0.010851	3	Halanaerobium	0.010667	9	0.004356	268	Bartonella	Nitrosomonas	0.011017	2
0.008686	5	Arthrospira	0.011656	4	Azoarcus	0.009488	8	Aequorivita	0.010673	10	Clostridioides	0.011039	11	Simkania	0.011345	5	Veillonella	0.012122	5	Natrinema	0.012017	4	Francisella	0.010851	3	Rhodoferax	0.010667	9	0.004307	265	Bordetella	Cytophaga	0.011017	2
0.008686	5	Desulfitobacterium	0.011656	4	Lachnospira	0.009488	8	Hahella	0.010673	10	Sediminispirochaeta	0.011039	11	Methylophaga	0.011345	5	Sebaldella	0.012122	5	Ruegeria	0.012017	4	Xanthobacter	0.010851	3	Thermoanaerobacterium	0.010667	9	0.004258	262	Chromohalobacter	Trichodesmium	0.011017	2
0.008686	5	Candidatus Microthrix	0.011656	4	Marinomonas	0.009488	8	Sulfurimonas	0.009606	9	Beijerinckia	0.011039	11	Devosia	0.011345	5	Variovorax	0.012122	5	Collinsella	0.012017	4	Comamonas	0.010851	3	Photorhabdus	0.010667	9	0.004226	260	Hyphomicrobium	Listeria	0.011017	2
0.008686	5	Devosia	0.011656	4	Natronococcus	0.009488	8	Enhygromyxa	0.009606	9	Citrobacter	0.011039	11	Kocuria	0.011345	5	Dactylosporangium	0.012122	5	Candidatus Carsonella	0.012017	4	Gluconobacter	0.010851	3	Rhodothermus	0.010667	9	0.004226	260	Singulisphaera	Saccharopolyspora	0.011017	2
0.008686	5	Ferroglobus	0.011656	4	Brachyspira	0.009488	8	Gillisia	0.009606	9	Saccharopolyspora	0.011039	11	Acidithiobacillus	0.011345	5	Mesoplasma	0.012122	5	Acidithiobacillus	0.012017	4	Ochrobactrum	0.010851	3	Leptotrichia	0.010667	9	0.004177	257	Gloeocapsa	Sporolactobacillus	0.011017	2
0.008686	5	Sulfitobacter	0.011656	4	Variovorax	0.009488	8	Candidatus Jettenia	0.009606	9	Sporolactobacillus	0.011039	11	Enhygromyxa	0.011345	5	Marinobacterium	0.012122	5	Sphingopyxis	0.012017	4	Actinobacillus	0.010851	3	Liberibacter	0.010667	9	0.004112	253	Alicyclobacillus	Haloarcula	0.011017	2
0.008686	5	Natrialba	0.011656	4	Sporichthya	0.009488	8	Patulibacter	0.009606	9	Methanosarcina	0.011039	11	Pleomorphomonas	0.011345	5	Polaribacter	0.012122	5	Anaerococcus	0.012017	4	Rickettsia	0.010851	3	Blattabacterium	0.010667	9	0.004079	251	Opitutus	Halobacterium	0.011017	2
0.008686	5	Borreliella	0.011656	4	Arthrospira	0.009488	8	Nonlabens	0.009606	9	Halococcus	0.011039	11	Gramella	0.011345	5	Planktothrix	0.012122	5	Cyanobium	0.012017	4	Cytophaga	0.010851	3	Desulfitobacterium	0.010667	9	0.004031	248	Cupriavidus	Acidovorax	0.011017	2
0.008686	5	Asticcacaulis	0.011656	4	Blastococcus	0.009488	8	Mesoflavibacter	0.009606	9	Pyrococcus	0.011039	11	Sphaerochaeta	0.011345	5	Nevskia	0.012122	5	Caldithrix	0.012017	4	Erythrobacter	0.010851	3	Actinosynnema	0.010667	9	0.003998	246	Azospirillum	Variovorax	0.011017	2
0.008686	5	Corallococcus	0.011656	4	Brachybacterium	0.009488	8	Labrenzia	0.009606	9	Halanaerobium	0.011039	11	Labrenzia	0.011345	5	Cyclobacterium	0.012122	5	Dorea	0.012017	4	Spirulina	0.010851	3	Ewingella	0.010667	9	0.003998	246	Brachybacterium	Simkania	0.011017	2
0.008686	5	Parachlamydia	0.011656	4	Caldicellulosiruptor	0.009488	8	Geminocystis	0.009606	9	Candidatus Phytoplasma	0.011039	11	Schlesneria	0.011345	5	Frateuria	0.012122	5	Enhygromyxa	0.012017	4	Nostoc	0.010851	3	Microcoleus	0.010667	9	0.003982	245	Halosimplex	Metallosphaera	0.011017	2
0.008686	5	Pseudoxanthomonas	0.011656	4	Pleurocapsa	0.009488	8	Pedosphaera	0.009606	9	Simkania	0.011039	11	Coleofasciculus	0.011345	5	Gracilibacillus	0.012122	5	Pontibacillus	0.012017	4	Actinopolyspora	0.010851	3	Halobacillus	0.010667	9	0.003966	244	Cystobacter	Devosia	0.011017	2
0.008686	5	Natrinema	0.011656	4	Aeropyrum	0.009488	8	Planctopirus	0.009606	9	Methylophaga	0.011039	11	Pedosphaera	0.011345	5	Asticcacaulis	0.012122	5	Sediminibacter	0.012017	4	Halococcus	0.010851	3	Devosia	0.010667	9	0.003966	244	Acidithiobacillus	Marinobacterium	0.011017	2
0.008686	5	Gloeocapsa	0.011656	4	Neptunomonas	0.008302	7	Methylophilus	0.009606	9	Microcoleus	0.011039	11	Alloprevotella	0.011345	5	Phaeospirillum	0.012122	5	Echinicola	0.012017	4	Pyrobaculum	0.010851	3	Microbulbifer	0.010667	9	0.003949	243	Hahella	Polaromonas	0.011017	2
0.008686	5	Cyanobacterium	0.011656	4	Desulfosporosinus	0.008302	7	Acidiphilium	0.009606	9	Sulfurospirillum	0.011039	11	Caballeronia	0.011345	5	Modestobacter	0.012122	5	Methanocella	0.012017	4	Desulfobacterium	0.010851	3	Psychroserpens	0.010667	9	0.003933	242	Peptoniphilus	Kocuria	0.011017	2
0.008686	5	Leifsonia	0.011656	4	Luteimonas	0.008302	7	Ochrobactrum	0.009606	9	Methylopila	0.010035	10	Stigmatella	0.011345	5	Chloroherpeton	0.012122	5	Coleofasciculus	0.012017	4	Halanaerobium	0.010851	3	Lamprocystis	0.010667	9	0.003917	241	Haloferax	Sulfurospirillum	0.011017	2
0.008686	5	Bacteriovorax	0.011656	4	Marmoricola	0.008302	7	Chlorobium	0.009606	9	Facklamia	0.010035	10	Comamonas	0.011345	5	Cyanobacterium	0.012122	5	Granulicella	0.012017	4	Sporomusa	0.010851	3	Sulfurospirillum	0.010667	9	0.003884	239	Actinopolymorpha	Glycomyces	0.011017	2
0.008686	5	Oceanicaulis	0.011656	4	Roseivivax	0.008302	7	Nostoc	0.009606	9	Duganella	0.010035	10	Chromobacterium	0.011345	5	Oceanicaulis	0.012122	5	Pseudooceanicola	0.012017	4	Gardnerella	0.010851	3	Natrialba	0.010667	9	0.003884	239	Tannerella	Parachlamydia	0.011017	2
0.008686	5	Acaryochloris	0.011656	4	Cellulophaga	0.008302	7	Thermoactinomyces	0.009606	9	Psychroflexus	0.010035	10	Desulfuromonas	0.011345	5	Acaryochloris	0.009698	4	Pelobacter	0.012017	4	Acidovorax	0.010851	3	Desulfurobacterium	0.010667	9	0.003868	238	Rhodopseudomonas	Roseivivax	0.011017	2
0.008686	5	Cellulosimicrobium	0.011656	4	Ensifer	0.008302	7	Methanosarcina	0.009606	9	Virgibacillus	0.010035	10	Desulfobulbus	0.011345	5	Cellulosimicrobium	0.009698	4	Stigmatella	0.012017	4	Herbidospora	0.010851	3	Psychromonas	0.010667	9	0.003868	238	Thiomonas	Roseiflexus	0.011017	2
0.008686	5	Anaerococcus	0.011656	4	Alishewanella	0.008302	7	Teredinibacter	0.009606	9	Cupriavidus	0.010035	10	Desulfococcus	0.011345	5	Arenibacter	0.009698	4	Borrelia	0.012017	4	Brachyspira	0.010851	3	Cyclobacterium	0.010667	9	0.003852	237	Nitrospina	Aequorivita	0.011017	2
0.008686	5	Thalassospira	0.011656	4	Roseomonas	0.008302	7	Natronococcus	0.009606	9	Roseiflexus	0.010035	10	Cytophaga	0.011345	5	Sulfurimonas	0.009698	4	Alteromonas	0.012017	4	Gloeobacter	0.010851	3	Flexithrix	0.010667	9	0.003852	237	Ralstonia	Hahella	0.011017	2
0.008686	5	Smithella	0.011656	4	Geobacillus	0.008302	7	Helcococcus	0.009606	9	Roseomonas	0.010035	10	Sporocytophaga	0.011345	5	Halobiforma	0.009698	4	Methylomonas	0.012017	4	Agromyces	0.010851	3	Waddlia	0.010667	9	0.003836	236	Colwellia	Gillisia	0.011017	2
0.008686	5	Oceanobacillus	0.011656	4	Olsenella	0.008302	7	Catenuloplanes	0.009606	9	Idiomarina	0.010035	10	Haloarcula	0.011345	5	Arsenicicoccus	0.009698	4	Methylosinus	0.012017	4	Microcoleus	0.010851	3	Dechloromonas	0.010667	9	0.003738	230	Ruegeria	Oceanicola	0.011017	2
0.008686	5	Hoeflea	0.011656	4	Peptoniphilus	0.008302	7	Acetobacterium	0.009606	9	Anoxybacillus	0.010035	10	Desulfobacula	0.011345	5	Chthoniobacter	0.009698	4	Proteus	0.012017	4	Halobacillus	0.010851	3	Thermaerobacter	0.010667	9	0.003722	229	Bdellovibrio	Rhodopirellula	0.011017	2
0.008686	5	Silanimonas	0.011656	4	Sphingopyxis	0.008302	7	Variovorax	0.009606	9	Dysgonomonas	0.010035	10	Herbidospora	0.011345	5	Patulibacter	0.009698	4	Providencia	0.012017	4	Intrasporangium	0.010851	3	Asticcacaulis	0.010667	9	0.003706	228	Chlorogloeopsis	Elizabethkingia	0.011017	2
0.008686	5	Chthoniobacter	0.011656	4	Oceanobacillus	0.008302	7	Simkania	0.009606	9	Thalassospira	0.010035	10	Natronococcus	0.011345	5	Niabella	0.009698	4	Actinobacillus	0.012017	4	Lamprocystis	0.010851	3	Virgibacillus	0.010667	9	0.003641	224	Nakamurella	Criblamydia	0.011017	2
0.008686	5	Sphaerochaeta	0.011656	4	Candidatus Pelagibacter	0.008302	7	Dactylosporangium	0.009606	9	Smithella	0.010035	10	Alicyclobacillus	0.011345	5	Actinomycetospora	0.009698	4	Rickettsia	0.012017	4	Kocuria	0.010851	3	Modestobacter	0.009482	8	0.003641	224	Candidatus Accumulibacter	Pirellula	0.011017	2
0.008686	5	Catenulispora	0.011656	4	Belliella	0.008302	7	Actinokineospora	0.009606	9	Microvirga	0.010035	10	Veillonella	0.011345	5	Elioraea	0.009698	4	Megasphaera	0.012017	4	Glycomyces	0.010851	3	Roseivivax	0.009482	8	0.003592	221	Pyrobaculum	Azospirillum	0.011017	2
0.008686	5	Methylacidiphilum	0.011656	4	Candidatus Scalindua	0.008302	7	Kutzneria	0.009606	9	Enterovibrio	0.010035	10	Thauera	0.011345	5	Hoyosella	0.009698	4	Thiothrix	0.012017	4	Sulfitobacter	0.010851	3	Ensifer	0.009482	8	0.003576	220	Porticoccus	Methylomonas	0.011017	2
0.008686	5	Zavarzinella	0.011656	4	Thermodesulfatator	0.008302	7	Devosia	0.009606	9	Methylohalobius	0.010035	10	Bilophila	0.011345	5	Thermogemmatispora	0.009698	4	Erythrobacter	0.012017	4	Rheinheimera	0.010851	3	Desulfotalea	0.009482	8	0.003559	219	Kineosporia	Bordetella	0.011017	2
0.008686	5	Schlesneria	0.011656	4	Crinalium	0.008302	7	Marinobacterium	0.009606	9	Lentisphaera	0.010035	10	Moritella	0.011345	5	Chthonomonas	0.009698	4	Fischerella	0.012017	4	Waddlia	0.010851	3	Alishewanella	0.009482	8	0.003543	218	Sphingopyxis	Edwardsiella	0.011017	2
0.008686	5	Candidatus Koribacter	0.011656	4	Oceanicola	0.008302	7	Kineosporia	0.009606	9	Methylotenera	0.010035	10	Sulfitobacter	0.011345	5	Commensalibacter	0.009698	4	Nitrosococcus	0.012017	4	Thermaerobacter	0.010851	3	Limnobacter	0.009482	8	0.003543	218	Castellaniella	Rickettsia	0.011017	2
0.008686	5	Phycisphaera	0.011656	4	Rhodopirellula	0.008302	7	Psychroserpens	0.009606	9	Zavarzinella	0.010035	10	Parachlamydia	0.011345	5	Desulfatiglans	0.009698	4	Leuconostoc	0.012017	4	Duganella	0.010851	3	Idiomarina	0.009482	8	0.003527	217	Thiocapsa	Desulfococcus	0.011017	2
0.008686	5	Marivirga	0.011656	4	Sulfurovum	0.008302	7	Polaromonas	0.009606	9	Caballeronia	0.010035	10	Ruegeria	0.011345	5	Gorillibacterium	0.009698	4	Gemella	0.012017	4	Asticcacaulis	0.010851	3	Hahella	0.009482	8	0.003527	217	Brevibacterium	Afipia	0.011017	2
0.008686	5	Moorea	0.011656	4	Odoribacter	0.008302	7	Methylopila	0.008539	8	Stigmatella	0.010035	10	Chloroherpeton	0.011345	5	Gemmatirosa	0.009698	4	Actinopolyspora	0.012017	4	Phaeospirillum	0.010851	3	Anaerococcus	0.009482	8	0.003511	216	Sulfurimonas	Prochlorothrix	0.011017	2
0.008686	5	Candidatus Atelocyanobacterium	0.011656	4	Stackebrandtia	0.008302	7	Rheinheimera	0.008539	8	Herpetosiphon	0.010035	10	Actinopolymorpha	0.009076	4	Dictyoglomus	0.009698	4	Sporolactobacillus	0.012017	4	Glaciecola	0.010851	3	Tistrella	0.009482	8	0.003494	215	Candidatus Pelagibacter	Clavibacter	0.011017	2
0.008686	5	Pseudobacteroides	0.011656	4	Sulfuricurvum	0.008302	7	Asticcacaulis	0.008539	8	Comamonas	0.010035	10	Roseiflexus	0.009076	4	Phenylobacterium	0.009698	4	Haloferax	0.012017	4	Chloroherpeton	0.010851	3	Arenibacter	0.009482	8	0.003478	214	Rhodanobacter	Actinopolyspora	0.011017	2
0.008686	5	Kamptonema	0.011656	4	Prolixibacter	0.008302	7	Hippea	0.008539	8	Gluconobacter	0.010035	10	Roseomonas	0.009076	4	Borrelia	0.009698	4	Desulfobacterium	0.012017	4	Cyanobacterium	0.010851	3	Smithella	0.009482	8	0.003478	214	Cedecea	Archaeoglobus	0.011017	2
0.008686	5	Desulfatiglans	0.011656	4	Halalkalicoccus	0.008302	7	Virgibacillus	0.008539	8	Erwinia	0.010035	10	Anoxybacillus	0.009076	4	Azotobacter	0.009698	4	Teredinibacter	0.012017	4	Tolypothrix	0.010851	3	Acetoanaerobium	0.009482	8	0.003478	214	Planktomarina	Sporomusa	0.011017	2
0.008686	5	Caballeronia	0.011656	4	Meganema	0.008302	7	Zobellia	0.008539	8	Proteus	0.010035	10	Dysgonomonas	0.009076	4	Ochrobactrum	0.009698	4	Carnobacterium	0.012017	4	Actinopolymorpha	0.010851	3	Plesiocystis	0.009482	8	0.003462	213	Halothece	Teredinibacter	0.011017	2
0.006949	4	Pelobacter	0.011656	4	Aureispira	0.008302	7	Roseiflexus	0.008539	8	Edwardsiella	0.010035	10	Haliangium	0.009076	4	Citrobacter	0.009698	4	Desulfobacula	0.012017	4	Acidithiobacillus	0.010851	3	Chamaesiphon	0.009482	8	0.003397	209	Arenimonas	Gardnerella	0.011017	2
0.006949	4	Cystobacter	0.011656	4	Haladaptatus	0.008302	7	Thermosynechococcus	0.008539	8	Actinobacillus	0.010035	10	Gemmatimonas	0.009076	4	Providencia	0.009698	4	Thermodesulfovibrio	0.012017	4	Ornithinimicrobium	0.010851	3	Anaerolinea	0.009482	8	0.003381	208	Catenulispora	Verrucomicrobium	0.011017	2
0.006949	4	Azospirillum	0.011656	4	Niabella	0.008302	7	Cellulosimicrobium	0.008539	8	Saprospira	0.010035	10	Arenibacter	0.009076	4	Actinobacillus	0.009698	4	Herbidospora	0.012017	4	Alkalilimnicola	0.010851	3	Robiginitalea	0.009482	8	0.003381	208	Geminicoccus	Thermodesulfovibrio	0.011017	2
0.006949	4	Methylosinus	0.011656	4	Halopiger	0.008302	7	Anaeromyxobacter	0.008539	8	Synechocystis	0.010035	10	Smithella	0.009076	4	Roseburia	0.009698	4	Syntrophobacter	0.012017	4	Idiomarina	0.010851	3	Thermosinus	0.009482	8	0.003332	205	Calothrix	Herbidospora	0.011017	2
0.006949	4	Gluconobacter	0.011656	4	Solimonas	0.008302	7	Smithella	0.008539	8	Lactococcus	0.010035	10	Nitratireductor	0.009076	4	Chlorobium	0.009698	4	Leptotrichia	0.012017	4	Acaryochloris	0.010851	3	Stackebrandtia	0.009482	8	0.003332	205	Acidobacterium	Veillonella	0.011017	2
0.006949	4	Ochrobactrum	0.011656	4	Methanocella	0.008302	7	Chamaesiphon	0.008539	8	Kurthia	0.010035	10	Rhodopirellula	0.009076	4	Porphyrobacter	0.009698	4	Buchnera	0.012017	4	Methylosarcina	0.010851	3	Haloquadratum	0.009482	8	0.003332	205	Exiguobacterium	Gloeobacter	0.011017	2
0.006949	4	Beijerinckia	0.011656	4	Geminocystis	0.008302	7	Belliella	0.008539	8	Haliscomenobacter	0.010035	10	Criblamydia	0.009076	4	Trichodesmium	0.009698	4	Agromyces	0.012017	4	Oerskovia	0.010851	3	Halalkalicoccus	0.009482	8	0.003332	205	Lysinibacillus	Catenuloplanes	0.011017	2
0.006949	4	Providencia	0.011656	4	Rudaea	0.008302	7	Nitratireductor	0.008539	8	Teredinibacter	0.010035	10	Catenulispora	0.009076	4	Erysipelothrix	0.009698	4	Exiguobacterium	0.012017	4	Opitutus	0.010851	3	Goodfellowiella	0.009482	8	0.003316	204	Edwardsiella	Exiguobacterium	0.011017	2
0.006949	4	Xenorhabdus	0.011656	4	Pedosphaera	0.008302	7	Oceanicola	0.008539	8	Photorhabdus	0.010035	10	Eudoraea	0.009076	4	Thermodesulfobacterium	0.009698	4	Liberibacter	0.012017	4	Methanocaldococcus	0.010851	3	Niastella	0.009482	8	0.003299	203	Haemophilus	Rahnella	0.011017	2
0.006949	4	Edwardsiella	0.011656	4	Oceaniovalibus	0.008302	7	Methyloversatilis	0.008539	8	Dactylosporangium	0.010035	10	Balneola	0.009076	4	Propionibacterium	0.009698	4	Blattabacterium	0.012017	4	Anaerolinea	0.010851	3	Patulibacter	0.009482	8	0.003299	203	Endozoicomonas	Nitrosospira	0.011017	2
0.006949	4	Rickettsia	0.011656	4	Erysipelatoclostridium	0.008302	7	Aggregatibacter	0.008539	8	Nitrosospira	0.010035	10	Granulicella	0.009076	4	Spiroplasma	0.009698	4	Brachybacterium	0.012017	4	Gillisia	0.010851	3	Haladaptatus	0.009482	8	0.003299	203	Actinocatenispora	Methylophaga	0.011017	2
0.006949	4	Roseburia	0.011656	4	Gorillibacterium	0.008302	7	Mucilaginibacter	0.008539	8	Microbulbifer	0.009032	9	Cystobacter	0.009076	4	Methanobacterium	0.009698	4	Syntrophus	0.012017	4	Maribacter	0.010851	3	Natranaerobius	0.009482	8	0.003299	203	Labrenzia	Microcoleus	0.011017	2
0.006949	4	Ruminobacter	0.011656	4	Gemmatirosa	0.008302	7	Singulisphaera	0.008539	8	Marinobacterium	0.009032	9	Herpetosiphon	0.009076	4	Haloferax	0.009698	4	Halobacillus	0.012017	4	Lentisphaera	0.010851	3	Congregibacter	0.009482	8	0.003267	201	Clavibacter	Microbulbifer	0.011017	2
0.006949	4	Desulfococcus	0.008742	3	Azorhizobium	0.008302	7	Methanocella	0.008539	8	Candidatus Arthromitus	0.009032	9	Azospirillum	0.009076	4	Natronobacterium	0.009698	4	Planktothrix	0.012017	4	Geopsychrobacter	0.010851	3	Eudoraea	0.009482	8	0.003267	201	Dactylococcopsis	Polaribacter	0.011017	2
0.006949	4	Thiobacillus	0.008742	3	Pelobacter	0.008302	7	Cesiribacter	0.008539	8	Aneurinibacillus	0.009032	9	Escherichia	0.009076	4	Pyrococcus	0.009698	4	Spirillospora	0.012017	4	Hoeflea	0.010851	3	Mangrovibacter	0.009482	8	0.003267	201	Kocuria	Meiothermus	0.011017	2
0.006949	4	Thiovulum	0.008742	3	Methylocystis	0.008302	7	Melioribacter	0.008539	8	Glycomyces	0.009032	9	Rickettsia	0.009076	4	Staphylothermus	0.009698	4	Methylopila	0.012017	4	Kordiimonas	0.010851	3	Candidatus Cloacimonas	0.009482	8	0.003267	201	Sulfurospirillum	Psychromonas	0.011017	2
0.006949	4	Saprospira	0.008742	3	Gluconobacter	0.008302	7	Moorea	0.008539	8	Spirillospora	0.009032	9	Afipia	0.009076	4	Methanoplanus	0.009698	4	Meiothermus	0.012017	4	Advenella	0.010851	3	Oscillibacter	0.009482	8	0.003251	200	Blautia	Pseudoxanthomonas	0.011017	2
0.006949	4	Thiothrix	0.008742	3	Moraxella	0.008302	7	Candidatus Microgenomatus	0.008539	8	Nevskia	0.009032	9	Microcystis	0.009076	4	Halanaerobium	0.009698	4	Rheinheimera	0.012017	4	Rubellimicrobium	0.010851	3	Segetibacter	0.009482	8	0.003234	199	Thiorhodospira	Limnobacter	0.011017	2
0.006949	4	Chlorogloeopsis	0.008742	3	Alcaligenes	0.007116	6	Alcaligenes	0.008539	8	Chitinophaga	0.009032	9	Spirulina	0.009076	4	Xylella	0.009698	4	Thermocrinis	0.012017	4	Shinella	0.010851	3	Singulisphaera	0.009482	8	0.003202	197	Psychrobacter	Idiomarina	0.011017	2
0.006949	4	Synechocystis	0.008742	3	Ochrobactrum	0.007116	6	Chromobacterium	0.008539	8	Hippea	0.009032	9	Prochlorothrix	0.009076	4	Sporomusa	0.009698	4	Nonomuraea	0.012017	4	Dokdonia	0.010851	3	Labrenzia	0.009482	8	0.003202	197	Gardnerella	Haliangium	0.011017	2
0.006949	4	Spirulina	0.008742	3	Providencia	0.007116	6	Proteus	0.008539	8	Actinopolymorpha	0.009032	9	Gemella	0.009076	4	Roseobacter	0.009698	4	Hippea	0.012017	4	Niastella	0.010851	3	Sediminibacterium	0.009482	8	0.003186	196	Modestobacter	Cyanobium	0.011017	2
0.006949	4	Prochlorothrix	0.008742	3	Actinobacillus	0.007116	6	Aeromonas	0.008539	8	Aequorivita	0.009032	9	Kurthia	0.009076	4	Gardnerella	0.009698	4	Virgibacillus	0.012017	4	Rivularia	0.010851	3	Aliivibrio	0.009482	8	0.003169	195	Archaeoglobus	Salinispora	0.011017	2
0.006949	4	Leuconostoc	0.008742	3	Desulfobulbus	0.007116	6	Actinobacillus	0.008539	8	Hahella	0.009032	9	Microtetraspora	0.009076	4	Natronococcus	0.009698	4	Modestobacter	0.012017	4	Congregibacter	0.010851	3	Zavarzinella	0.009482	8	0.003169	195	Spirillospora	Aurantimonas	0.011017	2
0.006949	4	Lactococcus	0.008742	3	Selenomonas	0.007116	6	Desulfuromonas	0.008539	8	Cyanobium	0.009032	9	Halobacterium	0.009076	4	Helcococcus	0.009698	4	Thermicanus	0.012017	4	Sphaerochaeta	0.010851	3	Schlesneria	0.009482	8	0.003153	194	Leifsonia	Microvirga	0.011017	2
0.006949	4	Gemella	0.008742	3	Sporocytophaga	0.007116	6	Desulfococcus	0.008539	8	Crinalium	0.009032	9	Haloferax	0.009076	4	Coprococcus	0.009698	4	Cyanobacterium	0.012017	4	Paenisporosarcina	0.010851	3	Fibrisoma	0.009482	8	0.003153	194	Algoriphagus	Dorea	0.011017	2
0.006949	4	Clavibacter	0.008742	3	Microscilla	0.007116	6	Thiobacillus	0.008539	8	Nitratireductor	0.009032	9	Haliscomenobacter	0.009076	4	Catenuloplanes	0.009698	4	Cellulophaga	0.012017	4	Schlesneria	0.010851	3	Pedosphaera	0.009482	8	0.003121	192	Janthinobacterium	Caldilinea	0.011017	2
0.006949	4	Saccharopolyspora	0.008742	3	Thiocapsa	0.007116	6	Bdellovibrio	0.008539	8	Maribacter	0.009032	9	Fervidobacterium	0.009076	4	Candidatus Microthrix	0.009698	4	Roseomonas	0.012017	4	Candidatus Koribacter	0.010851	3	Nodosilinea	0.009482	8	0.003088	190	Geobacter	Methylohalobius	0.011017	2
0.006949	4	Micromonospora	0.008742	3	Spirulina	0.007116	6	Beggiatoa	0.008539	8	Thioclava	0.009032	9	Teredinibacter	0.009076	4	Syntrophus	0.009698	4	Geobacillus	0.012017	4	Marivirga	0.010851	3	Catelliglobosispora	0.009482	8	0.003072	189	Mycetocola	Sulfuricurvum	0.011017	2
0.006949	4	Streptosporangium	0.008742	3	Nitrosococcus	0.007116	6	Afipia	0.008539	8	Chthoniobacter	0.009032	9	Gardnerella	0.009076	4	Pleurocapsa	0.009698	4	Knoellia	0.012017	4	Aliagarivorans	0.010851	3	Melioribacter	0.009482	8	0.003056	188	Arcobacter	Pelosinus	0.011017	2
0.006949	4	Mobiluncus	0.008742	3	Leuconostoc	0.007116	6	Erythrobacter	0.008539	8	Dokdonia	0.009032	9	Azoarcus	0.009076	4	Candidatus Arthromitus	0.009698	4	Dysgonomonas	0.012017	4	Gilvimarinus	0.010851	3	Catenovulum	0.009482	8	0.003056	188	Pseudobacteroides	Solimonas	0.011017	2
0.006949	4	Sporolactobacillus	0.008742	3	Brevibacterium	0.007116	6	Leuconostoc	0.008539	8	Criblamydia	0.009032	9	Sulfobacillus	0.009076	4	Intrasporangium	0.009698	4	Cellulosimicrobium	0.012017	4	Fodinicurvata	0.010851	3	Arcticibacter	0.009482	8	0.003023	186	Phenylobacterium	Rudanella	0.011017	2
0.006949	4	Acholeplasma	0.008742	3	Saccharopolyspora	0.007116	6	Lactococcus	0.008539	8	Candidatus Jettenia	0.009032	9	Sinorhizobium	0.009076	4	Leucobacter	0.009698	4	Haliangium	0.012017	4	Thalassotalea	0.010851	3	Pseudobacteroides	0.009482	8	0.003007	185	Roseomonas	Pseudogulbenkiania	0.011017	2
0.006949	4	Methanosaeta	0.008742	3	Thermoactinomyces	0.007116	6	Gemella	0.008539	8	Patulibacter	0.009032	9	Catenuloplanes	0.009076	4	Nesterenkonia	0.009698	4	Gemmatimonas	0.012017	4	Phaeodactylibacter	0.010851	3	Romboutsia	0.009482	8	0.003007	185	Candidatus Atelocyanobacterium	Haloferula	0.011017	2
0.006949	4	Archaeoglobus	0.008742	3	Aeromicrobium	0.007116	6	Erysipelothrix	0.008539	8	Actinomycetospora	0.009032	9	Rahnella	0.009076	4	Facklamia	0.009698	4	Opitutus	0.012017	4	Saccharicrinis	0.010851	3	Gimesia	0.009482	8	0.002991	184	Stanieria	Paraprevotella	0.011017	2
0.006949	4	Halobacterium	0.008742	3	Pimelobacter	0.007116	6	Saccharopolyspora	0.008539	8	Solimonas	0.009032	9	Dactylosporangium	0.009076	4	Psychromonas	0.009698	4	Salinisphaera	0.009013	3	Stigmatella	0.010851	3	Pseudodonghicola	0.009482	8	0.002991	184	Caldanaerobacter	Coleofasciculus	0.011017	2
0.006949	4	Desulfobacter	0.008742	3	Mobiluncus	0.007116	6	Saccharomonospora	0.008539	8	Catenulispora	0.009032	9	Nitrospina	0.009076	4	Rheinheimera	0.009698	4	Aurantimonas	0.009013	3	Cystobacter	0.010851	3	Gemmatirosa	0.009482	8	0.002974	183	Erythrobacter	Marivirga	0.011017	2
0.006949	4	Thermoplasma	0.008742	3	Sporolactobacillus	0.007116	6	Haloarcula	0.008539	8	Desulfurivibrio	0.009032	9	Microbulbifer	0.009076	4	Waddlia	0.009698	4	Kribbella	0.009013	3	Pirellula	0.010851	3	Glutamicibacter	0.009482	8	0.002974	183	Brachyspira	Hamadaea	0.011017	2
0.006949	4	Teredinibacter	0.008742	3	Methanobrevibacter	0.007116	6	Halococcus	0.008539	8	Balneola	0.009032	9	Leucobacter	0.009076	4	Citromicrobium	0.009698	4	Sulfurimonas	0.009013	3	Leptospirillum	0.007234	2	Azorhizobium	0.009482	8	0.002958	182	Roseobacter	Cesiribacter	0.011017	2
0.006949	4	Carnobacterium	0.008742	3	Haloarcula	0.007116	6	Desulfobacterium	0.008539	8	Nitrososphaera	0.009032	9	Methylopila	0.009076	4	Duganella	0.009698	4	Jeotgalicoccus	0.009013	3	Alteromonas	0.007234	2	Pelobacter	0.009482	8	0.002942	181	Marinimicrobium	Kamptonema	0.011017	2
0.006949	4	Azoarcus	0.008742	3	Halobacterium	0.007116	6	Thermosipho	0.008539	8	Coleofasciculus	0.009032	9	Meiothermus	0.009076	4	Budvicia	0.009698	4	Anaerolinea	0.009013	3	Erwinia	0.007234	2	Lysobacter	0.009482	8	0.002909	179	Photobacterium	Planctopirus	0.011017	2
0.006949	4	Rubrivivax	0.008742	3	Thermoproteus	0.007116	6	Roseobacter	0.007471	7	Pirellula	0.009032	9	Waddlia	0.009076	4	Nonomuraea	0.009698	4	Caldilinea	0.009013	3	Bartonella	0.007234	2	Borrelia	0.009482	8	0.002909	179	Cellulophaga	Sediminispirochaeta	0.011017	2
0.006949	4	Thermodesulfovibrio	0.008742	3	Desulfobacterium	0.007116	6	Acidianus	0.007471	7	Methylobacillus	0.009032	9	Dechloromonas	0.009076	4	Hippea	0.009698	4	Crinalium	0.009013	3	Thiomicrospira	0.007234	2	Comamonas	0.008297	7	0.002877	177	Glaciibacter	Pelobacter	0.011017	2
0.006949	4	Herbidospora	0.008742	3	Thermotoga	0.007116	6	Azoarcus	0.007471	7	Methylosinus	0.009032	9	Myroides	0.009076	4	Ruegeria	0.009698	4	Gillisia	0.009013	3	Hydrogenobacter	0.007234	2	Methylomonas	0.008297	7	0.002861	176	Methanolobus	Leptospirillum	0.011017	2
0.006949	4	Veillonella	0.008742	3	Xylella	0.007116	6	Thermodesulfovibrio	0.007471	7	Bordetella	0.009032	9	Idiomarina	0.009076	4	Gloeocapsa	0.009698	4	Nitrincola	0.009013	3	Wolbachia	0.007234	2	Moraxella	0.008297	7	0.002861	176	Reyranella	Achromobacter	0.011017	2
0.006949	4	Buchnera	0.008742	3	Teredinibacter	0.007116	6	Herbidospora	0.007471	7	Acidiphilium	0.009032	9	Cellulosimicrobium	0.009076	4	Desulfotalea	0.009698	4	Advenella	0.009013	3	Microscilla	0.007234	2	Psychrobacter	0.008297	7	0.002861	176	Haloferula	Ochrobactrum	0.011017	2
0.006949	4	Catenuloplanes	0.008742	3	Carnobacterium	0.007116	6	Sporichthya	0.007471	7	Enterobacter	0.009032	9	Persephonella	0.009076	4	Candidatus Carsonella	0.009698	4	Gramella	0.009013	3	Trichodesmium	0.007234	2	Bordetella	0.008297	7	0.002828	174	Conexibacter	Chromobacterium	0.011017	2
0.006949	4	Simkania	0.008742	3	Arcobacter	0.007116	6	Bilophila	0.007471	7	Fibrobacter	0.009032	9	Sulfurimonas	0.009076	4	Roseiflexus	0.009698	4	Martelella	0.009013	3	Nitrosococcus	0.007234	2	Ochrobactrum	0.008297	7	0.002812	173	Streptosporangium	Erwinia	0.011017	2
0.006949	4	Sporichthya	0.008742	3	Sphingobacterium	0.007116	6	Microbulbifer	0.007471	7	Desulfococcus	0.009032	9	Belliella	0.009076	4	Roseomonas	0.009698	4	Methylibium	0.009013	3	Nitrospira	0.007234	2	Chromobacterium	0.008297	7	0.002812	173	Chrysiogenes	Megasphaera	0.011017	2
0.006949	4	Methylophaga	0.008742	3	Thermoanaerobacterium	0.007116	6	Polaribacter	0.007471	7	Beggiatoa	0.009032	9	Crocinitomix	0.009076	4	Geobacillus	0.009698	4	Fluviicola	0.009013	3	Leuconostoc	0.007234	2	Proteus	0.008297	7	0.002795	172	Rhodobacter	Ehrlichia	0.011017	2
0.006949	4	Microcoleus	0.008742	3	Microlunatus	0.007116	6	Sulfitobacter	0.007471	7	Microcystis	0.009032	9	Maribacter	0.009076	4	Halorhabdus	0.009698	4	Niastella	0.009013	3	Listeria	0.007234	2	Roseburia	0.008297	7	0.002779	171	Leptotrichia	Saprospira	0.011017	2
0.006949	4	Pleurocapsa	0.008742	3	Veillonella	0.007116	6	Facklamia	0.007471	7	Anabaena	0.009032	9	Sulfurovum	0.009076	4	Anoxybacillus	0.009698	4	Marinimicrobium	0.009013	3	Thermodesulfobacterium	0.007234	2	Desulfobulbus	0.008297	7	0.002779	171	Ktedonobacter	Sporocytophaga	0.011017	2
0.006949	4	Weissella	0.008742	3	Coprococcus	0.007116	6	Thermocrinis	0.007471	7	Prochlorothrix	0.009032	9	Hoeflea	0.009076	4	Smithella	0.009698	4	Candidatus Jettenia	0.009013	3	Thermoanaerobacter	0.007234	2	Thiovulum	0.008297	7	0.002747	169	Alcaligenes	Pelodictyon	0.011017	2
0.006949	4	Microbulbifer	0.008742	3	Thauera	0.007116	6	Chitinophaga	0.007471	7	Leuconostoc	0.009032	9	Rivularia	0.009076	4	Alicycliphilus	0.009698	4	Aureispira	0.009013	3	Saccharopolyspora	0.007234	2	Cytophaga	0.008297	7	0.00273	168	Nitrosococcus	Sporosarcina	0.011017	2
0.006949	4	Marinobacterium	0.008742	3	Catenuloplanes	0.007116	6	Psychroflexus	0.007471	7	Clavibacter	0.009032	9	Methyloversatilis	0.009076	4	Dyella	0.009698	4	Actinomycetospora	0.009013	3	Thermoactinomyces	0.007234	2	Rhodospirillum	0.008297	7	0.00273	168	Glycomyces	Aeromicrobium	0.011017	2
0.006949	4	Psychroserpens	0.008742	3	Acidobacterium	0.007116	6	Aquabacterium	0.007471	7	Actinopolyspora	0.009032	9	Echinicola	0.009076	4	Methylohalobius	0.009698	4	Alloscardovia	0.009013	3	Sphaerobacter	0.007234	2	Chloroflexus	0.008297	7	0.00273	168	Kribbella	Mobiluncus	0.011017	2
0.006949	4	Myxosarcina	0.008742	3	Riemerella	0.007116	6	Chloroherpeton	0.007471	7	Archaeoglobus	0.009032	9	Zavarzinella	0.009076	4	Nitratireductor	0.009698	4	Eudoraea	0.009013	3	Acholeplasma	0.007234	2	Nostoc	0.008297	7	0.00273	168	Rubellimicrobium	Haliscomenobacter	0.011017	2
0.006949	4	Glycomyces	0.008742	3	Dietzia	0.007116	6	Leifsonia	0.007471	7	Desulfobacterium	0.009032	9	Paenisporosarcina	0.009076	4	Oceanicola	0.009698	4	Rudanella	0.009013	3	Archaeoglobus	0.007234	2	Planococcus	0.008297	7	0.002714	167	Patulibacter	Desulfomonile	0.011017	2
0.006949	4	Desulfurobacterium	0.008742	3	Methylomicrobium	0.007116	6	Anoxybacillus	0.007471	7	Methanoplanus	0.009032	9	Moorea	0.009076	4	Nitrincola	0.009698	4	Balneola	0.009013	3	Desulfobacter	0.007234	2	Gemella	0.008297	7	0.002698	166	Arenibacter	Carnobacterium	0.011017	2
0.006949	4	Rheinheimera	0.008742	3	Methylophaga	0.007116	6	Dysgonomonas	0.007471	7	Desulfomonile	0.009032	9	Kamptonema	0.009076	4	Geopsychrobacter	0.009698	4	Pseudogulbenkiania	0.009013	3	Methanoplanus	0.007234	2	Kurthia	0.008297	7	0.002682	165	Haematobacter	Lachnospira	0.011017	2
0.006949	4	Thermaerobacter	0.008742	3	Stenotrophomonas	0.007116	6	Haliangium	0.007471	7	Sporomusa	0.009032	9	Desulfatiglans	0.009076	4	Stackebrandtia	0.009698	4	Zavarzinella	0.009013	3	Thermotoga	0.007234	2	Brevibacterium	0.008297	7	0.002665	164	Halococcus	Phyllobacterium	0.011017	2
0.006949	4	Neptunomonas	0.008742	3	Metallosphaera	0.007116	6	Novosphingobium	0.007471	7	Fervidobacterium	0.009032	9	Gimesia	0.009076	4	Segniliparus	0.009698	4	Chthonomonas	0.009013	3	Heliobacterium	0.007234	2	Propionibacterium	0.008297	7	0.002665	164	Alcanivorax	Sinorhizobium	0.011017	2
0.006949	4	Myroides	0.008742	3	Halobacteroides	0.007116	6	Lechevalieria	0.007471	7	Rhodoferax	0.008028	8	Azorhizobium	0.009076	4	Advenella	0.009698	4	Hamadaea	0.009013	3	Azoarcus	0.007234	2	Streptosporangium	0.008297	7	0.002649	163	Azoarcus	Thermoanaerobacterium	0.011017	2
0.006949	4	Marichromatium	0.008742	3	Kutzneria	0.007116	6	Cyanobium	0.007471	7	Thermodesulfovibrio	0.008028	8	Runella	0.009076	4	Endozoicomonas	0.009698	4	Proteiniclasticum	0.009013	3	Magnetospirillum	0.007234	2	Thermomonospora	0.008297	7	0.002649	163	Sulfitobacter	Sebaldella	0.011017	2
0.006949	4	Thermicanus	0.008742	3	Ferrimonas	0.007116	6	Persephonella	0.007471	7	Herbidospora	0.008028	8	Pirellula	0.009076	4	Saccharophagus	0.009698	4	Candidatus Methanoperedens	0.009013	3	Sulfobacillus	0.007234	2	Aeromicrobium	0.008297	7	0.002633	162	Aequorivita	Kingella	0.011017	2
0.006949	4	Ruegeria	0.008742	3	Microcoleus	0.007116	6	Enterovibrio	0.007471	7	Desulfitobacterium	0.008028	8	Alcaligenes	0.009076	4	Paludibacter	0.009698	4	Anditalea	0.009013	3	Acidothermus	0.007234	2	Mobiluncus	0.008297	7	0.002617	161	Hamadaea	Actinokineospora	0.011017	2
0.006949	4	Chloroherpeton	0.008742	3	Geothrix	0.007116	6	Caminibacter	0.007471	7	Kocuria	0.008028	8	Enterobacter	0.009076	4	Marinimicrobium	0.009698	4	Erysipelatoclostridium	0.009013	3	Colwellia	0.007234	2	Acholeplasma	0.008297	7	0.002584	159	Candidatus Carsonella	Stenotrophomonas	0.011017	2
0.006949	4	Desulfotalea	0.008742	3	Halobacillus	0.007116	6	Parvularcula	0.007471	7	Waddlia	0.008028	8	Roseburia	0.009076	4	Aureispira	0.009698	4	Thalassotalea	0.009013	3	Marinomonas	0.007234	2	Haloferax	0.008297	7	0.002584	159	Gillisia	Candidatus Microthrix	0.011017	2
0.006949	4	Roseiflexus	0.008742	3	Pseudobutyrivibrio	0.007116	6	Dyella	0.007471	7	Parachlamydia	0.008028	8	Desulfomicrobium	0.009076	4	Haematobacter	0.009698	4	Desulfatiglans	0.009013	3	Halothermothrix	0.007234	2	Sulfolobus	0.008297	7	0.002552	157	Methanobacterium	Ferrimonas	0.011017	2
0.006949	4	Thermosynechococcus	0.008742	3	Devosia	0.007116	6	Maribacter	0.007471	7	Oligella	0.008028	8	Pediococcus	0.009076	4	Natranaerobius	0.009698	4	Phaeodactylibacter	0.009013	3	Rathayibacter	0.007234	2	Desulfobacter	0.008297	7	0.002535	156	Pelagibacterium	Holospora	0.011017	2
0.006949	4	Azospira	0.008742	3	Kineosporia	0.007116	6	Lentisphaera	0.007471	7	Roseivivax	0.008028	8	Actinopolyspora	0.009076	4	Methyloversatilis	0.009698	4	Gemmatirosa	0.009013	3	Acetobacterium	0.007234	2	Haliscomenobacter	0.008297	7	0.002535	156	Paraglaciecola	Candidatus Arthromitus	0.011017	2
0.006949	4	Nodularia	0.008742	3	Myxosarcina	0.007116	6	Sulfurovum	0.007471	7	Gloeocapsa	0.008028	8	Saccharomonospora	0.009076	4	Oscillibacter	0.009698	4	Euryhalocaulis	0.009013	3	Dactylosporangium	0.007234	2	Thermosipho	0.008297	7	0.002535	156	Lunatimonas	Aneurinibacillus	0.011017	2
0.006949	4	Shuttleworthia	0.008742	3	Polaromonas	0.007116	6	Hoeflea	0.007471	7	Zobellia	0.008028	8	Desulfomonile	0.009076	4	Segetibacter	0.009698	4	Candidatus Rubidus	0.009013	3	Nitrospina	0.007234	2	Teredinibacter	0.008297	7	0.002519	155	Hoeflea	Sulfitobacter	0.011017	2
0.006949	4	Arenibacter	0.008742	3	Lamprocystis	0.007116	6	Leeuwenhoekiella	0.007471	7	Bacteriovorax	0.008028	8	Acetonema	0.009076	4	Singulisphaera	0.009698	4	Peptoanaerobacter	0.009013	3	Dermabacter	0.007234	2	Roseobacter	0.008297	7	0.002487	153	Thauera	Natrialba	0.011017	2
0.006949	4	Proteocatella	0.008742	3	Aneurinibacillus	0.007116	6	Segniliparus	0.007471	7	Starkeya	0.008028	8	Acidianus	0.009076	4	Geminicoccus	0.007273	3	Azorhizobium	0.009013	3	Dietzia	0.007234	2	Gardnerella	0.008297	7	0.002487	153	Dorea	Borreliella	0.011017	2
0.006949	4	Conexibacter	0.008742	3	Sanguibacter	0.007116	6	Lacinutrix	0.007471	7	Sphingopyxis	0.008028	8	Liberibacter	0.009076	4	Nitrososphaera	0.007273	3	Dictyoglomus	0.009013	3	Metallosphaera	0.007234	2	Carnobacterium	0.008297	7	0.002438	150	Yersinia	Facklamia	0.011017	2
0.006949	4	Sulfurimonas	0.008742	3	Methylopila	0.007116	6	Fluviicola	0.007471	7	Kribbella	0.008028	8	Sporichthya	0.009076	4	Thalassobaculum	0.007273	3	Phenylobacterium	0.009013	3	Chromohalobacter	0.007234	2	Acidianus	0.008297	7	0.002438	150	Intrasporangium	Rheinheimera	0.011017	2
0.006949	4	Enhygromyxa	0.008742	3	Natrialba	0.007116	6	Candidatus Solibacter	0.007471	7	Belliella	0.008028	8	Nitrosospira	0.009076	4	Zavarzinella	0.007273	3	Runella	0.009013	3	Rubrobacter	0.007234	2	Sulfobacillus	0.008297	7	0.002422	149	Citrobacter	Gracilibacillus	0.011017	2
0.006949	4	Chamaesiphon	0.008742	3	Meiothermus	0.007116	6	Criblamydia	0.007471	7	Grimontia	0.008028	8	Actinokineospora	0.009076	4	Novispirillum	0.007273	3	Pirellula	0.009013	3	Halobacteroides	0.007234	2	Acidothermus	0.008297	7	0.002422	149	Geopsychrobacter	Neptunomonas	0.011017	2
0.006949	4	Caldilinea	0.008742	3	Desulfonatronum	0.007116	6	Methylotenera	0.007471	7	Crocinitomix	0.008028	8	Ralstonia	0.009076	4	Phycisphaera	0.007273	3	Azotobacter	0.009013	3	Caloramator	0.007234	2	Acetohalobium	0.008297	7	0.002405	148	Saccharopolyspora	Hippea	0.011017	2
0.006949	4	Gillisia	0.008742	3	Citromicrobium	0.007116	6	Niabella	0.007471	7	Advenella	0.008028	8	Glycomyces	0.009076	4	Marivirga	0.007273	3	Gluconobacter	0.009013	3	Pleurocapsa	0.007234	2	Brachyspira	0.008297	7	0.002405	148	Collimonas	Virgibacillus	0.011017	2
0.006949	4	Segniliparus	0.008742	3	Thermaerobacter	0.007116	6	Echinicola	0.007471	7	Gramella	0.008028	8	Nevskia	0.009076	4	Polymorphum	0.007273	3	Moraxella	0.009013	3	Holospora	0.007234	2	Syntrophobacter	0.008297	7	0.002405	148	Alistipes	Phaeospirillum	0.011017	2
0.006949	4	Haloquadratum	0.008742	3	Rhodanobacter	0.007116	6	Sphaerochaeta	0.007471	7	Fluviicola	0.008028	8	Facklamia	0.009076	4	Pedosphaera	0.007273	3	Psychrobacter	0.009013	3	Mesoplasma	0.007234	2	Janthinobacterium	0.008297	7	0.002405	148	Rhodopirellula	Marmoricola	0.011017	2
0.006949	4	Parabacteroides	0.008742	3	Mycetocola	0.007116	6	Methylacidiphilum	0.007471	7	Fulvivirga	0.008028	8	Chitinophaga	0.009076	4	Lutibaculum	0.007273	3	Thermomicrobium	0.009013	3	Kineosporia	0.007234	2	Helcococcus	0.008297	7	0.002389	147	Parabacteroides	Coprobacillus	0.011017	2
0.006949	4	Echinicola	0.008742	3	Succinispira	0.007116	6	Zavarzinella	0.007471	7	Barnesiella	0.008028	8	Tatumella	0.009076	4	Peptoclostridium	0.007273	3	Acidiphilium	0.009013	3	Myxosarcina	0.007234	2	Sebaldella	0.008297	7	0.002389	147	Rudaea	Pectobacterium	0.011017	2
0.006949	4	Caenispirillum	0.008742	3	Pseudoxanthomonas	0.007116	6	Schlesneria	0.007471	7	Mucilaginibacter	0.008028	8	Psychroflexus	0.009076	4	Planctopirus	0.007273	3	Beijerinckia	0.009013	3	Nakamurella	0.007234	2	Leptonema	0.008297	7	0.002389	147	Glutamicibacter	Knoellia	0.011017	2
0.006949	4	Dethiobacter	0.008742	3	Nonomuraea	0.007116	6	Thermogemmatispora	0.007471	7	Kiloniella	0.008028	8	Phaeospirillum	0.009076	4	Vermiphilus	0.007273	3	Escherichia	0.009013	3	Aneurinibacillus	0.007234	2	Phascolarctobacterium	0.008297	7	0.002373	146	Pelobacter	Anoxybacillus	0.011017	2
0.006949	4	Oscillibacter	0.008742	3	Eggerthella	0.007116	6	Granulicella	0.007471	7	Aliivibrio	0.008028	8	Knoellia	0.009076	4	Xanthomarina	0.007273	3	Bartonella	0.009013	3	Natrialba	0.007234	2	Gloeobacter	0.008297	7	0.002373	146	Pediococcus	Shuttleworthia	0.011017	2
0.006949	4	Nitrososphaera	0.008742	3	Virgibacillus	0.007116	6	Lachnoanaerobaculum	0.007471	7	Methanocella	0.008028	8	Bacteriovorax	0.009076	4	Acidipropionibacterium	0.007273	3	Coxiella	0.009013	3	Actinoalloteichus	0.007234	2	Catenuloplanes	0.008297	7	0.002357	145	Thiomicrospira	Smithella	0.011017	2
0.006949	4	Pseudogulbenkiania	0.008742	3	Verrucosispora	0.007116	6	Gilliamella	0.007471	7	Ignavibacterium	0.008028	8	Hahella	0.009076	4	Peptoanaerobacter	0.007273	3	Roseburia	0.009013	3	Meiothermus	0.007234	2	Agromyces	0.008297	7	0.002357	145	Gracilimonas	Longispora	0.011017	2
0.006949	4	Blautia	0.008742	3	Gluconacetobacter	0.007116	6	Phaeodactylibacter	0.007471	7	Granulicella	0.008028	8	Nodularia	0.009076	4	Bernardetia	0.007273	3	Desulfuromonas	0.009013	3	Facklamia	0.007234	2	Exiguobacterium	0.008297	7	0.00234	144	Methylosinus	Sulfurihydrogenibium	0.011017	2
0.006949	4	Paraprevotella	0.008742	3	Ruegeria	0.007116	6	Paraglaciecola	0.007471	7	Cesiribacter	0.008028	8	Sphingopyxis	0.009076	4	Hugenholtzia	0.007273	3	Desulfomicrobium	0.009013	3	Aquamicrobium	0.007234	2	Rahnella	0.008297	7	0.00234	144	Stenotrophomonas	Enhygromyxa	0.011017	2
0.006949	4	Novispirillum	0.008742	3	Collinsella	0.007116	6	Candidatus Rubidus	0.007471	7	Melioribacter	0.008028	8	Thalassospira	0.006807	3	Pelobacter	0.007273	3	Nitrosomonas	0.009013	3	Halothece	0.007234	2	Streptobacillus	0.008297	7	0.00234	144	Loktanella	Jeotgalicoccus	0.011017	2
0.006949	4	Geminocystis	0.008742	3	Desulfotalea	0.007116	6	Candidatus Izimaplasma	0.007471	7	Moorea	0.008028	8	Salinisphaera	0.006807	3	Stigmatella	0.007273	3	Bdellovibrio	0.009013	3	Mycetocola	0.007234	2	Holophaga	0.008297	7	0.002324	143	Catenuloplanes	Reinekea	0.011017	2
0.006949	4	Thermogemmatispora	0.008742	3	Leifsonia	0.00593	5	Pelobacter	0.007471	7	Kamptonema	0.008028	8	Halobiforma	0.006807	3	Cystobacter	0.007273	3	Cytophaga	0.009013	3	Succinispira	0.007234	2	Dietzia	0.008297	7	0.002324	143	Dehalobacter	Dyella	0.011017	2
0.006949	4	Fibrisoma	0.008742	3	Tolypothrix	0.00593	5	Stigmatella	0.007471	7	Terrisporobacter	0.008028	8	Kordia	0.006807	3	Azospirillum	0.007273	3	Porphyrobacter	0.009013	3	Delftia	0.007234	2	Actinokineospora	0.008297	7	0.002324	143	Fulvimarina	Crinalium	0.011017	2
0.006949	4	Pedosphaera	0.008742	3	Pectobacterium	0.00593	5	Herpetosiphon	0.007471	7	Erysipelatoclostridium	0.008028	8	Crinalium	0.006807	3	Francisella	0.007273	3	Synechocystis	0.009013	3	Buttiauxella	0.007234	2	Methylophaga	0.008297	7	0.002308	142	Metallosphaera	Nitratireductor	0.011017	2
0.006949	4	Methanomassiliicoccus	0.008742	3	Halonatronum	0.00593	5	Pirellula	0.007471	7	Paraglaciecola	0.008028	8	Lentisphaera	0.006807	3	Methylosinus	0.007273	3	Nostoc	0.009013	3	Parachlamydia	0.007234	2	Halobacteroides	0.008297	7	0.002308	142	Pseudoxanthomonas	Sulfurovum	0.011017	2
0.006949	4	Hamadaea	0.008742	3	Dysgonomonas	0.00593	5	Methylocystis	0.007471	7	Hungatella	0.008028	8	Geopsychrobacter	0.006807	3	Alcaligenes	0.007273	3	Prochlorothrix	0.009013	3	Luteimonas	0.007234	2	Brachybacterium	0.008297	7	0.002292	141	Sediminibacter	Geopsychrobacter	0.011017	2
0.006949	4	Kyrpidia	0.008742	3	Cellulosimicrobium	0.00593	5	Methylomonas	0.007471	7	Lunatimonas	0.008028	8	Leeuwenhoekiella	0.006807	3	Escherichia	0.007273	3	Planococcus	0.009013	3	Slackia	0.007234	2	Johnsonella	0.008297	7	0.002275	140	Idiomarina	Kordiimonas	0.011017	2
0.006949	4	Proteiniclasticum	0.008742	3	Nodularia	0.00593	5	Methylosinus	0.007471	7	Peptoanaerobacter	0.008028	8	Advenella	0.006807	3	Klebsiella	0.007273	3	Renibacterium	0.009013	3	Roseivivax	0.007234	2	Pleurocapsa	0.008297	7	0.002259	139	Sharpea	Haloquadratum	0.011017	2
0.006949	4	Mesotoga	0.008742	3	Lechevalieria	0.00593	5	Psychrobacter	0.007471	7	Bernardetia	0.008028	8	Olleya	0.006807	3	Xenorhabdus	0.007273	3	Saccharopolyspora	0.009013	3	Gloeocapsa	0.007234	2	Leucothrix	0.008297	7	0.002243	138	Francisella	Nitrososphaera	0.011017	2
0.006949	4	Alloprevotella	0.008742	3	Salinispora	0.00593	5	Beijerinckia	0.006404	6	Azorhizobium	0.008028	8	Candidatus Sulcia	0.006807	3	Edwardsiella	0.007273	3	Methanomicrobium	0.009013	3	Ensifer	0.007234	2	Myxosarcina	0.008297	7	0.002243	138	Afipia	Fibrisoma	0.011017	2
0.006949	4	Fictibacillus	0.008742	3	Tistrella	0.00593	5	Eikenella	0.006404	6	Pelobacter	0.008028	8	Niastella	0.006807	3	Pasteurella	0.007273	3	Methanosarcina	0.009013	3	Alishewanella	0.007234	2	Polaribacter	0.008297	7	0.002243	138	Chthoniobacter	Pedosphaera	0.011017	2
0.006949	4	Phaeodactylibacter	0.008742	3	Methylocapsa	0.00593	5	Enterobacter	0.006404	6	Methylomonas	0.008028	8	Natranaerobius	0.006807	3	Desulfuromonas	0.007273	3	Methanolobus	0.009013	3	Alkaliphilus	0.007234	2	Janibacter	0.008297	7	0.002243	138	Actinomycetospora	Anaerosalibacter	0.011017	2
0.006949	4	Gimesia	0.008742	3	Conexibacter	0.00593	5	Edwardsiella	0.006404	6	Chromobacterium	0.008028	8	Niabella	0.006807	3	Desulfomicrobium	0.007273	3	Methanosphaera	0.009013	3	Granulicatella	0.007234	2	Ignicoccus	0.008297	7	0.002227	137	Rickettsia	Desulfatiglans	0.011017	2
0.006949	4	Gemmatirosa	0.008742	3	Methanocaldococcus	0.00593	5	Desulfomicrobium	0.006404	6	Escherichia	0.008028	8	Methanoregula	0.006807	3	Megasphaera	0.007273	3	Haliscomenobacter	0.009013	3	Roseomonas	0.007234	2	Ferroglobus	0.008297	7	0.002227	137	Synechocystis	Pseudothermotoga	0.011017	2
0.006949	4	Peptoanaerobacter	0.008742	3	Halobiforma	0.00593	5	Megasphaera	0.006404	6	Xenorhabdus	0.008028	8	Zunongwangia	0.006807	3	Thiobacillus	0.007273	3	Roseobacter	0.009013	3	Anoxybacillus	0.007234	2	Planktothrix	0.008297	7	0.002227	137	Listeria	Gimesia	0.011017	2
0.005212	3	Azorhizobium	0.008742	3	Kineosphaera	0.00593	5	Ehrlichia	0.006404	6	Megasphaera	0.008028	8	Mucilaginibacter	0.006807	3	Bdellovibrio	0.007273	3	Sphingobacterium	0.009013	3	Oceanicaulis	0.007234	2	Aneurinibacillus	0.008297	7	0.002227	137	Nesterenkonia	Rubinisphaera	0.011017	2
0.005212	3	Dictyoglomus	0.008742	3	Desulfatibacillum	0.00593	5	Rhodobacter	0.006404	6	Nitrosomonas	0.008028	8	Oscillibacter	0.006807	3	Sporocytophaga	0.007273	3	Thermoanaerobacterium	0.009013	3	Cellulosimicrobium	0.007234	2	Leucobacter	0.008297	7	0.002227	137	Methanolacinia	Pseudooceanicola	0.011017	2
0.005212	3	Methylophilus	0.008742	3	Mastigocladopsis	0.00593	5	Prosthecochloris	0.006404	6	Thiobacillus	0.008028	8	Aliivibrio	0.006807	3	Microscilla	0.007273	3	Natronococcus	0.009013	3	Nodularia	0.007234	2	Cylindrospermum	0.007111	6	0.002194	135	Thermanaerovibrio	Azorhizobium	0.011017	2
0.005212	3	Flectobacillus	0.008742	3	Hylemonella	0.00593	5	Chloroflexus	0.006404	6	Bdellovibrio	0.008028	8	Pseudogulbenkiania	0.006807	3	Thiothrix	0.007273	3	Helcococcus	0.009013	3	Haliangium	0.007234	2	Halorubrum	0.007111	6	0.002178	134	Micrococcus	Dictyoglomus	0.011017	2
0.005212	3	Pirellula	0.008742	3	Anaerolinea	0.00593	5	Porphyrobacter	0.006404	6	Sporocytophaga	0.008028	8	Paraprevotella	0.006807	3	Rhodobacter	0.007273	3	Sebaldella	0.009013	3	Arenibacter	0.007234	2	Thiorhodococcus	0.007111	6	0.002162	133	Planococcus	Stigmatella	0.011017	2
0.005212	3	Xanthobacter	0.008742	3	Methylohalobius	0.00593	5	Peptostreptococcus	0.006404	6	Afipia	0.008028	8	Thermogemmatispora	0.006807	3	Chlorogloeopsis	0.007273	3	Kingella	0.009013	3	Microvirga	0.007234	2	Glycomyces	0.007111	6	0.002162	133	Gemmatirosa	Herpetosiphon	0.011017	2
0.005212	3	Chromobacterium	0.008742	3	Nitratireductor	0.00593	5	Thermoanaerobacter	0.006404	6	Pseudanabaena	0.008028	8	Marivirga	0.006807	3	Synechocystis	0.007273	3	Halothermothrix	0.009013	3	Dorea	0.007234	2	Spirillospora	0.007111	6	0.002145	132	Spiroplasma	Francisella	0.011017	2
0.005212	3	Citrobacter	0.008742	3	Crocinitomix	0.00593	5	Actinopolyspora	0.006404	6	Trichodesmium	0.008028	8	Candidatus Zinderia	0.006807	3	Spirulina	0.007273	3	Coprococcus	0.009013	3	Collimonas	0.007234	2	Dehalococcoides	0.007111	6	0.002145	132	Magnetospirillum	Xanthobacter	0.011017	2
0.005212	3	Coxiella	0.008742	3	Algoriphagus	0.00593	5	Archaeoglobus	0.006404	6	Nitrosococcus	0.008028	8	Hamadaea	0.006807	3	Nostoc	0.007273	3	Rahnella	0.009013	3	Longispora	0.007234	2	Methylopila	0.007111	6	0.002129	131	Erwinia	Comamonas	0.011017	2
0.005212	3	Bdellovibrio	0.008742	3	Aestuariibacter	0.00593	5	Thermotoga	0.006404	6	Sporosarcina	0.008028	8	Gilliamella	0.006807	3	Nitrospira	0.007273	3	Nitrosospira	0.009013	3	Enhygromyxa	0.007234	2	Actinoalloteichus	0.007111	6	0.002129	131	Methanobrevibacter	Moraxella	0.011017	2
0.005212	3	Cytophaga	0.008742	3	Arsenicicoccus	0.00593	5	Haliscomenobacter	0.006404	6	Ureaplasma	0.008028	8	Lunatimonas	0.006807	3	Micrococcus	0.007273	3	Acetivibrio	0.009013	3	Desulfatibacillum	0.007234	2	Roseovarius	0.007111	6	0.002129	131	Phaeospirillum	Alcaligenes	0.011017	2
0.005212	3	Rhodobacter	0.008742	3	Thioclava	0.00593	5	Desulfomonile	0.006404	6	Methanocorpusculum	0.007025	7	Pelobacter	0.006807	3	Gemella	0.007273	3	Dermabacter	0.009013	3	Reinekea	0.007234	2	Ferroplasma	0.007111	6	0.002129	131	Ensifer	Citrobacter	0.011017	2
0.005212	3	Rhodospirillum	0.008742	3	Truepera	0.00593	5	Heliobacterium	0.006404	6	Methanolobus	0.007025	7	Xanthobacter	0.006807	3	Atopobium	0.007273	3	Desulfitobacterium	0.009013	3	Nitratireductor	0.007234	2	Duganella	0.007111	6	0.002129	131	Vulcanisaeta	Proteus	0.011017	2
0.005212	3	Pelodictyon	0.008742	3	Desulfovermiculus	0.00593	5	Desulfobacula	0.006404	6	Desulfobacter	0.007025	7	Gluconobacter	0.006807	3	Clavibacter	0.007273	3	Candidatus Magnetobacterium	0.009013	3	Algoriphagus	0.007234	2	Neptunomonas	0.007111	6	0.002129	131	Salinispora	Fibrobacter	0.011017	2
0.005212	3	Chloroflexus	0.008742	3	Niastella	0.00593	5	Thauera	0.006404	6	Thermosipho	0.007025	7	Ochrobactrum	0.006807	3	Streptosporangium	0.007273	3	Methylophaga	0.009013	3	Gulosibacter	0.007234	2	Thermocrinis	0.007111	6	0.002129	131	Enterovibrio	Desulfuromonas	0.011017	2
0.005212	3	Porphyrobacter	0.008742	3	Candidatus Jettenia	0.00593	5	Candidatus Phytoplasma	0.006404	6	Roseobacter	0.007025	7	Zymomonas	0.006807	3	Tsukamurella	0.007273	3	Actinosynnema	0.009013	3	Rhodopirellula	0.007234	2	Succinispira	0.007111	6	0.002113	130	Alteromonas	Thiothrix	0.011017	2
0.005212	3	Anabaena	0.008742	3	Flaviramulus	0.00593	5	Acidobacterium	0.006404	6	Gardnerella	0.007025	7	Megasphaera	0.006807	3	Methanococcus	0.007273	3	Metallosphaera	0.009013	3	Serinicoccus	0.007234	2	Corallococcus	0.007111	6	0.002113	130	Providencia	Leuconostoc	0.011017	2
0.005212	3	Nitrospira	0.008742	3	Natranaerobius	0.00593	5	Liberibacter	0.006404	6	Acidovorax	0.007025	7	Beggiatoa	0.006807	3	Methanosarcina	0.007273	3	Ferrimonas	0.009013	3	Leeuwenhoekiella	0.007234	2	Slackia	0.007111	6	0.002113	130	Xenococcus	Thermoanaerobacter	0.011017	2
0.005212	3	Listeria	0.008742	3	Methyloversatilis	0.00593	5	Nitrosospira	0.006404	6	Sulfobacillus	0.007025	7	Planococcus	0.006807	3	Methanolobus	0.007273	3	Caloramator	0.009013	3	Stackebrandtia	0.007234	2	Hippea	0.007111	6	0.002097	129	Chelatococcus	Streptosporangium	0.011017	2
0.005212	3	Kurthia	0.008742	3	Methanoregula	0.00593	5	Nitrospina	0.006404	6	Phyllobacterium	0.007025	7	Thermoactinomyces	0.006807	3	Methanosaeta	0.007273	3	Devosia	0.009013	3	Thioclava	0.007234	2	Sodalis	0.007111	6	0.002097	129	Actinosynnema	Thermoactinomyces	0.011017	2
0.005212	3	Thermoactinomyces	0.008742	3	Sphaerochaeta	0.00593	5	Dialister	0.006404	6	Natronococcus	0.007025	7	Aeromicrobium	0.006807	3	Haloarcula	0.007273	3	Mitsuokella	0.009013	3	Alkaliflexus	0.007234	2	Thermicanus	0.007111	6	0.002097	129	Knoellia	Halococcus	0.011017	2
0.005212	3	Curtobacterium	0.008742	3	Lysinibacillus	0.00593	5	Microcoleus	0.006404	6	Syntrophobacter	0.007025	7	Desulfobacter	0.006807	3	Hirschia	0.007273	3	Polaribacter	0.009013	3	Algicola	0.007234	2	Ruegeria	0.007111	6	0.002097	129	Ramlibacter	Methanoplanus	0.011017	2
0.005212	3	Methanospirillum	0.008742	3	Actinomycetospora	0.00593	5	Oenococcus	0.006404	6	Rahnella	0.007025	7	Sporomusa	0.006807	3	Carnobacterium	0.007273	3	Lamprocystis	0.009013	3	Herminiimonas	0.007234	2	Alkalibacterium	0.007111	6	0.00208	128	Dyadobacter	Acidianus	0.011017	2
0.005212	3	Sulfolobus	0.008742	3	Catenulispora	0.00593	5	Myxosarcina	0.006404	6	Sporichthya	0.007025	7	Thermosipho	0.006807	3	Sulfobacillus	0.007273	3	Nakamurella	0.009013	3	Prolixibacter	0.007234	2	Chloroherpeton	0.007111	6	0.00208	128	Skermanella	Azoarcus	0.011017	2
0.005212	3	Desulfobacterium	0.008742	3	Desulfurivibrio	0.00593	5	Lamprocystis	0.006404	6	Stenotrophomonas	0.007025	7	Acidovorax	0.006807	3	Acidothermus	0.007273	3	Acidimicrobium	0.009013	3	Sideroxydans	0.007234	2	Coprobacillus	0.007111	6	0.002048	126	Chloroflexus	Helcococcus	0.011017	2
0.005212	3	Methanoplanus	0.008742	3	Robiginitomaculum	0.00593	5	Dehalococcoides	0.006404	6	Candidatus Microthrix	0.007025	7	Buchnera	0.006807	3	Lachnospira	0.007273	3	Ferroglobus	0.009013	3	Saccharophagus	0.007234	2	Stanieria	0.007111	6	0.002032	125	Janibacter	Riemerella	0.011017	2
0.005212	3	Halanaerobium	0.008742	3	Coraliomargarita	0.00593	5	Thiorhodovibrio	0.006404	6	Devosia	0.007025	7	Coprococcus	0.006807	3	Rubrivivax	0.007273	3	Kocuria	0.009013	3	Cohnella	0.007234	2	Leifsonia	0.007111	6	0.002015	124	Haliscomenobacter	Sporichthya	0.011017	2
0.005212	3	Desulfomonile	0.008742	3	Henriciella	0.00593	5	Desulfurobacterium	0.006404	6	Psychroserpens	0.007025	7	Dialister	0.006807	3	Phyllobacterium	0.007273	3	Sulfurospirillum	0.009013	3	Fluviicola	0.007234	2	Tolypothrix	0.007111	6	0.002015	124	Devosia	Dactylosporangium	0.005508	1
0.005212	3	Sporomusa	0.008742	3	Singulisphaera	0.00593	5	Dechloromonas	0.006404	6	Gelidibacter	0.007025	7	Ferrimonas	0.006807	3	Thermoanaerobacterium	0.007273	3	Rickettsiella	0.009013	3	Truepera	0.007234	2	Candidatus Carsonella	0.007111	6	0.002015	124	Tepidicaulis	Kineosporia	0.005508	1
0.005212	3	Brochothrix	0.008742	3	Bibersteinia	0.00593	5	Duganella	0.006404	6	Myxosarcina	0.007025	7	Caloramator	0.006807	3	Photorhabdus	0.007273	3	Sanguibacter	0.009013	3	Ignisphaera	0.007234	2	Actinopolymorpha	0.007111	6	0.001999	123	Candidatus Solibacter	Psychroserpens	0.005508	1
0.005212	3	Phyllobacterium	0.008742	3	Desulfonatronospira	0.00593	5	Myroides	0.006404	6	Xenococcus	0.007025	7	Psychroserpens	0.006807	3	Syntrophobacter	0.007273	3	Holdemania	0.009013	3	Goodfellowiella	0.007234	2	Granulicatella	0.007111	6	0.001983	122	Lachnospira	Spirillospora	0.005508	1
0.005212	3	Acetohalobium	0.008742	3	Syntrophorhabdus	0.00593	5	Tatumella	0.006404	6	Lamprocystis	0.007025	7	Thiorhodococcus	0.006807	3	Rhodothermus	0.007273	3	Borreliella	0.009013	3	Rhodonellum	0.007234	2	Acidithiobacillus	0.007111	6	0.001983	122	Polaromonas	Dehalococcoides	0.005508	1
0.005212	3	Desulfobacula	0.008742	3	Spongiibacter	0.00593	5	Pseudoxanthomonas	0.006404	6	Deferribacter	0.007025	7	Dehalococcoides	0.006807	3	Agromyces	0.007273	3	Actinoalloteichus	0.009013	3	Methylotenera	0.007234	2	Roseomonas	0.007111	6	0.001983	122	Cellulosimicrobium	Waddlia	0.005508	1
0.005212	3	Microlunatus	0.008742	3	Phycisphaera	0.00593	5	Marichromatium	0.006404	6	Planktothrix	0.007025	7	Borreliella	0.006807	3	Acidobacterium	0.007273	3	Waddlia	0.009013	3	Candidatus Jettenia	0.007234	2	Oceanimonas	0.007111	6	0.001983	122	Oceanobacillus	Myroides	0.005508	1
0.005212	3	Syntrophobacter	0.008742	3	Fibrisoma	0.00593	5	Marmoricola	0.006404	6	Holdemania	0.007025	7	Roseovarius	0.006807	3	Kineococcus	0.007273	3	Gracilibacillus	0.009013	3	Patulibacter	0.007234	2	Natronorubrum	0.007111	6	0.001967	121	Fluoribacter	Psychroflexus	0.005508	1
0.005212	3	Rhodothermus	0.008742	3	Sulfuricella	0.00593	5	Ruegeria	0.006404	6	Rhodanobacter	0.007025	7	Gracilibacillus	0.006807	3	Nitrospina	0.007273	3	Duganella	0.009013	3	Verminephrobacter	0.007234	2	Thermacetogenium	0.007111	6	0.001967	121	Rheinheimera	Luteimonas	0.005508	1
0.005212	3	Leptonema	0.008742	3	Chthonomonas	0.00593	5	Collinsella	0.006404	6	Thermocrinis	0.007025	7	Pseudoxanthomonas	0.006807	3	Bilophila	0.007273	3	Halothece	0.009013	3	Belnapia	0.007234	2	Massilia	0.007111	6	0.001967	121	Kozakia	Verrucosispora	0.005508	1
0.005212	3	Halothermothrix	0.008742	3	Commensalibacter	0.00593	5	Cyanobacterium	0.006404	6	Phaeospirillum	0.007025	7	Pandoraea	0.006807	3	Desulfitobacterium	0.007273	3	Tatumella	0.009013	3	Actinocatenispora	0.007234	2	Anoxybacillus	0.007111	6	0.00195	120	Cylindrospermopsis	Natrinema	0.005508	1
0.005212	3	Agromyces	0.008742	3	Peptoclostridium	0.00593	5	Ensifer	0.006404	6	Natrinema	0.007025	7	Roseivivax	0.006807	3	Actinokineospora	0.007273	3	Parachlamydia	0.009013	3	Desulfurispirillum	0.007234	2	Dysgonomonas	0.007111	6	0.00195	120	Roseivivax	Oligella	0.005508	1
0.005212	3	Neorickettsia	0.008742	3	Chitinivibrio	0.00593	5	Alishewanella	0.006404	6	Haloterrigena	0.007025	7	Oscillochloris	0.006807	3	Metallosphaera	0.007273	3	Luteimonas	0.009013	3	Actinomycetospora	0.007234	2	Cedecea	0.007111	6	0.001934	119	Methanosarcina	Ruegeria	0.005508	1
0.005212	3	Rhodovulum	0.008742	3	Intestinibacter	0.00593	5	Carboxydothermus	0.006404	6	Knoellia	0.007025	7	Salegentibacter	0.006807	3	Johnsonella	0.007273	3	Verrucosispora	0.009013	3	Solimonas	0.007234	2	Methylosarcina	0.007111	6	0.001934	119	Rubrivivax	Alishewanella	0.005508	1
0.005212	3	Liberibacter	0.008742	3	Planctopirus	0.00593	5	Alkalilimnicola	0.006404	6	Megamonas	0.007025	7	Lechevalieria	0.006807	3	Microbulbifer	0.007273	3	Oligella	0.009013	3	Caenispirillum	0.007234	2	Cyanobium	0.007111	6	0.001934	119	Agromyces	Candidatus Carsonella	0.005508	1
0.005212	3	Bilophila	0.008742	3	Tepidicaulis	0.00593	5	Oceanicaulis	0.006404	6	Lechevalieria	0.007025	7	Opitutus	0.006807	3	Salinivibrio	0.007273	3	Roseivivax	0.009013	3	Oscillibacter	0.007234	2	Laribacter	0.007111	6	0.001934	119	Sanguibacter	Actinopolymorpha	0.005508	1
0.005212	3	Ewingella	0.008742	3	Paeniglutamicibacter	0.00593	5	Methylosarcina	0.006404	6	Ilyobacter	0.007025	7	Dorea	0.006807	3	Lamprocystis	0.007273	3	Chloroherpeton	0.009013	3	Singulisphaera	0.007234	2	Thalassospira	0.007111	6	0.001918	118	Thiothrix	Cellulosimicrobium	0.005508	1
0.005212	3	Brachybacterium	0.008742	3	Lunatimonas	0.00593	5	Anaerococcus	0.006404	6	Gemmatimonas	0.007025	7	Sulfurihydrogenibium	0.006807	3	Octadecabacter	0.007273	3	Stanieria	0.009013	3	Bibersteinia	0.007234	2	Gemmatimonas	0.007111	6	0.001918	118	Lamprocystis	Sphingopyxis	0.005508	1
0.005212	3	Leucothrix	0.008742	3	Hugenholtzia	0.00593	5	Thalassospira	0.006404	6	Opitutus	0.007025	7	Methylohalobius	0.006807	3	Sulfurospirillum	0.007273	3	Gloeocapsa	0.009013	3	Desulfonatronospira	0.007234	2	Proteocatella	0.007111	6	0.001918	118	Psychromonas	Salinisphaera	0.005508	1
0.005212	3	Geovibrio	0.005828	2	Pirellula	0.00593	5	Anaerophaga	0.006404	6	Caldithrix	0.007025	7	Jiangella	0.006807	3	Moritella	0.007273	3	Ensifer	0.009013	3	Geminicoccus	0.007234	2	Rubritepida	0.007111	6	0.001918	118	Aminomonas	Enterovibrio	0.005508	1
0.005212	3	Mesoplasma	0.005828	2	Leptospirillum	0.00593	5	Proteocatella	0.006404	6	Conexibacter	0.007025	7	Desulfitibacter	0.006807	3	Glycomyces	0.007273	3	Oceanimonas	0.009013	3	Methanocella	0.007234	2	Terasakiella	0.007111	6	0.001918	118	Haliangium	Collimonas	0.005508	1
0.005212	3	Dethiosulfovibrio	0.005828	2	Methylomonas	0.00593	5	Microvirga	0.006404	6	Parvularcula	0.007025	7	Elizabethkingia	0.006807	3	Methylopila	0.007273	3	Natronorubrum	0.009013	3	Hellea	0.007234	2	Longispora	0.007111	6	0.001918	118	Anaerococcus	Saccharibacter	0.005508	1
0.005212	3	Kineosporia	0.005828	2	Eikenella	0.00593	5	Nautilia	0.006404	6	Enhygromyxa	0.007025	7	Prolixibacter	0.006807	3	Desulfonatronum	0.007273	3	Halonatronum	0.009013	3	Amorphus	0.007234	2	Sulfurihydrogenibium	0.007111	6	0.001918	118	Pacificimonas	Crocinitomix	0.005508	1
0.005212	3	Gelidibacter	0.005828	2	Erwinia	0.00593	5	Croceibacter	0.006404	6	Thermodesulfobium	0.007025	7	Fluviicola	0.006807	3	Brenneria	0.007273	3	Starkeya	0.009013	3	Spongiibacter	0.007234	2	Thermodesulfobium	0.007111	6	0.001902	117	Thermodesulfobacterium	Blastopirellula	0.005508	1
0.005212	3	Polaribacter	0.005828	2	Klebsiella	0.00593	5	Kordia	0.006404	6	Reinekea	0.007025	7	Nitrosopumilus	0.006807	3	Methylocaldum	0.007273	3	Nodularia	0.009013	3	Paraoerskovia	0.007234	2	Reinekea	0.007111	6	0.001902	117	Longispora	Hoeflea	0.005508	1
0.005212	3	Ignicoccus	0.005828	2	Xenorhabdus	0.00593	5	Mastigocladopsis	0.006404	6	Dyella	0.007025	7	Patulibacter	0.006807	3	Roseovarius	0.007273	3	Hydrogenobaculum	0.009013	3	Celeribacter	0.007234	2	Saccharibacter	0.007111	6	0.001885	116	Parvularcula	Stackebrandtia	0.005508	1
0.005212	3	Cylindrospermum	0.005828	2	Pasteurella	0.00593	5	Jeotgalicoccus	0.006404	6	Thermodesulfatator	0.007025	7	Nonlabens	0.006807	3	Rhodanobacter	0.007273	3	Thalassospira	0.009013	3	Nodosilinea	0.007234	2	Dyella	0.007111	6	0.001885	116	Alkaliflexus	Thioclava	0.005508	1
0.005212	3	Kocuria	0.005828	2	Anaplasma	0.00593	5	Blastopirellula	0.006404	6	Oceanicola	0.007025	7	Pelosinus	0.006807	3	Thermocrinis	0.007273	3	Oceanobacillus	0.009013	3	Fictibacillus	0.007234	2	Methylohalobius	0.007111	6	0.001885	116	Solitalea	Algicola	0.005508	1
0.005212	3	Rickettsiella	0.005828	2	Rickettsia	0.00593	5	Arsenicicoccus	0.006404	6	Blastopirellula	0.007025	7	Fulvivirga	0.006807	3	Myroides	0.007273	3	Microvirga	0.009013	3	Anaerosalibacter	0.007234	2	Oceanicola	0.007111	6	0.001885	116	Anaerosalibacter	Pontibacter	0.005508	1
0.005212	3	Facklamia	0.005828	2	Desulfuromonas	0.00593	5	Jiangella	0.006404	6	Stackebrandtia	0.007025	7	Actinomycetospora	0.006807	3	Cylindrospermopsis	0.007273	3	Conexibacter	0.009013	3	Aliiglaciecola	0.007234	2	Maribacter	0.007111	6	0.001869	115	Isosphaera	Goodfellowiella	0.005508	1
0.005212	3	Waddlia	0.005828	2	Saprospira	0.00593	5	Odoribacter	0.006404	6	Segniliparus	0.007025	7	Solimonas	0.006807	3	Methylovorus	0.007273	3	Terasakiella	0.009013	3	Candidatus Latescibacter	0.007234	2	Isoptericola	0.007111	6	0.001869	115	Desulfobulbus	Halopiger	0.005508	1
0.005212	3	Beutenbergia	0.005828	2	Thiothrix	0.00593	5	Stackebrandtia	0.006404	6	Desulfitibacter	0.007025	7	Desulfurivibrio	0.006807	3	Tatumella	0.007273	3	Methanocaldococcus	0.009013	3	Erysipelatoclostridium	0.007234	2	Agarivorans	0.007111	6	0.001869	115	Teredinibacter	Echinicola	0.005508	1
0.005212	3	Rhodovibrio	0.005828	2	Rhodobacter	0.00593	5	Advenella	0.006404	6	Adhaeribacter	0.007025	7	Mesoflavibacter	0.006807	3	Virgibacillus	0.007273	3	Halobiforma	0.009013	3	Pararhodospirillum	0.007234	2	Kangiella	0.007111	6	0.001869	115	Marinobacterium	Sphaerochaeta	0.005508	1
0.005212	3	Marmoricola	0.005828	2	Pelodictyon	0.00593	5	Gramella	0.006404	6	Nitrosopumilus	0.007025	7	Nitrososphaera	0.006807	3	Natrinema	0.007273	3	Parvularcula	0.009013	3	Gimesia	0.007234	2	Blastopirellula	0.007111	6	0.001869	115	Geobacillus	Catenulispora	0.005508	1
0.005212	3	Pseudaminobacter	0.005828	2	Chlorogloeopsis	0.00593	5	Candidatus Hepatoplasma	0.006404	6	Niastella	0.007025	7	Methylacidiphilum	0.006807	3	Glaciecola	0.007273	3	Sulfurihydrogenibium	0.009013	3	Planctopirus	0.007234	2	Sulfurovum	0.007111	6	0.001869	115	Scardovia	Humibacter	0.005508	1
0.005212	3	Methanomethylovorans	0.005828	2	Peptostreptococcus	0.00593	5	Elizabethkingia	0.006404	6	Flaviramulus	0.007025	7	Ignavibacterium	0.006807	3	Pandoraea	0.007273	3	Desulfatibacillum	0.009013	3	Pseudodonghicola	0.007234	2	Nitrincola	0.007111	6	0.001853	114	Prolixibacter	Kiloniella	0.005508	1
0.005212	3	Ensifer	0.005828	2	Micrococcus	0.00593	5	Prolixibacter	0.006404	6	Rudanella	0.007025	7	Melioribacter	0.006807	3	Alkalibacterium	0.007273	3	Formosa	0.009013	3	Rubinisphaera	0.007234	2	Nitratiruptor	0.007111	6	0.001837	113	Rhodospirillum	Balneola	0.005508	1
0.005212	3	Halothiobacillus	0.005828	2	Planococcus	0.00593	5	Dokdonia	0.006404	6	Geminicoccus	0.007025	7	Mesotoga	0.006807	3	Acidilobus	0.007273	3	Belliella	0.009013	3	Actinotignum	0.007234	2	Candidatus Amoebophilus	0.007111	6	0.001837	113	Ornithinimicrobium	Methanocella	0.005508	1
0.005212	3	Zobellia	0.005828	2	Sporosarcina	0.00593	5	Olleya	0.006404	6	Methylacidiphilum	0.007025	7	Phaseolibacter	0.006807	3	Denitrovibrio	0.007273	3	Hylemonella	0.009013	3	Gemmatirosa	0.007234	2	Sulfuricurvum	0.007111	6	0.001804	111	Phycicoccus	Sciscionella	0.005508	1
0.005212	3	Chrysiogenes	0.005828	2	Erysipelothrix	0.00593	5	Niastella	0.006404	6	Pseudogulbenkiania	0.007025	7	Candidatus Methanoperedens	0.006807	3	Xenophilus	0.007273	3	Luteibacter	0.009013	3	Euryhalocaulis	0.007234	2	Segniliparus	0.007111	6	0.001804	111	Rudanella	Paenisporosarcina	0.005508	1
0.005212	3	Acidithiobacillus	0.005828	2	Kurthia	0.00593	5	Galbibacter	0.006404	6	Paraprevotella	0.007025	7	Komagataeibacter	0.006807	3	Ahrensia	0.007273	3	Hydrocarboniphaga	0.009013	3	Lunatimonas	0.007234	2	Acaricomes	0.007111	6	0.001788	110	Leptospirillum	Hoyosella	0.005508	1
0.005212	3	Oceanimonas	0.005828	2	Eubacterium	0.00593	5	Terriglobus	0.006404	6	Candidatus Koribacter	0.007025	7	Romboutsia	0.006807	3	Gallibacterium	0.007273	3	Nitratireductor	0.009013	3	Acidipropionibacterium	0.007234	2	Desulfitibacter	0.007111	6	0.001772	109	Actinopolyspora	Chthonomonas	0.005508	1
0.005212	3	Limnobacter	0.005828	2	Propionibacterium	0.00593	5	Actinomycetospora	0.006404	6	Geminocystis	0.007025	7	Phaeodactylibacter	0.006807	3	Sphingopyxis	0.007273	3	Grimontia	0.009013	3	Cutibacterium	0.007234	2	Proteiniphilum	0.007111	6	0.001772	109	Pararhodospirillum	Nodosilinea	0.005508	1
0.005212	3	Halorhabdus	0.005828	2	Thermoanaerobacter	0.00593	5	Coraliomargarita	0.006404	6	Salinarimonas	0.007025	7	Caldisalinibacter	0.006807	3	Lechevalieria	0.007273	3	Maribacter	0.006009	2	Dictyoglomus	0.007234	2	Algicola	0.007111	6	0.001755	108	Propionibacterium	Fodinicurvata	0.005508	1
0.005212	3	Starkeya	0.005828	2	Actinopolyspora	0.00593	5	Rudanella	0.006404	6	Marivirga	0.007025	7	Pseudothermotoga	0.006807	3	Cyanobium	0.007273	3	Serinicoccus	0.006009	2	Borrelia	0.007234	2	Prolixibacter	0.007111	6	0.001755	108	Methanococcus	Mesotoga	0.005508	1
0.005212	3	Ahrensia	0.005828	2	Microtetraspora	0.00593	5	Parvimonas	0.006404	6	Candidatus Zinderia	0.007025	7	Candidatus Rubidus	0.006807	3	Ilyobacter	0.007273	3	Jiangella	0.006009	2	Azospirillum	0.007234	2	Truepera	0.007111	6	0.001755	108	Aminobacterium	Gorillibacterium	0.005508	1
0.005212	3	Megamonas	0.005828	2	Tropheryma	0.00593	5	Rubidibacter	0.006404	6	Gilvimarinus	0.007025	7	Clostridioides	0.006807	3	Laribacter	0.007273	3	Candidatus Protochlamydia	0.006009	2	Moraxella	0.007234	2	Sedimenticola	0.007111	6	0.001755	108	Catelliglobosispora	Gemmatirosa	0.005508	1
0.005212	3	Ureibacillus	0.005828	2	Tsukamurella	0.00593	5	Kosmotoga	0.006404	6	Pseudoflavonifractor	0.007025	7	Parageobacillus	0.006807	3	Thalassospira	0.007273	3	Leeuwenhoekiella	0.006009	2	Psychrobacter	0.007234	2	Paucisalibacillus	0.005926	5	0.001739	107	Methylibium	Flectobacillus	0.005508	1
0.005212	3	Methylosarcina	0.005828	2	Methanomicrobium	0.00593	5	Paenisporosarcina	0.006404	6	Fodinicurvata	0.007025	7	Candidatus Izimaplasma	0.006807	3	Halosimplex	0.007273	3	Thioclava	0.006009	2	Bordetella	0.007234	2	Meganema	0.005926	5	0.001723	106	Xanthobacter	Thermomicrobium	0.005508	1
0.005212	3	Salinispora	0.005828	2	Methanosarcina	0.00593	5	Candidatus Koribacter	0.006404	6	Mesotoga	0.007025	7	Peptoanaerobacter	0.006807	3	Salinisphaera	0.007273	3	Alkaliflexus	0.006009	2	Acidiphilium	0.007234	2	Castellaniella	0.005926	5	0.001723	106	Bilophila	Acidiphilium	0.005508	1
0.005212	3	Opitutus	0.005828	2	Methanolobus	0.00593	5	Coleofasciculus	0.006404	6	Nafulsella	0.007025	7	Bernardetia	0.006807	3	Proteocatella	0.007273	3	Aminiphilus	0.006009	2	Chromobacterium	0.007234	2	Methylotenera	0.005926	5	0.001723	106	Methylopila	Beijerinckia	0.005508	1
0.005212	3	Salinisphaera	0.005828	2	Natronobacterium	0.00593	5	Marivirga	0.006404	6	Alloprevotella	0.006021	6	Dictyoglomus	0.006807	3	Aurantimonas	0.007273	3	Endozoicomonas	0.006009	2	Klebsiella	0.007234	2	Pelosinus	0.005926	5	0.001723	106	Martelella	Escherichia	0.005508	1
0.005212	3	Persephonella	0.005828	2	Thermofilum	0.00593	5	Hamadaea	0.006404	6	Paenirhodobacter	0.006021	6	Methylomonas	0.006807	3	Caldithrix	0.007273	3	Pusillimonas	0.006009	2	Morganella	0.007234	2	Belnapia	0.005926	5	0.001707	105	Arsenicicoccus	Klebsiella	0.005508	1
0.005212	3	Dorea	0.005828	2	Thermoplasma	0.00593	5	Fodinicurvata	0.006404	6	Romboutsia	0.006021	6	Moraxella	0.006807	3	Longispora	0.007273	3	Pontibacter	0.006009	2	Providencia	0.007234	2	Phycicoccus	0.005926	5	0.001707	105	Nitratifractor	Xenorhabdus	0.005508	1
0.005212	3	Caldimonas	0.005828	2	Desulfomonile	0.00593	5	Mariniradius	0.006404	6	Desulfatiglans	0.006021	6	Beijerinckia	0.006807	3	Skermanella	0.007273	3	Dokdonia	0.006009	2	Yersinia	0.007234	2	Olivibacter	0.005926	5	0.001707	105	Ruania	Oxalobacter	0.005508	1
0.005212	3	Collimonas	0.005828	2	Acetonema	0.00593	5	Anaerosalibacter	0.006404	6	Rubinisphaera	0.006021	6	Proteus	0.006807	3	Enhydrobacter	0.007273	3	Cohnella	0.006009	2	Fibrobacter	0.007234	2	Mariprofundus	0.005926	5	0.001707	105	Novispirillum	Pediococcus	0.005508	1
0.005212	3	Halobiforma	0.005828	2	Fervidobacterium	0.00593	5	Pseudobacteroides	0.006404	6	Halobacteriovorax	0.006021	6	Xenorhabdus	0.006807	3	Chamaesiphon	0.007273	3	Halalkalicoccus	0.006009	2	Desulfuromonas	0.007234	2	Methyloversatilis	0.005926	5	0.001674	103	Nitrosomonas	Kurthia	0.005508	1
0.005212	3	Kineosphaera	0.005828	2	Hirschia	0.00593	5	Anditalea	0.006404	6	Pseudooceanicola	0.006021	6	Pasteurella	0.006807	3	Kordia	0.007273	3	Olleya	0.006009	2	Megasphaera	0.007234	2	Niabella	0.005926	5	0.001674	103	Cyclobacterium	Methanosaeta	0.005508	1
0.005212	3	Saccharibacter	0.005828	2	Magnetospirillum	0.00593	5	Terrisporobacter	0.006404	6	Paraclostridium	0.006021	6	Saprospira	0.006807	3	Anaerolinea	0.007273	3	Candidatus Sulcia	0.006009	2	Thiobacillus	0.007234	2	Aestuariimicrobium	0.005926	5	0.001674	103	Nonomuraea	Desulfobacter	0.005508	1
0.005212	3	Hylemonella	0.005828	2	Lyngbya	0.00593	5	Saccharicrinis	0.006404	6	Candidatus Rubidus	0.006021	6	Porphyrobacter	0.006807	3	Caldilinea	0.007273	3	Desulfovermiculus	0.006009	2	Sporocytophaga	0.007234	2	Fulvivirga	0.005926	5	0.001674	103	Hippea	Methanosphaera	0.005508	1
0.005212	3	Nitratireductor	0.005828	2	Sinorhizobium	0.00593	5	Pseudopedobacter	0.006404	6	Hugenholtzia	0.006021	6	Trichodesmium	0.006807	3	Crinalium	0.007273	3	Paludibacter	0.006009	2	Ectothiorhodospira	0.007234	2	Andreprevotia	0.005926	5	0.001674	103	Methanomethylovorans	Thermotoga	0.005508	1
0.005212	3	Pseudovibrio	0.005828	2	Acetohalobium	0.00593	5	Gorillibacterium	0.005337	5	Dictyoglomus	0.006021	6	Leuconostoc	0.006807	3	Crocinitomix	0.007273	3	Methylotenera	0.006009	2	Thiocapsa	0.007234	2	Caenispirillum	0.005926	5	0.001674	103	Tuberibacillus	Fervidobacterium	0.005508	1
0.005212	3	Arsenicicoccus	0.005828	2	Herbidospora	0.00593	5	Clostridioides	0.005337	5	Flectobacillus	0.006021	6	Atopobium	0.006807	3	Maribacter	0.007273	3	Pelosinus	0.006009	2	Rhodobacter	0.007234	2	Aggregatibacter	0.005926	5	0.001658	102	Methanoplanus	Roseobacter	0.005508	1
0.005212	3	Geopsychrobacter	0.005828	2	Helcococcus	0.00593	5	Sediminispirochaeta	0.005337	5	Moraxella	0.006021	6	Saccharopolyspora	0.006807	3	Parvibaculum	0.007273	3	Rivularia	0.006009	2	Porphyrobacter	0.007234	2	Zunongwangia	0.005926	5	0.001658	102	Chroococcidiopsis	Cardiobacterium	0.005508	1
0.005212	3	Candidatus Amoebophilus	0.005828	2	Buchnera	0.00593	5	Peptoanaerobacter	0.005337	5	Pasteurella	0.006021	6	Pyrococcus	0.006807	3	Rhodopirellula	0.007273	3	Olivibacter	0.006009	2	Synechocystis	0.007234	2	Mucilaginibacter	0.005926	5	0.001658	102	Planktothrix	Sulfobacillus	0.005508	1
0.005212	3	Citreicella	0.005828	2	Kingella	0.00593	5	Hugenholtzia	0.005337	5	Roseburia	0.006021	6	Methanosphaera	0.006807	3	Serinicoccus	0.007273	3	Niabella	0.006009	2	Pediococcus	0.007234	2	Salsuginibacillus	0.005926	5	0.001658	102	Dechloromonas	Rhodoferax	0.005508	1
0.005212	3	Odoribacter	0.005828	2	Kinetoplastibacterium	0.004744	4	Phenylobacterium	0.005337	5	Oxalobacter	0.006021	6	Thermoanaerobacterium	0.006807	3	Thioclava	0.007273	3	Sphaerochaeta	0.006009	2	Peptostreptococcus	0.007234	2	Desulfurivibrio	0.005926	5	0.001658	102	Thermoanaerobaculum	Lyngbya	0.005508	1
0.005212	3	Leeuwenhoekiella	0.005828	2	Kineococcus	0.004744	4	Comamonas	0.005337	5	Ehrlichia	0.006021	6	Syntrophobacter	0.006807	3	Aminiphilus	0.007273	3	Solimonas	0.006009	2	Gemella	0.007234	2	Dethiobacter	0.005926	5	0.001642	101	Nitrospira	Natronococcus	0.005508	1
0.005212	3	Gramella	0.005828	2	Simkania	0.004744	4	Escherichia	0.005337	5	Rhodospirillum	0.006021	6	Phascolarctobacterium	0.006807	3	Lacinutrix	0.007273	3	Caenispirillum	0.006009	2	Renibacterium	0.007234	2	Kiloniella	0.005926	5	0.001642	101	Polaribacter	Microlunatus	0.005508	1
0.005212	3	Algicola	0.005828	2	Nitrosospira	0.004744	4	Salmonella	0.005337	5	Pelodictyon	0.006021	6	Acetobacterium	0.006807	3	Pusillimonas	0.007273	3	Catenulispora	0.006009	2	Erysipelothrix	0.007234	2	Chloracidobacterium	0.005926	5	0.001642	101	Succinivibrio	Photorhabdus	0.005508	1
0.005212	3	Olleya	0.005828	2	Nitrospina	0.004744	4	Pasteurella	0.005337	5	Porphyrobacter	0.006021	6	Candidatus Microthrix	0.006807	3	Truepera	0.007273	3	Robiginitomaculum	0.006009	2	Propionibacterium	0.007234	2	Neptuniibacter	0.005926	5	0.001642	101	Desulfurivibrio	Syntrophobacter	0.005508	1
0.005212	3	Criblamydia	0.005828	2	Actinosynnema	0.004744	4	Oxalobacter	0.005337	5	Spirulina	0.006021	6	Candidatus Arthromitus	0.006807	3	Olleya	0.007273	3	Desulfarculus	0.006009	2	Geodermatophilus	0.007234	2	Viridibacillus	0.005926	5	0.001642	101	Elioraea	Buchnera	0.005508	1
0.005212	3	Methylotenera	0.005828	2	Ewingella	0.004744	4	Nitrosomonas	0.005337	5	Planococcus	0.006021	6	Kineosporia	0.006807	3	Niastella	0.007273	3	Elioraea	0.006009	2	Mobiluncus	0.007234	2	Tepidanaerobacter	0.005926	5	0.001642	101	Afifella	Phascolarctobacterium	0.005508	1
0.005212	3	Pelosinus	0.005828	2	Candidatus Microthrix	0.004744	4	Saprospira	0.005337	5	Aerococcus	0.006021	6	Gelidibacter	0.006807	3	Nonlabens	0.007273	3	Neptuniibacter	0.006009	2	Tsukamurella	0.007234	2	Methanocella	0.005926	5	0.001642	101	Phycisphaera	Thauera	0.005508	1
0.005212	3	Natranaerobius	0.005828	2	Johnsonella	0.004744	4	Sporocytophaga	0.005337	5	Erysipelothrix	0.006021	6	Aneurinibacillus	0.006807	3	Pelosinus	0.007273	3	Singulisphaera	0.006009	2	Ureaplasma	0.007234	2	Hellea	0.005926	5	0.001625	100	Methylocystis	Kineococcus	0.005508	1
0.005212	3	Galbibacter	0.005828	2	Polynucleobacter	0.004744	4	Rhodospirillum	0.005337	5	Mobiluncus	0.006021	6	Cylindrospermum	0.006807	3	Belnapia	0.007273	3	Geminicoccus	0.006009	2	Methanolobus	0.007234	2	Haloferula	0.005926	5	0.001625	100	Megasphaera	Acetivibrio	0.005508	1
0.005212	3	Halopiger	0.005828	2	Mesoplasma	0.004744	4	Kurthia	0.005337	5	Thermotoga	0.006021	6	Thermaerobacter	0.006807	3	Haladaptatus	0.007273	3	Methylacidiphilum	0.006009	2	Methanosaeta	0.007234	2	Robinsoniella	0.005926	5	0.001625	100	Candidatus Paracaedibacter	Bilophila	0.005508	1
0.005212	3	Methanoregula	0.005828	2	Agrococcus	0.004744	4	Geodermatophilus	0.005337	5	Xylella	0.006021	6	Rhodanobacter	0.006807	3	Phycicoccus	0.007273	3	Sciscionella	0.006009	2	Haloferax	0.007234	2	Thalassobium	0.005926	5	0.001609	99	Halobacillus	Holophaga	0.005508	1
0.005212	3	Solimonas	0.005828	2	Picrophilus	0.004744	4	Ureaplasma	0.005337	5	Epulopiscium	0.006021	6	Duganella	0.006807	3	Galbibacter	0.007273	3	Maritalea	0.006009	2	Natronobacterium	0.007234	2	Chelonobacter	0.005926	5	0.001609	99	Natranaerobius	Candidatus Magnetobacterium	0.005508	1
0.005212	3	Salsuginibacillus	0.005828	2	Microbulbifer	0.004744	4	Methanococcoides	0.005337	5	Azoarcus	0.006021	6	Aminobacterium	0.006807	3	Sediminibacter	0.007273	3	Spongiibacter	0.006009	2	Pyrococcus	0.007234	2	Limnohabitans	0.005926	5	0.001609	99	Oscillibacter	Leucothrix	0.005508	1
0.005212	3	Humibacter	0.005828	2	Marinobacterium	0.004744	4	Haloferax	0.005337	5	Sinorhizobium	0.006021	6	Nonomuraea	0.006807	3	Sphaerochaeta	0.007273	3	Geminocystis	0.006009	2	Methanosphaera	0.007234	2	Fervidicoccus	0.005926	5	0.001609	99	Terrisporobacter	Oenococcus	0.005508	1
0.005212	3	Mesoflavibacter	0.005828	2	Psychroserpens	0.004744	4	Desulfurococcus	0.005337	5	Acetohalobium	0.006021	6	Oligella	0.006807	3	Humibacter	0.007273	3	Solitalea	0.006009	2	Teredinibacter	0.007234	2	Hoyosella	0.005926	5	0.001593	98	Beutenbergia	Acetomicrobium	0.005508	1
0.005212	3	Eudoraea	0.005828	2	Intrasporangium	0.004744	4	Desulfobacter	0.005337	5	Thermonema	0.006021	6	Alkalibacterium	0.006807	3	Desulfarculus	0.007273	3	Gilvimarinus	0.006009	2	Carnobacterium	0.007234	2	Halarchaeum	0.005926	5	0.00156	96	Thermofilum	Salinivibrio	0.005508	1
0.005212	3	Segetibacter	0.005828	2	Deferribacter	0.004744	4	Thermoplasma	0.005337	5	Desulfobacula	0.006021	6	Stanieria	0.006807	3	Bibersteinia	0.007273	3	Flavonifractor	0.006009	2	Synergistes	0.007234	2	Caldanaerobius	0.005926	5	0.00156	96	Sulfobacillus	Thiorhodococcus	0.005508	1
0.005212	3	Geminicoccus	0.005828	2	Octadecabacter	0.004744	4	Fervidobacterium	0.005337	5	Thermoanaerobacterium	0.006021	6	Ensifer	0.006807	3	Methylacidiphilum	0.007273	3	Pedosphaera	0.006009	2	Rubrivivax	0.007234	2	Halonotius	0.005926	5	0.00156	96	Curvibacter	Desulfonatronum	0.005508	1
0.005212	3	Calditerrivibrio	0.005828	2	Ignicoccus	0.004744	4	Gardnerella	0.005337	5	Microlunatus	0.006021	6	Leifsonia	0.006807	3	Sharpea	0.007273	3	Halolamina	0.006009	2	Lyngbya	0.007234	2	Rudaea	0.005926	5	0.00156	96	Haladaptatus	Dechloromonas	0.005508	1
0.005212	3	Butyricicoccus	0.005828	2	Ferroglobus	0.004744	4	Vagococcus	0.005337	5	Sebaldella	0.006021	6	Granulicatella	0.006807	3	Methanocella	0.007273	3	Catelliglobosispora	0.006009	2	Phyllobacterium	0.007234	2	Flavonifractor	0.005926	5	0.001544	95	Ureaplasma	Duganella	0.005508	1
0.005212	3	Sciscionella	0.005828	2	Chroococcidiopsis	0.004744	4	Magnetospirillum	0.005337	5	Phascolarctobacterium	0.006021	6	Thermosynechococcus	0.006807	3	Amorphus	0.007273	3	Gryllotalpicola	0.006009	2	Sinorhizobium	0.007234	2	Commensalibacter	0.005926	5	0.001544	95	Sporichthya	Thermocrinis	0.005508	1
0.005212	3	Bermanella	0.005828	2	Leucobacter	0.004744	4	Sulfobacillus	0.005337	5	Coprococcus	0.006021	6	Oceanicaulis	0.006807	3	Maritalea	0.007273	3	Oceaniovalibus	0.006009	2	Acetohalobium	0.007234	2	Hamadaea	0.005926	5	0.001528	94	Nitrococcus	Cylindrospermopsis	0.005508	1
0.005212	3	Paenisporosarcina	0.005828	2	Microvirgula	0.004744	4	Rhodoferax	0.005337	5	Thauera	0.006021	6	Aequorivita	0.006807	3	Limnohabitans	0.007273	3	Mariniradius	0.006009	2	Desulfobacula	0.007234	2	Cesiribacter	0.005926	5	0.001528	94	Halopiger	Chitinophaga	0.005508	1
0.005212	3	Hoyosella	0.005828	2	Kocuria	0.004744	4	Phyllobacterium	0.005337	5	Acidobacterium	0.006021	6	Methylosarcina	0.006807	3	Geminocystis	0.007273	3	Algiphilus	0.006009	2	Natronococcus	0.007234	2	Moorea	0.005926	5	0.001512	93	Bacteriovorax	Aminobacterium	0.005508	1
0.005212	3	Ignavibacterium	0.005828	2	Glycomyces	0.004744	4	Sinorhizobium	0.005337	5	Riemerella	0.006021	6	Cyanobium	0.006807	3	Fibrisoma	0.007273	3	Spiribacter	0.006009	2	Thiomonas	0.007234	2	Candidatus Methylomirabilis	0.005926	5	0.001512	93	Marivirga	Budvicia	0.005508	1
0.005212	3	Sulfuricella	0.005828	2	Rickettsiella	0.004744	4	Thiomonas	0.005337	5	Actinokineospora	0.006021	6	Kribbella	0.006807	3	Fodinicurvata	0.007273	3	Arenitalea	0.006009	2	Phascolarctobacterium	0.007234	2	Anaerosalibacter	0.005926	5	0.001495	92	Sporolactobacillus	Tatumella	0.005508	1
0.005212	3	Granulicella	0.005828	2	Empedobacter	0.004744	4	Leptonema	0.005337	5	Dialister	0.006021	6	Acetoanaerobium	0.006807	3	Cesiribacter	0.007273	3	Pararhodospirillum	0.006009	2	Coprococcus	0.007234	2	Candidatus Latescibacter	0.005926	5	0.001495	92	Halanaerobium	Nonomuraea	0.005508	1
0.005212	3	Mobilicoccus	0.005828	2	Dehalococcoides	0.004744	4	Kinetoplastibacterium	0.005337	5	Rubrobacter	0.006021	6	Enterovibrio	0.006807	3	Melioribacter	0.007273	3	Caldisalinibacter	0.006009	2	Thauera	0.007234	2	Thermoanaerobaculum	0.005926	5	0.001479	91	Wolinella	Modestobacter	0.005508	1
0.005212	3	Fimbriimonas	0.005828	2	Thiorhodovibrio	0.004744	4	Riemerella	0.005337	5	Halobacteroides	0.006021	6	Terasakiella	0.006807	3	Allokutzneria	0.007273	3	Planctopirus	0.006009	2	Riemerella	0.007234	2	Erysipelatoclostridium	0.005926	5	0.001479	91	Solimonas	Thermicanus	0.005508	1
0.005212	3	Pseudoflavonifractor	0.005828	2	Actinoalloteichus	0.004744	4	Blattabacterium	0.005337	5	Leucothrix	0.006021	6	Longispora	0.006807	3	Lachnoanaerobaculum	0.007273	3	Rubinisphaera	0.006009	2	Simkania	0.007234	2	Altibacter	0.005926	5	0.001463	90	Halothermothrix	Alkalibacterium	0.005508	1
0.005212	3	Candidatus Caldiarchaeum	0.005828	2	Aquamicrobium	0.004744	4	Arthrospira	0.005337	5	Kineosporia	0.006021	6	Reinekea	0.006807	3	Catenovulum	0.007273	3	Thermorudis	0.006009	2	Blattabacterium	0.007234	2	Faecalitalea	0.005926	5	0.001463	90	Desulfitobacterium	Methanomethylovorans	0.005508	1
0.005212	3	Halobellus	0.005828	2	Brenneria	0.004744	4	Methylophaga	0.005337	5	Chroococcidiopsis	0.006021	6	Hylemonella	0.006807	3	Gilliamella	0.007273	3	Gorillibacterium	0.006009	2	Sporichthya	0.007234	2	Asinibacterium	0.005926	5	0.001463	90	Actinoalloteichus	Pseudoramibacter	0.005508	1
0.005212	3	Chthonomonas	0.005828	2	Methylocaldum	0.004744	4	Candidatus Microthrix	0.005337	5	Nesterenkonia	0.006021	6	Thermodesulfatator	0.006807	3	Candidatus Stoquefichus	0.007273	3	Clostridioides	0.006009	2	Nitrococcus	0.007234	2	Saccharicrinis	0.005926	5	0.001463	90	Thermacetogenium	Natronorubrum	0.005508	1
0.005212	3	Commensalibacter	0.005828	2	Roseovarius	0.004744	4	Ferrimonas	0.005337	5	Sulfitobacter	0.006021	6	Oceanicola	0.006807	3	Draconibacterium	0.007273	3	Parageobacillus	0.006009	2	Nitrosospira	0.007234	2	Pseudothermotoga	0.005926	5	0.001463	90	Rubritepida	Methylosarcina	0.005508	1
0.005212	3	Deferrisoma	0.005828	2	Gracilibacillus	0.004744	4	Leucothrix	0.005337	5	Thiorhodovibrio	0.006021	6	Odoribacter	0.006807	3	Kamptonema	0.007273	3	Sediminispirochaeta	0.006009	2	Arthrospira	0.007234	2	Rubinisphaera	0.005926	5	0.001447	89	Microlunatus	Magnetococcus	0.005508	1
0.005212	3	Cesiribacter	0.005828	2	Duganella	0.004744	4	Mesoplasma	0.005337	5	Desulfurobacterium	0.006021	6	Thioclava	0.006807	3	Erysipelatoclostridium	0.007273	3	Hugenholtzia	0.006009	2	Acetivibrio	0.007234	2	Paeniglutamicibacter	0.005926	5	0.001447	89	Photorhabdus	Thalassospira	0.005508	1
0.005212	3	Melioribacter	0.005828	2	Mannheimia	0.004744	4	Orenia	0.005337	5	Borreliella	0.006021	6	Chthoniobacter	0.006807	3	Sedimentitalea	0.004849	2	Methylophilus	0.006009	2	Desulfitobacterium	0.007234	2	Pseudarthrobacter	0.005926	5	0.001447	89	Methylomicrobium	Tistrella	0.005508	1
0.005212	3	Catenovulum	0.005828	2	Methylovorus	0.004744	4	Picrophilus	0.005337	5	Meiothermus	0.006021	6	Pusillimonas	0.006807	3	Pararhodospirillum	0.004849	2	Herpetosiphon	0.006009	2	Methylophaga	0.007234	2	Candidatus Rubidus	0.005926	5	0.001447	89	Delftia	Gemmatimonas	0.005508	1
0.005212	3	Polycyclovorans	0.005828	2	Tatumella	0.004744	4	Acidocella	0.005337	5	Dechloromonas	0.006021	6	Emticicia	0.006807	3	Saccharicrinis	0.004849	2	Methylocystis	0.006009	2	Actinosynnema	0.007234	2	Clostridioides	0.005926	5	0.001447	89	Candidatus Koribacter	Persephonella	0.005508	1
0.005212	3	Anaerosalibacter	0.005828	2	Corallococcus	0.004744	4	Mitsuokella	0.005337	5	Myroides	0.006021	6	Dokdonia	0.006807	3	Chania	0.004849	2	Xanthobacter	0.006009	2	Promicromonospora	0.007234	2	Pseudorhizobium	0.005926	5	0.00143	88	Kamptonema	Marinithermus	0.005508	1
0.005212	3	Lutibaculum	0.005828	2	Psychroflexus	0.004744	4	Deferribacter	0.005337	5	Aminomonas	0.006021	6	Cohnella	0.006807	3	Candidatus Rubidus	0.004849	2	Alcaligenes	0.006009	2	Syntrophus	0.007234	2	Bernardetia	0.005926	5	0.001414	87	Acholeplasma	Jannaschia	0.005508	1
0.005212	3	Fervidicella	0.005828	2	Hippea	0.004744	4	Ignicoccus	0.005337	5	Corallococcus	0.006021	6	Candidatus Jettenia	0.004538	2	Methylobacillus	0.004849	2	Ochrobactrum	0.006009	2	Caldicellulosiruptor	0.003617	1	Methylophilus	0.005926	5	0.001414	87	Desulfosarcina	Parvularcula	0.005508	1
0.005212	3	Paenirhodobacter	0.005828	2	Allochromatium	0.004744	4	Chroococcidiopsis	0.005337	5	Slackia	0.006021	6	Uliginosibacterium	0.004538	2	Methylomonas	0.004849	2	Chromobacterium	0.006009	2	Ferrimonas	0.003617	1	Phenylobacterium	0.005926	5	0.001414	87	Borreliella	Chamaesiphon	0.005508	1
0.005212	3	Altibacter	0.005828	2	Halorhodospira	0.004744	4	Planktothrix	0.005337	5	Halorhodospira	0.006021	6	Aureimonas	0.004538	2	Acidiphilium	0.004849	2	Zymomonas	0.006009	2	Devosia	0.003617	1	Herpetosiphon	0.005926	5	0.001414	87	Virgibacillus	Thermodesulfatator	0.005508	1
0.005212	3	Pseudothermotoga	0.005828	2	Natrinema	0.004744	4	Cylindrospermum	0.005337	5	Bosea	0.006021	6	Humibacter	0.004538	2	Eikenella	0.004849	2	Klebsiella	0.006009	2	Gelidibacter	0.003617	1	Leptothrix	0.005926	5	0.001414	87	Anaerophaga	Rubellimicrobium	0.005508	1
0.005212	3	Franconibacter	0.005828	2	Thermicanus	0.004744	4	Glycomyces	0.005337	5	Marmoricola	0.006021	6	Coraliomargarita	0.004538	2	Zymomonas	0.004849	2	Ruminobacter	0.006009	2	Acidocella	0.003617	1	Pirellula	0.005926	5	0.001414	87	Methyloversatilis	Adhaeribacter	0.005508	1
0.005212	3	Pseudodonghicola	0.005828	2	Chloroherpeton	0.004744	4	Bergeyella	0.005337	5	Ensifer	0.006021	6	Shimazuella	0.004538	2	Hafnia	0.004849	2	Nitrobacter	0.006009	2	Polaribacter	0.003617	1	Methylocystis	0.005926	5	0.001398	86	Sebaldella	Methylibium	0.005508	1
0.005212	3	Rubinisphaera	0.005828	2	Muricauda	0.004744	4	Holdemania	0.005337	5	Desulfotalea	0.006021	6	Glaciibacter	0.004538	2	Nitrobacter	0.004849	2	Thiobacillus	0.006009	2	Planktothrix	0.003617	1	Azospirillum	0.005926	5	0.001398	86	Salinicoccus	Cohnella	0.005508	1
0.005212	3	Lunatimonas	0.005828	2	Ignatzschineria	0.004744	4	Methylocaldum	0.005337	5	Desulfotignum	0.006021	6	Zhouia	0.004538	2	Nitrosomonas	0.004849	2	Thiovulum	0.006009	2	Aeropyrum	0.003617	1	Brucella	0.005926	5	0.001398	86	Tenacibaculum	Fluviicola	0.005508	1
0.005212	3	Parageobacillus	0.005828	2	Acidithiobacillus	0.004744	4	Gracilibacillus	0.005337	5	Methylosarcina	0.006021	6	Haloferula	0.004538	2	Hydrogenobacter	0.004849	2	Hydrogenobacter	0.006009	2	Kytococcus	0.003617	1	Francisella	0.005926	5	0.001398	86	Methanocaldococcus	Nitrosopumilus	0.005508	1
0.005212	3	Acidipropionibacterium	0.005828	2	Methylocella	0.004744	4	Succinispira	0.005337	5	Dorea	0.006021	6	Indibacter	0.004538	2	Ehrlichia	0.004849	2	Saprospira	0.006009	2	Spirillospora	0.003617	1	Xanthobacter	0.005926	5	0.001398	86	Clostridioides	Paucisalibacillus	0.005508	1
0.005212	3	Candidatus Vecturithrix	0.005828	2	Thermacetogenium	0.004744	4	Budvicia	0.005337	5	Collimonas	0.006021	6	Chelonobacter	0.004538	2	Wolbachia	0.004849	2	Sporocytophaga	0.006009	2	Sagittula	0.003617	1	Azotobacter	0.005926	5	0.001381	85	Helcococcus	Niastella	0.005508	1
0.003474	2	Methylocystis	0.005828	2	Bacteriovorax	0.004744	4	Corallococcus	0.005337	5	Sulfurihydrogenibium	0.006021	6	Limnohabitans	0.004538	2	Saprospira	0.004849	2	Afipia	0.006009	2	Nevskia	0.003617	1	Methylococcus	0.005926	5	0.001381	85	Gracilibacillus	Castellaniella	0.005508	1
0.003474	2	Francisella	0.005828	2	Thermosynechococcus	0.004744	4	Bosea	0.005337	5	Faecalibacterium	0.006021	6	Salinarimonas	0.004538	2	Beggiatoa	0.004849	2	Rhodospirillum	0.006009	2	Desulfonatronum	0.003617	1	Thermomicrobium	0.005926	5	0.001381	85	Collinsella	Nonlabens	0.005508	1
0.003474	2	Thermomicrobium	0.005828	2	Roseibium	0.004744	4	Oligella	0.005337	5	Mastigocladopsis	0.006021	6	Hoyosella	0.004538	2	Erythrobacter	0.004849	2	Pelodictyon	0.006009	2	Cryobacterium	0.003617	1	Eikenella	0.005926	5	0.001381	85	Luteibacter	Niabella	0.005508	1
0.003474	2	Zymomonas	0.005828	2	Hahella	0.004744	4	Pandoraea	0.005337	5	Anaerolinea	0.006021	6	Jejuia	0.004538	2	Pelodictyon	0.004849	2	Microcystis	0.006009	2	Brenneria	0.003617	1	Citrobacter	0.005926	5	0.001381	85	Thioclava	Actinocatenispora	0.005508	1
0.003474	2	Fibrobacter	0.005828	2	Yokenella	0.004744	4	Roseivivax	0.005337	5	Marvinbryantia	0.006021	6	Caldanaerobius	0.004538	2	Prosthecochloris	0.004849	2	Spirulina	0.006009	2	Roseovarius	0.003617	1	Escherichia	0.005926	5	0.001381	85	Nafulsella	Zunongwangia	0.005508	1
0.003474	2	Wolinella	0.005828	2	Ureibacillus	0.004744	4	Thermicanus	0.005337	5	Pseudoclavibacter	0.006021	6	Gilvimarinus	0.004538	2	Microcystis	0.004849	2	Anabaena	0.006009	2	Gracilibacillus	0.003617	1	Salmonella	0.005926	5	0.001365	84	Herpetosiphon	Alloscardovia	0.005508	1
0.003474	2	Oxalobacter	0.005828	2	Methylosarcina	0.004744	4	Alkalibacterium	0.005337	5	Sulfurovum	0.006021	6	Chthonomonas	0.004538	2	Anabaena	0.004849	2	Trichodesmium	0.006009	2	Ferroplasma	0.003617	1	Edwardsiella	0.005926	5	0.001365	84	Serinicoccus	Dethiobacter	0.005508	1
0.003474	2	Desulfomicrobium	0.005828	2	Magnetococcus	0.004744	4	Coprobacillus	0.005337	5	Arsenicicoccus	0.006021	6	Cesiribacter	0.004538	2	Planococcus	0.004849	2	Pediococcus	0.006009	2	Thermocrinis	0.003617	1	Pasteurella	0.005926	5	0.001349	83	Slackia	Mesoflavibacter	0.005508	1
0.003474	2	Nitrosomonas	0.005828	2	Oerskovia	0.004744	4	Desulfotalea	0.005337	5	Nitratiruptor	0.006021	6	Nafulsella	0.004538	2	Renibacterium	0.004849	2	Lactococcus	0.006009	2	Mannheimia	0.003617	1	Fibrobacter	0.005926	5	0.001349	83	Lechevalieria	Reyranella	0.005508	1
0.003474	2	Wolbachia	0.005828	2	Cyanobium	0.004744	4	Muricauda	0.005337	5	Nitratifractor	0.006021	6	Fictibacillus	0.004538	2	Kurthia	0.004849	2	Marinococcus	0.006009	2	Caldivirga	0.003617	1	Oxalobacter	0.005926	5	0.001349	83	Jannaschia	Neptuniibacter	0.005508	1
0.003474	2	Sporocytophaga	0.005828	2	Hydrogenobaculum	0.004744	4	Pectobacterium	0.005337	5	Hoeflea	0.006021	6	Pseudobacteroides	0.004538	2	Saccharopolyspora	0.004849	2	Sporosarcina	0.006009	2	Cylindrospermopsis	0.003617	1	Ruminobacter	0.005926	5	0.001349	83	Advenella	Singulisphaera	0.005508	1
0.003474	2	Beggiatoa	0.005828	2	Thalassospira	0.004744	4	Limnobacter	0.005337	5	Odoribacter	0.006021	6	Mesoaciditoga	0.004538	2	Thermoactinomyces	0.004849	2	Kurthia	0.006009	2	Chitinophaga	0.003617	1	Desulfococcus	0.005926	5	0.001349	83	Schlesneria	Tepidanaerobacter	0.005508	1
0.003474	2	Microcystis	0.005828	2	Shuttleworthia	0.004744	4	Idiomarina	0.005337	5	Sulfuricurvum	0.006021	6	Terrisporobacter	0.004538	2	Aeromicrobium	0.004849	2	Propionibacterium	0.006009	2	Aminomonas	0.003617	1	Nitrosomonas	0.005926	5	0.001333	82	Gemmata	Methanolinea	0.005508	1
0.003474	2	Nitrosococcus	0.005828	2	Opitutus	0.004744	4	Salegentibacter	0.005337	5	Lacinutrix	0.006021	6	Saccharicrinis	0.004538	2	Pimelobacter	0.004849	2	Thermoactinomyces	0.006009	2	Budvicia	0.003617	1	Thiobacillus	0.005926	5	0.001333	82	Leuconostoc	Sediminibacterium	0.005508	1
0.003474	2	Marinococcus	0.005828	2	Arenibacter	0.004744	4	Cedecea	0.005337	5	Cohnella	0.006021	6	Pseudopedobacter	0.004538	2	Thermofilum	0.004849	2	Aeromicrobium	0.006009	2	Hippea	0.003617	1	Sporocytophaga	0.005926	5	0.001333	82	Sagittula	Aliivibrio	0.005508	1
0.003474	2	Sporosarcina	0.005828	2	Salinisphaera	0.004744	4	Vulcanisaeta	0.005337	5	Tuberibacillus	0.006021	6	Pseudooceanicola	0.004538	2	Thermoproteus	0.004849	2	Methanosaeta	0.006009	2	Beutenbergia	0.003617	1	Weeksella	0.005926	5	0.001333	82	Thalassospira	Methylacidiphilum	0.005508	1
0.003474	2	Tropheryma	0.005828	2	Smithella	0.004744	4	Hydrogenobaculum	0.005337	5	Paludibacter	0.006021	6	Gorillibacterium	0.004538	2	Desulfobacter	0.004849	2	Pyrococcus	0.006009	2	Allochromatium	0.003617	1	Beggiatoa	0.005926	5	0.001333	82	Zavarzinella	Parvimonas	0.005508	1
0.003474	2	Aeromicrobium	0.005828	2	Marinithermus	0.004744	4	Halosimplex	0.005337	5	Olivibacter	0.006021	6	Gemmatirosa	0.004538	2	Acetonema	0.004849	2	Thermoproteus	0.006009	2	Marichromatium	0.003617	1	Ectothiorhodospira	0.005926	5	0.001316	81	Microbulbifer	Hellea	0.005508	1
0.003474	2	Tsukamurella	0.005828	2	Caldithrix	0.004744	4	Tistrella	0.005337	5	Terriglobus	0.006021	6	Sediminispirochaeta	0.004538	2	Thermosipho	0.004849	2	Thermoplasma	0.006009	2	Asaia	0.003617	1	Thiocapsa	0.005926	5	0.0013	80	Stigmatella	Ignavibacterium	0.005508	1
0.003474	2	Ureaplasma	0.005828	2	Scardovia	0.004744	4	Shuttleworthia	0.005337	5	Sphaerochaeta	0.006021	6	Acidipropionibacterium	0.004538	2	Teredinibacter	0.004849	2	Methanopyrus	0.006009	2	Pandoraea	0.003617	1	Chlorogloeopsis	0.005926	5	0.0013	80	Syntrophobacter	Celeribacter	0.005508	1
0.003474	2	Haloarcula	0.005828	2	Caldisphaera	0.004744	4	Opitutus	0.005337	5	Aggregatibacter	0.005018	5	Methylophilus	0.004538	2	Heliobacterium	0.004849	2	Methanohalobium	0.006009	2	Thermicanus	0.003617	1	Microcystis	0.005926	5	0.0013	80	Nitrososphaera	Candidatus Zinderia	0.005508	1
0.003474	2	Methanosphaera	0.005828	2	Gemmobacter	0.004744	4	Methylocapsa	0.005337	5	Salsuginibacillus	0.005018	5	Edwardsiella	0.004538	2	Aquifex	0.004849	2	Thermotoga	0.006009	2	Oscillochloris	0.003617	1	Synechocystis	0.005926	5	0.0013	80	Pseudogulbenkiania	Solitalea	0.005508	1
0.003474	2	Methanopyrus	0.005828	2	Desulfonauticus	0.004744	4	Jannaschia	0.005337	5	Dethiobacter	0.005018	5	Fibrobacter	0.004538	2	Brochothrix	0.004849	2	Desulfomonile	0.006009	2	Ignatzschineria	0.003617	1	Spirulina	0.005926	5	0.001284	79	Gemmatimonas	Mobilicoccus	0.005508	1
0.003474	2	Haliscomenobacter	0.005828	2	Micavibrio	0.004744	4	Turicibacter	0.005337	5	Neptuniibacter	0.005018	5	Nitrosomonas	0.004538	2	Acidianus	0.004849	2	Arhodomonas	0.006009	2	Syntrophothermus	0.003617	1	Prochlorothrix	0.005926	5	0.001284	79	Sciscionella	Commensalibacter	0.005508	1
0.003474	2	Arhodomonas	0.005828	2	Faecalibacterium	0.004744	4	Conexibacter	0.005337	5	Segetibacter	0.005018	5	Thiovulum	0.004538	2	Sinorhizobium	0.004849	2	Acetonema	0.006009	2	Geobacillus	0.003617	1	Pediococcus	0.005926	5	0.001284	79	Erysipelatoclostridium	Catelliglobosispora	0.005508	1
0.003474	2	Acetonema	0.005828	2	Chamaesiphon	0.004744	4	Alicycliphilus	0.005337	5	Parvimonas	0.005018	5	Erythrobacter	0.004538	2	Acetohalobium	0.004849	2	Aquifex	0.006009	2	Limnobacter	0.003617	1	Peptostreptococcus	0.005926	5	0.001268	78	Gemella	Catenovulum	0.005508	1
0.003474	2	Thermosipho	0.005828	2	Fulvimarina	0.004744	4	Collimonas	0.005337	5	Hellea	0.005018	5	Rhodospirillum	0.004538	2	Desulfobacula	0.004849	2	Cardiobacterium	0.006009	2	Olsenella	0.003617	1	Aerococcus	0.005926	5	0.001268	78	Tetrasphaera	Mariniradius	0.005508	1
0.003474	2	Fervidobacterium	0.005828	2	Kordia	0.004744	4	Halobiforma	0.005337	5	Haloferula	0.005018	5	Pelodictyon	0.004538	2	Thermodesulfovibrio	0.004849	2	Hirschia	0.006009	2	Thermacetogenium	0.003617	1	Clavibacter	0.005926	5	0.001268	78	Pusillimonas	Fictibacillus	0.005508	1
0.003474	2	Roseobacter	0.005828	2	Thermodesulfobium	0.004744	4	Sulfurihydrogenibium	0.005337	5	Rubidibacter	0.005018	5	Nitrospira	0.004538	2	Buchnera	0.004849	2	Symbiobacterium	0.006009	2	Bacteriovorax	0.003617	1	Erysipelothrix	0.005926	5	0.001268	78	Syntrophorhabdus	Intestinibacter	0.005508	1
0.003474	2	Heliobacterium	0.005828	2	Reinekea	0.004744	4	Fulvimarina	0.005337	5	Robinsoniella	0.005018	5	Erysipelothrix	0.004538	2	Rothia	0.004849	2	Acidianus	0.006009	2	Thermosynechococcus	0.003617	1	Alloiococcus	0.005926	5	0.001251	77	Neptuniibacter	Phaeodactylibacter	0.005508	1
0.003474	2	Acidianus	0.005828	2	Anaerotruncus	0.004744	4	Formosa	0.005337	5	Sciscionella	0.005018	5	Natronobacterium	0.004538	2	Kingella	0.004849	2	Sulfobacillus	0.006009	2	Halorhabdus	0.003617	1	Thermoanaerobacter	0.005926	5	0.001235	76	Syntrophomonas	Caldisalinibacter	0.005508	1
0.003474	2	Sulfobacillus	0.005828	2	Robiginitalea	0.004744	4	Thermodesulfobium	0.005337	5	Schlesneria	0.005018	5	Thermoproteus	0.004538	2	Phascolarctobacterium	0.004849	2	Acidothermus	0.006009	2	Salinibacter	0.003617	1	Actinopolyspora	0.005926	5	0.001235	76	Pseudobutyrivibrio	Thermorudis	0.005508	1
0.003474	2	Acidothermus	0.005828	2	Kangiella	0.004744	4	Reinekea	0.005337	5	Methanomassiliicoccus	0.005018	5	Desulfobacterium	0.004538	2	Acetobacterium	0.004849	2	Lachnospira	0.006009	2	Hahella	0.003617	1	Thermoactinomyces	0.005926	5	0.001235	76	Mesonia	Actinotignum	0.005508	1
0.003474	2	Sinorhizobium	0.005828	2	Thermobaculum	0.004744	4	Caldilinea	0.005337	5	Hamadaea	0.005018	5	Thermotoga	0.004538	2	Rhodovulum	0.004849	2	Rubrivivax	0.006009	2	Ureibacillus	0.003617	1	Pimelobacter	0.005926	5	0.001235	76	Rivularia	Paraclostridium	0.005508	1
0.003474	2	Thermoanaerobacterium	0.005828	2	Blastopirellula	0.004744	4	Candidatus Scalindua	0.005337	5	Arcticibacter	0.005018	5	Flexistipes	0.004538	2	Liberibacter	0.004849	2	Sinorhizobium	0.006009	2	Peptoniphilus	0.003617	1	Tsukamurella	0.005926	5	0.001235	76	Phaeodactylibacter	Candidatus Rubidus	0.005508	1
0.003474	2	Natronococcus	0.005828	2	Serinicoccus	0.004744	4	Thermodesulfatator	0.005337	5	Methyloglobulus	0.005018	5	Roseobacter	0.004538	2	Blattabacterium	0.004849	2	Thermonema	0.006009	2	Anaerococcus	0.003617	1	Methanohalophilus	0.005926	5	0.001219	75	Microscilla	Bernardetia	0.005508	1
0.003474	2	Photorhabdus	0.005828	2	Nitratiruptor	0.004744	4	Hydrocarboniphaga	0.005337	5	Gottschalkia	0.005018	5	Synergistes	0.004538	2	Sphaerotilus	0.004849	2	Ornithobacterium	0.006009	2	Lechevalieria	0.003617	1	Methanocorpusculum	0.004741	4	0.001219	75	Haloarcula	Methylophilus	0.005508	1
0.003474	2	Aminobacter	0.005828	2	Geopsychrobacter	0.004744	4	Methylohalobius	0.005337	5	Phaeodactylibacter	0.005018	5	Rhodoferax	0.004538	2	Streptobacillus	0.004849	2	Arcanobacterium	0.006009	2	Laribacter	0.003617	1	Methanospirillum	0.004741	4	0.001219	75	Candidatus Sulcia	Methylocystis	0.005508	1
0.003474	2	Thiomonas	0.005828	2	Jiangella	0.004744	4	Crocinitomix	0.005337	5	Pseudothermotoga	0.005018	5	Rubrivivax	0.004538	2	Arthrospira	0.004849	2	Rhodothermus	0.006009	2	Citricoccus	0.003617	1	Methanolobus	0.004741	4	0.001219	75	Niastella	Methylobacillus	0.005508	1
0.003474	2	Phascolarctobacterium	0.005828	2	Curvibacter	0.004744	4	Anaerofustis	0.005337	5	Franconibacter	0.005018	5	Phyllobacterium	0.004538	2	Dermabacter	0.004849	2	Leptonema	0.006009	2	Eremococcus	0.003617	1	Archaeoglobus	0.004741	4	0.001219	75	Candidatus Vecturithrix	Zymomonas	0.005508	1
0.003474	2	Rahnella	0.005828	2	Candidatus Protochlamydia	0.004744	4	Rhodopirellula	0.005337	5	Gimesia	0.005018	5	Petrotoga	0.004538	2	Methylophaga	0.004849	2	Candidatus Phytoplasma	0.006009	2	Gemmatimonas	0.003617	1	Thermoproteus	0.004741	4	0.001203	74	Beijerinckia	Pasteurella	0.005508	1
0.003474	2	Nitrococcus	0.005828	2	Alkaliflexus	0.004744	4	Serinicoccus	0.005337	5	Gorillibacterium	0.005018	5	Rhodothermus	0.004538	2	Sutterella	0.004849	2	Acetobacterium	0.006009	2	Ramlibacter	0.003617	1	Methanosphaera	0.004741	4	0.001203	74	Dietzia	Roseburia	0.005508	1
0.003474	2	Nitrospina	0.005828	2	Segniliparus	0.004744	4	Citreicella	0.005337	5	Gemmatirosa	0.005018	5	Thiomonas	0.004538	2	Rubrobacter	0.004849	2	Acidobacterium	0.006009	2	Shuttleworthia	0.003617	1	Methanopyrus	0.004741	4	0.001203	74	Polymorphum	Desulfomicrobium	0.005508	1
0.003474	2	Holophaga	0.005828	2	Kordiimonas	0.004744	4	Chthoniobacter	0.005337	5	Candidatus Nitrosotenuis	0.005018	5	Leptonema	0.004538	2	Caldicellulosiruptor	0.004849	2	Kineococcus	0.006009	2	Proteocatella	0.003617	1	Methanohalobium	0.004741	4	0.001186	73	Zymomonas	Thiobacillus	0.005508	1
0.003474	2	Dermabacter	0.005828	2	Advenella	0.004744	4	Algicola	0.004269	4	Methylocystis	0.005018	5	Kingella	0.004538	2	Geothrix	0.004849	2	Rhodovulum	0.006009	2	Smithella	0.003617	1	Flexistipes	0.004741	4	0.001186	73	Leeuwenhoekiella	Beggiatoa	0.005508	1
0.003474	2	Dietzia	0.005828	2	Martelella	0.004744	4	Emticicia	0.004269	4	Alcaligenes	0.005018	5	Halothermothrix	0.004538	2	Leucothrix	0.004849	2	Nitrococcus	0.006009	2	Persephonella	0.003617	1	Arhodomonas	0.004741	4	0.001186	73	Thalassobaculum	Porphyrobacter	0.005508	1
0.003474	2	Thermocrispum	0.005828	2	Rubellimicrobium	0.004744	4	Pontibacter	0.004269	4	Salmonella	0.005018	5	Nitrococcus	0.004538	2	Oenococcus	0.004849	2	Nitrospina	0.006009	2	Xylanimonas	0.003617	1	Sporomusa	0.004741	4	0.001186	73	Komagataeibacter	Spirulina	0.005508	1
0.003474	2	Blastococcus	0.005828	2	Algicola	0.004744	4	Goodfellowiella	0.004269	4	Rickettsia	0.005018	5	Acetivibrio	0.004538	2	Agrococcus	0.004849	2	Arthrospira	0.006009	2	Caldithrix	0.003617	1	Heliobacterium	0.004741	4	0.001186	73	Desulfatiglans	Nitrosococcus	0.005508	1
0.003474	2	Actinokineospora	0.005828	2	Elizabethkingia	0.004744	4	Pelosinus	0.004269	4	Ruminobacter	0.005018	5	Holophaga	0.004538	2	Orenia	0.004849	2	Dietzia	0.006009	2	Conexibacter	0.003617	1	Symbiobacterium	0.004741	4	0.00117	72	Pirellula	Peptostreptococcus	0.005508	1
0.003474	2	Candidatus Magnetobacterium	0.005828	2	Dokdonia	0.004744	4	Natranaerobius	0.004269	4	Desulfomicrobium	0.005018	5	Blastococcus	0.004538	2	Gelidibacter	0.004849	2	Candidatus Microthrix	0.006009	2	Tannerella	0.003617	1	Brochothrix	0.004741	4	0.00117	72	Pelodictyon	Lactococcus	0.005508	1
0.003474	2	Sutterella	0.005828	2	Cohnella	0.004744	4	Uliginosibacterium	0.004269	4	Thiovulum	0.005018	5	Candidatus Magnetobacterium	0.004538	2	Acetomicrobium	0.004849	2	Halobacteroides	0.006009	2	Terasakiella	0.003617	1	Acidovorax	0.004741	4	0.00117	72	Moritella	Gemella	0.005508	1
0.003474	2	Lawsonia	0.005828	2	Ignisphaera	0.004744	4	Methanoregula	0.004269	4	Rhodobacter	0.005018	5	Metallosphaera	0.004538	2	Xenococcus	0.004849	2	Tolumonas	0.006009	2	Scardovia	0.003617	1	Anaerobiospirillum	0.004741	4	0.00117	72	Alkalilimnicola	Erysipelothrix	0.005508	1
0.003474	2	Metallosphaera	0.005828	2	Goodfellowiella	0.004744	4	Andreprevotia	0.004269	4	Peptostreptococcus	0.005018	5	Rubrobacter	0.004538	2	Desulfocapsa	0.004849	2	Polynucleobacter	0.006009	2	Halomicrobium	0.003617	1	Lachnospira	0.004741	4	0.001154	71	Runella	Propionibacterium	0.005508	1
0.003474	2	Halobacteroides	0.005828	2	Olleya	0.004744	4	Barnesiella	0.004269	4	Atopobium	0.005018	5	Halobacteroides	0.004538	2	Janibacter	0.004849	2	Moorella	0.006009	2	Halobiforma	0.003617	1	Rubrivivax	0.004741	4	0.001154	71	Cytophaga	Geodermatophilus	0.005508	1
0.003474	2	Promicromonospora	0.005828	2	Criblamydia	0.004744	4	Solimonas	0.004269	4	Geodermatophilus	0.005018	5	Johnsonella	0.004538	2	Acidimicrobium	0.004849	2	Leucothrix	0.006009	2	Candidatus Blochmannia	0.003617	1	Lyngbya	0.004741	4	0.001154	71	Aeromicrobium	Desulfurococcus	0.005508	1
0.003474	2	Tolumonas	0.005828	2	Paludibacter	0.004744	4	Catenulispora	0.004269	4	Thermoactinomyces	0.005018	5	Catonella	0.004538	2	Hyperthermus	0.004849	2	Pseudobutyrivibrio	0.006009	2	Parvularcula	0.003617	1	Sinorhizobium	0.004741	4	0.001154	71	Tsukamurella	Staphylothermus	0.005508	1
0.003474	2	Johnsonella	0.005828	2	Sedimenticola	0.004744	4	Desulfurivibrio	0.004269	4	Methanosaeta	0.005018	5	Salinicoccus	0.004538	2	Thiorhodococcus	0.004849	2	Oenococcus	0.006009	2	Kineosphaera	0.003617	1	Desulfobacula	0.004741	4	0.001154	71	Leisingera	Desulfobacterium	0.005508	1
0.003474	2	Ferrimonas	0.005828	2	Methylotenera	0.004744	4	Desulfarculus	0.004269	4	Thermofilum	0.005018	5	Oenococcus	0.004538	2	Kocuria	0.004849	2	Picrophilus	0.006009	2	Sulfurihydrogenibium	0.003617	1	Ornithobacterium	0.004741	4	0.001154	71	Woodsholea	Thermoplasma	0.005508	1
0.003474	2	Caloramator	0.005828	2	Rubritalea	0.004744	4	Kiloniella	0.004269	4	Thermoplasma	0.005018	5	Myxosarcina	0.004538	2	Spirillospora	0.004849	2	Kineosporia	0.006009	2	Fulvimarina	0.003617	1	Thermodesulfovibrio	0.004741	4	0.001154	71	Nitrincola	Thermosipho	0.005508	1
0.003474	2	Pseudobutyrivibrio	0.005828	2	Patulibacter	0.004744	4	Balneola	0.004269	4	Methanohalobium	0.005018	5	Intrasporangium	0.004538	2	Bergeyella	0.004849	2	Psychroserpens	0.006009	2	Saccharibacter	0.003617	1	Caedibacter	0.004741	4	0.001154	71	Diplosphaera	Hirschia	0.005508	1
0.003474	2	Orenia	0.005828	2	Verminephrobacter	0.004744	4	Segetibacter	0.004269	4	Arhodomonas	0.005018	5	Lamprocystis	0.004538	2	Sulfitobacter	0.004849	2	Acetomicrobium	0.006009	2	Dyella	0.003617	1	Alicyclobacillus	0.004741	4	0.001154	71	Gimesia	Symbiobacterium	0.005508	1
0.003474	2	Intrasporangium	0.005828	2	Granulibacter	0.004744	4	Hellea	0.004269	4	Acetonema	0.005018	5	Planktothrix	0.004538	2	Sanguibacter	0.004849	2	Janibacter	0.006009	2	Belliella	0.003617	1	Amphibacillus	0.004741	4	0.001138	70	Fibrisoma	Rubrivivax	0.005508	1
0.003474	2	Lamprocystis	0.005828	2	Pelosinus	0.004744	4	Haloferula	0.004269	4	Aquifex	0.005018	5	Dehalobacter	0.004538	2	Dehalococcoides	0.004849	2	Deferribacter	0.006009	2	Salinibacterium	0.003617	1	Dolosigranulum	0.004741	4	0.001121	69	Gluconobacter	Halothermothrix	0.005508	1
0.003474	2	Deferribacter	0.005828	2	Belnapia	0.004744	4	Psychrilyobacter	0.004269	4	Hirschia	0.005018	5	Rickettsiella	0.004538	2	Demetria	0.004849	2	Octadecabacter	0.006009	2	Woodsholea	0.003617	1	Veillonella	0.004741	4	0.001121	69	Rhodomicrobium	Candidatus Phytoplasma	0.005508	1
0.003474	2	Spirillospora	0.005828	2	Galbibacter	0.004744	4	Indibacter	0.004269	4	Acidothermus	0.005018	5	Thiorhodovibrio	0.004538	2	Desulfurobacterium	0.004849	2	Chroococcidiopsis	0.006009	2	Crinalium	0.003617	1	Buchnera	0.004741	4	0.001121	69	Desulfospira	Neorickettsia	0.005508	1
0.003474	2	Halogeometricum	0.005828	2	Echinicola	0.004744	4	Phycisphaera	0.004269	4	Lyngbya	0.005018	5	Citromicrobium	0.004538	2	Marinospirillum	0.004849	2	Aneurinibacillus	0.006009	2	Hydrocarboniphaga	0.003617	1	Rothia	0.004741	4	0.001121	69	Asaia	Liberibacter	0.005508	1
0.003474	2	Sanguibacter	0.005828	2	Actinocatenispora	0.004744	4	Fervidicoccus	0.004269	4	Hydrogenovibrio	0.005018	5	Ferroplasma	0.004538	2	Actinoalloteichus	0.004849	2	Cylindrospermum	0.006009	2	Grimontia	0.003617	1	Kingella	0.004741	4	0.001121	69	Varibaculum	Actinosynnema	0.005508	1
0.003474	2	Dehalococcoides	0.005828	2	Desulfurispirillum	0.004744	4	Bavariicoccus	0.004269	4	Amphibacillus	0.005018	5	Neptunomonas	0.004538	2	Aquamicrobium	0.004849	2	Thiorhodococcus	0.006009	2	Caldanaerobacter	0.003617	1	Kinetoplastibacterium	0.004741	4	0.001121	69	Saccharibacter	Ewingella	0.005508	1
0.003474	2	Thiorhodovibrio	0.005828	2	Caenispirillum	0.004744	4	Ignavibacterium	0.004269	4	Helcococcus	0.005018	5	Thermocrinis	0.004538	2	Dechloromonas	0.004849	2	Nesterenkonia	0.006009	2	Oceanicola	0.003617	1	Candidatus Phytoplasma	0.004741	4	0.001121	69	Hylemonella	Syntrophus	0.005508	1
0.003474	2	Methylopila	0.005828	2	Aureimonas	0.004744	4	Fibrisoma	0.004269	4	Acetobacterium	0.005018	5	Succinispira	0.004538	2	Ferroplasma	0.004849	2	Kytococcus	0.006009	2	Anaerofustis	0.003617	1	Acetobacterium	0.004741	4	0.001121	69	Maribacter	Caloramator	0.005508	1
0.003474	2	Natronomonas	0.005828	2	Aggregatibacter	0.004744	4	Celeribacter	0.004269	4	Liberibacter	0.005018	5	Methylovorus	0.004538	2	Neptunomonas	0.004849	2	Sagittula	0.006009	2	Blastopirellula	0.003617	1	Acidobacterium	0.004741	4	0.001121	69	Truepera	Salinicoccus	0.005508	1
0.003474	2	Nevskia	0.005828	2	Mesoflavibacter	0.004744	4	Aliagarivorans	0.004269	4	Arthrospira	0.005018	5	Rhodovibrio	0.004538	2	Mycetocola	0.004849	2	Bergeyella	0.006009	2	Sulfurovum	0.003617	1	Neorickettsia	0.004741	4	0.001121	69	Terriglobus	Intrasporangium	0.005508	1
0.003474	2	Terracoccus	0.005828	2	Eudoraea	0.004744	4	Candidatus Zinderia	0.004269	4	Bilophila	0.005018	5	Natrinema	0.004538	2	Succinispira	0.004849	2	Halogeometricum	0.006009	2	Nitrincola	0.003617	1	Rhodovulum	0.004741	4	0.001105	68	Curtobacterium	Nakamurella	0.005508	1
0.003474	2	Dechloromonas	0.005828	2	Joostella	0.004744	4	Solitalea	0.004269	4	Dietzia	0.005018	5	Thermicanus	0.004538	2	Delftia	0.004849	2	Desulfobacca	0.006009	2	Candidatus Cardinium	0.003617	1	Cycloclasticus	0.004741	4	0.001105	68	Kytococcus	Ignicoccus	0.005508	1
0.003474	2	Ferroplasma	0.005828	2	Neptuniibacter	0.004744	4	Gilvimarinus	0.004269	4	Blastococcus	0.005018	5	Coprobacillus	0.004538	2	Corallococcus	0.004849	2	Dehalococcoides	0.006009	2	Candidatus Amoebophilus	0.003617	1	Riemerella	0.004741	4	0.001105	68	Starkeya	Chroococcidiopsis	0.005508	1
0.003474	2	Rhodanobacter	0.005828	2	Oscillibacter	0.004744	4	Chthonomonas	0.004269	4	Actinosynnema	0.005018	5	Collinsella	0.004538	2	Luteimonas	0.004849	2	Demetria	0.006009	2	Curvibacter	0.003617	1	Sphaerotilus	0.004741	4	0.001105	68	Candidatus Scalindua	Dermacoccus	0.005508	1
0.003474	2	Delftia	0.005828	2	Labrenzia	0.004744	4	Commensalibacter	0.004269	4	Johnsonella	0.005018	5	Alishewanella	0.004538	2	Slackia	0.004849	2	Desulfurobacterium	0.006009	2	Odoribacter	0.003617	1	Dactylosporangium	0.004741	4	0.001089	67	Cyanobacterium	Desulfobacca	0.005508	1
0.003474	2	Buttiauxella	0.005828	2	Methanolinea	0.004744	4	Lonsdalea	0.004269	4	Holospora	0.005018	5	Tolypothrix	0.004538	2	Marichromatium	0.004849	2	Marinospirillum	0.006009	2	Segniliparus	0.003617	1	Nitrococcus	0.004741	4	0.001089	67	Pleomorphomonas	Nevskia	0.005508	1
0.003474	2	Leminorella	0.005828	2	Sediminibacterium	0.004744	4	Nodosilinea	0.004269	4	Picrophilus	0.005018	5	Zobellia	0.004538	2	Bosea	0.004849	2	Citromicrobium	0.006009	2	Acaricomes	0.003617	1	Acetivibrio	0.004741	4	0.001089	67	Austwickia	Desulfurobacterium	0.005508	1
0.003474	2	Tatumella	0.005828	2	Methylacidiphilum	0.004744	4	Diplosphaera	0.004269	4	Polaromonas	0.005018	5	Pectobacterium	0.004538	2	Gluconacetobacter	0.004849	2	Thermaerobacter	0.006009	2	Subdoligranulum	0.003617	1	Dermabacter	0.004741	4	0.001073	66	Ruminobacter	Aquamicrobium	0.005508	1
0.003474	2	Psychroflexus	0.005828	2	Clostridiisalibacter	0.004744	4	Eggerthia	0.004269	4	Intrasporangium	0.005018	5	Magnetococcus	0.004538	2	Oligella	0.004849	2	Rhodanobacter	0.006009	2	Gramella	0.003617	1	Blastococcus	0.004741	4	0.001073	66	Phyllobacterium	Roseovarius	0.005508	1
0.003474	2	Nonomuraea	0.005828	2	Sharpea	0.004744	4	Niveispirillum	0.004269	4	Thiorhodococcus	0.005018	5	Cetobacterium	0.004538	2	Coprobacillus	0.004849	2	Mycetocola	0.006009	2	Desulfitibacter	0.003617	1	Methylomicrobium	0.004741	4	0.001073	66	Methylophaga	Rhodanobacter	0.005508	1
0.003474	2	Hippea	0.005828	2	Candidatus Regiella	0.004744	4	Caldisalinibacter	0.004269	4	Natronomonas	0.005018	5	Caldithrix	0.004538	2	Collinsella	0.004849	2	Actinobaculum	0.006009	2	Chthoniobacter	0.003617	1	Dialister	0.004741	4	0.001073	66	Nevskia	Actinobaculum	0.005508	1
0.003474	2	Sodalis	0.005828	2	Aliihoeflea	0.004744	4	Pseudothermotoga	0.004269	4	Delftia	0.005018	5	Caldisphaera	0.004538	2	Oscillochloris	0.004849	2	Caldivirga	0.006009	2	Phaeobacter	0.003617	1	Stenotrophomonas	0.004741	4	0.001073	66	Thermaerobacter	Methylovorus	0.005508	1
0.003474	2	Allochromatium	0.005828	2	Ruania	0.004744	4	Gimesia	0.004269	4	Methylovorus	0.005018	5	Desulfatibacillum	0.004538	2	Pelistega	0.004849	2	Cylindrospermopsis	0.006009	2	Methylibium	0.003617	1	Metallosphaera	0.004741	4	0.001073	66	Lentzea	Corallococcus	0.005508	1
0.003474	2	Halorhodospira	0.005828	2	Solibacillus	0.004744	4	Halobacteriovorax	0.004269	4	Buttiauxella	0.005018	5	Anaerolinea	0.004538	2	Ensifer	0.004849	2	Delftia	0.006009	2	Rubritalea	0.003617	1	Rubrobacter	0.004741	4	0.001056	65	Blattabacterium	Marichromatium	0.005508	1
0.003474	2	Phaeospirillum	0.005828	2	Gracilimonas	0.004744	4	Pseudooceanicola	0.004269	4	Thermobifida	0.005018	5	Caldilinea	0.004538	2	Halothiobacillus	0.004849	2	Aminobacterium	0.006009	2	Granulibacter	0.003617	1	Catonella	0.004741	4	0.001056	65	Thermocrinis	Halorhodospira	0.005508	1
0.003474	2	Modestobacter	0.005828	2	Leeia	0.004744	4	Gemmatirosa	0.004269	4	Eggerthella	0.005018	5	Candidatus Scalindua	0.004538	2	Leifsonia	0.004849	2	Methylovorus	0.006009	2	Pelosinus	0.003617	1	Ferrimonas	0.004741	4	0.001056	65	Olsenella	Tenacibaculum	0.005508	1
0.003474	2	Gluconacetobacter	0.005828	2	Candidatus Koribacter	0.004744	4	Lunatimonas	0.004269	4	Thermicanus	0.005018	5	Mucispirillum	0.004538	2	Alishewanella	0.004849	2	Budvicia	0.006009	2	Haladaptatus	0.003617	1	Filifactor	0.004741	4	0.001056	65	Tistrella	Desulfotalea	0.005508	1
0.003474	2	Asaia	0.005828	2	Chelonobacter	0.004744	4	Xanthomarina	0.004269	4	Alkalibacterium	0.005018	5	Aestuariibacter	0.004538	2	Ignatzschineria	0.004849	2	Succinivibrio	0.006009	2	Phycicoccus	0.003617	1	Salinicoccus	0.004741	4	0.001056	65	Caldilinea	Leifsonia	0.005508	1
0.003474	2	Pandoraea	0.005828	2	Limnohabitans	0.004744	4	Bernardetia	0.004269	4	Methanomethylovorans	0.005018	5	Parvibaculum	0.004538	2	Actinopolymorpha	0.004849	2	Slackia	0.006009	2	Methyloversatilis	0.003617	1	Oenococcus	0.004741	4	0.001056	65	Methanocella	Tolypothrix	0.005508	1
0.003474	2	Roseivivax	0.005828	2	Ilumatobacter	0.003558	3	Azorhizobium	0.004269	4	Acidilobus	0.005018	5	Kangiella	0.004538	2	Granulicatella	0.004849	2	Eggerthella	0.006009	2	Sediminibacter	0.003617	1	Picrophilus	0.004741	4	0.001056	65	Aliihoeflea	Methylocella	0.005508	1
0.003474	2	Tenacibaculum	0.005828	2	Hoyosella	0.003558	3	Azotobacter	0.004269	4	Leifsonia	0.005018	5	Blastopirellula	0.004538	2	Olsenella	0.004849	2	Beutenbergia	0.006009	2	Niabella	0.003617	1	Dethiosulfovibrio	0.004741	4	0.001056	65	Lutibaculum	Haloterrigena	0.005508	1
0.003474	2	Acidilobus	0.005828	2	Caldicoprobacter	0.003558	3	Klebsiella	0.004269	4	Carboxydothermus	0.005018	5	Owenweeksia	0.004538	2	Prauserella	0.004849	2	Marichromatium	0.006009	2	Aestuariimicrobium	0.003617	1	Hydrogenophaga	0.004741	4	0.001056	65	Peptoanaerobacter	Ornithinimicrobium	0.005508	1
0.003474	2	Anaerovorax	0.005828	2	Solitalea	0.003558	3	Coxiella	0.004269	4	Alkalilimnicola	0.005018	5	Citreicella	0.004538	2	Salegentibacter	0.004849	2	Halorhodospira	0.006009	2	Fulvivirga	0.003617	1	Candidatus Arthromitus	0.004741	4	0.00104	64	Pimelobacter	Thermosynechococcus	0.005508	1
0.003474	2	Alishewanella	0.005828	2	Gilvimarinus	0.003558	3	Ruminobacter	0.004269	4	Thermosynechococcus	0.005018	5	Stackebrandtia	0.004538	2	Thermosynechococcus	0.004849	2	Glaciecola	0.006009	2	Aggregatibacter	0.003617	1	Kineosporia	0.004741	4	0.00104	64	Verrucosispora	Ahrensia	0.005508	1
0.003474	2	Muricauda	0.005828	2	Candidatus Nitrosoarchaeum	0.003558	3	Thiovulum	0.004269	4	Halorhabdus	0.005018	5	Sulfuricurvum	0.004538	2	Azospira	0.004849	2	Thioalkalimicrobium	0.006009	2	Desulfovirgula	0.003617	1	Gelidibacter	0.004741	4	0.00104	64	Dysgonomonas	Cedecea	0.005508	1
0.003474	2	Ferrimicrobium	0.005828	2	Pseudoflavonifractor	0.003558	3	Ectothiorhodospira	0.004269	4	Azospira	0.005018	5	Alkaliflexus	0.004538	2	Roseibium	0.004849	2	Pandoraea	0.006009	2	Desulfurivibrio	0.003617	1	Acidocella	0.004741	4	0.00104	64	Pelosinus	Megamonas	0.005508	1
0.003474	2	Halonatronum	0.005828	2	Lonsdalea	0.003558	3	Pelodictyon	0.004269	4	Ahrensia	0.005018	5	Lacinutrix	0.004538	2	Starkeya	0.004849	2	Richelia	0.006009	2	Coraliomargarita	0.003617	1	Salinivibrio	0.004741	4	0.00104	64	Sphaerochaeta	Ilyobacter	0.005508	1
0.003474	2	Anaeroarcus	0.005828	2	Melioribacter	0.003558	3	Spirulina	0.004269	4	Oceanicaulis	0.005018	5	Silanimonas	0.004538	2	Aequorivita	0.004849	2	Oscillochloris	0.006009	2	Mesoflavibacter	0.003617	1	Tetragenococcus	0.004741	4	0.00104	64	Fimbriimonas	Hydrogenobaculum	0.005508	1
0.003474	2	Xenophilus	0.005828	2	Allokutzneria	0.003558	3	Nitrospira	0.004269	4	Gallibacterium	0.005018	5	Goodfellowiella	0.004538	2	Dysgonomonas	0.004849	2	Halothiobacillus	0.006009	2	Reyranella	0.003617	1	Polaromonas	0.004741	4	0.00104	64	Rodentibacter	Opitutus	0.005508	1
0.003474	2	Anaeroglobus	0.005828	2	Lachnoanaerobaculum	0.003558	3	Pediococcus	0.004269	4	Cellulosimicrobium	0.005018	5	Meganema	0.004538	2	Hahella	0.004849	2	Tolypothrix	0.006009	2	Simiduia	0.003617	1	Nakamurella	0.004741	4	0.001024	63	Rhodothermus	Rubritepida	0.005508	1
0.003474	2	Dysgonomonas	0.005828	2	Candidatus Methylomirabilis	0.003558	3	Planococcus	0.004269	4	Ureibacillus	0.005018	5	Castellaniella	0.004538	2	Nodularia	0.004849	2	Ignatzschineria	0.006009	2	Henriciella	0.003617	1	Octadecabacter	0.004741	4	0.001024	63	Coprobacillus	Methylocapsa	0.005508	1
0.003474	2	Magnetococcus	0.005828	2	Catenovulum	0.003558	3	Aeromicrobium	0.004269	4	Shuttleworthia	0.005018	5	Granulibacter	0.004538	2	Methylosarcina	0.004849	2	Pseudoramibacter	0.006009	2	Kiloniella	0.003617	1	Pyrolobus	0.004741	4	0.001024	63	Oceanicaulis	Terasakiella	0.005508	1
0.003474	2	Lentzea	0.005828	2	Algiphilus	0.003558	3	Pimelobacter	0.004269	4	Aurantimonas	0.005018	5	Olivibacter	0.004538	2	Magnetococcus	0.004849	2	Desulfotignum	0.006009	2	Balneola	0.003617	1	Dehalobacter	0.004741	4	0.001024	63	Proteocatella	Scardovia	0.005508	1
0.003474	2	Sphingopyxis	0.005828	2	Fictibacillus	0.003558	3	Sphaerobacter	0.004269	4	Persephonella	0.005018	5	Sediminibacter	0.004538	2	Oerskovia	0.004849	2	Actinopolymorpha	0.006009	2	Candidatus Cloacimonas	0.003617	1	Aeropyrum	0.004741	4	0.001024	63	Allofustis	Sulfurimonas	0.005508	1
0.003474	2	Lechevalieria	0.005828	2	Anaerosalibacter	0.003558	3	Tsukamurella	0.004269	4	Turicibacter	0.005018	5	Halopiger	0.004538	2	Lentzea	0.004849	2	Roseiflexus	0.006009	2	Elioraea	0.003617	1	Kocuria	0.004741	4	0.001024	63	Oceanithermus	Gemmobacter	0.005508	1
0.003474	2	Cyanobium	0.005828	2	Candidatus Methanoperedens	0.003558	3	Methanocorpusculum	0.004269	4	Alicycliphilus	0.005018	5	Terriglobus	0.004538	2	Caloranaerobacter	0.004849	2	Limnobacter	0.006009	2	Neptuniibacter	0.003617	1	Kytococcus	0.004741	4	0.001024	63	Candidatus Latescibacter	Anaerostipes	0.005508	1
0.003474	2	Kribbella	0.005828	2	Candidatus Atelocyanobacterium	0.003558	3	Methanosaeta	0.004269	4	Desulfonauticus	0.005018	5	Congregibacter	0.004538	2	Tistrella	0.004849	2	Olsenella	0.006009	2	Segetibacter	0.003617	1	Moritella	0.004741	4	0.001024	63	Candidatus Phaeomarinobacter	Desulfatibacillum	0.005508	1
0.003474	2	Xylanimonas	0.005828	2	Candidatus Stoquefichus	0.003558	3	Natronobacterium	0.004269	4	Anaerostipes	0.005018	5	Aggregatibacter	0.004538	2	Thermovibrio	0.004849	2	Prauserella	0.006009	2	Methanosphaerula	0.003617	1	Empedobacter	0.004741	4	0.001024	63	Hungatella	Mastigocladopsis	0.005508	1
0.003474	2	Caldithrix	0.005828	2	Draconibacterium	0.003558	3	Thermoproteus	0.004269	4	Chamaesiphon	0.005018	5	Alloscardovia	0.004538	2	Ramlibacter	0.004849	2	Thermosynechococcus	0.006009	2	Methylacidiphilum	0.003617	1	Marinilabilia	0.004741	4	0.001008	62	Demetria	Formosa	0.005508	1
0.003474	2	Scardovia	0.005828	2	Kamptonema	0.003558	3	Sporomusa	0.004269	4	Saccharibacter	0.005018	5	Dethiobacter	0.004538	2	Rubritepida	0.004849	2	Salinibacter	0.006009	2	Thalassobaculum	0.003617	1	Sulfitobacter	0.004741	4	0.001008	62	Citromicrobium	Candidatus Scalindua	0.005508	1
0.003474	2	Gemmobacter	0.005828	2	Gottschalkia	0.003558	3	Dactylococcopsis	0.004269	4	Hylemonella	0.005018	5	Singulisphaera	0.004538	2	Xylanimonas	0.004849	2	Xenophilus	0.006009	2	Sciscionella	0.003617	1	Sanguibacter	0.004741	4	0.001008	62	Pseudaminobacter	Anaerotruncus	0.005508	1
0.003474	2	Sulfurihydrogenibium	0.005828	2	Sedimentitalea	0.003558	3	Acidothermus	0.004269	4	Caldilinea	0.005018	5	Sediminibacterium	0.004538	2	Dorea	0.004849	2	Ahrensia	0.006009	2	Bermanella	0.003617	1	Holdemania	0.004741	4	0.001008	62	Elizabethkingia	Grimontia	0.005508	1
0.003474	2	Micavibrio	0.005828	2	Phaeodactylibacter	0.003558	3	Lachnospira	0.004269	4	Candidatus Scalindua	0.005018	5	Parvimonas	0.004538	2	Turicibacter	0.004849	2	Kozakia	0.006009	2	Indibacter	0.003617	1	Thiorhodovibrio	0.004741	4	0.001008	62	Salinarimonas	Mahella	0.005508	1
0.003474	2	Faecalibacterium	0.005828	2	Pseudothermotoga	0.003558	3	Acetohalobium	0.004269	4	Parvibaculum	0.005018	5	Hellea	0.004538	2	Halomicrobium	0.004849	2	Acaryochloris	0.006009	2	Solibacillus	0.003617	1	Natronomonas	0.004741	4	0.001008	62	Pseudooceanicola	Parvibaculum	0.005508	1
0.003474	2	Desulfatibacillum	0.005828	2	Gimesia	0.003558	3	Thermonema	0.004269	4	Serinicoccus	0.005018	5	Rubidibacter	0.004538	2	Cobetia	0.004849	2	Hahella	0.006009	2	Gracilimonas	0.003617	1	Marinospirillum	0.004741	4	0.000991	61	Sporocytophaga	Lentisphaera	0.005508	1
0.003474	2	Formosa	0.005828	2	Rubinisphaera	0.003558	3	Brachymonas	0.004269	4	Curvibacter	0.005018	5	Gracilimonas	0.004538	2	Desulfonauticus	0.004849	2	Ureibacillus	0.006009	2	Chelonobacter	0.003617	1	Facklamia	0.004741	4	0.000991	61	Herbidospora	Pleomorphomonas	0.005508	1
0.003474	2	Jeotgalicoccus	0.005828	2	Actinotignum	0.003558	3	Thermoanaerobacterium	0.004269	4	Citreicella	0.005018	5	Geminocystis	0.004538	2	Parvularcula	0.004849	2	Methylosarcina	0.006009	2	Ilumatobacter	0.003617	1	Aquamicrobium	0.004741	4	0.000991	61	Rothia	Kangiella	0.005508	1
0.003474	2	Reinekea	0.005828	2	Pseudooceanicola	0.003558	3	Caedibacter	0.004269	4	Silanimonas	0.005018	5	Cellulosilyticum	0.004538	2	Oceanithermus	0.004849	2	Magnetococcus	0.006009	2	Bavariicoccus	0.003617	1	Orientia	0.004741	4	0.000991	61	Adhaeribacter	Nitratifractor	0.005508	1
0.003474	2	Saccharospirillum	0.005828	2	Levyella	0.003558	3	Amphibacillus	0.004269	4	Rubellimicrobium	0.005018	5	Fibrisoma	0.004538	2	Sulfurihydrogenibium	0.004849	2	Oerskovia	0.006009	2	Caldicoprobacter	0.003617	1	Frateuria	0.004741	4	0.000975	60	Psychroserpens	Odoribacter	0.005508	1
0.003474	2	Anaerolinea	0.005828	2	Glutamicibacter	0.003558	3	Syntrophobacter	0.004269	4	Prolixibacter	0.005018	5	Solitalea	0.004538	2	Faecalibacterium	0.004849	2	Lechevalieria	0.006009	2	Fibrisoma	0.003617	1	Citromicrobium	0.004741	4	0.000975	60	Duganella	Aminiphilus	0.005508	1
0.003474	2	Candidatus Portiera	0.005828	2	Vermiphilus	0.003558	3	Sebaldella	0.004269	4	Saccharophagus	0.005018	5	Fimbriimonas	0.004538	2	Desulfatibacillum	0.004849	2	Eremococcus	0.006009	2	Bhargavaea	0.003617	1	Mannheimia	0.004741	4	0.000975	60	Myroides	Silanimonas	0.005508	1
0.003474	2	Candidatus Scalindua	0.005828	2	Candidatus Izimaplasma	0.003558	3	Halothermothrix	0.004269	4	Ignisphaera	0.005018	5	Lonsdalea	0.004538	2	Saccharibacter	0.004849	2	Allobaculum	0.006009	2	Flavonifractor	0.003617	1	Halothece	0.004741	4	0.000975	60	Salegentibacter	Martelella	0.005508	1
0.003474	2	Hydrocarboniphaga	0.005828	2	Rodentibacter	0.003558	3	Desulfurella	0.004269	4	Goodfellowiella	0.005018	5	Catelliglobosispora	0.004538	2	Luteibacter	0.004849	2	Shuttleworthia	0.006009	2	Polymorphum	0.003617	1	Myroides	0.004741	4	0.000975	60	Anoxybacillus	Desulfitibacter	0.005508	1
0.003474	2	Caldanaerobacter	0.002914	1	Dictyoglomus	0.003558	3	Phascolarctobacterium	0.004269	4	Candidatus Sulcia	0.005018	5	Diplosphaera	0.004538	2	Hydrocarboniphaga	0.004849	2	Enterovibrio	0.006009	2	Fimbriimonas	0.003617	1	Caldivirga	0.004741	4	0.000975	60	Formosa	Proteiniphilum	0.005508	1
0.003474	2	Isoptericola	0.002914	1	Stigmatella	0.003558	3	Rahnella	0.004269	4	Salimicrobium	0.005018	5	Catenovulum	0.004538	2	Aestuariibacter	0.004849	2	Geoglobus	0.006009	2	Pseudoflavonifractor	0.003617	1	Chitinophaga	0.004741	4	0.000975	60	Sulfuricurvum	Saccharophagus	0.005508	1
0.003474	2	Parvibaculum	0.002914	1	Cystobacter	0.003558	3	Nitrococcus	0.004269	4	Meganema	0.005018	5	Noviherbaspirillum	0.004538	2	Isoptericola	0.004849	2	Leisingera	0.006009	2	Halolamina	0.003617	1	Delftia	0.004741	4	0.000975	60	Sandarakinorhabdus	Dokdonia	0.005508	1
0.003474	2	Gulosibacter	0.002914	1	Simonsiella	0.003558	3	Acetivibrio	0.004269	4	Castellaniella	0.005018	5	Erysipelatoclostridium	0.004538	2	Lentisphaera	0.004849	2	Turicibacter	0.006009	2	Lonsdalea	0.003617	1	Methanofollis	0.004741	4	0.000975	60	Fibrella	Olleya	0.005508	1
0.003474	2	Thermosinus	0.002914	1	Leptothrix	0.003558	3	Dietzia	0.004269	4	Nonlabens	0.005018	5	Paraglaciecola	0.004538	2	Pleomorphomonas	0.004849	2	Pelotomaculum	0.006009	2	Catelliglobosispora	0.003617	1	Methylovorus	0.004741	4	0.000975	60	Pseudoflavonifractor	Methylotenera	0.005508	1
0.003474	2	Pleomorphomonas	0.002914	1	Gemmata	0.003558	3	Blastococcus	0.004269	4	Pelosinus	0.005018	5	Hungatella	0.004538	2	Thermobaculum	0.004849	2	Collimonas	0.006009	2	Deferrisoma	0.003617	1	Anaerovibrio	0.004741	4	0.000959	59	Moraxella	Belnapia	0.005508	1
0.003474	2	Kangiella	0.002914	1	Borrelia	0.003558	3	Sutterella	0.004269	4	Mariprofundus	0.005018	5	Planctopirus	0.004538	2	Blastopirellula	0.004849	2	Anaerostipes	0.006009	2	Allokutzneria	0.003617	1	Budvicia	0.004741	4	0.000959	59	Sporosarcina	Haladaptatus	0.005508	1
0.003474	2	Owenweeksia	0.002914	1	Francisella	0.003558	3	Actinosynnema	0.004269	4	Maribius	0.005018	5	Halobacteriovorax	0.004538	2	Nitratifractor	0.004849	2	Oceanithermus	0.006009	2	Diplosphaera	0.003617	1	Leminorella	0.004741	4	0.000959	59	Thermodesulfovibrio	Halalkalibacillus	0.005508	1
0.003474	2	Stackebrandtia	0.002914	1	Xanthobacter	0.003558	3	Moorella	0.004269	4	Actinocatenispora	0.005018	5	Candidatus Nitrosotenuis	0.004538	2	Candidatus Cardinium	0.004849	2	Faecalibacterium	0.006009	2	Catenovulum	0.003617	1	Psychroflexus	0.004741	4	0.000959	59	Kingella	Methanoregula	0.005508	1
0.003474	2	Thioclava	0.002914	1	Azotobacter	0.003558	3	Salinicoccus	0.004269	4	Andreprevotia	0.005018	5	Pseudorhizobium	0.004538	2	Thermincola	0.004849	2	Fulvimarina	0.006009	2	Mangrovimonas	0.003617	1	Luteimonas	0.004741	4	0.000959	59	Facklamia	Actinomycetospora	0.005508	1
0.003474	2	Winogradskyella	0.002914	1	Methylobacillus	0.003558	3	Geovibrio	0.004269	4	Deefgea	0.004014	4	Methylocystis	0.004538	2	Jiangella	0.004849	2	Kordia	0.006009	2	Gayadomonas	0.003617	1	Nonomuraea	0.004741	4	0.000959	59	Luteimonas	Mucilaginibacter	0.005508	1
0.003474	2	Alkaliflexus	0.002914	1	Methylobacter	0.003558	3	Pseudobutyrivibrio	0.004269	4	Zunongwangia	0.004014	4	Methylobacillus	0.004538	2	Citreicella	0.004849	2	Yaniella	0.006009	2	Arcticibacter	0.003617	1	Succinivibrio	0.004741	4	0.000959	59	Bryobacter	Desulfurivibrio	0.005508	1
0.003474	2	Advenella	0.002914	1	Fluoribacter	0.003558	3	Gelidibacter	0.004269	4	Alloscardovia	0.004014	4	Fluoribacter	0.004538	2	Bizionia	0.004849	2	Thermodesulfobium	0.006009	2	Schleiferia	0.003617	1	Verrucosispora	0.004741	4	0.000943	58	Klebsiella	Eudoraea	0.005508	1
0.003474	2	Martelella	0.002914	1	Acidiphilium	0.003558	3	Syntrophobotulus	0.004269	4	Coraliomargarita	0.004014	4	Acidiphilium	0.004538	2	Alkaliflexus	0.004849	2	Reinekea	0.006009	2	Youngiibacter	0.003617	1	Candidatus Odyssella	0.004741	4	0.000943	58	Halothiobacillus	Chelativorans	0.005508	1
0.003474	2	Desulfitibacter	0.002914	1	Zymomonas	0.003558	3	Xenococcus	0.004269	4	Haloplasma	0.004014	4	Eikenella	0.004538	2	Salinimonas	0.004849	2	Saccharibacter	0.006009	2	Candidatus Microgenomatus	0.003617	1	Beutenbergia	0.004741	4	0.000943	58	Oceanicola	Desulfarculus	0.005508	1
0.003474	2	Rubellimicrobium	0.002914	1	Morganella	0.003558	3	Intrasporangium	0.004269	4	Salinimicrobium	0.004014	4	Salmonella	0.004538	2	Pontibacillus	0.004849	2	Candidatus Portiera	0.006009	2	Komagataeibacter	0.003617	1	Marichromatium	0.004741	4	0.000943	58	Paraprevotella	Oscillibacter	0.005508	1
0.003474	2	Adhaeribacter	0.002914	1	Salmonella	0.003558	3	Janibacter	0.004269	4	Spongiibacter	0.004014	4	Ruminobacter	0.004538	2	Adhaeribacter	0.004849	2	Candidatus Scalindua	0.006009	2	Paenirhodobacter	0.003617	1	Halorhodospira	0.004741	4	0.000943	58	Gilvimarinus	Geminicoccus	0.005508	1
0.003474	2	Catellicoccus	0.002914	1	Coxiella	0.003558	3	Octadecabacter	0.004269	4	Indibacter	0.004014	4	Hydrogenobacter	0.004538	2	Elizabethkingia	0.004849	2	Thermodesulfatator	0.006009	2	Enorma	0.003617	1	Phaeospirillum	0.004741	4	0.000943	58	Allokutzneria	Butyricicoccus	0.005508	1
0.003474	2	Pusillimonas	0.002914	1	Fibrobacter	0.003558	3	Aneurinibacillus	0.004269	4	Paenisporosarcina	0.004014	4	Ehrlichia	0.004538	2	Prolixibacter	0.004849	2	Oceanicola	0.006009	2	Mesoaciditoga	0.003617	1	Mogibacterium	0.004741	4	0.000943	58	Planctopirus	Rubidibacter	0.005508	1
0.003474	2	Emticicia	0.002914	1	Oxalobacter	0.003558	3	Dehalobacter	0.004269	4	Cellulosilyticum	0.004014	4	Ectothiorhodospira	0.004538	2	Pontibacter	0.004849	2	Robiginitalea	0.006009	2	Tyzzerella	0.003617	1	Oligella	0.004741	4	0.000926	57	Roseburia	Smaragdicoccus	0.005508	1
0.003474	2	Sideroxydans	0.002914	1	Syntrophomonas	0.003558	3	Kocuria	0.004269	4	Aliagarivorans	0.004014	4	Rhodobacter	0.004538	2	Cohnella	0.004849	2	Isoptericola	0.006009	2	Holdemanella	0.003617	1	Asaia	0.004741	4	0.000926	57	Syntrophobotulus	Ruania	0.005508	1
0.003474	2	Shinella	0.002914	1	Ruminobacter	0.003558	3	Nesterenkonia	0.004269	4	Bryobacter	0.004014	4	Lactococcus	0.004538	2	Halalkalicoccus	0.004849	2	Parvibaculum	0.006009	2	Gorillibacterium	0.003617	1	Pandoraea	0.004741	4	0.000926	57	Chitinophaga	Limnohabitans	0.005508	1
0.003474	2	Dokdonia	0.002914	1	Acidaminococcus	0.003558	3	Rickettsiella	0.004269	4	Solitalea	0.004014	4	Ureaplasma	0.004538	2	Goodfellowiella	0.004849	2	Lentisphaera	0.006009	2	Paeniglutamicibacter	0.003617	1	Pseudaminobacter	0.004741	4	0.000926	57	Thermobispora	Geminocystis	0.005508	1
0.003474	2	Fluviicola	0.002914	1	Megasphaera	0.003558	3	Borreliella	0.004269	4	Sulfuricella	0.004014	4	Methanolobus	0.004538	2	Candidatus Sulcia	0.004849	2	Pleomorphomonas	0.006009	2	Candidatus Nitrosotenuis	0.003617	1	Tetrasphaera	0.004741	4	0.000926	57	Methylosarcina	Thermogemmatispora	0.005508	1
0.003474	2	Halalkalicoccus	0.002914	1	Nitrobacter	0.003558	3	Terracoccus	0.004269	4	Mobilicoccus	0.004014	4	Staphylothermus	0.004538	2	Sedimenticola	0.004849	2	Thalassobacter	0.006009	2	Paeniclostridium	0.003617	1	Cyanobacterium	0.004741	4	0.000926	57	Sediminimonas	Caldanaerobius	0.005508	1
0.003474	2	Truepera	0.002914	1	Thiobacillus	0.003558	3	Waddlia	0.004269	4	Polymorphum	0.004014	4	Arhodomonas	0.004538	2	Paucisalibacillus	0.004849	2	Lebetimonas	0.006009	2	Candidatus Rubidus	0.003617	1	Oscillochloris	0.004741	4	0.000926	57	Pedosphaera	Bryobacter	0.005508	1
0.003474	2	Conchiformibius	0.002914	1	Thiovulum	0.003558	3	Citromicrobium	0.004269	4	Fimbriimonas	0.004014	4	Xylella	0.004538	2	Simplicispira	0.004849	2	Geopsychrobacter	0.003004	1	Phenylobacterium	0.003617	1	Pelistega	0.004741	4	0.00091	56	Fervidobacterium	Polymorphum	0.005508	1
0.003474	2	Ignisphaera	0.002914	1	Hydrogenobacter	0.003558	3	Thermaerobacter	0.004269	4	Catelliglobosispora	0.004014	4	Aquifex	0.004538	2	Candidatus Jettenia	0.004849	2	Citreicella	0.003004	1	Runella	0.003617	1	Halothiobacillus	0.004741	4	0.00091	56	Desulfobacula	Methanomassiliicoccus	0.005508	1
0.003474	2	Goodfellowiella	0.002914	1	Wolbachia	0.003558	3	Neptunomonas	0.004269	4	Porticoccus	0.004014	4	Acetohalobium	0.004538	2	Rubritalea	0.004849	2	Odoribacter	0.003004	1	Methylobacillus	0.003617	1	Anaerovorax	0.004741	4	0.00091	56	Terracoccus	Lonsdalea	0.005508	1
0.003474	2	Rhodonellum	0.002914	1	Ectothiorhodospira	0.003558	3	Halothece	0.004269	4	Deferrisoma	0.004014	4	Thermonema	0.004538	2	Sandarakinorhabdus	0.004849	2	Stackebrandtia	0.003004	1	Methylomonas	0.003617	1	Muricauda	0.004741	4	0.00091	56	Alishewanella	Melioribacter	0.005508	1
0.003474	2	Tuberibacillus	0.002914	1	Prosthecochloris	0.003558	3	Caldivirga	0.004269	4	Kyrpidia	0.004014	4	Hydrogenovibrio	0.004538	2	Rivularia	0.004849	2	Sulfuricurvum	0.003004	1	Methylobacter	0.003617	1	Pseudoramibacter	0.004741	4	0.00091	56	Methylacidiphilum	Proteiniclasticum	0.005508	1
0.003474	2	Salimicrobium	0.002914	1	Synechocystis	0.003558	3	Aminobacterium	0.004269	4	Diplosphaera	0.004014	4	Amphibacillus	0.004538	2	Halopiger	0.004849	2	Salinimonas	0.003004	1	Fluoribacter	0.003617	1	Desulfotignum	0.004741	4	0.00091	56	Aliagarivorans	Lachnoanaerobaculum	0.005508	1
0.003474	2	Meganema	0.002914	1	Nitrospira	0.003558	3	Beutenbergia	0.004269	4	Candidatus Methylomirabilis	0.004014	4	Helcococcus	0.004538	2	Echinicola	0.004849	2	Lacinutrix	0.003004	1	Thermomicrobium	0.003617	1	Chrysiogenes	0.004741	4	0.00091	56	Pseudodonghicola	Candidatus Methylomirabilis	0.005508	1
0.003474	2	Castellaniella	0.002914	1	Marinococcus	0.003558	3	Allochromatium	0.004269	4	Catenovulum	0.004014	4	Aminobacter	0.004538	2	Actinocatenispora	0.004849	2	Acaricomes	0.003004	1	Alcaligenes	0.003617	1	Methylocella	0.004741	4	0.000894	55	Microcystis	Gilliamella	0.005508	1
0.003474	2	Patulibacter	0.002914	1	Renibacterium	0.003558	3	Phaeospirillum	0.004269	4	Lutibaculum	0.004014	4	Neorickettsia	0.004538	2	Uliginosibacterium	0.004849	2	Rubellimicrobium	0.003004	1	Zymomonas	0.003617	1	Pectobacterium	0.004741	4	0.000894	55	Thiorhodococcus	Candidatus Methanoperedens	0.005508	1
0.003474	2	Sandarakinorhabdus	0.002914	1	Curtobacterium	0.003558	3	Natrinema	0.004269	4	Fervidicella	0.004014	4	Streptobacillus	0.004538	2	Methanoregula	0.004849	2	Algicola	0.003004	1	Anaplasma	0.003617	1	Syntrophothermus	0.004741	4	0.000894	55	Nodularia	Aliiglaciecola	0.005508	1
0.003474	2	Nonlabens	0.002914	1	Sphaerobacter	0.003558	3	Anaerovorax	0.004269	4	Candidatus Microgenomatus	0.004014	4	Arthrospira	0.004538	2	Mucilaginibacter	0.004849	2	Herminiimonas	0.003004	1	Coxiella	0.003617	1	Geobacillus	0.004741	4	0.000894	55	Kaistia	Youngiibacter	0.005508	1
0.003474	2	Haematobacter	0.002914	1	Ureaplasma	0.003558	3	Tolypothrix	0.004269	4	Komagataeibacter	0.004014	4	Dietzia	0.004538	2	Salsuginibacillus	0.004849	2	Elizabethkingia	0.003004	1	Roseburia	0.003617	1	Carboxydothermus	0.004741	4	0.000894	55	Kineosphaera	Candidatus Latescibacter	0.005508	1
0.003474	2	Methyloversatilis	0.002914	1	Methanohalophilus	0.003558	3	Actinopolymorpha	0.004269	4	Thermoanaerobaculum	0.004014	4	Actinosynnema	0.004538	2	Coraliomargarita	0.004849	2	Emticicia	0.003004	1	Ruminobacter	0.003617	1	Alkalilimnicola	0.004741	4	0.000894	55	Granulibacter	Komagataeibacter	0.005508	1
0.003474	2	Sediminibacter	0.002914	1	Methanosaeta	0.003558	3	Granulicatella	0.004269	4	Candidatus Atelocyanobacterium	0.004014	4	Syntrophus	0.004538	2	Mesoflavibacter	0.004849	2	Sideroxydans	0.003004	1	Desulfococcus	0.003617	1	Knoellia	0.004741	4	0.000894	55	Spiribacter	Candidatus Stoquefichus	0.005508	1
0.003474	2	Maribius	0.002914	1	Methanococcoides	0.003558	3	Olsenella	0.004269	4	Anditalea	0.004014	4	Leucothrix	0.004538	2	Reyranella	0.004849	2	Conchiformibius	0.003004	1	Desulfomicrobium	0.003617	1	Prauserella	0.004741	4	0.000878	54	Escherichia	Paenirhodobacter	0.005508	1
0.003474	2	Actinocatenispora	0.002914	1	Archaeoglobus	0.003558	3	Natronorubrum	0.004269	4	Intestinibacter	0.004014	4	Pseudobutyrivibrio	0.004538	2	Eudoraea	0.004849	2	Halostagnicola	0.003004	1	Acidaminococcus	0.003617	1	Methanothermobacter	0.004741	4	0.000878	54	Xenorhabdus	Draconibacterium	0.005508	1
0.003474	2	Terriglobus	0.002914	1	Pyrococcus	0.003558	3	Halorhabdus	0.004269	4	Tyzzerella	0.004014	4	Mesoplasma	0.004538	2	Adlercreutzia	0.004849	2	Castellaniella	0.003004	1	Nitrobacter	0.003617	1	Thermosynechococcus	0.004741	4	0.000878	54	Thiobacillus	Anditalea	0.005508	1
0.003474	2	Desulfurispirillum	0.002914	1	Desulfurococcus	0.003558	3	Azospira	0.004269	4	Pararhodospirillum	0.004014	4	Nakamurella	0.004538	2	Simiduia	0.004849	2	Patulibacter	0.003004	1	Thiovulum	0.003617	1	Halorhabdus	0.004741	4	0.000878	54	Mitsuokella	Terrisporobacter	0.005508	1
0.003474	2	Aestuariimicrobium	0.002914	1	Methanosphaera	0.003558	3	Thermobrachium	0.004269	4	Caldisalinibacter	0.004014	4	Octadecabacter	0.004538	2	Mangrovibacter	0.004849	2	Belnapia	0.003004	1	Ehrlichia	0.003617	1	Salinibacter	0.004741	4	0.000878	54	Tatumella	Gottschalkia	0.005508	1
0.003474	2	Deefgea	0.002914	1	Methanopyrus	0.003558	3	Anaeroarcus	0.004269	4	Pseudodonghicola	0.004014	4	Chroococcidiopsis	0.004538	2	Candidatus Cloacimonas	0.004849	2	Haladaptatus	0.003004	1	Saprospira	0.003617	1	Azovibrio	0.004741	4	0.000878	54	Pandoraea	Candidatus Babela	0.005508	1
0.003474	2	Actinomycetospora	0.002914	1	Flexistipes	0.003558	3	Starkeya	0.004269	4	Pseudopedobacter	0.004014	4	Nesterenkonia	0.004538	2	Haliea	0.004849	2	Aciduliprofundum	0.003004	1	Weeksella	0.003617	1	Finegoldia	0.004741	4	0.000878	54	Haloterrigena	Saccharicrinis	0.005508	1
0.003474	2	Aureimonas	0.002914	1	Arhodomonas	0.003558	3	Ahrensia	0.004269	4	Xanthomarina	0.004014	4	Spirillospora	0.004538	2	Thermogladius	0.004849	2	Halalkalibacillus	0.003004	1	Beggiatoa	0.003617	1	Ahrensia	0.004741	4	0.000878	54	Pseudorhizobium	Euryhalocaulis	0.005508	1
0.003474	2	Mucilaginibacter	0.002914	1	Epulopiscium	0.003558	3	Magnetococcus	0.004269	4	Parageobacillus	0.004014	4	Bergeyella	0.004538	2	Viridibacillus	0.004849	2	Desulfurispirillum	0.003004	1	Prosthecochloris	0.003617	1	Oceanicaulis	0.004741	4	0.000878	54	Cutibacterium	Paeniglutamicibacter	0.005508	1
0.003474	2	Coraliomargarita	0.002914	1	Roseobacter	0.003558	3	Oerskovia	0.004269	4	Acidipropionibacterium	0.004014	4	Desulfurobacterium	0.004538	2	Sediminibacterium	0.004849	2	Methanoregula	0.003004	1	Chlorogloeopsis	0.003617	1	Aequorivita	0.004741	4	0.000878	54	Haematomicrobium	Lunatimonas	0.005508	1
0.003474	2	Chelativorans	0.002914	1	Heliobacterium	0.003558	3	Kaistia	0.004269	4	Ochrovirga	0.004014	4	Mannheimia	0.004538	2	Aliivibrio	0.004849	2	Aestuariimicrobium	0.003004	1	Anabaena	0.003617	1	Gallibacterium	0.004741	4	0.000861	53	Roseibium	Acidipropionibacterium	0.005508	1
0.003474	2	Rudanella	0.002914	1	Gardnerella	0.003558	3	Ilyobacter	0.003202	3	Ochrobactrum	0.004014	4	Halothece	0.004538	2	Clostridiisalibacter	0.004849	2	Fulvivirga	0.003004	1	Micrococcus	0.003617	1	Methanothermococcus	0.004741	4	0.000861	53	Stackebrandtia	Candidatus Izimaplasma	0.005508	1
0.003474	2	Kiloniella	0.002914	1	Aquifex	0.003558	3	Salinispora	0.003202	3	Eikenella	0.004014	4	Actinobaculum	0.004538	2	Salinimicrobium	0.004849	2	Barnesiella	0.003004	1	Marinococcus	0.003617	1	Cellulosimicrobium	0.004741	4	0.000861	53	Aliivibrio	Ochrovirga	0.005508	1
0.003474	2	Balneola	0.002914	1	Synergistes	0.003558	3	Citricoccus	0.003202	3	Klebsiella	0.004014	4	Caldivirga	0.004538	2	Zhouia	0.004849	2	Desulfurivibrio	0.003004	1	Planococcus	0.003617	1	Trabulsiella	0.004741	4	0.000845	52	Methylomonas	Hugenholtzia	0.005508	1
0.003474	2	Saccharibacillus	0.002914	1	Anaerobiospirillum	0.003558	3	Allobaculum	0.003202	3	Morganella	0.004014	4	Cylindrospermopsis	0.004538	2	Pseudogulbenkiania	0.004849	2	Tumebacillus	0.003004	1	Atopobium	0.003617	1	Yokenella	0.004741	4	0.000845	52	Xylella	Pacificimonas	0.005508	1
0.003474	2	Elioraea	0.002914	1	Sulfobacillus	0.003558	3	Lentibacillus	0.003202	3	Coxiella	0.004014	4	Delftia	0.004538	2	Hellea	0.004849	2	Coraliomargarita	0.003004	1	Alloiococcus	0.003617	1	Marinitoga	0.003556	3	0.000845	52	Citricoccus	Phenylobacterium	0.005508	1
0.003474	2	Neptuniibacter	0.002914	1	Acidothermus	0.003558	3	Cetobacterium	0.003202	3	Wolinella	0.004014	4	Budvicia	0.004538	2	Butyricimonas	0.004849	2	Chloracidobacterium	0.003004	1	Streptosporangium	0.003617	1	Magnetococcus	0.003556	3	0.000845	52	Isoptericola	Arsenophonus	0.005508	1
0.003474	2	Singulisphaera	0.002914	1	Rhodoferax	0.003558	3	Kribbella	0.003202	3	Desulfuromonas	0.004014	4	Thermobifida	0.004538	2	Haloferula	0.004849	2	Terribacillus	0.003004	1	Thermomonospora	0.003617	1	Oerskovia	0.003556	3	0.000845	52	Shinella	Hydrogenobacter	0.005508	1
0.003474	2	Haloplasma	0.002914	1	Rubrivivax	0.003558	3	Acetoanaerobium	0.003202	3	Hydrogenobacter	0.004014	4	Propionispira	0.004538	2	Rubidibacter	0.004849	2	Oscillibacter	0.003004	1	Tropheryma	0.003617	1	Lechevalieria	0.003556	3	0.000845	52	Kushneria	Rhodobacter	0.005508	1
0.003474	2	Methanosphaerula	0.002914	1	Phyllobacterium	0.003558	3	Dorea	0.003202	3	Rhodomicrobium	0.004014	4	Slackia	0.004538	2	Chitiniphilus	0.004849	2	Haliea	0.003004	1	Aeromicrobium	0.003617	1	Salinispora	0.003556	3	0.000845	52	Mobilicoccus	Rhodospirillum	0.005508	1
0.003474	2	Parvimonas	0.002914	1	Thermonema	0.003558	3	Leisingera	0.003202	3	Nitrospira	0.004014	4	Eggerthella	0.004538	2	Robinsoniella	0.004849	2	Methanolinea	0.003004	1	Pimelobacter	0.003617	1	Citricoccus	0.003556	3	0.000845	52	Candidatus Methylomirabilis	Planococcus	0.005508	1
0.003474	2	Zhouia	0.002914	1	Brachymonas	0.003558	3	Caldisphaera	0.003202	3	Micrococcus	0.004014	4	Marichromatium	0.004538	2	Aliihoeflea	0.004849	2	Glaciibacter	0.003004	1	Methanobrevibacter	0.003617	1	Halosimplex	0.003556	3	0.000845	52	Euryhalocaulis	Aerococcus	0.005508	1
0.003474	2	Candidatus Regiella	0.002914	1	Desulfobacula	0.003558	3	Longispora	0.003202	3	Alloiococcus	0.004014	4	Halorhodospira	0.004538	2	Spongiibacter	0.004849	2	Syntrophorhabdus	0.003004	1	Methanocorpusculum	0.003617	1	Thermovibrio	0.003556	3	0.000829	51	Methylobacillus	Renibacterium	0.005508	1
0.003474	2	Hellea	0.002914	1	Hydrogenovibrio	0.003558	3	Faecalibacterium	0.003202	3	Streptosporangium	0.004014	4	Aquabacterium	0.004538	2	Indibacter	0.004849	2	Thalassobaculum	0.003004	1	Staphylothermus	0.003617	1	Allobaculum	0.003556	3	0.000829	51	Holophaga	Thermomonospora	0.005508	1
0.003474	2	Haloferula	0.002914	1	Syntrophobacter	0.003558	3	Saccharibacter	0.003202	3	Aeromicrobium	0.004014	4	Desulfotalea	0.004538	2	Candidatus Koribacter	0.004849	2	Zhouia	0.003004	1	Sulfolobus	0.003617	1	Shuttleworthia	0.003556	3	0.000829	51	Methanoculleus	Sphaerobacter	0.005508	1
0.003474	2	Robinsoniella	0.002914	1	Rhodothermus	0.003558	3	Mesonia	0.003202	3	Methanohalophilus	0.004014	4	Muricauda	0.004538	2	Oceanibaculum	0.004849	2	Butyricimonas	0.003004	1	Haliscomenobacter	0.003617	1	Cetobacterium	0.003556	3	0.000829	51	Rhodovibrio	Tsukamurella	0.005508	1
0.003474	2	Aliihoeflea	0.002914	1	Thiomonas	0.003558	3	Crinalium	0.003202	3	Halobacterium	0.004014	4	Carboxydothermus	0.004538	2	Dehalogenimonas	0.004849	2	Paraprevotella	0.003004	1	Flexistipes	0.003617	1	Aurantimonas	0.003556	3	0.000829	51	Pelagibaca	Methanospirillum	0.005508	1
0.003474	2	Smaragdicoccus	0.002914	1	Sebaldella	0.003558	3	Loktanella	0.003202	3	Natronobacterium	0.004014	4	Limnobacter	0.004538	2	Salinarimonas	0.004849	2	Butyricicoccus	0.003004	1	Acetonema	0.003617	1	Kribbella	0.003556	3	0.000829	51	Mesoflavibacter	Methanolobus	0.005508	1
0.003474	2	Limnohabitans	0.002914	1	Leptonema	0.003558	3	Aestuariibacter	0.003202	3	Staphylothermus	0.004014	4	Halorhabdus	0.004538	2	Gallaecimonas	0.004849	2	Robinsoniella	0.003004	1	Fervidobacterium	0.003617	1	Varibaculum	0.003556	3	0.000829	51	Spongiibacter	Desulfosarcina	0.005508	1
0.003474	2	Dehalogenimonas	0.002914	1	Rothia	0.003558	3	Lebetimonas	0.003202	3	Methanosphaera	0.004014	4	Gallibacterium	0.004538	2	Ignavibacterium	0.004849	2	Smaragdicoccus	0.003004	1	Cardiobacterium	0.003617	1	Marinithermus	0.003556	3	0.000829	51	Candidatus Rubidus	Methanopyrus	0.005508	1
0.003474	2	Ilumatobacter	0.002914	1	Halothermothrix	0.003558	3	Candidatus Amoebophilus	0.003202	3	Synergistes	0.004014	4	Salinispora	0.004538	2	Fibrella	0.004849	2	Ruania	0.003004	1	Hirschia	0.003617	1	Caldithrix	0.003556	3	0.000829	51	Candidatus Izimaplasma	Flexistipes	0.005508	1
0.003474	2	Fervidicoccus	0.002914	1	Desulfurella	0.003558	3	Candidatus Protochlamydia	0.003202	3	Acidianus	0.004014	4	Tistrella	0.004538	2	Halonotius	0.004849	2	Solibacillus	0.003004	1	Acidianus	0.003617	1	Thalassolituus	0.003556	3	0.000829	51	Bernardetia	Acetonema	0.005508	1
0.003474	2	Bavariicoccus	0.002914	1	Acetobacterium	0.003558	3	Winogradskyella	0.003202	3	Rubrivivax	0.004014	4	Anaerophaga	0.004538	2	Celeribacter	0.004849	2	Candidatus Koribacter	0.003004	1	Chelatococcus	0.003617	1	Enterovibrio	0.003556	3	0.000813	50	Ehrlichia	Heliobacterium	0.005508	1
0.003474	2	Cellulosilyticum	0.002914	1	Melissococcus	0.003558	3	Sulfuricurvum	0.003202	3	Ornithobacterium	0.004014	4	Marinithermus	0.004538	2	Gilvimarinus	0.004849	2	Chelonobacter	0.003004	1	Petrotoga	0.003617	1	Nautilia	0.003556	3	0.000813	50	Microtetraspora	Aquifex	0.005508	1
0.003474	2	Solitalea	0.002914	1	Blattabacterium	0.003558	3	Aminiphilus	0.003202	3	Caedibacter	0.004014	4	Microvirga	0.004538	2	Flavonifractor	0.004849	2	Jejuia	0.003004	1	Arcanobacterium	0.003617	1	Pelotomaculum	0.003556	3	0.000813	50	Natronobacterium	Synergistes	0.005508	1
0.003474	2	Polymorphum	0.002914	1	Streptobacillus	0.003558	3	Martelella	0.003202	3	Thiomonas	0.004014	4	Pelotomaculum	0.004538	2	Mobilicoccus	0.004849	2	Thermogemmatispora	0.003004	1	Hydrogenovibrio	0.003617	1	Nanoarchaeum	0.003556	3	0.000813	50	Thermoanaerobacterium	Thiocystis	0.005508	1
0.003474	2	Catelliglobosispora	0.002914	1	Acetivibrio	0.003558	3	Desulfitibacter	0.003202	3	Leptonema	0.004014	4	Methanotorris	0.004538	2	Fimbriimonas	0.004849	2	Marivirga	0.003004	1	Thermoanaerobacterium	0.003617	1	Caldisphaera	0.003556	3	0.000813	50	Mesoplasma	Acetohalobium	0.005508	1
0.003474	2	Fodinicurvata	0.002914	1	Bilophila	0.003558	3	Haloquadratum	0.003202	3	Rothia	0.004014	4	Collimonas	0.004538	2	Pseudoflavonifractor	0.004849	2	Bryobacter	0.003004	1	Microlunatus	0.003617	1	Alicycliphilus	0.003556	3	0.000813	50	Tolypothrix	Chelatococcus	0.005508	1
0.003474	2	Porticoccus	0.002914	1	Holophaga	0.003558	3	Proteiniphilum	0.003202	3	Kinetoplastibacterium	0.004014	4	Candidatus Blochmannia	0.004538	2	Fortiea	0.004849	2	Fimbriimonas	0.003004	1	Veillonella	0.003617	1	Collimonas	0.003556	3	0.000813	50	Oerskovia	Desulfobacula	0.005508	1
0.003474	2	Austwickia	0.002914	1	Dermabacter	0.003558	3	Adhaeribacter	0.003202	3	Agromyces	0.004014	4	Skermanella	0.004538	2	Lonsdalea	0.004849	2	Pseudoflavonifractor	0.003004	1	Syntrophobacter	0.003617	1	Halomicrobium	0.003556	3	0.000813	50	Caminibacter	Thiomonas	0.005508	1
0.003474	2	Gilliamella	0.002914	1	Desulfitobacterium	0.003558	3	Herminiimonas	0.003202	3	Melissococcus	0.004014	4	Gemmobacter	0.004538	2	Nodosilinea	0.004849	2	Candidatus Caldiarchaeum	0.003004	1	Rhodothermus	0.003617	1	Parvularcula	0.003556	3	0.000813	50	Faecalibacterium	Rothia	0.005508	1
0.003474	2	Gryllotalpicola	0.002914	1	Dialister	0.003558	3	Pusillimonas	0.003202	3	Rhodovulum	0.004014	4	Desulfonauticus	0.004538	2	Methyloferula	0.004849	2	Commensalibacter	0.003004	1	Aminobacter	0.003617	1	Oceanithermus	0.003556	3	0.000813	50	Uliginosibacterium	Acidobacterium	0.005508	1
0.003474	2	Gayadomonas	0.002914	1	Candidatus Magnetobacterium	0.003558	3	Methylibium	0.003202	3	Acetivibrio	0.004014	4	Parvularcula	0.004538	2	Diplosphaera	0.004849	2	Methanomassiliicoccus	0.003004	1	Sebaldella	0.003617	1	Enhygromyxa	0.003556	3	0.000813	50	Clostridiisalibacter	Rhodovulum	0.005508	1
0.003474	2	Mariniradius	0.002914	1	Sutterella	0.003558	3	Saccharophagus	0.003202	3	Holophaga	0.004014	4	Micavibrio	0.004538	2	Proteiniclasticum	0.004849	2	Lonsdalea	0.003004	1	Rothia	0.003617	1	Croceibacter	0.003556	3	0.000813	50	Robinsoniella	Streptobacillus	0.005508	1
0.003474	2	Candidatus Ancillula	0.002914	1	Lawsonia	0.003558	3	Leadbetterella	0.003202	3	Dermabacter	0.004014	4	Faecalibacterium	0.004538	2	Candidatus Methylomirabilis	0.004849	2	Fodinicurvata	0.003004	1	Candidatus Phytoplasma	0.003617	1	Formosa	0.003556	3	0.000813	50	Chthonomonas	Nitrococcus	0.005508	1
0.003474	2	Arcticibacter	0.002914	1	Rubrobacter	0.003558	3	Cohnella	0.003202	3	Methylomicrobium	0.004014	4	Thermodesulfobium	0.004538	2	Austwickia	0.004849	2	Porticoccus	0.003004	1	Melissococcus	0.003617	1	Saccharospirillum	0.003556	3	0.000813	50	Methanomassiliicoccus	Nitrospina	0.005508	1
0.003474	2	Pluralibacter	0.002914	1	Tolumonas	0.003558	3	Halalkalicoccus	0.003202	3	Candidatus Magnetobacterium	0.004014	4	Jeotgalicoccus	0.004538	2	Candidatus Ancillula	0.004849	2	Cesiribacter	0.003004	1	Acidobacterium	0.003617	1	Mesonia	0.003556	3	0.000813	50	Pseudarthrobacter	Dietzia	0.005508	1
0.003474	2	Schleiferia	0.002914	1	Moorella	0.003558	3	Ignisphaera	0.003202	3	Ewingella	0.004014	4	Dyella	0.004538	2	Algiphilus	0.004849	2	Melioribacter	0.003004	1	Neorickettsia	0.003617	1	Candidatus Portiera	0.003556	3	0.000796	49	Thermoproteus	Methylomicrobium	0.005508	1
0.003474	2	Pseudohaliea	0.002914	1	Holospora	0.003558	3	Candidatus Sulcia	0.003202	3	Tolumonas	0.004014	4	Loktanella	0.004538	2	Salinarchaeum	0.004849	2	Allokutzneria	0.003004	1	Rhodovulum	0.003617	1	Salinibacterium	0.003556	3	0.000796	49	Sporomusa	Dialister	0.005508	1
0.003474	2	Noviherbaspirillum	0.002914	1	Leucothrix	0.003558	3	Nitrosopumilus	0.003202	3	Catonella	0.004014	4	Grimontia	0.004538	2	Eggerthia	0.004849	2	Moorea	0.003004	1	Liberibacter	0.003617	1	Akkermansia	0.003556	3	0.000796	49	Candidatus Phytoplasma	Halobacteroides	0.005508	1
0.003474	2	Candidatus Methanoperedens	0.002914	1	Desulfohalobium	0.003558	3	Paucisalibacillus	0.003202	3	Ferrimonas	0.004014	4	Mahella	0.004538	2	Alloprevotella	0.004849	2	Lachnoanaerobaculum	0.003004	1	Rahnella	0.003617	1	Crinalium	0.003556	3	0.000796	49	Polynucleobacter	Moorella	0.005508	1
0.003474	2	Actibacterium	0.002914	1	Geovibrio	0.003558	3	Simplicispira	0.003202	3	Salinicoccus	0.004014	4	Natronolimnobius	0.004538	2	Arcticibacter	0.004849	2	Catenovulum	0.003004	1	Cycloclasticus	0.003617	1	Anaerotruncus	0.003556	3	0.000796	49	Leucothrix	Geothrix	0.005508	1
0.003474	2	Falsirhodobacter	0.002914	1	Oenococcus	0.003558	3	Verminephrobacter	0.003202	3	Methanoculleus	0.004014	4	Arsenicicoccus	0.004538	2	Fictibacillus	0.004849	2	Gayadomonas	0.003004	1	Bilophila	0.003617	1	Raphidiopsis	0.003556	3	0.000796	49	Thiorhodovibrio	Geovibrio	0.005508	1
0.003474	2	Kallipyga	0.002914	1	Dethiosulfovibrio	0.003558	3	Haematobacter	0.003202	3	Geovibrio	0.004014	4	Lebetimonas	0.004538	2	Coprobacter	0.004849	2	Nafulsella	0.003004	1	Holophaga	0.003617	1	Gillisia	0.003556	3	0.000796	49	Prauserella	Pseudobutyrivibrio	0.005508	1
0.003474	2	Erysipelatoclostridium	0.002914	1	Hydrogenophaga	0.003558	3	Haladaptatus	0.003202	3	Pseudobutyrivibrio	0.004014	4	Curvibacter	0.004538	2	Aliiglaciecola	0.004849	2	Phaseolibacter	0.003004	1	Candidatus Magnetobacterium	0.003617	1	Grimontia	0.003556	3	0.000796	49	Ahrensia	Gelidibacter	0.005508	1
0.003474	2	Gottschalkia	0.002914	1	Gelidibacter	0.003558	3	Flaviramulus	0.003202	3	Mesoplasma	0.004014	4	Candidatus Protochlamydia	0.004538	2	Candidatus Latescibacter	0.004849	2	Kosakonia	0.003004	1	Sutterella	0.003617	1	Crocinitomix	0.003556	3	0.000796	49	Thermodesulfatator	Tetragenococcus	0.005508	1
0.003474	2	Thalassotalea	0.002914	1	Acetomicrobium	0.003558	3	Olivibacter	0.003202	3	Oenococcus	0.004014	4	Segniliparus	0.004538	2	Candidatus Microgenomatus	0.004849	2	Anaerosalibacter	0.003004	1	Ewingella	0.003617	1	Natronolimnobius	0.003556	3	0.000796	49	Pontibacter	Myxosarcina	0.005508	1
0.003474	2	Candidatus Paracaedibacter	0.002914	1	Acidocella	0.003558	3	Sediminibacter	0.003202	3	Acetomicrobium	0.004014	4	Kordiimonas	0.004538	2	Actibacterium	0.004849	2	Lutibaculum	0.003004	1	Lawsonia	0.003617	1	Ethanoligenens	0.003556	3	0.000796	49	Elusimicrobium	Xenococcus	0.005508	1
0.003474	2	Salinispira	0.002914	1	Syntrophobotulus	0.003558	3	Halopiger	0.003202	3	Salinivibrio	0.004014	4	Acaricomes	0.004538	2	Thermophagus	0.004849	2	Actibacterium	0.003004	1	Candidatus Microthrix	0.003617	1	Gulosibacter	0.003556	3	0.000796	49	Ilumatobacter	Lamprocystis	0.005508	1
0.003474	2	Paraglaciecola	0.002914	1	Wigglesworthia	0.003558	3	Deefgea	0.003202	3	Ignicoccus	0.004014	4	Martelella	0.004538	2	Paenirhodobacter	0.004849	2	Komagataeibacter	0.003004	1	Jonesia	0.003617	1	Lentisphaera	0.003556	3	0.00078	48	Marinococcus	Cylindrospermum	0.005508	1
0.003474	2	Caldisalinibacter	0.002914	1	Salinivibrio	0.003558	3	Zunongwangia	0.003202	3	Cylindrospermum	0.004014	4	Proteiniphilum	0.004538	2	Chitinivibrio	0.004849	2	Enorma	0.003004	1	Tolumonas	0.003617	1	Pleomorphomonas	0.003556	3	0.00078	48	Dermabacter	Rickettsiella	0.005508	1
0.003474	2	Thermorudis	0.002914	1	Mitsuokella	0.003558	3	Alloscardovia	0.003202	3	Dehalobacter	0.004014	4	Rubellimicrobium	0.004538	2	Terrisporobacter	0.004849	2	Kallipyga	0.003004	1	Polynucleobacter	0.003617	1	Trichormus	0.003556	3	0.00078	48	Lacinutrix	Marinilabilia	0.005508	1
0.003474	2	Halobacteriovorax	0.002914	1	Polaribacter	0.003558	3	Salsuginibacillus	0.003202	3	Dehalococcoides	0.004014	4	Candidatus Hepatoplasma	0.004538	2	Intestinibacter	0.004849	2	Sedimentitalea	0.003004	1	Filifactor	0.003617	1	Owenweeksia	0.003556	3	0.00078	48	Gramella	Orientia	0.005508	1
0.003474	2	Actinotignum	0.002914	1	Janibacter	0.003558	3	Dethiobacter	0.003202	3	Demetria	0.004014	4	Algicola	0.004538	2	Thalassotalea	0.004849	2	Faecalitalea	0.003004	1	Geothrix	0.003617	1	Geopsychrobacter	0.003556	3	0.00078	48	Olleya	Brenneria	0.005508	1
0.003474	2	Levyella	0.002914	1	Nakamurella	0.003558	3	Reyranella	0.003202	3	Marinospirillum	0.004014	4	Phaeobacter	0.004538	2	Niveispirillum	0.004849	2	Franconibacter	0.003004	1	Leucothrix	0.003617	1	Jiangella	0.003556	3	0.00078	48	Henriciella	Citromicrobium	0.005508	1
0.003474	2	Paenarthrobacter	0.002914	1	Hyperthermus	0.003558	3	Eudoraea	0.003202	3	Citromicrobium	0.004014	4	Methylibium	0.004538	2	Paraglaciecola	0.004849	2	Hungatella	0.003004	1	Desulfohalobium	0.003617	1	Curvibacter	0.003556	3	0.00078	48	Paeniclostridium	Methylocaldum	0.005508	1
0.003474	2	Paraclostridium	0.002914	1	Thermosphaera	0.003558	3	Desulfonatronospira	0.003202	3	Thermaerobacter	0.004014	4	Saccharophagus	0.004538	2	Mageeibacillus	0.004849	2	Halobacteriovorax	0.003004	1	Methanoculleus	0.003617	1	Candidatus Protochlamydia	0.003556	3	0.000764	47	Thermomonospora	Ferroplasma	0.005508	1
0.003474	2	Candidatus Rubidus	0.002914	1	Planktothrix	0.003558	3	Candidatus Korarchaeum	0.003202	3	Mannheimia	0.004014	4	Pontibacter	0.004538	2	Pseudothermotoga	0.004849	2	Actinotignum	0.003004	1	Dethiosulfovibrio	0.003617	1	Leeuwenhoekiella	0.003556	3	0.000764	47	Methanosaeta	Mannheimia	0.005508	1
0.003474	2	Xanthomarina	0.002914	1	Cylindrospermum	0.003558	3	Glaciibacter	0.003202	3	Succinispira	0.004014	4	Halalkalicoccus	0.004538	2	Gimesia	0.004849	2	Paeniglutamicibacter	0.003004	1	Lautropia	0.003617	1	Thioclava	0.003556	3	0.000764	47	Marinithermus	Halothece	0.005508	1
0.003474	2	Sediminispirochaeta	0.002914	1	Nesterenkonia	0.003558	3	Aliivibrio	0.003202	3	Aminobacterium	0.004014	4	Truepera	0.004538	2	Hungatella	0.004849	2	Vermiphilus	0.003004	1	Candidatus Arthromitus	0.003617	1	Alkaliflexus	0.003556	3	0.000764	47	Lentisphaera	Mycetocola	0.005508	1
0.003474	2	Cutibacterium	0.002914	1	Dermacoccus	0.003558	3	Zhouia	0.003202	3	Tatumella	0.004014	4	Pelagibaca	0.004538	2	Pseudodonghicola	0.004849	2	Lunatimonas	0.003004	1	Psychroserpens	0.003617	1	Kordiimonas	0.003556	3	0.000764	47	Fluviicola	Buttiauxella	0.005508	1
0.003474	2	Bernardetia	0.002914	1	Sulfurospirillum	0.003558	3	Pseudogulbenkiania	0.003202	3	Luteimonas	0.004014	4	Verminephrobacter	0.004538	2	Thermorudis	0.004849	2	Paeniclostridium	0.003004	1	Tetragenococcus	0.003617	1	Salinimonas	0.003556	3	0.000764	47	Congregibacter	Thermobifida	0.005508	1
0.003474	2	Hugenholtzia	0.002914	1	Moritella	0.003558	3	Butyricicoccus	0.003202	3	Asaia	0.004014	4	Haematobacter	0.004538	2	Halobacteriovorax	0.004849	2	Acidipropionibacterium	0.003004	1	Mitsuokella	0.003617	1	Advenella	0.003556	3	0.000764	47	Chloracidobacterium	Succinivibrio	0.005508	1
0.003474	2	Pacificimonas	0.002914	1	Marinilabilia	0.003558	3	Sciscionella	0.003202	3	Pandoraea	0.004014	4	Haladaptatus	0.004538	2	Euryhalocaulis	0.004849	2	Ochrovirga	0.003004	1	Xenococcus	0.003617	1	Aminiphilus	0.003556	3	0.000764	47	Shimazuella	Propionispira	0.005508	1
0.001737	1	Phenylobacterium	0.002914	1	Desulfobacca	0.003558	3	Solibacillus	0.003202	3	Collinsella	0.004014	4	Flaviramulus	0.004538	2	Tepidicaulis	0.004849	2	Bernardetia	0.003004	1	Janibacter	0.003617	1	Lacinutrix	0.003556	3	0.000764	47	Viridibacillus	Slackia	0.005508	1
0.001737	1	Herpetosiphon	0.002914	1	Holdemania	0.003558	3	Gracilimonas	0.003202	3	Tenacibaculum	0.004014	4	Aciduliprofundum	0.004538	2	Paenarthrobacter	0.002424	1	Simonsiella	0.003004	1	Acidimicrobium	0.003617	1	Thermosediminibacter	0.003556	3	0.000764	47	Fictibacillus	Beutenbergia	0.005508	1
0.001737	1	Simonsiella	0.002914	1	Natronomonas	0.003558	3	Chelonobacter	0.003202	3	Anaerovorax	0.004014	4	Maribius	0.004538	2	Pseudarthrobacter	0.002424	1	Eikenella	0.003004	1	Octadecabacter	0.003617	1	Laceyella	0.003556	3	0.000748	46	Fibrobacter	Pandoraea	0.005508	1
0.001737	1	Azotobacter	0.002914	1	Nevskia	0.003558	3	Jejuia	0.003202	3	Alishewanella	0.004014	4	Actinocatenispora	0.004538	2	Clostridioides	0.002424	1	Hafnia	0.003004	1	Hyperthermus	0.003617	1	Gramella	0.003556	3	0.000748	46	Streptobacillus	Chloroherpeton	0.005508	1
0.001737	1	Methylococcus	0.002914	1	Desulfurobacterium	0.003558	3	Caldanaerobius	0.003202	3	Tolypothrix	0.004014	4	Barnesiella	0.004538	2	Parageobacillus	0.002424	1	Kluyvera	0.003004	1	Pyrolobus	0.003617	1	Silanimonas	0.003556	3	0.000748	46	Nitrosospira	Collinsella	0.005508	1
0.001737	1	Methylomonas	0.002914	1	Borreliella	0.003558	3	Rudaea	0.003202	3	Ignatzschineria	0.004014	4	Tumebacillus	0.004538	2	Haematomicrobium	0.002424	1	Morganella	0.003004	1	Ignicoccus	0.003617	1	Chthoniobacter	0.003556	3	0.000748	46	Salinisphaera	Oscillochloris	0.005508	1
0.001737	1	Methylobacter	0.002914	1	Marinospirillum	0.003558	3	Sulfuricella	0.003202	3	Pseudoramibacter	0.004014	4	Joostella	0.004538	2	Pacificimonas	0.002424	1	Salmonella	0.003004	1	Ferroglobus	0.003617	1	Candidatus Hepatoplasma	0.003556	3	0.000748	46	Persephonella	Muricauda	0.005508	1
0.001737	1	Eikenella	0.002914	1	Facklamia	0.003558	3	Polymorphum	0.003202	3	Denitrovibrio	0.004014	4	Kiloniella	0.002269	1	Methylophilus	0.002424	1	Anaplasma	0.003004	1	Dehalobacter	0.003617	1	Adhaeribacter	0.003556	3	0.000748	46	Niabella	Ignatzschineria	0.005508	1
0.001737	1	Escherichia	0.002914	1	Coprothermobacter	0.003558	3	Candidatus Nitrosoarchaeum	0.003202	3	Pectobacterium	0.004014	4	Candidatus Cloacimonas	0.002269	1	Leptothrix	0.002424	1	Fibrobacter	0.003004	1	Microvirgula	0.003617	1	Pusillimonas	0.003556	3	0.000748	46	Eudoraea	Zobellia	0.005508	1
0.001737	1	Klebsiella	0.002914	1	Orientia	0.003558	3	Pseudoflavonifractor	0.003202	3	Ornithinimicrobium	0.004014	4	Elioraea	0.002269	1	Flectobacillus	0.002424	1	Oxalobacter	0.003004	1	Thiorhodococcus	0.003617	1	Elizabethkingia	0.003556	3	0.000748	46	Chelativorans	Granulicatella	0.005508	1
0.001737	1	Morganella	0.002914	1	Cryobacterium	0.003558	3	Methanomassiliicoccus	0.003202	3	Oceanimonas	0.004014	4	Haloplasma	0.002269	1	Xanthobacter	0.002424	1	Syntrophomonas	0.003004	1	Nesterenkonia	0.003617	1	Dinoroseobacter	0.003556	3	0.000748	46	Haliea	Chrysiogenes	0.005508	1
0.001737	1	Pasteurella	0.002914	1	Macrococcus	0.003558	3	Allokutzneria	0.003202	3	Olsenella	0.004014	4	Desulfonatronospira	0.002269	1	Methylococcus	0.002424	1	Acidaminococcus	0.003004	1	Rickettsiella	0.003617	1	Emticicia	0.003556	3	0.000748	46	Catenovulum	Bulleidia	0.005508	1
0.001737	1	Desulfuromonas	0.002914	1	Frateuria	0.003558	3	Proteiniclasticum	0.003202	3	Salegentibacter	0.004014	4	Geminicoccus	0.002269	1	Fluoribacter	0.002424	1	Wolbachia	0.003004	1	Halogeometricum	0.003617	1	Sideroxydans	0.003556	3	0.000748	46	Anditalea	Alkalilimnicola	0.005508	1
0.001737	1	Nitrobacter	0.002914	1	Waddlia	0.003558	3	Candidatus Methylomirabilis	0.003202	3	Salinibacter	0.004014	4	Viridibacillus	0.002269	1	Thermomicrobium	0.002424	1	Weeksella	0.003004	1	Sanguibacter	0.003617	1	Pontibacter	0.003556	3	0.000731	45	Chromobacterium	Olsenella	0.005508	1
0.001737	1	Rhodomicrobium	0.002914	1	Ferroplasma	0.003558	3	Mesotoga	0.003202	3	Anaeroarcus	0.004014	4	Butyricimonas	0.002269	1	Beijerinckia	0.002424	1	Beggiatoa	0.003004	1	Dehalococcoides	0.003617	1	Dokdonia	0.003556	3	0.000731	45	Acidothermus	Prauserella	0.005508	1
0.001737	1	Prosthecochloris	0.002914	1	Thermocrinis	0.003558	3	Nafulsella	0.003202	3	Cedecea	0.004014	4	Butyricicoccus	0.002269	1	Kluyvera	0.002424	1	Microscilla	0.003004	1	Thiorhodovibrio	0.003617	1	Fluviicola	0.003556	3	0.000731	45	Lyngbya	Halorhabdus	0.005508	1
0.001737	1	Piscirickettsia	0.002914	1	Halothece	0.003558	3	Algiphilus	0.003202	3	Nodularia	0.004014	4	Wohlfahrtiimonas	0.002269	1	Morganella	0.002424	1	Ectothiorhodospira	0.003004	1	Natronomonas	0.003617	1	Conchiformibius	0.003556	3	0.000731	45	Sutterella	Starkeya	0.005508	1
0.001737	1	Pediococcus	0.002914	1	Myroides	0.003558	3	Fictibacillus	0.003202	3	Marinitoga	0.004014	4	Sciscionella	0.002269	1	Proteus	0.002424	1	Thiocapsa	0.003004	1	Marinospirillum	0.003617	1	Thermovirga	0.003556	3	0.000731	45	Segniliparus	Oceanicaulis	0.005508	1
0.001737	1	Micrococcus	0.002914	1	Actinobaculum	0.003558	3	Intestinimonas	0.003202	3	Lentzea	0.004014	4	Bermanella	0.002269	1	Salmonella	0.002424	1	Prosthecochloris	0.003004	1	Terracoccus	0.003617	1	Rhodonellum	0.003556	3	0.000731	45	Maritimibacter	Gallibacterium	0.005508	1
0.001737	1	Planococcus	0.002914	1	Caldivirga	0.003558	3	Candidatus Methanoperedens	0.003202	3	Hydrogenobaculum	0.004014	4	Smaragdicoccus	0.002269	1	Arsenophonus	0.002424	1	Chlorogloeopsis	0.003004	1	Orientia	0.003617	1	Nitrosopumilus	0.003556	3	0.000731	45	Candidatus Zinderia	Thioflavicoccus	0.005508	1
0.001737	1	Atopobium	0.002914	1	Chitinophaga	0.003558	3	Fervidicella	0.003202	3	Tistrella	0.004014	4	Maritalea	0.002269	1	Anaplasma	0.002424	1	Peptostreptococcus	0.003004	1	Macrococcus	0.003617	1	Salimicrobium	0.003556	3	0.000731	45	Mariniradius	Nodularia	0.005508	1
0.001737	1	Renibacterium	0.002914	1	Aminomonas	0.003558	3	Candidatus Latescibacter	0.003202	3	Anaerophaga	0.004014	4	Psychrilyobacter	0.002269	1	Coxiella	0.002424	1	Micrococcus	0.003004	1	Methylocaldum	0.003617	1	Sandarakinorhabdus	0.003556	3	0.000715	44	Thiovulum	Marinitoga	0.005508	1
0.001737	1	Erysipelothrix	0.002914	1	Centipeda	0.003558	3	Thermophagus	0.003202	3	Varibaculum	0.004014	4	Ruania	0.002269	1	Ruminobacter	0.002424	1	Atopobium	0.003004	1	Neptunomonas	0.003617	1	Nonlabens	0.003556	3	0.000715	44	Candidatus Arthromitus	Vulcanisaeta	0.005508	1
0.001737	1	Alloiococcus	0.002914	1	Buttiauxella	0.003558	3	Candidatus Atelocyanobacterium	0.003202	3	Methylocapsa	0.004014	4	Lacticigenium	0.002269	1	Thiovulum	0.002424	1	Erysipelothrix	0.003004	1	Actinobaculum	0.003617	1	Verminephrobacter	0.003556	3	0.000715	44	Citreicella	Lechevalieria	0.005508	1
0.001737	1	Geodermatophilus	0.002914	1	Budvicia	0.003558	3	Candidatus Stoquefichus	0.003202	3	Marinithermus	0.004014	4	Solibacillus	0.002269	1	Weeksella	0.002424	1	Alloiococcus	0.003004	1	Aminobacterium	0.003617	1	Granulibacter	0.003556	3	0.000715	44	Paenirhodobacter	Laribacter	0.005508	1
0.001737	1	Thermomonospora	0.002914	1	Leminorella	0.003558	3	Paenirhodobacter	0.003202	3	Jannaschia	0.004014	4	Kosmotoga	0.002269	1	Rhodospirillum	0.002424	1	Thermoanaerobacter	0.003004	1	Methylovorus	0.003617	1	Haematobacter	0.003556	3	0.000715	44	Thermorudis	Thermovibrio	0.005508	1
0.001737	1	Methanohalophilus	0.002914	1	Slackia	0.003558	3	Draconibacterium	0.003202	3	Caminibacter	0.004014	4	Candidatus Koribacter	0.002269	1	Nitrosococcus	0.002424	1	Geodermatophilus	0.003004	1	Anaerovibrio	0.003617	1	Caldalkalibacillus	0.003556	3	0.000699	43	Beggiatoa	Allobaculum	0.005508	1
0.001737	1	Methanocorpusculum	0.002914	1	Cryptobacterium	0.003558	3	Enorma	0.003202	3	Pelotomaculum	0.004014	4	Fibrella	0.002269	1	Pediococcus	0.002424	1	Tropheryma	0.003004	1	Tatumella	0.003617	1	Galbibacter	0.003556	3	0.000699	43	Atopobium	Proteocatella	0.005508	1
0.001737	1	Methanolobus	0.002914	1	Sodalis	0.003558	3	Peptoclostridium	0.003202	3	Terasakiella	0.004014	4	Aliagarivorans	0.002269	1	Peptostreptococcus	0.002424	1	Pimelobacter	0.003004	1	Psychroflexus	0.003617	1	Sediminibacter	0.003556	3	0.000699	43	Renibacterium	Xylanimonas	0.005508	1
0.001737	1	Methanococcoides	0.002914	1	Marichromatium	0.003558	3	Kamptonema	0.003202	3	Scardovia	0.004014	4	Bryobacter	0.002269	1	Marinococcus	0.002424	1	Methanospirillum	0.003004	1	Thermobifida	0.003617	1	Aciduliprofundum	0.003556	3	0.000699	43	Thermotoga	Acetoanaerobium	0.005508	1
0.001737	1	Natronobacterium	0.002914	1	Oligella	0.003558	3	Halapricum	0.003202	3	Caldisphaera	0.004014	4	Sulfuricella	0.002269	1	Aerococcus	0.002424	1	Methanococcoides	0.003004	1	Nonomuraea	0.003617	1	Echinicola	0.003556	3	0.000699	43	Natronococcus	Thalassolituus	0.005508	1
0.001737	1	Pyrococcus	0.002914	1	Asaia	0.003558	3	Desulfatiglans	0.003202	3	Halobiforma	0.004014	4	Pseudoflavonifractor	0.002269	1	Alloiococcus	0.002424	1	Natronobacterium	0.003004	1	Succinimonas	0.003617	1	Actinocatenispora	0.003556	3	0.000699	43	Aminobacter	Geoglobus	0.005508	1
0.001737	1	Thermofilum	0.002914	1	Aquabacterium	0.003558	3	Mucinivorans	0.003202	3	Candidatus Blochmannia	0.004014	4	Commensalibacter	0.002269	1	Thermoanaerobacter	0.002424	1	Staphylothermus	0.003004	1	Succinivibrio	0.003617	1	Terriglobus	0.003556	3	0.000699	43	Liberibacter	Leisingera	-------------------------------------------
0.001737	1	Thermoproteus	0.002914	1	Pandoraea	0.003558	3	Pararhodospirillum	0.003202	3	Skermanella	0.004014	4	Ponticaulis	0.002269	1	Thermomonospora	0.002424	1	Methanoplanus	0.003004	1	Sodalis	0.003617	1	Uliginosibacterium	0.003556	3	0.000699	43	Candidatus Microthrix	Propionimicrobium	0.56186	102
0.001737	1	Desulfurococcus	0.002914	1	Alkalibacterium	0.003558	3	Hungatella	0.003202	3	Oceanithermus	0.004014	4	Kyrpidia	0.002269	1	Curtobacterium	0.002424	1	Xylella	0.003004	1	Candidatus Odyssella	0.003617	1	Desulfurispirillum	0.003556	3	0.000699	43	Moorella	Halobiforma	18.5028	3359
0.001737	1	Desulfosarcina	0.002914	1	Methanomethylovorans	0.003558	3	Rubinisphaera	0.003202	3	Croceibacter	0.004014	4	Austwickia	0.002269	1	Mobiluncus	0.002424	1	Sporomusa	0.003004	1	Halorhodospira	0.003617	1	Methanoregula	0.003556	3	0.000699	43	Methylovorus	Candidatus Blochmannia	-------------------------------------------
0.001737	1	Methanohalobium	0.002914	1	Stanieria	0.003558	3	Thermorudis	0.003202	3	Fulvimarina	0.004014	4	Gayadomonas	0.002269	1	Methanohalophilus	0.002424	1	Heliobacterium	0.003004	1	Mogibacterium	0.003617	1	Barnesiella	0.003556	3	0.000699	43	Oscillochloris	Cobetia	53.8063	9768
0.001737	1	Flexistipes	0.002914	1	Oscillochloris	0.003558	3	Ochrovirga	0.003202	3	Kordia	0.004014	4	Pseudohaliea	0.002269	1	Methanothermus	0.002424	1	Gardnerella	0.003004	1	Marmoricola	0.003617	1	Sphaerochaeta	0.003556	3	0.000699	43	Desulfovirgula	Skermanella
0.001737	1	Xylella	0.002914	1	Tenacibaculum	0.002372	2	Flectobacillus	0.003202	3	Jeotgalicoccus	0.004014	4	Anaerosalibacter	0.002269	1	Methanocorpusculum	0.002424	1	Vagococcus	0.003004	1	Gluconacetobacter	0.003617	1	Candidatus Midichloria	0.003556	3	0.000699	43	Paenisporosarcina	Micavibrio
0.001737	1	Cardiobacterium	0.002914	1	Pelistega	0.002372	2	Xanthobacter	0.003202	3	Saccharospirillum	0.004014	4	Lutibaculum	0.002269	1	Methanococcoides	0.002424	1	Dactylococcopsis	0.003004	1	Oligella	0.003617	1	Catenulispora	0.003556	3	0.000699	43	Timonella	Fulvimarina
0.001737	1	Hirschia	0.002914	1	Anaerovorax	0.002372	2	Methylococcus	0.003202	3	Hydrocarboniphaga	0.004014	4	Fervidicella	0.002269	1	Desulfurococcus	0.002424	1	Thiocystis	0.003004	1	Ketogulonicigenium	0.003617	1	Desulfovirgula	0.003556	3	0.000683	42	Simkania	Kordia
0.001737	1	Symbiobacterium	0.002914	1	Zobellia	0.002372	2	Zymomonas	0.003202	3	Loktanella	0.004014	4	Candidatus Latescibacter	0.002269	1	Desulfobacterium	0.002424	1	Rhodoferax	0.003004	1	Tetrasphaera	0.003617	1	Robiginitomaculum	0.003556	3	0.000683	42	Aquamicrobium	Thermodesulfobium
0.001737	1	Vagococcus	0.002914	1	Pseudoramibacter	0.002372	2	Arsenophonus	0.003202	3	Aestuariibacter	0.004014	4	Paenirhodobacter	0.002269	1	Methanopyrus	0.002424	1	Phyllobacterium	0.003004	1	Alkalibacterium	0.003617	1	Mesoflavibacter	0.003556	3	0.000683	42	Parachlamydia	Saccharospirillum
0.001737	1	Lachnospira	0.002914	1	Candidatus Carsonella	0.002372	2	Fibrobacter	0.003202	3	Mahella	0.004014	4	Peptoclostridium	0.002269	1	Methanohalobium	0.002424	1	Acetohalobium	0.003004	1	Coprobacillus	0.003617	1	Reyranella	0.003556	3	0.000683	42	Enhydrobacter	Anaerolinea
0.001737	1	Lyngbya	0.002914	1	Desulfotignum	0.002372	2	Wolinella	0.003202	3	Chlorobaculum	0.004014	4	Chitinivibrio	0.002269	1	Thermotoga	0.002424	1	Petrotoga	0.003004	1	Collinsella	0.003617	1	Chelativorans	0.003556	3	0.000683	42	Jeotgalicoccus	Hydrocarboniphaga
0.001737	1	Thermonema	0.002914	1	Actinopolymorpha	0.002372	2	Acidaminococcus	0.003202	3	Thermosinus	0.004014	4	Gottschalkia	0.002269	1	Flexistipes	0.002424	1	Hydrogenovibrio	0.003004	1	Stanieria	0.003617	1	Rudanella	0.003556	3	0.000683	42	Avibacterium	Loktanella
0.001737	1	Petrotoga	0.002914	1	Denitrovibrio	0.002372	2	Weeksella	0.003202	3	Pleomorphomonas	0.004014	4	Altibacter	0.002269	1	Fervidobacterium	0.002424	1	Amphibacillus	0.003004	1	Acidilobus	0.003617	1	Balneola	0.003556	3	0.000683	42	Olivibacter	Aestuariibacter
0.001737	1	Ornithobacterium	0.002914	1	Haloterrigena	0.002372	2	Chlorogloeopsis	0.003202	3	Owenweeksia	0.004014	4	Salinispira	0.002269	1	Dactylococcopsis	0.002424	1	Microlunatus	0.003004	1	Halothiobacillus	0.003617	1	Elioraea	0.003556	3	0.000683	42	Methanoregula	Pseudoclavibacter
0.001737	1	Hydrogenovibrio	0.002914	1	Solobacterium	0.002372	2	Marinococcus	0.003202	3	Lebetimonas	0.004014	4	Franconibacter	0.002269	1	Magnetospirillum	0.002424	1	Aminobacter	0.003004	1	Anaerovorax	0.003617	1	Shimazuella	0.003556	3	0.000683	42	Romboutsia	Pseudovibrio
0.001737	1	Caedibacter	0.002914	1	Ornithinimicrobium	0.002372	2	Atopobium	0.003202	3	Geopsychrobacter	0.004014	4	Siccibacter	0.002269	1	Lyngbya	0.002424	1	Rothia	0.003004	1	Pseudoramibacter	0.003617	1	Bibersteinia	0.003556	3	0.000666	41	Saprospira	Thermosinus
0.001737	1	Amphibacillus	0.002914	1	Oceanimonas	0.002372	2	Propionibacterium	0.003202	3	Thermincola	0.004014	4	Pseudodonghicola	0.002269	1	Chelatococcus	0.002424	1	Phascolarctobacterium	0.003004	1	Candidatus Carsonella	0.003617	1	Desulfonatronospira	0.003556	3	0.000666	41	Kurthia	Arsenicicoccus
0.001737	1	Taylorella	0.002914	1	Limnobacter	0.002372	2	Tropheryma	0.003202	3	Jiangella	0.004014	4	Rubinisphaera	0.002269	1	Ornithobacterium	0.002424	1	Kinetoplastibacterium	0.003004	1	Denitrovibrio	0.003617	1	Geminicoccus	0.003556	3	0.000666	41	Thermoplasma	Lebetimonas
0.001737	1	Helcococcus	0.002914	1	Prauserella	0.002372	2	Mobiluncus	0.003202	3	Bizionia	0.004014	4	Vermiphilus	0.002269	1	Herbidospora	0.002424	1	Melissococcus	0.003004	1	Chrysiogenes	0.003617	1	Nitrososphaera	0.003556	3	0.000666	41	Leptonema	Nitratiruptor
0.001737	1	Sebaldella	0.002914	1	Salegentibacter	0.002372	2	Methanohalophilus	0.003202	3	Alkaliflexus	0.004014	4	Xanthomarina	0.002269	1	Hydrogenovibrio	0.002424	1	Cycloclasticus	0.003004	1	Methylocella	0.003617	1	Dasania	0.003556	3	0.000666	41	Acetobacterium	Candidatus Amoebophilus
0.001737	1	Desulfurella	0.002914	1	Azospira	0.002372	2	Methanospirillum	0.003202	3	Kordiimonas	0.003011	3	Phenylobacterium	0.002269	1	Caedibacter	0.002424	1	Riemerella	0.003004	1	Oceanimonas	0.003617	1	Sneathiella	0.003556	3	0.000666	41	Ferrimonas	Jiangella
0.001737	1	Coprococcus	0.002914	1	Anaeroarcus	0.002372	2	Methanolobus	0.003202	3	Aminiphilus	0.003011	3	Flectobacillus	0.002269	1	Amphibacillus	0.002424	1	Sphaerotilus	0.003004	1	Carboxydothermus	0.003617	1	Desulfurispora	0.003556	3	0.000666	41	Thermicanus	Curvibacter
0.001737	1	Kinetoplastibacterium	0.002914	1	Xenophilus	0.002372	2	Thermofilum	0.003202	3	Phaeobacter	0.003011	3	Aquaspirillum	0.002269	1	Microlunatus	0.002424	1	Holophaga	0.003004	1	Natronorubrum	0.003617	1	Syntrophorhabdus	0.003556	3	0.000666	41	Thermomonas	Candidatus Protochlamydia
0.001737	1	Coriobacterium	0.002914	1	Desulforegula	0.002372	2	Staphylothermus	0.003202	3	Pusillimonas	0.003011	3	Thermomicrobium	0.002269	1	Aminobacter	0.002424	1	Thermocrispum	0.003004	1	Prauserella	0.003617	1	Clostridiisalibacter	0.003556	3	0.000666	41	Caldithrix	Segniliparus
0.001737	1	Candidatus Phytoplasma	0.002914	1	Oceanicaulis	0.002372	2	Methanopyrus	0.003202	3	Leadbetterella	0.003011	3	Klebsiella	0.002269	1	Leptotrichia	0.002424	1	Actinokineospora	0.003004	1	Thermobispora	0.003617	1	Sharpea	0.003556	3	0.000666	41	Methylohalobius	Salinimonas
0.001737	1	Acidobacterium	0.002914	1	Aequorivita	0.002372	2	Arhodomonas	0.003202	3	Shinella	0.003011	3	Coxiella	0.002269	1	Leptonema	0.002424	1	Oligotropha	0.003004	1	Blastomonas	0.003617	1	Thalassobaculum	0.003556	3	0.000666	41	Echinicola	Acaricomes
0.001737	1	Cycloclasticus	0.002914	1	Kozakia	0.002372	2	Xylella	0.003202	3	Halalkalicoccus	0.003011	3	Wolinella	0.002269	1	Halothermothrix	0.002424	1	Sutterella	0.003004	1	Roseibium	0.003617	1	Rhodoluna	0.003556	3	0.000666	41	Desmospora	Thermosediminibacter
0.001737	1	Sphaerotilus	0.002914	1	Marinitoga	0.002372	2	Aquifex	0.003202	3	Truepera	0.003011	3	Syntrophomonas	0.002269	1	Coriobacterium	0.002424	1	Lawsonia	0.003004	1	Anaeroarcus	0.003617	1	Parvimonas	0.003556	3	0.000666	41	Shimwellia	Gramella
0.001737	1	Acetivibrio	0.002914	1	Haliangium	0.002372	2	Synergistes	0.003202	3	Rhodonellum	0.003011	3	Nitrobacter	0.002269	1	Cycloclasticus	0.002424	1	Rubrobacter	0.003004	1	Starkeya	0.003617	1	Aromatoleum	0.003556	3	0.00065	40	Nitrobacter	Chthoniobacter
0.001737	1	Methylomicrobium	0.002914	1	Vulcanisaeta	0.002372	2	Rubrivivax	0.003202	3	Paucisalibacillus	0.003011	3	Thiobacillus	0.002269	1	Nitrosospira	0.002424	1	Jonesia	0.003004	1	Ahrensia	0.003617	1	Pseudogulbenkiania	0.003556	3	0.00065	40	Thermoactinomyces	Candidatus Hepatoplasma
0.001737	1	Ammonifex	0.002914	1	Lentzea	0.002372	2	Lyngbya	0.003202	3	Halostagnicola	0.003011	3	Thiocapsa	0.002269	1	Acetivibrio	0.002424	1	Promicromonospora	0.003004	1	Aequorivita	0.003617	1	Candidatus Hamiltonella	0.003556	3	0.00065	40	Orientia	Sideroxydans
0.001737	1	Jonesia	0.002914	1	Anaerococcus	0.002372	2	Chelatococcus	0.003202	3	Granulibacter	0.003011	3	Chlorogloeopsis	0.002269	1	Thermocrispum	0.002424	1	Johnsonella	0.003004	1	Kozakia	0.003617	1	Amorphus	0.003556	3	0.00065	40	Budvicia	Halalkalicoccus
0.001737	1	Syntrophus	0.002914	1	Citricoccus	0.002372	2	Arcanobacterium	0.003202	3	Belnapia	0.003011	3	Peptostreptococcus	0.002269	1	Methylomicrobium	0.002424	1	Catonella	0.003004	1	Thiorhodospira	0.003617	1	Chitiniphilus	0.003556	3	0.00065	40	Halorhodospira	Truepera
0.001737	1	Catonella	0.002914	1	Caloranaerobacter	0.002372	2	Hydrogenovibrio	0.003202	3	Haladaptatus	0.003011	3	Aerococcus	0.002269	1	Dialister	0.002424	1	Caldicellulosiruptor	0.003004	1	Cedecea	0.003617	1	Psychrilyobacter	0.003556	3	0.00065	40	Yokenella	Ignisphaera
0.001737	1	Holospora	0.002914	1	Halosimplex	0.002372	2	Microlunatus	0.003202	3	Natranaerobius	0.003011	3	Clavibacter	0.002269	1	Ewingella	0.002424	1	Geothrix	0.003004	1	Megamonas	0.003617	1	Spongiibacter	0.003556	3	0.00065	40	Anaerotruncus	Turneriella
0.001737	1	Methanoculleus	0.002914	1	Thermovibrio	0.002372	2	Rhodothermus	0.003202	3	Aciduliprofundum	0.003011	3	Geodermatophilus	0.002269	1	Halobacteroides	0.002424	1	Desulfohalobium	0.003004	1	Roseibacterium	0.003617	1	Lacticigenium	0.003556	3	0.00065	40	Blastopirellula	Tuberibacillus
0.001737	1	Abiotrophia	0.002914	1	Allobaculum	0.002372	2	Aminobacter	0.003202	3	Niabella	0.003011	3	Thermomonospora	0.002269	1	Jonesia	0.002424	1	Geovibrio	0.003004	1	Magnetococcus	0.003617	1	Indibacter	0.003556	3	0.00065	40	Kordiimonas	Paludibacter
0.001737	1	Oenococcus	0.002914	1	Lentibacillus	0.002372	2	Kingella	0.003202	3	Methanoregula	0.003011	3	Curtobacterium	0.002269	1	Promicromonospora	0.002424	1	Agrococcus	0.003004	1	Planomicrobium	0.003617	1	Gracilimonas	0.003556	3	0.00065	40	Dokdonia	Sedimenticola
0.001737	1	Hydrogenophaga	0.002914	1	Anaerophaga	0.002372	2	Coprococcus	0.003202	3	Humibacter	0.003011	3	Mobiluncus	0.002269	1	Ferrimonas	0.002424	1	Orenia	0.003004	1	Hydrogenobaculum	0.003617	1	Kosmotoga	0.003556	3	0.00065	40	Gilliamella	Salimicrobium
0.001737	1	Lautropia	0.002914	1	Proteocatella	0.002372	2	Kineococcus	0.003202	3	Mesoflavibacter	0.003011	3	Methanocorpusculum	0.002269	1	Moorella	0.002424	1	Hydrogenophaga	0.003004	1	Thalassospira	0.003617	1	Haloglycomyces	0.003556	3	0.00065	40	Actinotignum	Halostagnicola
0.001737	1	Candidatus Arthromitus	0.002914	1	Aurantimonas	0.002372	2	Holophaga	0.003202	3	Eudoraea	0.003011	3	Thermoplasma	0.002269	1	Holospora	0.002424	1	Gelidibacter	0.003004	1	Halosimplex	0.003617	1	Paenisporosarcina	0.003556	3	0.000634	39	Methylococcus	Meganema
0.001737	1	Acetomicrobium	0.002914	1	Rubritepida	0.002372	2	Candidatus Magnetobacterium	0.003202	3	Chelativorans	0.003011	3	Methanopyrus	0.002269	1	Salinicoccus	0.002424	1	Acidocella	0.003004	1	Tistrella	0.003617	1	Methermicoccus	0.003556	3	0.000634	39	Caloramator	Sandarakinorhabdus
0.001737	1	Syntrophobotulus	0.002914	1	Acetoanaerobium	0.002372	2	Chromohalobacter	0.003202	3	Mangrovibacter	0.003011	3	Methanohalobium	0.002269	1	Methanoculleus	0.002424	1	Syntrophobotulus	0.003004	1	Thermovibrio	0.003617	1	Perlucidibaca	0.003556	3	0.000634	39	Octadecabacter	Flaviramulus
0.001737	1	Wigglesworthia	0.002914	1	Jannaschia	0.002372	2	Halobacteroides	0.003202	3	Henriciella	0.003011	3	Epulopiscium	0.002269	1	Pseudobutyrivibrio	0.002424	1	Wigglesworthia	0.003004	1	Oceanobacillus	0.003617	1	Phycisphaera	0.003556	3	0.000634	39	Aneurinibacillus	Olivibacter
0.001737	1	Desulfocapsa	0.002914	1	Dorea	0.002372	2	Syntrophus	0.003202	3	Joostella	0.003011	3	Cardiobacterium	0.002269	1	Cenarchaeum	0.002424	1	Salinivibrio	0.003004	1	Varibaculum	0.003617	1	Ilumatobacter	0.003556	3	0.000634	39	Salinibacter	Aciduliprofundum
0.001737	1	Janibacter	0.002914	1	Geoglobus	0.002372	2	Tolumonas	0.003202	3	Candidatus Cloacimonas	0.003011	3	Brochothrix	0.002269	1	Dethiosulfovibrio	0.002424	1	Myxosarcina	0.003004	1	Acetoanaerobium	0.003617	1	Salisaeta	0.003556	3	0.000634	39	Xylanimonas	Terriglobus
0.001737	1	Nakamurella	0.002914	1	Caminibacter	0.002372	2	Johnsonella	0.003202	3	Elioraea	0.003011	3	Acidothermus	0.002269	1	Hydrogenophaga	0.002424	1	Desulfonatronovibrio	0.003004	1	Jannaschia	0.003617	1	Bavariicoccus	0.003556	3	0.000634	39	Pannonibacter	Fulvivirga
0.001737	1	Acidimicrobium	0.002914	1	Pelotomaculum	0.002372	2	Catonella	0.003202	3	Chloracidobacterium	0.003011	3	Lyngbya	0.002269	1	Lautropia	0.002424	1	Desulfospira	0.003004	1	Leisingera	0.003617	1	Caldicoprobacter	0.003556	3	0.000634	39	Thalassobacter	Deefgea
0.001737	1	Thermosphaera	0.002914	1	Tannerella	0.002372	2	Caloramator	0.003202	3	Singulisphaera	0.003011	3	Chelatococcus	0.002269	1	Psychroserpens	0.002424	1	Intrasporangium	0.003004	1	Turicibacter	0.003617	1	Gallaecimonas	0.003556	3	0.000634	39	Odoribacter	Cronobacter
0.001737	1	Chroococcidiopsis	0.002914	1	Terasakiella	0.002372	2	Holospora	0.003202	3	Shimazuella	0.003011	3	Microlunatus	0.002269	1	Acidocella	0.002424	1	Hyperthermus	0.003004	1	Nanoarchaeum	0.003617	1	Marivirga	0.003556	3	0.000634	39	Galbibacter	Caenispirillum
0.001737	1	Planktothrix	0.002914	1	Methanotorris	0.002372	2	Candidatus Arthromitus	0.003202	3	Viridibacillus	0.003011	3	Kinetoplastibacterium	0.002269	1	Tetragenococcus	0.002424	1	Pyrolobus	0.003004	1	Alysiella	0.003617	1	Diplorickettsia	0.003556	3	0.000634	39	Fulvivirga	Tumebacillus
0.001737	1	Leucobacter	0.002914	1	Propionimicrobium	0.002372	2	Tetragenococcus	0.003202	3	Tepidanaerobacter	0.003011	3	Coriobacterium	0.002269	1	Mitsuokella	0.002424	1	Ignicoccus	0.003004	1	Methanotorris	0.003617	1	Celeribacter	0.003556	3	0.000634	39	Enterorhabdus	Robiginitomaculum
0.001737	1	Dehalobacter	0.002914	1	Halomicrobium	0.002372	2	Desulfocapsa	0.003202	3	Glaciibacter	0.003011	3	Agromyces	0.002269	1	Myxosarcina	0.002424	1	Aeropyrum	0.003004	1	Caldisphaera	0.003617	1	Phocaeicola	0.003556	3	0.000634	39	Tomitella	Simiduia
0.001737	1	Thiorhodococcus	0.002914	1	Tepidiphilus	0.002372	2	Marinilabilia	0.003202	3	Syntrophorhabdus	0.003011	3	Acidobacterium	0.002269	1	Nakamurella	0.002424	1	Dermacoccus	0.003004	1	Skermanella	0.003617	1	Solitalea	0.003556	3	0.000634	39	Cesiribacter	Henriciella
0.001737	1	Dermacoccus	0.002914	1	Cobetia	0.002372	2	Sanguibacter	0.003202	3	Sharpea	0.003011	3	Rhodovulum	0.002269	1	Deferribacter	0.002424	1	Marinilabilia	0.003004	1	Gemmobacter	0.003617	1	Granulicella	0.003556	3	0.000634	39	Methyloferula	Thermogladius
0.001737	1	Sagittula	0.002914	1	Skermanella	0.002372	2	Demetria	0.003202	3	Calditerrivibrio	0.003011	3	Riemerella	0.002269	1	Pyrolobus	0.002424	1	Facklamia	0.003004	1	Anaerostipes	0.003617	1	Mobilicoccus	0.003556	3	0.000634	39	Halobacteriovorax	Fangia
0.001737	1	Bergeyella	0.002914	1	Anaerostipes	0.002372	2	Aquamicrobium	0.003202	3	Zhouia	0.003011	3	Methylomicrobium	0.002269	1	Thermosphaera	0.002424	1	Desulfonatronum	0.003004	1	Faecalibacterium	0.003617	1	Fimbriimonas	0.003556	3	0.000634	39	Xanthomarina	Ornithinibacillus
0.001737	1	Marinilabilia	0.002914	1	Oceanithermus	0.002372	2	Orientia	0.003202	3	Aliihoeflea	0.003011	3	Tolumonas	0.002269	1	Chroococcidiopsis	0.002424	1	Psychromonas	0.003004	1	Chamaesiphon	0.003617	1	Candidatus Nitrosoarchaeum	0.003556	3	0.000618	38	Thermoanaerobacter	Viridibacillus
0.001737	1	Desulfobacca	0.002914	1	Sulfurihydrogenibium	0.002372	2	Macrococcus	0.003202	3	Psychrilyobacter	0.003011	3	Polynucleobacter	0.002269	1	Aneurinibacillus	0.002424	1	Terracoccus	0.003004	1	Kordia	0.003617	1	Fortiea	0.003556	3	0.000618	38	Neorickettsia	Calditerrivibrio
0.001737	1	Holdemania	0.002914	1	Enhydrobacter	0.002372	2	Frateuria	0.003202	3	Ruania	0.003011	3	Moorella	0.002269	1	Cylindrospermum	0.002424	1	Aquamicrobium	0.003004	1	Mastigocladopsis	0.003617	1	Candidatus Photodesmus	0.003556	3	0.000618	38	Aeropyrum	Aromatoleum
0.001737	1	Desulfonatronum	0.002914	1	Croceibacter	0.002372	2	Brenneria	0.003202	3	Kosmotoga	0.003011	3	Geothrix	0.002269	1	Aeropyrum	0.002424	1	Cryobacterium	0.003004	1	Alkanindiges	0.003617	1	Chthonomonas	0.003556	3	0.000618	38	Cryobacterium	Butyricimonas
0.001737	1	Aquamicrobium	0.002914	1	Yaniella	0.002372	2	Ferroplasma	0.003202	3	Chelonobacter	0.003011	3	Agrococcus	0.002269	1	Microvirgula	0.002424	1	Macrococcus	0.003004	1	Formosa	0.003617	1	Lonsdalea	0.003556	3	0.000618	38	Eggerthella	Psychrilyobacter
0.001737	1	Macrococcus	0.002914	1	Jeotgalicoccus	0.002372	2	Actinobaculum	0.003202	3	Phycisphaera	0.003011	3	Orenia	0.002269	1	Dermacoccus	0.002424	1	Dechloromonas	0.003004	1	Thermodesulfobium	0.003617	1	Defluviimonas	0.003556	3	0.000618	38	Sodalis	Spongiibacter
0.001737	1	Frateuria	0.002914	1	Saccharibacter	0.002372	2	Cylindrospermopsis	0.003202	3	Bavariicoccus	0.003011	3	Picrophilus	0.002269	1	Kytococcus	0.002424	1	Methylocaldum	0.003004	1	Methanolacinia	0.003617	1	Ponticaulis	0.003556	3	0.000618	38	Limnobacter	Thalassobium
0.001737	1	Brenneria	0.002914	1	Dyella	0.002372	2	Delftia	0.003202	3	Jejuia	0.003011	3	Lautropia	0.002269	1	Sagittula	0.002424	1	Thermobacillus	0.003004	1	Saccharospirillum	0.003617	1	Kyrpidia	0.003556	3	0.000618	38	Shuttleworthia	Indibacter
0.001737	1	Citromicrobium	0.002914	1	Caldilinea	0.002372	2	Anaerovibrio	0.003202	3	Fibrisoma	0.003011	3	Wigglesworthia	0.002269	1	Rickettsiella	0.002424	1	Succinispira	0.003004	1	Mesonia	0.003617	1	Methyloferula	0.003556	3	0.000618	38	Candidatus Jettenia	Solibacillus
0.001737	1	Roseovarius	0.002914	1	Luteibacter	0.002372	2	Thermobifida	0.003202	3	Fibrella	0.003011	3	Salinivibrio	0.002269	1	Desulfobacca	0.002424	1	Chitinophaga	0.003004	1	Hylemonella	0.003617	1	Diplosphaera	0.003556	3	0.000618	38	Gryllotalpicola	Oceanibaculum
0.001737	1	Gracilibacillus	0.002914	1	Hydrocarboniphaga	0.002372	2	Sodalis	0.003202	3	Celeribacter	0.003011	3	Desulfocapsa	0.002269	1	Thiorhodovibrio	0.002424	1	Anaerovibrio	0.003004	1	Luteibacter	0.003617	1	Lachnoanaerobaculum	0.003556	3	0.000618	38	Eggerthia	Methermicoccus
0.001737	1	Thermocrinis	0.002914	1	Gillisia	0.002372	2	Modestobacter	0.003202	3	Rudaea	0.003011	3	Desulfospira	0.002269	1	Natronomonas	0.002424	1	Leminorella	0.003004	1	Anaerotruncus	0.003617	1	Gilliamella	0.003556	3	0.000618	38	Pseudopedobacter	Phycisphaera
0.001737	1	Mannheimia	0.002914	1	Loktanella	0.002372	2	Gluconacetobacter	0.003202	3	Phocaeicola	0.003011	3	Deferribacter	0.002269	1	Carnimonas	0.002424	1	Succinimonas	0.003004	1	Methylohalobius	0.003617	1	Snodgrassella	0.003556	3	0.000601	37	Arhodomonas	Ilumatobacter
0.001737	1	Halothece	0.002914	1	Grimontia	0.002372	2	Asaia	0.003202	3	Fortiea	0.003011	3	Ignicoccus	0.002269	1	Coprothermobacter	0.002424	1	Palaeococcus	0.003004	1	Raphidiopsis	0.003617	1	Gryllotalpicola	0.003556	3	0.000601	37	Agrococcus	Bavariicoccus
0.001737	1	Actinobaculum	0.002914	1	Pseudoclavibacter	0.002372	2	Tenacibaculum	0.003202	3	Nodosilinea	0.003011	3	Marinilabilia	0.002269	1	Terracoccus	0.002424	1	Candidatus Odyssella	0.003004	1	Loktanella	0.003617	1	Gayadomonas	0.003556	3	0.000601	37	Psychroflexus	Cellulosilyticum
0.001737	1	Cylindrospermopsis	0.002914	1	Chlorobaculum	0.002372	2	Halothiobacillus	0.003202	3	Proteiniclasticum	0.003011	3	Halogeometricum	0.002269	1	Orientia	0.002424	1	Allochromatium	0.003004	1	Crocinitomix	0.003617	1	Mariniradius	0.003556	3	0.000601	37	Zobellia	Aliagarivorans
0.001737	1	Succinispira	0.002914	1	Gulosibacter	0.002372	2	Pseudoramibacter	0.003202	3	Austwickia	0.003011	3	Sanguibacter	0.002269	1	Cryobacterium	0.002424	1	Rhodovibrio	0.003004	1	Aestuariibacter	0.003617	1	Nafulsella	0.003556	3	0.000601	37	Halorhabdus	Sulfuricella
0.001737	1	Aminobacterium	0.002914	1	Pseudovibrio	0.002372	2	Denitrovibrio	0.003202	3	Gilliamella	0.003011	3	Demetria	0.002269	1	Macrococcus	0.002424	1	Gluconacetobacter	0.003004	1	Robiginitalea	0.003617	1	Planktomarina	0.003556	3	0.000601	37	Thioflavicoccus	Bhargavaea
0.001737	1	Methylovorus	0.002914	1	Thermosinus	0.002372	2	Chrysiogenes	0.003202	3	Gayadomonas	0.003011	3	Marinospirillum	0.002269	1	Mannheimia	0.002424	1	Tetrasphaera	0.003004	1	Isoptericola	0.003617	1	Fictibacillus	0.003556	3	0.000601	37	Crocinitomix	Fimbriimonas
0.001737	1	Luteimonas	0.002914	1	Trichormus	0.002372	2	Methylocella	0.003202	3	Polycyclovorans	0.003011	3	Brenneria	0.002269	1	Halothece	0.002424	1	Coprobacillus	0.003004	1	Pseudoclavibacter	0.003617	1	Schleiferia	0.003556	3	0.000601	37	Ethanoligenens	Pseudoflavonifractor
0.001737	1	Thermobifida	0.002914	1	Candidatus Cardinium	0.002372	2	Haloterrigena	0.003202	3	Pluralibacter	0.003011	3	Methylocaldum	0.002269	1	Thermobacillus	0.002424	1	Methanomethylovorans	0.003004	1	Chlorobaculum	0.003617	1	Spiribacter	0.003556	3	0.000601	37	Saccharophagus	Candidatus Caldiarchaeum
0.001737	1	Succinimonas	0.002914	1	Hoeflea	0.002372	2	Knoellia	0.003202	3	Shimwellia	0.003011	3	Mycetocola	0.002269	1	Caldivirga	0.002424	1	Anaerovorax	0.003004	1	Parvibaculum	0.003617	1	Luminiphilus	0.003556	3	0.000601	37	Leeia	Candidatus Photodesmus
0.001737	1	Palaeococcus	0.002914	1	Thermincola	0.002372	2	Atopobacter	0.003202	3	Anaerosalibacter	0.003011	3	Luteimonas	0.002269	1	Anaerovibrio	0.002424	1	Leifsonia	0.003004	1	Agarivorans	0.003617	1	Pseudohaliea	0.003556	3	0.000601	37	Hoyosella	Deferrisoma
0.001737	1	Slackia	0.002914	1	Candidatus Amoebophilus	0.002372	2	Thermacetogenium	0.003202	3	Candidatus Methanoperedens	0.003011	3	Palaeococcus	0.002269	1	Buttiauxella	0.002424	1	Alishewanella	0.003004	1	Kangiella	0.003617	1	Candidatus Methanoperedens	0.003556	3	0.000601	37	Kyrpidia	Dongia
0.001737	1	Cryptobacterium	0.002914	1	Citreicella	0.002372	2	Thermomonas	0.003202	3	Aliiglaciecola	0.003011	3	Beutenbergia	0.002269	1	Parachlamydia	0.002424	1	Muricauda	0.003004	1	Salipiger	0.003617	1	Youngiibacter	0.003556	3	0.000601	37	Dongia	Diplosphaera
0.001737	1	Verrucosispora	0.002914	1	Salinimonas	0.002372	2	Methanothermobacter	0.003202	3	Candidatus Omnitrophus	0.003011	3	Mogibacterium	0.002269	1	Psychroflexus	0.002424	1	Zobellia	0.003004	1	Arsenicicoccus	0.003617	1	Methyloglobulus	0.003556	3	0.000601	37	Paeniglutamicibacter	Austwickia
0.001737	1	Oligella	0.002914	1	Avibacterium	0.002372	2	Thermobispora	0.003202	3	Draconibacterium	0.003011	3	Marmoricola	0.002269	1	Succinimonas	0.002424	1	Alkaliphilus	0.003004	1	Owenweeksia	0.003617	1	Actibacterium	0.003556	3	0.000585	36	Mobiluncus	Arcticibacter
0.001737	1	Richelia	0.002914	1	Laceyella	0.002372	2	Xenophilus	0.003202	3	Pseudobacteroides	0.003011	3	Modestobacter	0.002269	1	Succinivibrio	0.002424	1	Denitrovibrio	0.003004	1	Lebetimonas	0.003617	1	Thermophagus	0.003556	3	0.000585	36	Desulfobacterium	Pluralibacter
0.001737	1	Tetrasphaera	0.002914	1	Gramella	0.002372	2	Methanothermococcus	0.003202	3	Mesoaciditoga	0.003011	3	Gluconacetobacter	0.002269	1	Palaeococcus	0.002424	1	Chrysiogenes	0.003004	1	Nitratiruptor	0.003617	1	Candidatus Symbiobacter	0.003556	3	0.000585	36	Methanopyrus	Thermophagus
0.001737	1	Alkalibacterium	0.002914	1	Silanimonas	0.002372	2	Thioflavicoccus	0.003202	3	Thalassotalea	0.003011	3	Tetrasphaera	0.002269	1	Propionispira	0.002424	1	Thermithiobacillus	0.003004	1	Nitratifractor	0.003617	1	Candidatus Stoquefichus	0.003556	3	0.000585	36	Arcanobacterium	Candidatus Atelocyanobacterium
0.001737	1	Coprobacillus	0.002914	1	Desulfitibacter	0.002372	2	Trabulsiella	0.003202	3	Candidatus Paracaedibacter	0.003011	3	Methanomethylovorans	0.002269	1	Eggerthella	0.002424	1	Ferrimicrobium	0.003004	1	Jiangella	0.003617	1	Paenirhodobacter	0.003556	3	0.000585	36	Waddlia	Timonella
0.001737	1	Collinsella	0.002914	1	Proteiniphilum	0.002372	2	Ureibacillus	0.003202	3	Pseudophaeobacter	0.003011	3	Tenacibaculum	0.002269	1	Sodalis	0.002424	1	Haloterrigena	0.003004	1	Candidatus Protochlamydia	0.003617	1	Arenitalea	0.003556	3	0.000585	36	Neptunomonas	Enorma
0.001737	1	Stanieria	0.002914	1	Candidatus Hepatoplasma	0.002372	2	Marinitoga	0.003202	3	Niveispirillum	0.003011	3	Acidilobus	0.002269	1	Verrucosispora	0.002424	1	Pectobacterium	0.003004	1	Citreicella	0.003617	1	Mesoaciditoga	0.003556	3	0.000585	36	Candidatus Odyssella	Pseudobacteroides
0.001737	1	Oscillochloris	0.002914	1	Catellicoccus	0.002372	2	Salinisphaera	0.003202	3	Candidatus Babela	0.003011	3	Halothiobacillus	0.002269	1	Beutenbergia	0.002424	1	Solobacterium	0.003004	1	Salinimonas	0.003617	1	Thermopetrobacter	0.003556	3	0.000585	36	Natronolimnobius	Romboutsia
0.001737	1	Pelistega	0.002914	1	Dinoroseobacter	0.002372	2	Rubritepida	0.003202	3	Saccharicrinis	0.003011	3	Ignatzschineria	0.002269	1	Allochromatium	0.002424	1	Ornithinimicrobium	0.003004	1	Lacinutrix	0.003617	1	Kamptonema	0.003556	3	0.000585	36	Agarivorans	Erysipelatoclostridium
0.001737	1	Tolypothrix	0.002914	1	Saccharophagus	0.002372	2	Varibaculum	0.003202	3	Siccibacter	0.003011	3	Pseudoramibacter	0.002269	1	Asaia	0.002424	1	Syntrophothermus	0.003004	1	Laceyella	0.003617	1	Terrisporobacter	0.003556	3	0.000585	36	Aestuariimicrobium	Thalassotalea
0.001737	1	Pseudoramibacter	0.002914	1	Fluviicola	0.002372	2	Caldithrix	0.003202	3	Thermorudis	0.003011	3	Chrysiogenes	0.002269	1	Pseudaminobacter	0.002424	1	Alkalilimnicola	0.003004	1	Martelella	0.003617	1	Intestinibacter	0.003556	3	0.000585	36	Balneola	Franconibacter
0.001737	1	Candidatus Carsonella	0.002914	1	Thermovirga	0.002372	2	Alysiella	0.003202	3	Actinotignum	0.003011	3	Thermithiobacillus	0.002269	1	Thermicanus	0.002424	1	Lachnobacterium	0.003004	1	Proteiniphilum	0.003617	1	Gottschalkia	0.003556	3	0.000585	36	Smaragdicoccus	Pseudopedobacter
0.001737	1	Alkaliphilus	0.002914	1	Candidatus Sulcia	0.002372	2	Methanotorris	0.003202	3	Levyella	0.003011	3	Haloterrigena	0.002269	1	Richelia	0.002424	1	Methanothermobacter	0.003004	1	Candidatus Hepatoplasma	0.003617	1	Thalassotalea	0.003556	3	0.000585	36	Oceanibaculum	Vermiphilus
0.001737	1	Desulfotignum	0.002914	1	Rhodonellum	0.002372	2	Methanosalsum	0.003202	3	Paeniglutamicibacter	0.003011	3	Ornithinimicrobium	0.002269	1	Methanomethylovorans	0.002424	1	Halorhabdus	0.003004	1	Adhaeribacter	0.003617	1	Neorhizobium	0.003556	3	0.000585	36	Paraoerskovia	Paeniclostridium
0.001737	1	Granulicatella	0.002914	1	Turneriella	0.002372	2	Propionimicrobium	0.003202	3	Paenarthrobacter	0.003011	3	Alkalilimnicola	0.002269	1	Stanieria	0.002424	1	Azovibrio	0.003004	1	Pusillimonas	0.003617	1	Sedimentitalea	0.003556	3	0.000585	36	Desulfocurvus	Xanthomarina
0.001737	1	Denitrovibrio	0.002914	1	Tuberibacillus	0.002372	2	Halomicrobium	0.003202	3	Cutibacterium	0.003011	3	Natronorubrum	0.002269	1	Muricauda	0.002424	1	Blastomonas	0.003004	1	Elizabethkingia	0.003617	1	Phaeodactylibacter	0.003556	3	0.000569	35	Proteus	Parageobacillus
0.001737	1	Thermithiobacillus	0.002914	1	Paucisalibacillus	0.002372	2	Skermanella	0.003202	3	Candidatus Izimaplasma	0.003011	3	Lachnobacterium	0.002269	1	Tolypothrix	0.002424	1	Thermobrachium	0.003004	1	Leadbetterella	0.003617	1	Pararhodospirillum	0.003556	3	0.000569	35	Thermosipho	Haematomicrobium
0.001737	1	Methylocella	0.002914	1	Salimicrobium	0.002372	2	Gemmobacter	0.003202	3	Haematomicrobium	0.003011	3	Ahrensia	0.002269	1	Zobellia	0.002424	1	Desulforegula	0.003004	1	Pontibacter	0.003617	1	Paraglaciecola	0.00237	2	0.000569	35	Caedibacter	Gallionella
0.001737	1	Haloterrigena	0.002914	1	Simplicispira	0.002372	2	Oceanithermus	0.002135	2	Aquaspirillum	0.003011	3	Cedecea	0.002269	1	Pseudoramibacter	0.002424	1	Oceanicaulis	0.003004	1	Halalkalicoccus	0.003617	1	Franconibacter	0.00237	2	0.000569	35	Desulfotalea	Fluoribacter
0.001737	1	Pectobacterium	0.002914	1	Castellaniella	0.002372	2	Micavibrio	0.002135	2	Xanthobacter	0.003011	3	Megamonas	0.002269	1	Ferrimicrobium	0.002424	1	Aequorivita	0.003004	1	Halovivax	0.003617	1	Pseudopedobacter	0.00237	2	0.000569	35	Thermithiobacillus	Eikenella
0.001737	1	Ornithinimicrobium	0.002914	1	Pelagibaca	0.002372	2	Alkanindiges	0.002135	2	Azotobacter	0.003011	3	Ureibacillus	0.002269	1	Pectobacterium	0.002424	1	Thiorhodospira	0.003004	1	Olleya	0.003617	1	Thermorudis	0.00237	2	0.000569	35	Laribacter	Morganella
0.001737	1	Syntrophothermus	0.002914	1	Nonlabens	0.002372	2	Hylemonella	0.002135	2	Methylococcus	0.003011	3	Marinitoga	0.002269	1	Solobacterium	0.002424	1	Gallibacterium	0.003004	1	Candidatus Sulcia	0.003617	1	Actinotignum	0.00237	2	0.000569	35	Hydrogenobaculum	Coxiella
0.001737	1	Geobacillus	0.002914	1	Phycicoccus	0.002372	2	Salinibacterium	0.002135	2	Thermomicrobium	0.003011	3	Vulcanisaeta	0.002269	1	Ornithinimicrobium	0.002424	1	Methanothermococcus	0.003004	1	Nitrosopumilus	0.003617	1	Pseudooceanicola	0.00237	2	0.000569	35	Methanotorris	Ruminobacter
0.001737	1	Carboxydothermus	0.002914	1	Olivibacter	0.002372	2	Luteibacter	0.002135	2	Zymomonas	0.003011	3	Laribacter	0.002269	1	Syntrophothermus	0.002424	1	Thioflavicoccus	0.003004	1	Criblamydia	0.003617	1	Gorillibacterium	0.00237	2	0.000569	35	Raphidiopsis	Nitrobacter
0.001737	1	Alkalilimnicola	0.002914	1	Mariprofundus	0.002372	2	Mucispirillum	0.002135	2	Anaplasma	0.003011	3	Hydrogenobaculum	0.002269	1	Oceanimonas	0.002424	1	Megamonas	0.003004	1	Paludibacter	0.003617	1	Tepidicaulis	0.00237	2	0.000569	35	Gulosibacter	Thiovulum
0.001737	1	Olsenella	0.002914	1	Caldalkalibacillus	0.002372	2	Marvinbryantia	0.002135	2	Acidaminococcus	0.003011	3	Caloranaerobacter	0.002269	1	Limnobacter	0.002424	1	Trabulsiella	0.003004	1	Sedimenticola	0.003617	1	Chania	0.00237	2	0.000569	35	Subdoligranulum	Wolbachia
0.001737	1	Natronorubrum	0.002914	1	Aciduliprofundum	0.002372	2	Caldanaerobacter	0.002135	2	Nitrobacter	0.003011	3	Halosimplex	0.002269	1	Alkalilimnicola	0.002424	1	Marinitoga	0.003004	1	Simplicispira	0.003617	1	Vermiphilus	0.00237	2	0.000569	35	Conchiformibius	Ectothiorhodospira
0.001737	1	Knoellia	0.002914	1	Maribius	0.002372	2	Natronolimnobius	0.002135	2	Wolbachia	0.003011	3	Shuttleworthia	0.002269	1	Atopobacter	0.002424	1	Planomicrobium	0.003004	1	Halostagnicola	0.003617	1	Xanthomarina	0.00237	2	0.000569	35	Nitrosopumilus	Thiocapsa
0.001737	1	Thermomonas	0.002914	1	Uliginosibacterium	0.002372	2	Thermosinus	0.002135	2	Ectothiorhodospira	0.003011	3	Aurantimonas	0.002269	1	Methanothermobacter	0.002424	1	Lentzea	0.003004	1	Pelagibaca	0.003617	1	Parageobacillus	0.00237	2	0.000569	35	Turneriella	Chlorogloeopsis
0.001737	1	Prauserella	0.002914	1	Halalkalibacillus	0.002372	2	Agarivorans	0.002135	2	Chlorogloeopsis	0.003011	3	Rubritepida	0.002269	1	Azovibrio	0.002424	1	Ilyobacter	0.003004	1	Sandarakinorhabdus	0.003617	1	Candidatus Izimaplasma	0.00237	2	0.000569	35	Criblamydia	Piscirickettsia
0.001737	1	Thermobispora	0.002914	1	Aestuariimicrobium	0.002372	2	Algibacter	0.002135	2	Propionibacterium	0.003011	3	Methylocapsa	0.002269	1	Finegoldia	0.002424	1	Laribacter	0.003004	1	Haematobacter	0.003617	1	Halodesulfovibrio	0.00237	2	0.000569	35	Flaviramulus	Micrococcus
0.001737	1	Finegoldia	0.002914	1	Andreprevotia	0.002372	2	Thermobaculum	0.002135	2	Thermomonospora	0.003011	3	Leisingera	0.002269	1	Anaeroarcus	0.002424	1	Caloranaerobacter	0.003004	1	Flaviramulus	0.003617	1	Peptoanaerobacter	0.00237	2	0.000569	35	Tumebacillus	Tropheryma
0.001737	1	Thermobrachium	0.002914	1	Barnesiella	0.002372	2	Trichormus	0.002135	2	Curtobacterium	0.003011	3	Turicibacter	0.002269	1	Kozakia	0.002424	1	Halosimplex	0.003004	1	Haloplanus	0.003617	1	Ochrovirga	0.00237	2	0.000569	35	Hellea	Ureaplasma
0.001737	1	Desulforegula	0.002914	1	Maritimibacter	0.002372	2	Thalassobacter	0.002135	2	Pimelobacter	0.003011	3	Methanosalsum	0.002269	1	Thiorhodospira	0.002424	1	Tistrella	0.003004	1	Mariprofundus	0.003617	1	Hugenholtzia	0.00237	2	0.000569	35	Proteiniclasticum	Methanocorpusculum
0.001737	1	Methanothermococcus	0.002914	1	Candidatus Midichloria	0.002372	2	Owenweeksia	0.002135	2	Sphaerobacter	0.003011	3	Oceanithermus	0.002269	1	Methanothermococcus	0.002424	1	Thermovibrio	0.003004	1	Caldalkalibacillus	-------------------------------------------			0.00237	2	0.000569	35	Thermophagus	Methanomicrobium
0.001737	1	Thioflavicoccus	0.002914	1	Desulfovirgula	0.002372	2	Nitratiruptor	0.002135	2	Tsukamurella	0.003011	3	Enhydrobacter	0.002269	1	Thioflavicoccus	0.002424	1	Cetobacterium	0.003004	1	Aciduliprofundum	0.347247	96	Viruses	0.00237	2	0.000553	34	Leptothrix	Natronobacterium
0.001737	1	Cedecea	0.002914	1	Alloscardovia	0.002372	2	Geopsychrobacter	0.002135	2	Methanospirillum	0.003011	3	Croceibacter	0.002269	1	Trabulsiella	0.002424	1	Rubritepida	0.003004	1	Maribius	6.45663	1785	cannot be assigned to a genus	0.00237	2	0.000553	34	Methylobacter	Methanohalobium
0.001737	1	Planomicrobium	0.002914	1	Humibacter	0.002372	2	Thermincola	0.002135	2	Methanococcoides	0.003011	3	Yaniella	0.002269	1	Ureibacillus	0.002424	1	Smithella	0.003004	1	Uliginosibacterium	-------------------------------------------			0.00237	2	0.000553	34	Desulfobacter	Arhodomonas
0.001737	1	Oerskovia	0.002914	1	Dethiobacter	0.002372	2	Curvibacter	0.002135	2	Thermoproteus	0.003011	3	Formosa	0.002269	1	Marinitoga	0.002424	1	Persephonella	0.003004	1	Methanoregula	78.0041	21565	unclassified	0.00237	2	0.000553	34	Syntrophus	Vagococcus
0.001737	1	Kaistia	0.002914	1	Tumebacillus	0.002372	2	Bizionia	0.002135	2	Heliobacterium	0.003011	3	Saccharibacter	0.002269	1	Vulcanisaeta	0.002424	1	Methylocapsa	0.003004	1	Maritimibacter				0.00237	2	0.000553	34	Deferribacter	Acidothermus
0.001737	1	Hydrogenobaculum	0.002914	1	Granulicoccus	0.002372	2	Thioclava	0.002135	2	Cardiobacterium	0.003011	3	Akkermansia	0.002269	1	Anaerococcus	0.002424	1	Xylanimonas	0.003004	1	Candidatus Midichloria				0.00237	2	0.000553	34	Acidimicrobium	Brachymonas
0.001737	1	Lentibacillus	0.002914	1	Chelativorans	0.002372	2	Alkaliflexus	0.002135	2	Dactylococcopsis	0.003011	3	Luteibacter	0.002269	1	Anaerophaga	0.002424	1	Marinithermus	0.003004	1	Zunongwangia				0.00237	2	0.000553	34	Ureibacillus	Petrotoga
0.001737	1	Anaerophaga	0.002914	1	Mangrovibacter	0.002372	2	Salinimonas	0.002135	2	Anaerobiospirillum	0.003011	3	Hydrocarboniphaga	0.002269	1	Shuttleworthia	0.002424	1	Acetoanaerobium	0.003004	1	Mucilaginibacter				0.00237	2	0.000553	34	Terasakiella	Hydrogenovibrio
0.001737	1	Cetobacterium	0.002914	1	Candidatus Cloacimonas	0.002372	2	Silanimonas	0.002135	2	Brachymonas	0.003011	3	Caldanaerobacter	0.002269	1	Opitutus	0.002424	1	Thalassolituus	0.003004	1	Salsuginibacillus				0.00237	2	0.000553	34	Pseudovibrio	Rhodothermus
0.001737	1	Aurantimonas	0.002914	1	Elioraea	0.002372	2	Shinella	0.002135	2	Arcanobacterium	0.003011	3	Chlorobaculum	0.002269	1	Varibaculum	0.002424	1	Caminibacter	0.003004	1	Humibacter				0.00237	2	0.000553	34	Sneathiella	Coprococcus
0.001737	1	Methylocapsa	0.002914	1	Chloracidobacterium	0.002372	2	Conchiformibius	0.002135	2	Rhodothermus	0.003011	3	Gulosibacter	0.002269	1	Methylocapsa	0.002424	1	Allofustis	0.003004	1	Dethiobacter				0.00237	2	0.000553	34	Lachnoanaerobaculum	Kinetoplastibacterium
0.001737	1	Marinithermus	0.002914	1	Terribacillus	0.002372	2	Rhodonellum	0.002135	2	Kingella	0.003011	3	Agarivorans	0.002269	1	Acetoanaerobium	0.002424	1	Scardovia	0.003004	1	Tumebacillus				0.00237	2	0.000536	33	Halonatronum	Agromyces
0.001737	1	Thalassolituus	0.002914	1	Candidatus Desulforudis	0.002372	2	Desulfovermiculus	0.002135	2	Halothermothrix	0.003011	3	Anaerofustis	0.002269	1	Enterovibrio	0.002424	1	Methanosalsum	0.003004	1	Robiginitomaculum				0.00237	2	0.000536	33	Anaerolinea	Melissococcus
0.001737	1	Jannaschia	0.002914	1	Haliea	0.002372	2	Sedimenticola	0.002135	2	Cycloclasticus	0.003011	3	Serinicoccus	0.002269	1	Geoglobus	0.002424	1	Propionimicrobium	0.003004	1	Adlercreutzia				0.00237	2	0.000536	33	Anaerofustis	Cycloclasticus
0.001737	1	Caminibacter	0.002914	1	Fangia	0.002372	2	Salimicrobium	0.002135	2	Streptobacillus	0.003011	3	Nitratiruptor	0.002269	1	Caminibacter	0.002424	1	Longispora	0.003004	1	Mangrovibacter				0.00237	2	0.000536	33	Ignavibacterium	Dermabacter
0.001737	1	Nanoarchaeum	0.002914	1	Ornithinibacillus	0.002372	2	Halostagnicola	0.002135	2	Nitrococcus	0.003011	3	Nitratifractor	0.002269	1	Pelotomaculum	0.002424	1	Enhydrobacter	0.003004	1	Desulfarculus				0.00237	2	0.000536	33	Candidatus Caldiarchaeum	Sutterella
0.001737	1	Alysiella	0.002914	1	Geminicoccus	0.002372	2	Meganema	0.002135	2	Sutterella	0.003011	3	Candidatus Cardinium	0.002269	1	Allofustis	0.002424	1	Micavibrio	0.003004	1	Saccharibacillus				0.00237	2	0.000536	33	Deferrisoma	Lawsonia
0.001737	1	Terasakiella	0.002914	1	Nosocomiicoccus	0.002372	2	Castellaniella	0.002135	2	Lawsonia	0.003011	3	Winogradskyella	0.002269	1	Terasakiella	0.002424	1	Mastigocladopsis	0.003004	1	Chloracidobacterium				0.00237	2	0.000536	33	Mesotoga	Rubrobacter
0.001737	1	Methanotorris	0.002914	1	Viridibacillus	0.002372	2	Sandarakinorhabdus	0.002135	2	Ammonifex	0.003011	3	Aminiphilus	0.002269	1	Scardovia	0.002424	1	Mesonia	0.003004	1	Terribacillus				0.00237	2	0.000536	33	Polycyclovorans	Ammonifex
0.001737	1	Alicycliphilus	0.002914	1	Candidatus Korarchaeum	0.002372	2	Belnapia	0.002135	2	Polynucleobacter	0.003011	3	Thermosediminibacter	0.002269	1	Methanotorris	0.002424	1	Woodsholea	0.003004	1	Candidatus Korarchaeum				0.00237	2	0.000536	33	Youngiibacter	Tolumonas
0.001737	1	Propionimicrobium	0.002914	1	Glaciibacter	0.002372	2	Caldalkalibacillus	0.002135	2	Caloramator	0.003011	3	Catellicoccus	0.002269	1	Caldisphaera	0.002424	1	Methylohalobius	0.003004	1	Methanolinea				0.00237	2	0.000536	33	Peptoclostridium	Catonella
0.001737	1	Longispora	0.002914	1	Kushneria	0.002372	2	Actinocatenispora	0.002135	2	Orenia	0.003011	3	Dinoroseobacter	0.002269	1	Collimonas	0.002424	1	Loktanella	0.003004	1	Glaciibacter				0.00237	2	0.000536	33	Saccharicrinis	Polynucleobacter
0.001737	1	Skermanella	0.002914	1	Sneathiella	0.002372	2	Halalkalibacillus	0.002135	2	Dethiosulfovibrio	0.003011	3	Sideroxydans	0.002269	1	Candidatus Blochmannia	0.002424	1	Crocinitomix	0.003004	1	Aliivibrio				0.00237	2	0.00052	32	Azotobacter	Abiotrophia
0.001737	1	Parvularcula	0.002914	1	Desulfurispora	0.002372	2	Congregibacter	0.002135	2	Lautropia	0.003011	3	Leadbetterella	0.002269	1	Gemmobacter	0.002424	1	Marvinbryantia	0.003004	1	Amphritea				0.00237	2	0.00052	32	Dialister	Entomoplasma
0.001737	1	Oceanithermus	0.002914	1	Aliivibrio	0.002372	2	Aestuariimicrobium	0.002135	2	Acidocella	0.003011	3	Paludibacter	0.002269	1	Fulvimarina	0.002424	1	Aestuariibacter	0.003004	1	Sharpea				0.00237	2	0.00052	32	Oceanimonas	Mesoplasma
0.001737	1	Croceibacter	0.002914	1	Thalassobaculum	0.002372	2	Candidatus Riesia	0.002135	2	Tetragenococcus	0.003011	3	Paucisalibacillus	0.002269	1	Mastigocladopsis	0.002424	1	Pseudoclavibacter	0.003004	1	Candidatus Aquiluna				0.00237	2	0.00052	32	Eremococcus	Agrococcus
0.001737	1	Fulvimarina	0.002914	1	Zhouia	0.002372	2	Caenispirillum	0.002135	2	Mitsuokella	0.003011	3	Halostagnicola	0.002269	1	Formosa	0.002424	1	Chlorobaculum	0.003004	1	Aromatoleum				0.00237	2	0.00052	32	Aestuariibacter	Orenia
0.001737	1	Kordia	0.002914	1	Pseudogulbenkiania	0.002372	2	Robiginitomaculum	0.002135	2	Desulfospira	0.003011	3	Halalkalibacillus	0.002269	1	Pannonibacter	0.002424	1	Gulosibacter	0.003004	1	Salinimicrobium				0.00237	2	0.00052	32	Parvibaculum	Picrophilus
0.001737	1	Alkanindiges	0.002914	1	Hellea	0.002372	2	Chelativorans	0.002135	2	Acidimicrobium	0.003011	3	Aestuariimicrobium	0.002269	1	Methanolacinia	0.002424	1	Kangiella	0.003004	1	Zhouia				0.00237	2	0.00052	32	Sulfurovum	Dethiosulfovibrio
0.001737	1	Candidatus Glomeribacter	0.002914	1	Paraprevotella	0.002372	2	Mangrovibacter	0.002135	2	Octadecabacter	0.003011	3	Andreprevotia	0.002269	1	Reinekea	0.002424	1	Thermobaculum	0.003004	1	Pseudogulbenkiania				0.00237	2	0.00052	32	Candidatus Cardinium	Acidocella
0.001737	1	Yaniella	0.002914	1	Chitiniphilus	0.002372	2	Henriciella	0.002135	2	Microvirgula	0.003011	3	Salsuginibacillus	0.002269	1	Saccharospirillum	0.002424	1	Blastopirellula	0.003004	1	Paraprevotella				0.00237	2	0.00052	32	Barnesiella	Wigglesworthia
0.001737	1	Salinibacterium	0.002914	1	Robinsoniella	0.002372	2	Joostella	0.002135	2	Rickettsiella	0.003011	3	Robiginitomaculum	0.002269	1	Belliella	0.002424	1	Sulfurovum	0.003004	1	Parasutterella				0.00237	2	0.00052	32	Mucilaginibacter	Mitsuokella
0.001737	1	Pseudorhodobacter	0.002914	1	Smaragdicoccus	0.002372	2	Saccharibacillus	0.002135	2	Empedobacter	0.003011	3	Granulicoccus	0.002269	1	Hylemonella	0.002424	1	Arsenicicoccus	0.003004	1	Enterorhabdus				0.00237	2	0.00052	32	Humibacter	Desulfocapsa
0.001737	1	Akkermansia	0.002914	1	Psychrilyobacter	0.002372	2	Chloracidobacterium	0.002135	2	Marinilabilia	0.003011	3	Rudanella	0.002269	1	Salinibacterium	0.002424	1	Nitratiruptor	0.003004	1	Butyricicoccus				0.00237	2	0.00052	32	Solibacillus	Octadecabacter
0.001737	1	Thermodesulfatator	0.002914	1	Lacticigenium	0.002372	2	Neptuniibacter	0.002135	2	Halogeometricum	0.003011	3	Mangrovibacter	0.002269	1	Candidatus Scalindua	0.002424	1	Atopococcus	0.003004	1	Rubidibacter				0.00237	2	0.00052	32	Candidatus Stoquefichus	Pyrolobus
0.001737	1	Luteibacter	0.002914	1	Kosmotoga	0.002372	2	Shimazuella	0.002135	2	Desulfonatronum	0.003011	3	Desulfarculus	0.002269	1	Pseudorhodobacter	0.002424	1	Candidatus Cardinium	0.003004	1	Chitiniphilus				0.00237	2	0.00052	32	Parageobacillus	Dehalobacter
0.001737	1	Anaerotruncus	0.002914	1	Oceanibaculum	0.002372	2	Fangia	0.002135	2	Terracoccus	0.003011	3	Henriciella	0.002269	1	Akkermansia	0.002424	1	Kordiimonas	0.003004	1	Robinsoniella				0.00237	2	0.000504	31	Pasteurella	Aeropyrum
0.001737	1	Loktanella	0.002914	1	Novispirillum	0.002372	2	Geminicoccus	0.002135	2	Orientia	0.003011	3	Saccharibacillus	0.002269	1	Woodsholea	0.002424	1	Thermosediminibacter	0.003004	1	Smaragdicoccus				0.00237	2	0.000504	31	Anaplasma	Nesterenkonia
0.001737	1	Crocinitomix	0.002914	1	Succinatimonas	0.002372	2	Viridibacillus	0.002135	2	Brenneria	0.003011	3	Chloracidobacterium	0.002269	1	Thermodesulfatator	0.002424	1	Desulfitibacter	0.003004	1	Ruania				0.00237	2	0.000504	31	Erysipelothrix	Bergeyella
0.001737	1	Marvinbryantia	0.002914	1	Fervidicoccus	0.002372	2	Desmospora	0.002135	2	Methylocaldum	0.003011	3	Neptuniibacter	0.002269	1	Loktanella	0.002424	1	Proteiniphilum	0.003004	1	Thalassobium				0.00237	2	0.000504	31	Sphaerobacter	Holdemania
0.001737	1	Aestuariibacter	0.002914	1	Cellulosilyticum	0.002372	2	Sediminibacterium	0.002135	2	Roseovarius	0.003011	3	Segetibacter	0.002269	1	Grimontia	0.002424	1	Chthoniobacter	0.003004	1	Pyramidobacter				0.00237	2	0.000504	31	Desulfomonile	Natronomonas
0.001737	1	Oceanicola	0.002914	1	Jejuia	0.002372	2	Sneathiella	0.002135	2	Ferroplasma	0.003011	3	Candidatus Desulforudis	0.002269	1	Mucispirillum	0.002424	1	Phaeobacter	0.003004	1	Afifella				0.00237	2	0.000504	31	Acidianus	Demetria
0.001737	1	Robiginitalea	0.002914	1	Ignavibacterium	0.002372	2	Amphritea	0.002135	2	Neptunomonas	0.003011	3	Fangia	0.002269	1	Caldanaerobacter	0.002424	1	Prolixibacter	0.003004	1	Kosmotoga				0.00237	2	0.000504	31	Phascolarctobacterium	Marinospirillum
0.001737	1	Maribacter	0.002914	1	Caldanaerobius	0.002372	2	Clostridiisalibacter	0.002135	2	Halothece	0.003011	3	Desmospora	0.002269	1	Robiginitalea	0.002424	1	Saccharophagus	0.003004	1	Haloglycomyces				0.00237	2	0.000504	31	Rahnella	Cryobacterium
0.001737	1	Mahella	0.002914	1	Marivirga	0.002372	2	Calditerrivibrio	0.002135	2	Actinobaculum	0.003011	3	Desulfurispora	0.002269	1	Pseudoclavibacter	0.002424	1	Leadbetterella	0.003004	1	Sediminimonas				0.00237	2	0.000504	31	Microvirgula	Frateuria
0.001737	1	Pseudoclavibacter	0.002914	1	Celeribacter	0.002372	2	Aromatoleum	0.002135	2	Caldivirga	0.003011	3	Sharpea	0.002269	1	Chlorobaculum	0.002424	1	Shinella	0.003004	1	Oceanibaculum				0.00237	2	0.000504	31	Azovibrio	Caldivirga
0.001737	1	Chlorobaculum	0.002914	1	Aliagarivorans	0.002372	2	Paraprevotella	0.002135	2	Budvicia	0.003011	3	Calditerrivibrio	0.002269	1	Pseudovibrio	0.002424	1	Halovivax	0.003004	1	Novispirillum				0.00237	2	0.000504	31	Thermovibrio	Delftia
0.001737	1	Agarivorans	0.002914	1	Bryobacter	0.002372	2	Enterorhabdus	0.002135	2	Palaeococcus	0.003011	3	Amorphus	0.002269	1	Algibacter	0.002424	1	Ignisphaera	0.003004	1	Limnohabitans				0.00237	2	0.000504	31	Caenispirillum	Thermanaerovibrio
0.001737	1	Algibacter	0.002914	1	Granulicella	0.002372	2	Robinsoniella	0.002135	2	Sodalis	0.003011	3	Spongiibacter	0.002269	1	Kangiella	0.002424	1	Goodfellowiella	0.003004	1	Phycisphaera				0.00237	2	0.000504	31	Gallaecimonas	Palaeococcus
0.001737	1	Thermobaculum	0.002914	1	Bhargavaea	0.002372	2	Bermanella	0.002135	2	Verrucosispora	0.003011	3	Succinatimonas	0.002269	1	Sulfurovum	0.002424	1	Rhodonellum	0.003004	1	Geminocystis				0.00237	2	0.000488	30	Methanomicrobium	Eggerthella
0.001737	1	Blastopirellula	0.002914	1	Flavonifractor	0.002372	2	Ruania	0.002135	2	Candidatus Odyssella	0.003011	3	Ilumatobacter	0.002269	1	Owenweeksia	0.002424	1	Nitrosopumilus	0.003004	1	Dehalogenimonas				0.00237	2	0.000488	30	Tolumonas	Sodalis
0.001737	1	Sulfurovum	0.002914	1	Mobilicoccus	0.002372	2	Lacticigenium	0.002135	2	Allochromatium	0.003011	3	Caldicoprobacter	0.002269	1	Lebetimonas	0.002424	1	Turneriella	0.003004	1	Salinarimonas				0.00237	2	0.000488	30	Johnsonella	Rhodovibrio
0.001737	1	Thalassobacter	0.002914	1	Candidatus Caldiarchaeum	0.002372	2	Limnohabitans	0.002135	2	Mogibacterium	0.003011	3	Celeribacter	0.002269	1	Nitratiruptor	0.002424	1	Sedimenticola	0.003004	1	Hoyosella				0.00237	2	0.000488	30	Cylindrospermum	Mogibacterium
0.001737	1	Lebetimonas	0.002914	1	Trueperella	0.002372	2	Ilumatobacter	0.002135	2	Pseudaminobacter	0.003011	3	Mobilicoccus	0.002269	1	Candidatus Amoebophilus	0.002424	1	Simplicispira	0.003004	1	Cellulosilyticum				0.00237	2	0.000488	30	Azospira	Gluconacetobacter
0.001737	1	Nitratiruptor	0.002914	1	Halobellus	0.002372	2	Hoyosella	0.002135	2	Richelia	0.003011	3	Polymorphum	0.002269	1	Curvibacter	0.002424	1	Rubritalea	0.003004	1	Jejuia				0.00237	2	0.000488	30	Anaeroarcus	Asaia
0.001737	1	Nitratifractor	0.002914	1	Candidatus Photodesmus	0.002372	2	Cellulosilyticum	0.002135	2	Chloroherpeton	0.003011	3	Methanomassiliicoccus	0.002269	1	Candidatus Protochlamydia	0.002424	1	Nonlabens	0.003004	1	Halonotius				0.00237	2	0.000488	30	Lebetimonas	Aquabacterium
0.001737	1	Atopococcus	0.002914	1	Nodosilinea	0.002372	2	Halarchaeum	0.002135	2	Coprobacillus	0.003011	3	Nodosilinea	0.002269	1	Leeuwenhoekiella	0.002424	1	Verminephrobacter	0.003004	1	Rudaea				0.00237	2	0.000488	30	Emticicia	Pseudaminobacter
0.001737	1	Candidatus Cardinium	0.002914	1	Catelliglobosispora	0.002372	2	Fibrella	0.002135	2	Stanieria	0.003011	3	Fodinicurvata	0.002269	1	Sulfuricurvum	0.002424	1	Phycicoccus	0.003004	1	Bryobacter				0.00237	2	0.000488	30	Andreprevotia	Stanieria
0.001737	1	Thermincola	0.002914	1	Hamadaea	0.002372	2	Diplorickettsia	0.002135	2	Oscillochloris	0.003011	3	Deferrisoma	0.002269	1	Kordiimonas	0.002424	1	Flaviramulus	0.003004	1	Mobilicoccus				0.00237	2	0.000488	30	Aggregatibacter	Halothiobacillus
0.001737	1	Curvibacter	0.002914	1	Fodinicurvata	0.002372	2	Bryobacter	0.002135	2	Muricauda	0.003011	3	Allokutzneria	0.002269	1	Acaricomes	0.002424	1	Natranaerobius	0.003004	1	Candidatus Caldiarchaeum				0.00237	2	0.000488	30	Segetibacter	Anaerovorax
0.001737	1	Bizionia	0.002914	1	Porticoccus	0.002372	2	Bhargavaea	0.002135	2	Granulicatella	0.003011	3	Proteiniclasticum	0.002269	1	Gramella	0.002424	1	Haloplanus	0.003004	1	Fortiea				0.00237	2	0.000488	30	Haloplasma	Oceanimonas
0.001737	1	Aminiphilus	0.002914	1	Deferrisoma	0.002372	2	Flavonifractor	0.002135	2	Chrysiogenes	0.003011	3	Lachnoanaerobaculum	0.002269	1	Silanimonas	0.002424	1	Galbibacter	0.003004	1	Commensalibacter				0.00237	2	0.000488	30	Halonotius	Carboxydothermus
0.001737	1	Acaricomes	0.002914	1	Cesiribacter	0.002372	2	Mobilicoccus	0.002135	2	Ferrimicrobium	0.003011	3	Imtechella	0.002269	1	Martelella	0.002424	1	Maribius	0.003004	1	Methanomassiliicoccus				0.00237	2	0.000488	30	Sediminispirochaeta	Atopobacter
0.001737	1	Thermosediminibacter	0.002914	1	Methyloferula	0.002372	2	Fimbriimonas	0.002135	2	Syntrophothermus	0.003011	3	Candidatus Methylomirabilis	0.002269	1	Algicola	0.002424	1	Halopiger	0.003004	1	Pelagibacterium				0.00237	2	0.000471	29	Aerococcus	Lachnobacterium
0.001737	1	Proteiniphilum	0.002914	1	Dongia	0.002372	2	Candidatus Caldiarchaeum	0.002135	2	Limnobacter	0.003011	3	Mangrovimonas	0.002269	1	Phaeobacter	0.002424	1	Actinocatenispora	0.003004	1	Kyrpidia				0.00237	2	0.000471	29	Hirschia	Salegentibacter
0.001737	1	Herminiimonas	0.002914	1	Mesotoga	0.002372	2	Fortiea	0.002135	2	Atopobacter	0.003011	3	Spiribacter	0.002269	1	Herminiimonas	0.002424	1	Terriglobus	0.003004	1	Cesiribacter				0.00237	2	0.000471	29	Rathayibacter	Methanothermobacter
0.001737	1	Elizabethkingia	0.002914	1	Gilliamella	0.002372	2	Trueperella	0.002135	2	Thermacetogenium	0.003011	3	Luminiphilus	0.002269	1	Emticicia	0.002424	1	Uliginosibacterium	0.003004	1	Melioribacter				0.00237	2	0.000471	29	Acetivibrio	Salinibacter
0.001737	1	Prolixibacter	0.002914	1	Lysinimicrobium	0.002372	2	Candidatus Photodesmus	0.002135	2	Lachnobacterium	0.003011	3	Coprobacter	0.002269	1	Methylibium	0.002424	1	Congregibacter	0.003004	1	Dongia				0.00237	2	0.000471	29	Salinivibrio	Azovibrio
0.001737	1	Saccharophagus	0.002914	1	Gayadomonas	0.002372	2	Pelagibacterium	0.002135	2	Thermomonas	0.003011	3	Aliiglaciecola	0.002269	1	Leadbetterella	0.002424	1	Andreprevotia	0.003004	1	Austwickia				0.00237	2	0.000471	29	Desulfocapsa	Azospira
0.001737	1	Pontibacter	0.002914	1	Mariniradius	0.002372	2	Catelliglobosispora	0.002135	2	Methanothermobacter	0.003011	3	Actibacterium	0.002269	1	Shinella	0.002424	1	Deefgea	0.003004	1	Gilliamella				0.00237	2	0.000471	29	Empedobacter	Roseibium
0.001737	1	Candidatus Sulcia	0.002914	1	Nafulsella	0.002372	2	Porticoccus	0.002135	2	Azovibrio	0.003011	3	Falsirhodobacter	0.002269	1	Dokdonia	0.002424	1	Maritimibacter	0.003004	1	Mariniradius				0.00237	2	0.000471	29	Desulfobacca	Xenophilus
0.001737	1	Nitrosopumilus	0.002914	1	Salinarchaeum	0.002372	2	Dongia	0.002135	2	Finegoldia	0.003011	3	Draconibacterium	0.002269	1	Conchiformibius	0.002424	1	Cronobacter	0.003004	1	Algiphilus				0.00237	2	0.000471	29	Buttiauxella	Kozakia
0.001737	1	Turneriella	0.002914	1	Arcticibacter	0.002372	2	Imtechella	0.002135	2	Blastomonas	0.003011	3	Arenitalea	0.002269	1	Thermovirga	0.002424	1	Aggregatibacter	0.003004	1	Candidatus Methanomethylophilus				0.00237	2	0.000471	29	Finegoldia	Anaeroglobus
0.001737	1	Paludibacter	0.002914	1	Candidatus Methanomethylophilus	0.002372	2	Austwickia	0.002135	2	Roseibium	0.003011	3	Anditalea	0.002269	1	Rhodonellum	0.002424	1	Desulfovirgula	0.003004	1	Pseudohaliea				0.00237	2	0.000471	29	Pseudoclavibacter	Ureibacillus
0.001737	1	Sedimenticola	0.002914	1	Candidatus Nasuia	0.002372	2	Snodgrassella	0.002135	2	Xenophilus	0.003011	3	Effusibacillus	0.002269	1	Nitrosopumilus	0.002424	1	Stenoxybacter	0.003004	1	Coprobacter				0.00237	2	0.000471	29	Nitratiruptor	Planomicrobium
0.001737	1	Paucisalibacillus	0.002914	1	Kosakonia	0.002372	2	Salinarchaeum	0.002135	2	Kozakia	0.003011	3	Intestinibacter	0.002269	1	Criblamydia	0.002424	1	Salsuginibacillus	0.003004	1	Lutibaculum				0.00237	2	0.000471	29	Candidatus Hepatoplasma	Oerskovia
0.001737	1	Simplicispira	0.002914	1	Candidatus Saccharimonas	0.002372	2	Polycyclovorans	0.002135	2	Thiorhodospira	0.003011	3	Tyzzerella	0.002269	1	Salimicrobium	0.002424	1	Humibacter	0.003004	1	Candidatus Methanoperedens				0.00237	2	0.000471	29	Dethiobacter	Lentzea
0.001737	1	Niastella	0.002914	1	Shimwellia	0.002372	2	Candidatus Hepatobacter	0.002135	2	Magnetococcus	0.003011	3	Candidatus Paracaedibacter	0.002269	1	Halostagnicola	0.002424	1	Mesoflavibacter	0.003004	1	Actibacterium				0.00237	2	0.000471	29	Parvimonas	Citricoccus
0.001737	1	Granulibacter	0.002914	1	Spiribacter	0.002372	2	Arcticibacter	0.002135	2	Oerskovia	0.003011	3	Sedimentitalea	0.002269	1	Meganema	0.002424	1	Adlercreutzia	0.003004	1	Falsirhodobacter				0.00237	2	0.000471	29	Defluviimonas	Cetobacterium
0.001737	1	Phycicoccus	0.002914	1	Noviherbaspirillum	0.002372	2	Phaseolibacter	0.002135	2	Kaistia	0.003011	3	Halapricum	0.002269	1	Methylotenera	0.002424	1	Simiduia	0.003004	1	Thermophagus				0.00237	2	0.000471	29	Intestinibacter	Varibaculum
0.001737	1	Flaviramulus	0.002914	1	Lutibaculum	0.002372	2	Pluralibacter	0.002135	2	Salinispora	0.003011	3	Candidatus Babela	0.002269	1	Pelagibaca	0.002424	1	Granulicoccus	0.003004	1	Candidatus Symbiobacter				0.00237	2	0.000471	29	Pseudothermotoga	Nautilia
0.001737	1	Olivibacter	0.002914	1	Intestinimonas	0.002372	2	Schleiferia	0.002135	2	Halosimplex	0.003011	3	Faecalitalea	0.002269	1	Verminephrobacter	0.002424	1	Chelativorans	0.003004	1	Timonella				0.00237	2	0.000471	29	Rubinisphaera	Caminibacter
0.001737	1	Caldalkalibacillus	0.002914	1	Fervidicella	0.002372	2	Shimwellia	0.002135	2	Thermovibrio	0.003011	3	Thermorudis	0.002269	1	Granulibacter	0.002424	1	Henriciella	0.003004	1	Candidatus Stoquefichus				0.00237	2	0.000455	28	Methylophilus	Turicibacter
0.001737	1	Aciduliprofundum	0.002914	1	Aliiglaciecola	0.002372	2	Coprobacter	0.002135	2	Lentibacillus	0.003011	3	Euryhalocaulis	0.002269	1	Haloplanus	0.002424	1	Joostella	0.003004	1	Draconibacterium				0.00237	2	0.000455	28	Salmonella	Pelotomaculum
0.001737	1	Niabella	0.002914	1	Youngiibacter	0.002372	2	Lutibaculum	0.002135	2	Cetobacterium	0.003011	3	Tepidicaulis	0.002269	1	Olivibacter	0.002424	1	Candidatus Cloacimonas	0.003004	1	Basilea				0.00237	2	0.000455	28	Wolbachia	Tannerella
0.001737	1	Uliginosibacterium	0.002914	1	Methyloglobulus	0.002372	2	Methyloglobulus	0.002135	2	Salinisphaera	0.003011	3	Paeniglutamicibacter	0.002269	1	Caldalkalibacillus	0.002424	1	Haloplasma	0.003004	1	Kallipyga				0.00237	2	0.000455	28	Alysiella	Methanotorris
0.001737	1	Halalkalibacillus	0.002914	1	Candidatus Latescibacter	0.002372	2	Candidatus Omnitrophus	0.002135	2	Acetoanaerobium	0.003011	3	Chania	0.002269	1	Maribius	0.002424	1	Methanosphaerula	0.003004	1	Senegalimassilia				0.00237	2	0.000455	28	Desulfatibacillum	Methanosalsum
0.001737	1	Congregibacter	0.002914	1	Candidatus Microgenomatus	0.002372	2	Komagataeibacter	0.002135	2	Geoglobus	0.003011	3	Paraclostridium	0.002269	1	Terriglobus	0.002424	1	Nosocomiicoccus	0.003004	1	Arenitalea				0.00237	2	0.000455	28	Robiginitalea	Alicycliphilus
0.001737	1	Fulvivirga	0.002914	1	Actibacterium	0.002372	2	Thermoanaerobaculum	0.002135	2	Leisingera	0.003011	3	Hugenholtzia	0.002269	1	Andreprevotia	0.002424	1	Viridibacillus	0.003004	1	Peptoclostridium				0.00237	2	0.000455	28	Paucisalibacillus	Kineosphaera
0.001737	1	Barnesiella	0.002914	1	Falsirhodobacter	0.002372	2	Timonella	0.002135	2	Methanotorris	0.002007	2	Vitreoscilla	0.002269	1	Barnesiella	0.002424	1	Candidatus Korarchaeum	0.003004	1	Anditalea				0.00237	2	0.000455	28	Verminephrobacter	Enhydrobacter
0.001737	1	Candidatus Midichloria	0.002914	1	Komagataeibacter	0.002372	2	Kallipyga	0.002135	2	Methanosalsum	0.002007	2	Leptothrix	0.002269	1	Maritimibacter	0.002424	1	Sediminibacterium	0.003004	1	Romboutsia				0.00237	2	0.000455	28	Oceaniovalibus	Croceibacter
0.001737	1	Cronobacter	0.002914	1	Thermophagus	0.002372	2	Mesoaciditoga	0.002135	2	Propionimicrobium	0.002007	2	Brucella	0.002269	1	Candidatus Midichloria	0.002424	1	Desulfurispora	0.003004	1	Kamptonema				0.00237	2	0.000455	28	Kosakonia	Faecalibacterium
0.001737	1	Aggregatibacter	0.002914	1	Paenirhodobacter	0.002372	2	Romboutsia	0.002135	2	Longispora	0.002007	2	Hafnia	0.002269	1	Cronobacter	0.002424	1	Aliivibrio	0.003004	1	Effusibacillus				0.00237	2	0.000439	27	Arsenophonus	Yaniella
0.001737	1	Alloscardovia	0.002914	1	Basilea	0.002372	2	Effusibacillus	0.002135	2	Gemmobacter	0.002007	2	Kluyvera	0.002269	1	Caenispirillum	0.002424	1	Parvimonas	0.003004	1	Chitinivibrio				0.00237	2	0.000439	27	Coprococcus	Methanolacinia
0.001737	1	Desulfurivibrio	0.002914	1	Kallipyga	0.002372	2	Intestinibacter	0.002135	2	Enhydrobacter	0.002007	2	Morganella	0.002269	1	Desulfovirgula	0.002424	1	Calditerrivibrio	0.003004	1	Terrisporobacter				0.00237	2	0.000439	27	Dermacoccus	Belliella
0.001737	1	Jonquetella	0.002914	1	Pseudobacteroides	0.002372	2	Gottschalkia	0.002135	2	Micavibrio	0.002007	2	Arsenophonus	0.002269	1	Alloscardovia	0.002424	1	Haloferula	0.003004	1	Neorhizobium				0.00237	2	0.000439	27	Bergeyella	Salinibacterium
0.001737	1	Tumebacillus	0.002914	1	Anditalea	0.002372	2	Thalassotalea	0.002135	2	Desulfatibacillum	0.002007	2	Oxalobacter	0.002269	1	Stenoxybacter	0.002424	1	Amorphus	0.003004	1	Altibacter				0.00237	2	0.000439	27	Propionispira	Luteibacter
0.001737	1	Robiginitomaculum	0.002914	1	Mesoaciditoga	0.002372	2	Altibacter	0.002135	2	Methanolacinia	0.002007	2	Weeksella	0.002269	1	Tumebacillus	0.002424	1	Wohlfahrtiimonas	0.003004	1	Sedimentitalea				0.00237	2	0.000439	27	Laceyella	Caldanaerobacter
0.001737	1	Reyranella	0.002914	1	Effusibacillus	0.002372	2	Faecalitalea	0.002135	2	Woodsholea	0.002007	2	Prosthecochloris	0.002269	1	Granulicoccus	0.002424	1	Rubidibacter	0.003004	1	Pseudothermotoga				0.00237	2	0.000439	27	Granulicoccus	Robiginitalea
0.001737	1	Simiduia	0.002914	1	Terrisporobacter	0.002372	2	Franconibacter	0.002135	2	Luteibacter	0.002007	2	Marinococcus	0.002269	1	Chelativorans	0.002424	1	Psychrilyobacter	0.003004	1	Franconibacter				0.00237	2	0.000439	27	Indibacter	Gulosibacter
0.001737	1	Granulicoccus	0.002914	1	Thalassotalea	0.002372	2	Euryhalocaulis	0.002135	2	Mucispirillum	0.002007	2	Renibacterium	0.002269	1	Rudanella	0.002424	1	Lacticigenium	0.003004	1	Siccibacter				0.00237	2	0.000439	27	Wenxinia	Thermobaculum
0.001737	1	Mangrovibacter	0.002914	1	Niveispirillum	0.002372	2	Tepidicaulis	0.002135	2	Anaerofustis	0.002007	2	Propionibacterium	0.002269	1	Henriciella	0.002424	1	Afifella	0.003004	1	Hungatella				0.00237	2	0.000439	27	Methyloglobulus	Owenweeksia
0.001737	1	Desulfarculus	0.002914	1	Faecalitalea	0.002372	2	Glutamicibacter	0.002135	2	Candidatus Amoebophilus	0.002007	2	Tropheryma	0.002269	1	Kiloniella	0.002424	1	Gracilimonas	0.003004	1	Thermorudis				0.00237	2	0.000439	27	Sedimentitalea	Candidatus Cardinium
0.001737	1	Henriciella	0.002914	1	Asinibacterium	0.002372	2	Pseudarthrobacter	0.002135	2	Candidatus Protochlamydia	0.002007	2	Pimelobacter	0.002269	1	Balneola	0.002424	1	Kosmotoga	0.003004	1	Oleiagrimonas				0.00237	2	0.000439	27	Hugenholtzia	Thermincola
0.001737	1	Candidatus Cloacimonas	0.002914	1	Saccharicrinis	0.002372	2	Vermiphilus	0.002135	2	Winogradskyella	0.002007	2	Sphaerobacter	0.002269	1	Neptuniibacter	0.002424	1	Paenisporosarcina	0.003004	1	Halobacteriovorax				0.00237	2	0.000423	26	Peptostreptococcus	Citreicella
0.001737	1	Shimazuella	0.002914	1	Mageeibacillus	0.002372	2	Candidatus Nitrosotenuis	0.002135	2	Acaricomes	0.002007	2	Tsukamurella	0.002269	1	Haloplasma	0.002424	1	Oceanibaculum	0.003004	1	Paenarthrobacter				0.00237	2	0.000423	26	Rhodoferax	Bizionia
0.001737	1	Bibersteinia	0.002914	1	Caldisalinibacter	0.002372	2	Paraclostridium	0.002135	2	Thermosediminibacter	0.002007	2	Methanospirillum	0.002269	1	Candidatus Desulforudis	0.002424	1	Novispirillum	0.003004	1	Pseudarthrobacter				0.00237	2	0.000423	26	Riemerella	Alkaliflexus
0.001737	1	Thermogladius	0.002914	1	Siccibacter	0.002372	2	Pseudorhizobium	0.002135	2	Subdoligranulum	0.002007	2	Methanococcoides	0.002269	1	Desulfonatronospira	0.002424	1	Paraoerskovia	0.003004	1	Chania				0.00237	2	0.000423	26	Oenococcus	Lacinutrix
0.001737	1	Ornithinibacillus	0.002914	1	Hungatella	0.002372	2	Acidipropionibacterium	0.002135	2	Proteiniphilum	0.002007	2	Thermofilum	0.002269	1	Candidatus Korarchaeum	0.002424	1	Limnohabitans	0.003004	1	Vermiphilus				0.00237	2	0.000423	26	Picrophilus	Subdoligranulum
0.001737	1	Desulfonatronospira	0.002914	1	Thermorudis	0.002372	2	Cutibacterium	0.002135	2	Algicola	0.002007	2	Desulfurococcus	0.002269	1	Tepidanaerobacter	0.002424	1	Phycisphaera	0.003004	1	Xanthomarina				0.00237	2	0.000423	26	Marichromatium	Pusillimonas
0.001737	1	Viridibacillus	0.002914	1	Halobacteriovorax	0.001186	1	Leptothrix	0.002135	2	Sideroxydans	0.002007	2	Desulfosarcina	0.002269	1	Desmospora	0.002424	1	Ilumatobacter	0.003004	1	Clostridioides				0.00237	2	0.000423	26	Allobaculum	Dinoroseobacter
0.001737	1	Methanolinea	0.002914	1	Paenarthrobacter	0.001186	1	Aquaspirillum	0.002135	2	Pontibacter	0.002007	2	Heliobacterium	0.002269	1	Dasania	0.002424	1	Salinarimonas	0.003004	1	Atlantibacter				0.00237	2	0.000423	26	Alicycliphilus	Emticicia
0.001737	1	Desmospora	0.002914	1	Pseudarthrobacter	0.001186	1	Methylobacillus	0.002135	2	Olleya	0.002007	2	Dactylococcopsis	0.002269	1	Desulfurispora	0.002424	1	Caldisericum	0.003004	1	Pseudorhizobium				0.00237	2	0.000423	26	Kordia	Leadbetterella
0.001737	1	Glaciibacter	0.002914	1	Paraclostridium	0.001186	1	Fluoribacter	0.002135	2	Sedimenticola	0.002007	2	Lachnospira	0.002269	1	Syntrophorhabdus	0.002424	1	Desulfocurvus	0.003004	1	Sediminispirochaeta				0.00237	2	0.000423	26	Belliella	Shinella
0.001737	1	Kushneria	0.002914	1	Pseudorhizobium	0.001186	1	Moraxella	0.002135	2	Rubritalea	0.002007	2	Ornithobacterium	0.002269	1	Amphritea	0.002424	1	Caldicoprobacter	0.003004	1	Candidatus Izimaplasma				0.00237	2	0.000423	26	Salinibacterium	Conchiformibius
0.001737	1	Sediminibacterium	0.002914	1	Parageobacillus	0.001186	1	Thermomicrobium	0.002135	2	Sandarakinorhabdus	0.002007	2	Arcanobacterium	0.002269	1	Candidatus Aquiluna	0.002424	1	Tomitella	0.003004	1	Peptoanaerobacter				0.00237	2	0.000423	26	Silanimonas	Thermovirga
0.001737	1	Parasutterella	0.002914	1	Sediminispirochaeta	0.001186	1	Hafnia	0.002135	2	Verminephrobacter	0.002007	2	Caedibacter	0.002269	1	Parvimonas	0.002424	1	Gallaecimonas	0.003004	1	Ochrovirga				0.00237	2	0.000423	26	Algicola	Candidatus Sulcia
0.001737	1	Wohlfahrtiimonas	0.002914	1	Acidipropionibacterium	0.001186	1	Kluyvera	0.002135	2	Uliginosibacterium	0.002007	2	Desulfurella	0.002269	1	Calditerrivibrio	0.002424	1	Ignavibacterium	0.003004	1	Bernardetia				0.00237	2	0.000423	26	Rhodonellum	Rhodonellum
0.001737	1	Rubidibacter	0.002914	1	Halodesulfovibrio	0.001186	1	Nitrobacter	0.002135	2	Halalkalibacillus	0.002007	2	Melissococcus	0.002269	1	Sciscionella	0.002424	1	Fibrisoma	0.003004	1	Hugenholtzia				0.00237	2	0.000423	26	Sedimenticola	Desulfovermiculus
0.001737	1	Ruania	0.002914	1	Peptoanaerobacter	0.001186	1	Hydrogenobacter	0.002135	2	Desulfurispirillum	0.002007	2	Cycloclasticus	0.002269	1	Smaragdicoccus	0.002424	1	Fibrella	0.003004	1	Rodentibacter				0.00237	2	0.000423	26	Simplicispira	Rubritalea
0.001737	1	Thalassobium	0.002914	1	Ochrovirga	0.001186	1	Wolbachia	0.002135	2	Congregibacter	0.002007	2	Sutterella	0.002269	1	Ruania	0.002424	1	Celeribacter	-------------------------------------------						0.00237	2	0.000423	26	Alloscardovia	Patulibacter
0.001737	1	Indibacter	0.002914	1	Haematomicrobium	0.001186	1	Thiocapsa	0.002135	2	Maritimibacter	0.002007	2	Ewingella	0.002269	1	Solibacillus	0.002424	1	Candidatus Zinderia	0.438623	146	Viruses				0.00237	2	0.000423	26	Bibersteinia	Verminephrobacter
0.001737	1	Solibacillus	0.002914	1	Candidatus Vecturithrix	0.001186	1	Rhodomicrobium	0.002135	2	Cronobacter	0.002007	2	Chromohalobacter	0.002269	1	Gracilimonas	0.002424	1	Sulfuricella	7.77804	2589	cannot be assigned to a genus				0.00237	2	0.000423	26	Maritalea	Granulibacter
0.001737	1	Gracilimonas	0.002914	1	Pacificimonas	0.001186	1	Micrococcus	0.002135	2	Desulfovirgula	0.002007	2	Ammonifex	0.002269	1	Leeia	0.002424	1	Bhargavaea	-------------------------------------------						0.00237	2	0.000423	26	Methermicoccus	Natranaerobius
0.001737	1	Kosmotoga	-------------------------------------------			0.001186	1	Aerococcus	0.002135	2	Jonquetella	0.002007	2	Promicromonospora	0.002269	1	Chelonobacter	0.002424	1	Mobilicoccus	68.0556	22653	unclassified				0.00237	2	0.000423	26	Commensalibacter	Caldalkalibacillus
0.001737	1	Haloglycomyces	0.399219	137	Viruses	0.001186	1	Renibacterium	0.002135	2	Tumebacillus	0.002007	2	Filifactor	0.002269	1	Perlucidibaca	0.002424	1	Fortiea							0.00237	2	0.000423	26	Candidatus Nasuia	Galbibacter
0.001737	1	Wenxinia	6.50698	2233	cannot be assigned to a genus	0.001186	1	Alloiococcus	0.002135	2	Robiginitomaculum	0.002007	2	Desulfohalobium	0.002269	1	Paraoerskovia	0.002424	1	Halobellus							0.00237	2	0.000406	25	Cycloclasticus	Sediminibacter
0.001737	1	Methermicoccus	-------------------------------------------			0.001186	1	Curtobacterium	0.002135	2	Simiduia	0.002007	2	Methanoculleus	0.002269	1	Ilumatobacter	0.002424	1	Candidatus Photodesmus							0.00237	2	0.000406	25	Tetragenococcus	Maribius
0.001737	1	Perlucidibaca	76.6267	26296	unclassified	0.001186	1	Methanothermus	0.002135	2	Candidatus Desulforudis	0.002007	2	Abiotrophia	0.002269	1	Fervidicoccus	0.002424	1	Pelagibacterium							0.00237	2	0.000406	25	Methylocaldum	Uliginosibacterium
0.001737	1	Salisaeta				0.001186	1	Methanomicrobium	0.002135	2	Haliea	0.002007	2	Geovibrio	0.002269	1	Bavariicoccus	0.002424	1	Nodosilinea							0.00237	2	0.000406	25	Succinispira	Congregibacter
0.001737	1	Salinarimonas				0.001186	1	Halobacterium	0.002135	2	Bibersteinia	0.002007	2	Dethiosulfovibrio	0.002269	1	Cellulosilyticum	0.002424	1	Ponticaulis							0.00237	2	0.000406	25	Muricauda	Aestuariimicrobium
0.001737	1	Caldisericum				0.001186	1	Methanosphaera	0.002135	2	Thermogladius	0.002007	2	Hydrogenophaga	0.002269	1	Caldicoprobacter	0.002424	1	Deferrisoma							0.00237	2	0.000406	25	Ignatzschineria	Barnesiella
0.001737	1	Halogranum				0.001186	1	Methanohalobium	0.002135	2	Fangia	0.002007	2	Acidocella	0.002269	1	Candidatus Puniceispirillum	0.002424	1	Kyrpidia							0.00237	2	0.000406	25	Fangia	Aggregatibacter
0.001737	1	Desulfocurvus				0.001186	1	Flexistipes	0.002135	2	Desulfonatronospira	0.002007	2	Syntrophobotulus	0.002269	1	Candidatus Zinderia	0.002424	1	Methyloferula							0.00237	2	0.000406	25	Celeribacter	Elusimicrobium
0.001737	1	Tomitella				0.001186	1	Acetonema	0.002135	2	Candidatus Korarchaeum	0.002007	2	Mitsuokella	0.002269	1	Phocaeicola	0.002424	1	Dongia							0.00237	2	0.000406	25	Fortiea	Adlercreutzia
0.001737	1	Gallaecimonas				0.001186	1	Epulopiscium	0.002135	2	Desmospora	0.002007	2	Xenococcus	0.002269	1	Solitalea	0.002424	1	Diplosphaera							0.00237	2	0.000406	25	Imtechella	Elioraea
0.001737	1	Fibrella				0.001186	1	Cardiobacterium	0.002135	2	Kushneria	0.002007	2	Janibacter	0.002269	1	Bhargavaea	0.002424	1	Candidatus Methylomirabilis							0.00237	2	0.000406	25	Neorhizobium	Chloracidobacterium
0.001737	1	Caldanaerobius				0.001186	1	Symbiobacterium	0.002135	2	Clostridiisalibacter	0.002007	2	Acidimicrobium	0.002269	1	Methanomassiliicoccus	0.002424	1	Mesotoga							0.00237	2	0.00039	24	Staphylothermus	Terribacillus
0.001737	1	Halonotius				0.001186	1	Brochothrix	0.002135	2	Thalassobaculum	0.002007	2	Hyperthermus	0.002269	1	Pelagibacterium	0.002424	1	Austwickia							0.00237	2	0.00039	24	Kinetoplastibacterium	Segetibacter
0.001737	1	Candidatus Zinderia				0.001186	1	Anaerobiospirillum	0.002135	2	Candidatus Regiella	0.002007	2	Microvirgula	0.002269	1	Catelliglobosispora	0.002424	1	Mangrovimonas							0.00237	2	0.00039	24	Wigglesworthia	Shimazuella
0.001737	1	Rudaea				0.001186	1	Petrotoga	0.002135	2	Butyricicoccus	0.002007	2	Dermacoccus	0.002269	1	Porticoccus	0.002424	1	Candidatus Endolissoclinum							0.00237	2	0.00039	24	Anaerovibrio	Methanosphaerula
0.001737	1	Bryobacter				0.001186	1	Ornithobacterium	0.002135	2	Chitiniphilus	0.002007	2	Sagittula	0.002269	1	Deferrisoma	0.002424	1	Candidatus Hepatobacter							0.00237	2	0.00039	24	Allochromatium	Haliea
0.001737	1	Flavonifractor				0.001186	1	Taylorella	0.002135	2	Bermanella	0.002007	2	Empedobacter	0.002269	1	Kyrpidia	0.002424	1	Eggerthia							0.00237	2	0.00039	24	Solobacterium	Bibersteinia
0.001737	1	Litoreibacter				0.001186	1	Rothia	0.002135	2	Smaragdicoccus	0.002007	2	Desulfobacca	0.002269	1	Dongia	0.002424	1	Candidatus Nasuia							0.00237	2	0.00039	24	Marinitoga	Desulfonatronospira
0.001737	1	Candidatus Moranella				0.001186	1	Coriobacterium	0.002135	2	Maritalea	0.002007	2	Natronomonas	0.002269	1	Imtechella	0.002424	1	Fictibacillus							0.00237	2	0.00039	24	Thermobaculum	Desmospora
0.001737	1	Fortiea				0.001186	1	Agromyces	0.002135	2	Afifella	0.002007	2	Desulfonatronum	0.002269	1	Mesotoga	0.002424	1	Candidatus Saccharimonas							0.00237	2	0.00039	24	Thermincola	Glaciibacter
0.001737	1	Trueperella				0.001186	1	Melissococcus	0.002135	2	Solibacillus	0.002007	2	Terracoccus	0.002269	1	Gryllotalpicola	0.002424	1	Luminiphilus							0.00237	2	0.00039	24	Ignisphaera	Clostridiisalibacter
0.001737	1	Lonsdalea				0.001186	1	Neorickettsia	0.002135	2	Haloglycomyces	0.002007	2	Orientia	0.002269	1	Mangrovimonas	0.002424	1	Pseudohaliea							0.00237	2	0.00039	24	Limnohabitans	Salinimicrobium
0.001737	1	Defluviimonas				0.001186	1	Rhodovulum	0.002135	2	Novispirillum	0.002007	2	Macrococcus	0.002269	1	Gayadomonas	0.002424	1	Candidatus Profftella							0.00237	2	0.00039	24	Caldanaerobius	Zhouia
0.001737	1	Ponticaulis				0.001186	1	Streptobacillus	0.002135	2	Limnohabitans	0.002007	2	Thermobacillus	0.002269	1	Mariniradius	0.002424	1	Fervidicella							0.00237	2	0.00039	24	Fervidicella	Candidatus Regiella
0.001737	1	Allokutzneria				0.001186	1	Dermabacter	0.002135	2	Caldisericum	0.002007	2	Anaerovibrio	0.002269	1	Candidatus Methanomethylophilus	0.002424	1	Aliiglaciecola							0.00237	2	0.00039	24	Paenarthrobacter	Bermanella
0.001737	1	Methyloferula				0.001186	1	Methylomicrobium	0.002135	2	Hoyosella	0.002007	2	Buttiauxella	0.002269	1	Phaseolibacter	0.002424	1	Youngiibacter							0.00237	2	0.000374	23	Flectobacillus	Afifella
0.001737	1	Dongia				0.001186	1	Oligotropha	0.002135	2	Basfia	0.002007	2	Sodalis	0.002269	1	Candidatus Nasuia	0.002424	1	Methyloglobulus							0.00237	2	0.000374	23	Desulfomicrobium	Gracilimonas
0.001737	1	Diplosphaera				0.001186	1	Ewingella	0.002135	2	Caldicoprobacter	0.002007	2	Verrucosispora	0.002269	1	Pluralibacter	0.002424	1	Candidatus Omnitrophus							0.00237	2	0.000374	23	Acetonema	Kosmotoga
0.001737	1	Imtechella				0.001186	1	Lawsonia	0.002135	2	Halarchaeum	0.002007	2	Candidatus Odyssella	0.002269	1	Shimwellia	0.002424	1	Thermoanaerobaculum							0.00237	2	0.000374	23	Heliobacterium	Candidatus Koribacter
0.001737	1	Candidatus Methylomirabilis				0.001186	1	Rubrobacter	0.002135	2	Gallaecimonas	0.002007	2	Pseudaminobacter	0.002269	1	Anaerosalibacter	0.002424	1	Timonella							0.00237	2	0.000374	23	Thermonema	Salinarimonas
0.001737	1	Mangrovimonas				0.001186	1	Ammonifex	0.002135	2	Caldanaerobius	0.002007	2	Richelia	0.002269	1	Candidatus Methanoperedens	0.002424	1	Candidatus Stoquefichus							0.00237	2	0.000374	23	Lawsonia	Halarchaeum
0.001737	1	Nafulsella				0.001186	1	Desulfohalobium	0.002135	2	Halonotius	0.002007	2	Pelistega	0.002269	1	Youngiibacter	0.002424	1	Paenirhodobacter							0.00237	2	0.000374	23	Ammonifex	Halonotius
0.001737	1	Algiphilus				0.001186	1	Methanoculleus	0.002135	2	Bhargavaea	0.002007	2	Desulfotignum	0.002269	1	Candidatus Halobonum	0.002424	1	Draconibacterium							0.00237	2	0.000374	23	Orenia	Rudaea
0.001737	1	Candidatus Hepatobacter				0.001186	1	Abiotrophia	0.002135	2	Candidatus Caldiarchaeum	0.002007	2	Methylocella	0.002269	1	Komagataeibacter	0.002424	1	Pseudobacteroides							0.00237	2	0.000374	23	Rickettsiella	Gilvimarinus
0.001737	1	Kandleria				0.001186	1	Entomoplasma	0.002135	2	Candidatus Photodesmus	0.002007	2	Solobacterium	0.002269	1	Thermoanaerobaculum	0.002424	1	Kamptonema							0.00237	2	0.000374	23	Succinimonas	Flavonifractor
0.001737	1	Phaseolibacter				0.001186	1	Agrococcus	0.002135	2	Chthonomonas	0.002007	2	Oceanimonas	0.002269	1	Ferriphaselus	0.002424	1	Chitinivibrio							0.00237	2	0.000374	23	Turicella	Candidatus Nitrosoarchaeum
0.001737	1	Shimwellia				0.001186	1	Cenarchaeum	0.002135	2	Lonsdalea	0.002007	2	Olsenella	0.002269	1	Timonella	0.002424	1	Gottschalkia							0.00237	2	0.000374	23	Thermobrachium	Pelagibacterium
0.001737	1	Spiribacter				0.001186	1	Dethiosulfovibrio	0.002135	2	Pelagibacterium	0.002007	2	Atopobacter	0.002269	1	Basilea	0.002424	1	Candidatus Paracaedibacter							0.00237	2	0.000374	23	Thermodesulfobium	Ponticaulis
0.001737	1	Youngiibacter				0.001186	1	Hydrogenophaga	0.002135	2	Allokutzneria	0.002007	2	Thermacetogenium	0.002269	1	Enorma	0.002424	1	Neorhizobium							0.00237	2	0.000374	23	Algibacter	Kyrpidia
0.001737	1	Methyloglobulus				0.001186	1	Lautropia	0.002135	2	Methyloferula	0.002007	2	Prauserella	0.002269	1	Arenitalea	0.002424	1	Altibacter							0.00237	2	0.000374	23	Salinimonas	Methyloferula
0.001737	1	Candidatus Omnitrophus				0.001186	1	Acetomicrobium	0.002135	2	Lachnoanaerobaculum	0.002007	2	Methanothermobacter	0.002269	1	Pseudobacteroides	0.002424	1	Holdemanella							0.00237	2	0.000374	23	Leadbetterella	Imtechella
0.001737	1	Candidatus Latescibacter				0.001186	1	Salinivibrio	0.002135	2	Mangrovimonas	0.002007	2	Azovibrio	0.002269	1	Anditalea	0.002424	1	Mucinivorans							0.00237	2	0.000374	23	Desulfarculus	Nitritalea
0.001737	1	Candidatus Microgenomatus				0.001186	1	Desulfospira	0.002135	2	Mariniradius	0.002007	2	Azospira	0.002269	1	Mesoaciditoga	0.002424	1	Asinibacterium							0.00237	2	0.000374	23	Kiloniella	Mangrovimonas
0.001737	1	Komagataeibacter				0.001186	1	Nakamurella	0.002135	2	Algiphilus	0.002007	2	Halonatronum	0.002269	1	Gottschalkia	0.002424	1	Saccharicrinis							0.00237	2	0.000374	23	Tepidanaerobacter	Gayadomonas
0.001737	1	Thermoanaerobaculum				0.001186	1	Acidimicrobium	0.002135	2	Caldibacillus	0.002007	2	Roseibium	0.002269	1	Candidatus Paracaedibacter	0.002424	1	Paraglaciecola							0.00237	2	0.000374	23	Caldicoprobacter	Nafulsella
0.001737	1	Candidatus Symbiobacter				0.001186	1	Hyperthermus	0.002135	2	Eggerthia	0.002007	2	Anaeroarcus	0.002269	1	Altibacter	0.002424	1	Pseudothermotoga							0.00237	2	0.000374	23	Candidatus Puniceispirillum	Algiphilus
0.001737	1	Candidatus Iainarchaeum				0.001186	1	Microvirgula	0.002135	2	Candidatus Nasuia	0.002007	2	Xenophilus	0.002269	1	Pseudophaeobacter	0.002424	1	Pseudodonghicola							0.00237	2	0.000374	23	Flavonifractor	Salinarchaeum
0.001737	1	Candidatus Stoquefichus				0.001186	1	Dermacoccus	0.002135	2	Fictibacillus	0.002007	2	Starkeya	0.002269	1	Faecalitalea	0.002424	1	Pseudopedobacter							0.00237	2	0.000374	23	Melioribacter	Eggerthia
0.001737	1	Basilea				0.001186	1	Kytococcus	0.002135	2	Pseudohaliea	0.002007	2	Desulforegula	0.002269	1	Mucinivorans	0.002424	1	Oleiagrimonas							0.00237	2	0.000374	23	Kandleria	Noviherbaspirillum
0.001737	1	Arenitalea				0.001186	1	Spirillospora	0.002135	2	Noviherbaspirillum	0.002007	2	Kozakia	0.002269	1	Caldisalinibacter	0.002424	1	Casaltella							0.00237	2	0.000374	23	Actibacterium	Coprobacter
0.001737	1	Mesoaciditoga				0.001186	1	Sagittula	0.002135	2	Intestinimonas	0.002007	2	Methanothermococcus	0.002269	1	Franconibacter	0.002424	1	Glutamicibacter							0.00237	2	0.000374	23	Draconibacterium	Methyloglobulus
0.001737	1	Romboutsia				0.001186	1	Empedobacter	0.002135	2	Candidatus Halobonum	0.002007	2	Thioflavicoccus	0.002269	1	Pseudopedobacter	0.002424	1	Pseudarthrobacter							0.00237	2	0.000374	23	Gottschalkia	Falsirhodobacter
0.001737	1	Chitinivibrio				0.001186	1	Halogeometricum	0.002135	2	Candidatus Latescibacter	0.002007	2	Planomicrobium	0.002269	1	Rubinisphaera	0.002424	1	Chania							0.00237	2	0.000358	22	Morganella	Thermoanaerobaculum
0.001737	1	Terrisporobacter				0.001186	1	Natronomonas	0.002135	2	Falsirhodobacter	0.002007	2	Oerskovia	0.002269	1	Oleiagrimonas	0.002424	1	Candidatus Nitrosotenuis							0.00237	2	0.000358	22	Hydrogenobacter	Candidatus Symbiobacter
0.001737	1	Intestinibacter				0.001186	1	Nevskia	0.002135	2	Thermophagus	0.002007	2	Ilyobacter	0.002269	1	Actinotignum	0.002424	1	Xanthomarina							0.00237	2	0.000358	22	Methanocorpusculum	Senegalimassilia
0.001737	1	Tyzzerella				0.001186	1	Carnimonas	0.002135	2	Candidatus Symbiobacter	0.002007	2	Citricoccus	0.002269	1	Fenollaria	0.002424	1	Pseudorhizobium							0.00237	2	0.000358	22	Flexistipes	Peptoclostridium
0.001737	1	Neorhizobium				0.001186	1	Marinospirillum	0.002135	2	Timonella	0.002007	2	Thermovibrio	0.002269	1	Glutamicibacter	0.002424	1	Cutibacterium							0.00237	2	0.000358	22	Acetohalobium	Mesoaciditoga
0.001737	1	Candidatus Babela				0.001186	1	Desulfonatronum	0.002135	2	Candidatus Stoquefichus	0.002007	2	Allobaculum	0.002269	1	Lunatimonas	0.002424	1	Candidatus Izimaplasma							0.00237	2	0.000358	22	Lautropia	Thermopetrobacter
0.001737	1	Saccharicrinis				0.001186	1	Cryobacterium	0.002135	2	Basilea	0.002007	2	Lentibacillus	0.002269	1	Candidatus Nitrosotenuis	0.002424	1	Haematomicrobium							0.00237	2	0.000358	22	Thermobifida	Chitinivibrio
0.001737	1	Siccibacter				0.001186	1	Maricaulis	0.002135	2	Peptoclostridium	0.002007	2	Proteocatella	0.002269	1	Paeniclostridium	0.002424	1	Candidatus Vecturithrix							0.00237	2	0.000358	22	Thioalkalimicrobium	Candidatus Paracaedibacter
0.001737	1	Pseudopedobacter				0.001186	1	Mycetocola	0.002135	2	Effusibacillus	0.002007	2	Thalassolituus	0.002269	1	Pseudorhizobium	-------------------------------------------									0.00237	2	0.000358	22	Acidilobus	Altibacter
0.001737	1	Oleiagrimonas				0.001186	1	Aminomonas	0.002135	2	Chitinivibrio	0.002007	2	Alysiella	0.002269	1	Sediminispirochaeta	0.43882	181	Viruses							0.00237	2	0.000358	22	Turicibacter	Sedimentitalea
0.001737	1	Gorillibacterium				0.001186	1	Methanofollis	0.002135	2	Neorhizobium	0.002007	2	Caldimonas	0.002269	1	Cutibacterium	7.46479	3079	cannot be assigned to a genus							0.00237	2	0.000358	22	Pelotomaculum	Pararhodospirillum
0.001737	1	Euryhalocaulis				0.001186	1	Thermanaerovibrio	0.002135	2	Holdemanella	0.002007	2	Scardovia	0.002269	1	Candidatus Izimaplasma	-------------------------------------------									0.00237	2	0.000358	22	Gemmobacter	Hungatella
0.001737	1	Casaltella				0.001186	1	Methylovorus	0.002135	2	Asinibacterium	0.002007	2	Alicycliphilus	0.002269	1	Halodesulfovibrio	77.2177	31850	unclassified							0.00237	2	0.000358	22	Reinekea	Pseudodonghicola
0.001737	1	Tepidicaulis				0.001186	1	Buttiauxella	0.002135	2	Tepidicaulis	0.002007	2	Propionimicrobium	0.002269	1	Ochrovirga										0.00237	2	0.000358	22	Grimontia	Halobacteriovorax
0.001737	1	Glutamicibacter				0.001186	1	Nonomuraea	0.002135	2	Glutamicibacter	0.002007	2	Cobetia	0.002269	1	Candidatus Walczuchella										0.00237	2	0.000358	22	Kangiella	Levyella
0.001737	1	Paeniglutamicibacter				0.001186	1	Succinimonas	0.002135	2	Pseudarthrobacter	0.002007	2	Kineosphaera	-------------------------------------------												0.00237	2	0.000358	22	Coraliomargarita	Pseudarthrobacter
0.001737	1	Pseudarthrobacter				0.001186	1	Succinivibrio	0.002135	2	Vermiphilus	0.002007	2	Fulvimarina	0.408413	180	Viruses										0.00237	2	0.000358	22	Simiduia	Candidatus Nitrosotenuis
0.001737	1	Chania				0.001186	1	Palaeococcus	0.002135	2	Halodesulfovibrio	0.002007	2	Mastigocladopsis	7.04059	3103	cannot be assigned to a genus										0.00237	2	0.000358	22	Candidatus Cloacimonas	Pseudorhizobium
0.001737	1	Vermiphilus				0.001186	1	Slackia	0.002135	2	Rodentibacter	0.002007	2	Methanolacinia	-------------------------------------------												0.00237	2	0.000358	22	Zhouia	Cutibacterium
0.001737	1	Paeniclostridium				0.001186	1	Eggerthella	0.002135	2	Pacificimonas	0.002007	2	Saccharospirillum	71.1615	31363	unclassified										0.00237	2	0.000358	22	Effusibacillus	Halodesulfovibrio
0.001737	1	Clostridioides				0.001186	1	Verrucosispora	0.001067	1	Methylophilus	0.002007	2	Candidatus Portiera													0.00237	2	0.000358	22	Salinispira	Peptoanaerobacter
0.001737	1	Candidatus Izimaplasma				0.001186	1	Candidatus Odyssella	0.001067	1	Phenylobacterium	0.002007	2	Woodsholea													0.001185	1	0.000341	21	Eikenella	Aquaspirillum
0.001737	1	Ochrovirga				0.001186	1	Halorhodospira	0.001067	1	Vitreoscilla	0.002007	2	Anaerotruncus													0.001185	1	0.000341	21	Aquifex	Methylobacter
0.001737	1	Rodentibacter				0.001186	1	Rhodovibrio	0.001067	1	Fluoribacter	0.002007	2	Raphidiopsis													0.001185	1	0.000341	21	Acetomicrobium	Hafnia
-------------------------------------------						0.001186	1	Mogibacterium	0.001067	1	Hafnia	0.002007	2	Marvinbryantia													0.001185	1	0.000341	21	Dehalococcoides	Kluyvera
0.281426	162	Viruses				0.001186	1	Thioalkalimicrobium	0.001067	1	Arsenophonus	0.002007	2	Robiginitalea													0.001185	1	0.000341	21	Methylocella	Salmonella
6.14968	3540	cannot be assigned to a genus				0.001186	1	Richelia	0.001067	1	Thiocapsa	0.002007	2	Pseudoclavibacter													0.001185	1	0.000341	21	Desulfonauticus	Wolinella
-------------------------------------------						0.001186	1	Tetrasphaera	0.001067	1	Prosthecochloris	0.002007	2	Pseudovibrio													0.001185	1	0.000341	21	Salipiger	Syntrophomonas
64.5994	37186	unclassified				0.001186	1	Methanomethylovorans	0.001067	1	Pediococcus	0.002007	2	Algibacter													0.001185	1	0.000341	21	Rubritalea	Weeksella
						0.001186	1	Stanieria	0.001067	1	Marinococcus	0.002007	2	Thermincola													0.001185	1	0.000341	21	Adlercreutzia	Rhodomicrobium
						0.001186	1	Oscillochloris	0.001067	1	Renibacterium	0.002007	2	Candidatus Amoebophilus													0.001185	1	0.000341	21	Methanosphaerula	Marinococcus
						0.001186	1	Acidilobus	0.001067	1	Tropheryma	0.002007	2	Bizionia													0.001185	1	0.000341	21	Dasania	Atopobium
						0.001186	1	Pelistega	0.001067	1	Methanomicrobium	0.002007	2	Salinimonas													0.001185	1	0.000341	21	Salinimicrobium	Pimelobacter
						0.001186	1	Ignatzschineria	0.001067	1	Desulfurococcus	0.002007	2	Subdoligranulum													0.001185	1	0.000341	21	Jejuia	Methanococcoides
						0.001186	1	Bulleidia	0.001067	1	Desulfosarcina	0.002007	2	Laceyella													0.001185	1	0.000341	21	Diplorickettsia	Thermofilum
						0.001186	1	Thermithiobacillus	0.001067	1	Methanopyrus	0.002007	2	Adhaeribacter													0.001185	1	0.000341	21	Halobellus	Thermoproteus
						0.001186	1	Ferrimicrobium	0.001067	1	Flexistipes	0.002007	2	Conchiformibius													0.001185	1	0.000341	21	Candidatus Methanomethylophilus	Xylella
						0.001186	1	Solobacterium	0.001067	1	Brochothrix	0.002007	2	Ignisphaera													0.001185	1	0.000341	21	Aliiglaciecola	Epulopiscium
						0.001186	1	Syntrophothermus	0.001067	1	Thiocystis	0.002007	2	Rhodonellum													0.001185	1	0.000341	21	Senegalimassilia	Brochothrix
						0.001186	1	Oceanimonas	0.001067	1	Lachnospira	0.002007	2	Turneriella													0.001185	1	0.000325	20	Oxalobacter	Anaerobiospirillum
						0.001186	1	Prauserella	0.001067	1	Rikenella	0.002007	2	Desulfovermiculus													0.001185	1	0.000325	20	Prosthecochloris	Thermonema
						0.001186	1	Finegoldia	0.001067	1	Chelatococcus	0.002007	2	Tuberibacillus													0.001185	1	0.000325	20	Symbiobacterium	Ornithobacterium
						0.001186	1	Roseibium	0.001067	1	Petrotoga	0.002007	2	Salimicrobium													0.001185	1	0.000325	20	Desulfurobacterium	Arcanobacterium
						0.001186	1	Desulforegula	0.001067	1	Dolosigranulum	0.002007	2	Simplicispira													0.001185	1	0.000325	20	Carnimonas	Caedibacter
						0.001186	1	Kozakia	0.001067	1	Aminobacter	0.002007	2	Sandarakinorhabdus													0.001185	1	0.000325	20	Pelistega	Amphibacillus
						0.001186	1	Thiorhodospira	0.001067	1	Desulfurella	0.002007	2	Haloplanus													0.001185	1	0.000325	20	Ferrimicrobium	Dolosigranulum
						0.001186	1	Gallibacterium	0.001067	1	Kineococcus	0.002007	2	Mariprofundus													0.001185	1	0.000325	20	Xenophilus	Aminobacter
						0.001186	1	Anaeroglobus	0.001067	1	Neorickettsia	0.002007	2	Deefgea													0.001185	1	0.000325	20	Candidatus Blochmannia	Leptonema
						0.001186	1	Megamonas	0.001067	1	Thermocrispum	0.002007	2	Candidatus Riesia													0.001185	1	0.000325	20	Mucispirillum	Coriobacterium
						0.001186	1	Nodularia	0.001067	1	Jonesia	0.002007	2	Cronobacter													0.001185	1	0.000325	20	Halalkalicoccus	Acetobacterium
						0.001186	1	Raoultella	0.001067	1	Promicromonospora	0.002007	2	Caenispirillum													0.001185	1	0.000325	20	Desulfurispora	Sphaerotilus
						0.001186	1	Planomicrobium	0.001067	1	Geothrix	0.002007	2	Adlercreutzia													0.001185	1	0.000325	20	Luminiphilus	Arthrospira
						0.001186	1	Lentzea	0.001067	1	Desulfohalobium	0.002007	2	Simiduia													0.001185	1	0.000325	20	Candidatus Methanoperedens	Thermocrispum
						0.001186	1	Sphingopyxis	0.001067	1	Entomoplasma	0.002007	2	Chelativorans													0.001185	1	0.000325	20	Mesoaciditoga	Chromohalobacter
						0.001186	1	Laribacter	0.001067	1	Agrococcus	0.002007	2	Methanosphaerula													0.001185	1	0.000325	20	Halapricum	Jonesia
						0.001186	1	Eremococcus	0.001067	1	Cenarchaeum	0.002007	2	Haliea													0.001185	1	0.000325	20	Niveispirillum	Johnsonella
						0.001186	1	Thermovibrio	0.001067	1	Syntrophobotulus	0.002007	2	Bibersteinia													0.001185	1	0.000325	20	Holdemanella	Desulfohalobium
						0.001186	1	Aurantimonas	0.001067	1	Wigglesworthia	0.002007	2	Thermogladius													0.001185	1	0.000309	19	Thermomicrobium	Hydrogenophaga
						0.001186	1	Marinithermus	0.001067	1	Nakamurella	0.002007	2	Tepidanaerobacter													0.001185	1	0.000309	19	Tropheryma	Lautropia
						0.001186	1	Thalassolituus	0.001067	1	Pyrolobus	0.002007	2	Kushneria													0.001185	1	0.000309	19	Desulfurococcus	Syntrophobotulus
						0.001186	1	Geoglobus	0.001067	1	Thermosphaera	0.002007	2	Syntrophorhabdus													0.001185	1	0.000309	19	Methanohalobium	Desulfospira
						0.001186	1	Pelotomaculum	0.001067	1	Aeropyrum	0.002007	2	Clostridiisalibacter													0.001185	1	0.000309	19	Cardiobacterium	Janibacter
						0.001186	1	Nanoarchaeum	0.001067	1	Dermacoccus	0.002007	2	Thalassobaculum													0.001185	1	0.000309	19	Hydrogenophaga	Deferribacter
						0.001186	1	Caldimonas	0.001067	1	Sagittula	0.002007	2	Aromatoleum													0.001185	1	0.000309	19	Maricaulis	Acidimicrobium
						0.001186	1	Terasakiella	0.001067	1	Bergeyella	0.002007	2	Candidatus Hamiltonella													0.001185	1	0.000309	19	Desulforegula	Thermosphaera
						0.001186	1	Parascardovia	0.001067	1	Desulfobacca	0.002007	2	Chitiniphilus													0.001185	1	0.000309	19	Gallibacterium	Planktothrix
						0.001186	1	Tepidiphilus	0.001067	1	Sanguibacter	0.002007	2	Robinsoniella													0.001185	1	0.000309	19	Magnetococcus	Microvirgula
						0.001186	1	Candidatus Blochmannia	0.001067	1	Coprothermobacter	0.002007	2	Aliihoeflea													0.001185	1	0.000309	19	Anaerostipes	Kytococcus
						0.001186	1	Desulfonauticus	0.001067	1	Aquamicrobium	0.002007	2	Afifella													0.001185	1	0.000309	19	Thermosinus	Sagittula
						0.001186	1	Anaerostipes	0.001067	1	Cryobacterium	0.002007	2	Oceanibaculum													0.001185	1	0.000309	19	Phaeobacter	Sanguibacter
						0.001186	1	Kineosphaera	0.001067	1	Frateuria	0.002007	2	Methermicoccus													0.001185	1	0.000309	19	Cronobacter	Thiorhodovibrio
						0.001186	1	Enhydrobacter	0.001067	1	Maricaulis	0.002007	2	Novispirillum													0.001185	1	0.000309	19	Robiginitomaculum	Coprothermobacter
						0.001186	1	Histophilus	0.001067	1	Mycetocola	0.002007	2	Phycisphaera													0.001185	1	0.000309	19	Rhodoluna	Terracoccus
						0.001186	1	Desulfatibacillum	0.001067	1	Cylindrospermopsis	0.002007	2	Dehalogenimonas													0.001185	1	0.000309	19	Calditerrivibrio	Thermobacillus
						0.001186	1	Methanolacinia	0.001067	1	Methanofollis	0.002007	2	Salisaeta													0.001185	1	0.000309	19	Chitiniphilus	Succinispira
						0.001186	1	Anaerolinea	0.001067	1	Thermanaerovibrio	0.002007	2	Halogranum													0.001185	1	0.000309	19	Haloglycomyces	Aminomonas
						0.001186	1	Candidatus Portiera	0.001067	1	Centipeda	0.002007	2	Bavariicoccus													0.001185	1	0.000309	19	Basfia	Methanofollis
						0.001186	1	Pseudorhodobacter	0.001067	1	Anaerovibrio	0.002007	2	Desulfocurvus													0.001185	1	0.000309	19	Halolamina	Anaerovibrio
						0.001186	1	Anaerotruncus	0.001067	1	Leminorella	0.002007	2	Tomitella													0.001185	1	0.000309	19	Pseudohaliea	Leminorella
						0.001186	1	Pseudoclavibacter	0.001067	1	Nonomuraea	0.002007	2	Halonotius													0.001185	1	0.000309	19	Thalassotalea	Candidatus Odyssella
						0.001186	1	Parvibaculum	0.001067	1	Succinimonas	0.002007	2	Bhargavaea													0.001185	1	0.000309	19	Pseudophaeobacter	Richelia
						0.001186	1	Pseudovibrio	0.001067	1	Beutenbergia	0.002007	2	Flavonifractor													0.001185	1	0.000293	18	Gallionella	Tetrasphaera
						0.001186	1	Pleomorphomonas	0.001067	1	Marichromatium	0.002007	2	Candidatus Moranella													0.001185	1	0.000293	18	Thiocystis	Acidilobus
						0.001186	1	Kangiella	0.001067	1	Rhodovibrio	0.002007	2	Fortiea													0.001185	1	0.000293	18	Candidatus Magnetobacterium	Pelistega
						0.001186	1	Nitratifractor	0.001067	1	Modestobacter	0.002007	2	Halobellus													0.001185	1	0.000293	18	Entomoplasma	Denitrovibrio
						0.001186	1	Atopococcus	0.001067	1	Gluconacetobacter	0.002007	2	Candidatus Photodesmus													0.001185	1	0.000293	18	Pyrolobus	Ferrimicrobium
						0.001186	1	Candidatus Cardinium	0.001067	1	Thioalkalimicrobium	0.002007	2	Methyloferula													0.001185	1	0.000293	18	Mannheimia	Syntrophothermus
						0.001186	1	Acaricomes	0.001067	1	Aquabacterium	0.002007	2	Mariniradius													0.001185	1	0.000293	18	Centipeda	Thermobispora
						0.001186	1	Subdoligranulum	0.001067	1	Ketogulonicigenium	0.002007	2	Algiphilus													0.001185	1	0.000293	18	Leminorella	Finegoldia
						0.001186	1	Rubellimicrobium	0.001067	1	Pelistega	0.002007	2	Polycyclovorans													0.001185	1	0.000293	18	Natronorubrum	Halonatronum
						0.001186	1	Catellicoccus	0.001067	1	Halothiobacillus	0.002007	2	Eggerthia													0.001185	1	0.000293	18	Micavibrio	Blastomonas
						0.001186	1	Phaeobacter	0.001067	1	Solobacterium	0.002007	2	Arcticibacter													0.001185	1	0.000293	18	Croceibacter	Thermobrachium
						0.001186	1	Turneriella	0.001067	1	Natronorubrum	0.002007	2	Kosakonia													0.001185	1	0.000293	18	Yaniella	Anaeroarcus
						0.001186	1	Tuberibacillus	0.001067	1	Prauserella	0.002007	2	Shimwellia													0.001185	1	0.000293	18	Candidatus Portiera	Desulforegula
						0.001186	1	Paludibacter	0.001067	1	Thermobispora	0.002007	2	Intestinimonas													0.001185	1	0.000293	18	Candidatus Amoebophilus	Thiorhodospira
						0.001186	1	Granulibacter	0.001067	1	Halonatronum	0.002007	2	Youngiibacter													0.001185	1	0.000293	18	Herminiimonas	Methanothermococcus
						0.001186	1	Phycicoccus	0.001067	1	Thermobrachium	0.002007	2	Methyloglobulus													0.001185	1	0.000293	18	Thermovirga	Yokenella
						0.001186	1	Haloplanus	0.001067	1	Desulforegula	0.002007	2	Candidatus Omnitrophus													0.001185	1	0.000293	18	Aciduliprofundum	Raoultella
						0.001186	1	Maribius	0.001067	1	Methanothermococcus	0.002007	2	Thermophagus													0.001185	1	0.000293	18	Deefgea	Caloranaerobacter
						0.001186	1	Maritimibacter	0.001067	1	Anaeroglobus	0.002007	2	Candidatus Atelocyanobacterium													0.001185	1	0.000293	18	Thermogladius	Halosimplex
						0.001186	1	Cronobacter	0.001067	1	Thioflavicoccus	0.002007	2	Candidatus Stoquefichus													0.001185	1	0.000293	18	Desulfonatronospira	Ramlibacter
						0.001186	1	Aureimonas	0.001067	1	Raoultella	0.002007	2	Basilea													0.001185	1	0.000293	18	Sediminibacterium	Anaerophaga
						0.001186	1	Elusimicrobium	0.001067	1	Laribacter	0.002007	2	Enorma													0.001185	1	0.000293	18	Butyricimonas	Allofustis
						0.001186	1	Tumebacillus	0.001067	1	Citricoccus	0.002007	2	Neorhizobium													0.001185	1	0.000293	18	Sulfuricella	Alysiella
						0.001186	1	Simiduia	0.001067	1	Caloranaerobacter	0.002007	2	Niveispirillum													0.001185	1	0.000293	18	Gayadomonas	Parascardovia
						0.001186	1	Granulicoccus	0.001067	1	Eremococcus	0.002007	2	Holdemanella													0.001185	1	0.000293	18	Candidatus Endolissoclinum	Caldisphaera
						0.001186	1	Candidatus Cloacimonas	0.001067	1	Allobaculum	0.002007	2	Pararhodospirillum													0.001185	1	0.000293	18	Candidatus Halobonum	Halomicrobium
						0.001186	1	Elioraea	0.001067	1	Ramlibacter	0.002007	2	Asinibacterium													0.001185	1	0.000293	18	Chitinivibrio	Tepidiphilus
						0.001186	1	Terribacillus	0.001067	1	Proteocatella	0.002007	2	Mageeibacillus													0.001185	1	0.000293	18	Casaltella	Desulfonauticus
						0.001186	1	Haloplasma	0.001067	1	Rubritepida	0.002007	2	Actinotignum													0.001185	1	0.000293	18	Paraclostridium	Oceanithermus
						0.001186	1	Candidatus Desulforudis	0.001067	1	Xylanimonas	0.002007	2	Levyella													0.001185	1	0.000276	17	Kluyvera	Mesonia
						0.001186	1	Methanosphaerula	0.001067	1	Thalassolituus	0.002007	2	Glutamicibacter													0.001185	1	0.000276	17	Oligotropha	Hylemonella
						0.001186	1	Haliea	0.001067	1	Nautilia	0.002007	2	Paenarthrobacter													0.001185	1	0.000276	17	Catonella	Candidatus Portiera
						0.001186	1	Thermogladius	0.001067	1	Allofustis	0.002007	2	Paeniclostridium													0.001185	1	0.000276	17	Brenneria	Pseudorhodobacter
						0.001186	1	Tepidanaerobacter	0.001067	1	Nanoarchaeum	0.002007	2	Ochrovirga													0.001185	1	0.000276	17	Actinobaculum	Akkermansia
						0.001186	1	Methanolinea	0.001067	1	Caldimonas	0.002007	2	Haematomicrobium													0.001185	1	0.000276	17	Mahella	Mucispirillum
						0.001186	1	Dasania	0.001067	1	Kineosphaera	0.002007	2	Pacificimonas													0.001185	1	0.000276	17	Bizionia	Marvinbryantia
						0.001186	1	Kushneria	0.001067	1	Candidatus Glomeribacter	0.001004	1	Simonsiella													0.001185	1	0.000276	17	Dinoroseobacter	Isoptericola
						0.001186	1	Desulfurispora	0.001067	1	Formosa	0.001004	1	Azotobacter													0.001185	1	0.000276	17	Sideroxydans	Agarivorans
						0.001186	1	Sharpea	0.001067	1	Mesonia	0.001004	1	Methylobacter													0.001185	1	0.000276	17	Mariprofundus	Algibacter
						0.001186	1	Thalassobaculum	0.001067	1	Candidatus Portiera	0.001004	1	Anaplasma													0.001185	1	0.000276	17	Candidatus Desulforudis	Salipiger
						0.001186	1	Salinimicrobium	0.001067	1	Salinibacterium	0.001004	1	Dichelobacter													0.001185	1	0.000276	17	Kosmotoga	Trichormus
						0.001186	1	Candidatus Hamiltonella	0.001067	1	Akkermansia	0.001004	1	Acidaminococcus													0.001185	1	0.000276	17	Halarchaeum	Anaerofustis
						0.001186	1	Butyricimonas	0.001067	1	Anaerotruncus	0.001004	1	Rhodomicrobium													0.001185	1	0.000276	17	Lonsdalea	Serinicoccus
						0.001186	1	Amorphus	0.001067	1	Raphidiopsis	0.001004	1	Piscirickettsia													0.001185	1	0.000276	17	Noviherbaspirillum	Thalassobacter
						0.001186	1	Wohlfahrtiimonas	0.001067	1	Robiginitalea	0.001004	1	Micrococcus													0.001185	1	0.000276	17	Arenitalea	Atopococcus
						0.001186	1	Smaragdicoccus	0.001067	1	Natronolimnobius	0.001004	1	Methanohalophilus													0.001185	1	0.000276	17	Candidatus Babela	Winogradskyella
						0.001186	1	Spongiibacter	0.001067	1	Ethanoligenens	0.001004	1	Methanomicrobium													0.001185	1	0.00026	16	Brucella	Catellicoccus
						0.001186	1	Thalassobium	0.001067	1	Isoptericola	0.001004	1	Hirschia													0.001185	1	0.00026	16	Hafnia	Phaeobacter
						0.001186	1	Oceanibaculum	0.001067	1	Pseudovibrio	0.001004	1	Symbiobacterium													0.001185	1	0.00026	16	Weeksella	Herminiimonas
						0.001186	1	Methermicoccus	0.001067	1	Agarivorans	0.001004	1	Vagococcus													0.001185	1	0.00026	16	Methanococcoides	Simplicispira
						0.001186	1	Novispirillum	0.001067	1	Algibacter	0.001004	1	Anaerobiospirillum													0.001185	1	0.00026	16	Amphibacillus	Pelagibaca
						0.001186	1	Paraoerskovia	0.001067	1	Kangiella	0.001004	1	Thiocystis													0.001185	1	0.00026	16	Halobacteroides	Haematobacter
						0.001186	1	Succinatimonas	0.001067	1	Thermobaculum	0.001004	1	Brachymonas													0.001185	1	0.00026	16	Geothrix	Phycicoccus
						0.001186	1	Salisaeta	0.001067	1	Trichormus	0.001004	1	Rothia													0.001185	1	0.00026	16	Acidocella	Haloplanus
						0.001186	1	Caldisericum	0.001067	1	Candidatus Cardinium	0.001004	1	Kineococcus													0.001185	1	0.00026	16	Ferroplasma	Mariprofundus
						0.001186	1	Halogranum	0.001067	1	Martelella	0.001004	1	Dermabacter													0.001185	1	0.00026	16	Alkalibacterium	Desulfurispirillum
						0.001186	1	Basfia	0.001067	1	Candidatus Hepatoplasma	0.001004	1	Thermocrispum													0.001185	1	0.00026	16	Methanothermobacter	Andreprevotia
						0.001186	1	Gallaecimonas	0.001067	1	Catellicoccus	0.001004	1	Oligotropha													0.001185	1	0.00026	16	Ilyobacter	Candidatus Riesia
						0.001186	1	Candidatus Puniceispirillum	0.001067	1	Herminiimonas	0.001004	1	Jonesia													0.001185	1	0.00026	16	Nautilia	Maritimibacter
						0.001186	1	Phocaeicola	0.001067	1	Dinoroseobacter	0.001004	1	Holospora													0.001185	1	0.00026	16	Saccharospirillum	Desulfovirgula
						0.001186	1	Candidatus Moranella	0.001067	1	Gaetbulibacter	0.001004	1	Entomoplasma													0.001185	1	0.00026	16	Owenweeksia	Salsuginibacillus
						0.001186	1	Defluviimonas	0.001067	1	Emticicia	0.001004	1	Tetragenococcus													0.001185	1	0.00026	16	Winogradskyella	Jonquetella
						0.001186	1	Ponticaulis	0.001067	1	Halovivax	0.001004	1	Desulfonatronovibrio													0.001185	1	0.00026	16	Desulfitibacter	Coraliomargarita
						0.001186	1	Deferrisoma	0.001067	1	Conchiformibius	0.001004	1	Pyrolobus													0.001185	1	0.00026	16	Halostagnicola	Mangrovibacter
						0.001186	1	Methyloferula	0.001067	1	Turneriella	0.001004	1	Thermosphaera													0.001185	1	0.00026	16	Desulfurispirillum	Joostella
						0.001186	1	Catenovulum	0.001067	1	Desulfovermiculus	0.001004	1	Aeropyrum													0.001185	1	0.00026	16	Zunongwangia	Saccharibacillus
						0.001186	1	Nitritalea	0.001067	1	Simplicispira	0.001004	1	Kytococcus													0.001185	1	0.00026	16	Ornithinibacillus	Candidatus Cloacimonas
						0.001186	1	Oceaniovalibus	0.001067	1	Pelagibaca	0.001004	1	Coprothermobacter													0.001185	1	0.00026	16	Psychrilyobacter	Haloplasma
						0.001186	1	Mangrovimonas	0.001067	1	Phycicoccus	0.001004	1	Aquamicrobium													0.001185	1	0.00026	16	Lacticigenium	Candidatus Desulforudis
						0.001186	1	Stomatobaculum	0.001067	1	Caldalkalibacillus	0.001004	1	Cryobacterium													0.001185	1	0.00026	16	Snodgrassella	Dasania
						0.001186	1	Gayadomonas	0.001067	1	Galbibacter	0.001004	1	Frateuria													0.001185	1	0.00026	16	Candidatus Schmidhempelia	Sneathiella
						0.001186	1	Candidatus Endolissoclinum	0.001067	1	Sediminibacter	0.001004	1	Maricaulis													0.001185	1	0.000244	15	Methanosphaera	Desulfurispora
						0.001186	1	Candidatus Ancillula	0.001067	1	Halopiger	0.001004	1	Thermanaerovibrio													0.001185	1	0.000244	15	Epulopiscium	Syntrophorhabdus
						0.001186	1	Caldibacillus	0.001067	1	Aestuariimicrobium	0.001004	1	Centipeda													0.001185	1	0.000244	15	Melissococcus	Amphritea
						0.001186	1	Planktomarina	0.001067	1	Caenispirillum	0.001004	1	Leminorella													0.001185	1	0.000244	15	Halogeometricum	Sharpea
						0.001186	1	Kosakonia	0.001067	1	Reyranella	0.001004	1	Allochromatium													0.001185	1	0.000244	15	Parascardovia	Thalassobaculum
						0.001186	1	Candidatus Saccharimonas	0.001067	1	Granulicoccus	0.001004	1	Asaia													0.001185	1	0.000244	15	Methanosalsum	Candidatus Aquiluna
						0.001186	1	Spiribacter	0.001067	1	Desulfarculus	0.001004	1	Thioalkalimicrobium													0.001185	1	0.000244	15	Marvinbryantia	Fructobacillus
						0.001186	1	Luminiphilus	0.001067	1	Saccharibacillus	0.001004	1	Ketogulonicigenium													0.001185	1	0.000244	15	Chlorobaculum	Parasutterella
						0.001186	1	Pseudohaliea	0.001067	1	Nosocomiicoccus	0.001004	1	Anaerovorax													0.001185	1	0.000244	15	Butyricicoccus	Enterorhabdus
						0.001186	1	Noviherbaspirillum	0.001067	1	Methanolinea	0.001004	1	Denitrovibrio													0.001185	1	0.000244	15	Bermanella	Amorphus
						0.001186	1	Aliiglaciecola	0.001067	1	Sediminibacterium	0.001004	1	Bulleidia													0.001185	1	0.000244	15	Bhargavaea	Wohlfahrtiimonas
						0.001186	1	Youngiibacter	0.001067	1	Sneathiella	0.001004	1	Ferrimicrobium													0.001185	1	0.000244	15	Ponticaulis	Robinsoniella
						0.001186	1	Actibacterium	0.001067	1	Desulfurispora	0.001004	1	Syntrophothermus													0.001185	1	0.000244	15	Salinarchaeum	Aliihoeflea
						0.001186	1	Falsirhodobacter	0.001067	1	Candidatus Azobacteroides	0.001004	1	Thermomonas													0.001185	1	0.000244	15	Pluralibacter	Lacticigenium
						0.001186	1	Candidatus Symbiobacter	0.001067	1	Candidatus Aquiluna	0.001004	1	Salinibacter													0.001185	1	0.000244	15	Candidatus Omnitrophus	Pyramidobacter
						0.001186	1	Candidatus Xenolissoclinum	0.001067	1	Aromatoleum	0.001004	1	Finegoldia													0.001185	1	0.000244	15	Candidatus Symbiobacter	Haloglycomyces
						0.001186	1	Ferriphaselus	0.001067	1	Butyricimonas	0.001004	1	Blastomonas													0.001185	1	0.000244	15	Kallipyga	Chelonobacter
						0.001186	1	Basilea	0.001067	1	Parasutterella	0.001004	1	Thermobrachium													0.001185	1	0.000244	15	Tyzzerella	Sediminimonas
						0.001186	1	Senegalimassilia	0.001067	1	Wohlfahrtiimonas	0.001004	1	Anaeroglobus													0.001185	1	0.000244	15	Caldisalinibacter	Novispirillum
						0.001186	1	Arenitalea	0.001067	1	Thalassobium	0.001004	1	Raoultella													0.001185	1	0.000244	15	Levyella	Perlucidibaca
						0.001186	1	Chitinivibrio	0.001067	1	Lacticigenium	0.001004	1	Lentzea													0.001185	1	0.000244	15	Ochrovirga	Dehalogenimonas
						0.001186	1	Tyzzerella	0.001067	1	Gracilimonas	0.001004	1	Eremococcus													0.001185	1	0.000228	14	Simonsiella	Succinatimonas
						0.001186	1	Candidatus Paracaedibacter	0.001067	1	Wenxinia	0.001004	1	Ramlibacter													0.001185	1	0.000228	14	Methanospirillum	Caldisericum
						0.001186	1	Neorhizobium	0.001067	1	Sediminimonas	0.001004	1	Varibaculum													0.001185	1	0.000228	14	Brochothrix	Desulfocurvus
						0.001186	1	Sedimentitalea	0.001067	1	Methermicoccus	0.001004	1	Jannaschia													0.001185	1	0.000228	14	Anaerobiospirillum	Caldicoprobacter
						0.001186	1	Salinispira	0.001067	1	Paraoerskovia	0.001004	1	Geoglobus													0.001185	1	0.000228	14	Sphaerotilus	Gallaecimonas
						0.001186	1	Siccibacter	0.001067	1	Dehalogenimonas	0.001004	1	Nautilia													0.001185	1	0.000228	14	Ignicoccus	Jejuia
						0.001186	1	Pseudodonghicola	0.001067	1	Ilumatobacter	0.001004	1	Caminibacter													0.001185	1	0.000228	14	Marinilabilia	Candidatus Moranella
						0.001186	1	Actinotignum	0.001067	1	Fervidicoccus	0.001004	1	Allofustis													0.001185	1	0.000228	14	Cetobacterium	Fortiea
						0.001186	1	Levyella	0.001067	1	Halogranum	0.001004	1	Nanoarchaeum													0.001185	1	0.000228	14	Thalassolituus	Halobellus
						0.001186	1	Paeniglutamicibacter	0.001067	1	Desulfocurvus	0.001004	1	Tannerella													0.001185	1	0.000228	14	Pseudorhodobacter	Defluviimonas
						0.001186	1	Paeniclostridium	0.001067	1	Tomitella	0.001004	1	Parascardovia													0.001185	1	0.000228	14	Paludibacter	Porticoccus
						0.001186	1	Parageobacillus	0.001067	1	Candidatus Puniceispirillum	0.001004	1	Halomicrobium													0.001185	1	0.000228	14	Mangrovibacter	Allokutzneria
						0.001186	1	Pseudopropionibacterium	0.001067	1	Diplorickettsia	0.001004	1	Anaerostipes													0.001185	1	0.000228	14	Saccharibacillus	Snodgrassella
						0.001186	1	Halodesulfovibrio	0.001067	1	Flavonifractor	0.001004	1	Histophilus													0.001185	1	0.000228	14	Amphritea	Gryllotalpicola
						0.001186	1	Haematomicrobium	0.001067	1	Litoreibacter	0.001004	1	Alkanindiges													0.001185	1	0.000228	14	Candidatus Aquiluna	Oceaniovalibus
						0.001186	1	Pacificimonas	0.001067	1	Candidatus Nitrosoarchaeum	0.001004	1	Pannonibacter													0.001185	1	0.000228	14	Candidatus Nitrosoarchaeum	Stomatobaculum
						-------------------------------------------			0.001067	1	Candidatus Moranella	0.001004	1	Mesonia													0.001185	1	0.000228	14	Schleiferia	Lysinimicrobium
						0.316651	267	Viruses	0.001067	1	Commensalibacter	0.001004	1	Salinibacterium													0.001185	1	0.000228	14	Coprobacter	Candidatus Endolissoclinum
						5.47438	4616	cannot be assigned to a genus	0.001067	1	Defluviimonas	0.001004	1	Pseudorhodobacter													0.001185	1	0.000228	14	Falsirhodobacter	Candidatus Hepatobacter
						-------------------------------------------			0.001067	1	Dongia	0.001004	1	Isoptericola													0.001185	1	0.000228	14	Candidatus Iainarchaeum	Kandleria
						74.2837	62636	unclassified	0.001067	1	Imtechella	0.001004	1	Thermobaculum													0.001185	1	0.000228	14	Thermopetrobacter	Planktomarina
									0.001067	1	Snodgrassella	0.001004	1	Trichormus													0.001185	1	0.000228	14	Siccibacter	Candidatus Methanomethylophilus
									0.001067	1	Stomatobaculum	0.001004	1	Thalassobacter													0.001185	1	0.000228	14	Fenollaria	Kosakonia
									0.001067	1	Candidatus Endolissoclinum	0.001004	1	Atopococcus													0.001185	1	0.000228	14	Chania	Schleiferia
									0.001067	1	Candidatus Ancillula	0.001004	1	Avibacterium													0.001185	1	0.000228	14	Halodesulfovibrio	Shimwellia
									0.001067	1	Candidatus Hepatobacter	0.001004	1	Herminiimonas													0.001185	1	0.000211	13	Piscirickettsia	Spiribacter
									0.001067	1	Kandleria	0.001004	1	Shinella													0.001185	1	0.000211	13	Alloiococcus	Pseudohaliea
									0.001067	1	Planktomarina	0.001004	1	Rubritalea													0.001185	1	0.000211	13	Synergistes	Lutibaculum
									0.001067	1	Kosakonia	0.001004	1	Belnapia													0.001185	1	0.000211	13	Desulfurella	Candidatus Profftella
									0.001067	1	Spiribacter	0.001004	1	Phycicoccus													0.001185	1	0.000211	13	Abiotrophia	Intestinimonas
									0.001067	1	Luminiphilus	0.001004	1	Galbibacter													0.001185	1	0.000211	13	Gelidibacter	Fervidicella
									0.001067	1	Coprobacter	0.001004	1	Desulfurispirillum													0.001185	1	0.000211	13	Thermosphaera	Candidatus Omnitrophus
									0.001067	1	Candidatus Profftella	0.001004	1	Candidatus Midichloria													0.001185	1	0.000211	13	Natronomonas	Candidatus Microgenomatus
									0.001067	1	Youngiibacter	0.001004	1	Desulfovirgula													0.001185	1	0.000211	13	Aquabacterium	Candidatus Xenolissoclinum
									0.001067	1	Actibacterium	0.001004	1	Stenoxybacter													0.001185	1	0.000211	13	Denitrovibrio	Kallipyga
									0.001067	1	Ferriphaselus	0.001004	1	Elusimicrobium													0.001185	1	0.000211	13	Acetoanaerobium	Tyzzerella
									0.001067	1	Candidatus Iainarchaeum	0.001004	1	Jonquetella													0.001185	1	0.000211	13	Candidatus Glomeribacter	Candidatus Phaeomarinobacter
									0.001067	1	Enorma	0.001004	1	Terribacillus													0.001185	1	0.000211	13	Atopococcus	Pseudophaeobacter
									0.001067	1	Kallipyga	0.001004	1	Ornithinibacillus													0.001185	1	0.000211	13	Candidatus Protochlamydia	Halapricum
									0.001067	1	Arenitalea	0.001004	1	Candidatus Korarchaeum													0.001185	1	0.000211	13	Acaricomes	Niveispirillum
									0.001067	1	Thermopetrobacter	0.001004	1	Dasania													0.001185	1	0.000211	13	Jonquetella	Faecalitalea
									0.001067	1	Candidatus Schmidhempelia	0.001004	1	Candidatus Azobacteroides													0.001185	1	0.000211	13	Succinatimonas	Holdemanella
									0.001067	1	Sedimentitalea	0.001004	1	Amphritea													0.001185	1	0.000211	13	Litoreibacter	Mucinivorans
									0.001067	1	Halapricum	0.001004	1	Candidatus Aquiluna													0.001185	1	0.000211	13	Stomatobaculum	Salinispira
									0.001067	1	Faecalitalea	0.001004	1	Rhodoluna													0.001185	1	0.000211	13	Altibacter	Mageeibacillus
									0.001067	1	Mucinivorans	0.001004	1	Fructobacillus													0.001185	1	0.000211	13	Faecalitalea	Oleiagrimonas
									0.001067	1	Salinispira	0.001004	1	Salinimicrobium													0.001185	1	0.000195	12	Ornithobacterium	Fenollaria
									0.001067	1	Oleiagrimonas	0.001004	1	Candidatus Regiella													0.001185	1	0.000195	12	Desulfohalobium	Tepidicaulis
									0.001067	1	Fenollaria	0.001004	1	Parasutterella													0.001185	1	0.000195	12	Leclercia	Paenarthrobacter
									0.001067	1	Euryhalocaulis	0.001004	1	Enterorhabdus													0.001185	1	0.000195	12	Pseudoramibacter	Pseudopropionibacterium
									0.001067	1	Casaltella	0.001004	1	Leeia													0.001185	1	0.000195	12	Halalkalibacillus	Candidatus Walczuchella
									0.001067	1	Pseudoglutamicibacter	0.001004	1	Haloglycomyces													-------------------------------------------		0.000195	12	Joostella
									0.001067	1	Paeniclostridium	0.001004	1	Fervidicoccus													0.348461	294	0.000195	12	Methanolinea	Viruses
									0.001067	1	Atlantibacter	0.001004	1	Caldisericum													7.93282	6693	0.000195	12	Wohlfahrtiimonas	cannot be assigned to a genus
									0.001067	1	Pseudorhizobium	0.001004	1	Basfia													-------------------------------------------		0.000195	12	Halogranum
									-------------------------------------------			0.001004	1	Halarchaeum													71.9323	60690	0.000195	12	Candidatus Ancillula	unclassified
									0.347949	326	Viruses	0.001004	1	Gallaecimonas															0.000195	12	Vermiphilus
									5.9749	5598	cannot be assigned to a genus	0.001004	1	Candidatus Puniceispirillum															0.000179	11	Aquaspirillum
									-------------------------------------------			0.001004	1	Rudaea															0.000179	11	Coxiella
									70.8662	66396	unclassified	0.001004	1	Litoreibacter															0.000179	11	Rikenella
												0.001004	1	Candidatus Nitrosoarchaeum															0.000179	11	Brachymonas
												0.001004	1	Candidatus Caldiarchaeum															0.000179	11	Chloroherpeton
												0.001004	1	Halolamina															0.000179	11	Anaerovorax
												0.001004	1	Pelagibacterium															0.000179	11	Trichormus
												0.001004	1	Defluviimonas															0.000179	11	Halovivax
												0.001004	1	Porticoccus															0.000179	11	Candidatus Korarchaeum
												0.001004	1	Dongia															0.000179	11	Parasutterella
												0.001004	1	Nitritalea															0.000179	11	Candidatus Microgenomatus
												0.001004	1	Snodgrassella															0.000179	11	Basilea
												0.001004	1	Gryllotalpicola															0.000179	11	Mucinivorans
												0.001004	1	Oceaniovalibus															0.000163	10	Acidaminococcus
												0.001004	1	Stomatobaculum															0.000163	10	Taylorella
												0.001004	1	Candidatus Endolissoclinum															0.000163	10	Hyperthermus
												0.001004	1	Candidatus Ancillula															0.000163	10	Marinospirillum
												0.001004	1	Salinarchaeum															0.000163	10	Thermobacillus
												0.001004	1	Candidatus Hepatobacter															0.000163	10	Syntrophothermus
												0.001004	1	Planktomarina															0.000163	10	Caldimonas
												0.001004	1	Candidatus Methanomethylophilus															0.000163	10	Propionimicrobium
												0.001004	1	Candidatus Nasuia															0.000163	10	Gaetbulibacter
												0.001004	1	Pluralibacter															0.000163	10	Candidatus Midichloria
												0.001004	1	Schleiferia															0.000163	10	Fructobacillus
												0.001004	1	Candidatus Microgenomatus															0.000163	10	Fervidicoccus
												0.001004	1	Thermoanaerobaculum															0.000163	10	Salisaeta
												0.001004	1	Candidatus Symbiobacter															0.000163	10	Phocaeicola
												0.001004	1	Candidatus Iainarchaeum															0.000163	10	Trueperella
												0.001004	1	Timonella															0.000163	10	Phaseolibacter
												0.001004	1	Senegalimassilia															0.000163	10	Faecalicoccus
												0.001004	1	Thermopetrobacter															0.000163	10	Atlantibacter
												0.001004	1	Candidatus Schmidhempelia															0.000163	10	Pseudopropionibacterium
												0.001004	1	Thalassotalea															0.000146	9	Ketogulonicigenium
												0.001004	1	Candidatus Phaeomarinobacter															0.000146	9	Desulfotignum
												0.001004	1	Pseudophaeobacter															0.000146	9	Lachnobacterium
												0.001004	1	Oleiagrimonas															0.000146	9	Megamonas
												0.001004	1	Fenollaria															0.000146	9	Lentibacillus
												0.001004	1	Cutibacterium															0.000146	9	Geoglobus
												0.001004	1	Pseudopropionibacterium															0.000146	9	Caldisphaera
												0.001004	1	Halodesulfovibrio															0.000146	9	Candidatus Riesia
												0.001004	1	Candidatus Walczuchella															0.000146	9	Stenoxybacter
												-------------------------------------------																	0.000146	9	Candidatus Regiella
												0.417457	416	Viruses															0.000146	9	Pyramidobacter
												6.84991	6826	cannot be assigned to a genus															0.000146	9	Dehalogenimonas
												-------------------------------------------																	0.000146	9	Caldisericum
												75.3349	75072	unclassified															0.000146	9	Mangrovimonas
																													0.000146	9	Candidatus Hepatobacter
																													0.000146	9	Candidatus Saccharimonas
																													0.000146	9	Asinibacterium
																													0.000146	9	Pseudoglutamicibacter
																													0.00013	8	Ectothiorhodospira
																													0.00013	8	Petrotoga
																													0.00013	8	Ewingella
																													0.00013	8	Geovibrio
																													0.00013	8	Coprothermobacter
																													0.00013	8	Roseibacterium
																													0.00013	8	Planomicrobium
																													0.00013	8	Aminiphilus
																													0.00013	8	Candidatus Hamiltonella
																													0.00013	8	Perlucidibaca
																													0.00013	8	Candidatus Xenolissoclinum
																													0.00013	8	Mageeibacillus
																													0.00013	8	Franconibacter
																													0.00013	8	Oleiagrimonas
																													0.00013	8	Candidatus Nitrosotenuis
																													0.000114	7	Vitreoscilla
																													0.000114	7	Holospora
																													0.000114	7	Caldivirga
																													0.000114	7	Atopobacter
																													0.000114	7	Anaeroglobus
																													0.000114	7	Caloranaerobacter
																													0.000114	7	Akkermansia
																													0.000114	7	Thermosediminibacter
																													0.000114	7	Haloplanus
																													0.000114	7	Nosocomiicoccus
																													0.000114	7	Nitritalea
																													9.8e-05	6	Coriobacterium
																													9.8e-05	6	Cenarchaeum
																													9.8e-05	6	Methanofollis
																													9.8e-05	6	Palaeococcus
																													9.8e-05	6	Bulleidia
																													9.8e-05	6	Alkanindiges
																													9.8e-05	6	Oceanibulbus
																													9.8e-05	6	Desulfovermiculus
																													9.8e-05	6	Caldalkalibacillus
																													9.8e-05	6	Candidatus Azobacteroides
																													9.8e-05	6	Thalassobium
																													9.8e-05	6	Candidatus Photodesmus
																													9.8e-05	6	Caldibacillus
																													9.8e-05	6	Ferriphaselus
																													8.1e-05	5	Methanohalophilus
																													8.1e-05	5	Vagococcus
																													8.1e-05	5	Dolosigranulum
																													8.1e-05	5	Thermocrispum
																													8.1e-05	5	Filifactor
																													8.1e-05	5	Mogibacterium
																													8.1e-05	5	Necropsobacter
																													6.5e-05	4	Hydrogenovibrio
																													6.5e-05	4	Desulfonatronovibrio
																													6.5e-05	4	Macrococcus
																													6.5e-05	4	Trabulsiella
																													6.5e-05	4	Nanoarchaeum
																													6.5e-05	4	Tepidiphilus
																													4.9e-05	3	Cryptobacterium
																													4.9e-05	3	Halomicrobium
																													4.9e-05	3	Histophilus
																													3.3e-05	2	Dichelobacter
																													3.3e-05	2	Raoultella
																													3.3e-05	2	Candidatus Hodgkinia
																													3.3e-05	2	Candidatus Walczuchella
																													1.6e-05	1	Methanothermus
																													1.6e-05	1	Candidatus Profftella
																													1.6e-05	1	Candidatus Ruthia
																													-------------------------------------------
																													0.219593	13511	Viruses
																													3.61156	222210	cannot be assigned to a genus
																													-------------------------------------------
																													86.4184	5317106	unclassified
