# Supplementary material for: A metagenomic study of DNA viruses from samples of local varieties of common bean in Kenya
Source: PeerJ. 2019 Mar 15;7:e6465. doi: 10.7717/peerj.6465 (PMC6422016; doi:10.7717/peerj.6465)
Supplement: Supplemental Information 3 — Pairwise comparison of the nucleotide sequence alignment of the Aphid lethal paralysis virus (ALPV). [file peerj-07-6465-s003.xlsx]

## Sheet: ALPV_sequences_Fig S3.csv
	Fig S3: Pairwise comparison of the nucleotide sequence alignment of the Aphid lethal paralysis virus (ALPV)
	KX884399.1_outgroup	AF536531.1_LabIsolates	JQ320375.1_China	JX480861.1_Israel	KJ817182.1_Kenya_aphids	KR021407.1_China	KX610809.1_Kenya_maize	KX830963.1_EastTimor	KX883690.1_China_Spider	KX883929.1_China_Odonata	LN907586.1_Kenya_Aphids	LN907587.1_Kenya_Aphid	LN907588.1_Kenya_Aphid	LN907589.1_Kenya_Aphid	MF458892.1_Kenya_Maize	MF458893.1_Kenya_Aphid	MF795134.1_China_Wasp	MF795135.1_China_Aphid	NC_004365.1_LabIsolates	SRF35_Kenya_CommonBean
KX884399.1_outgroup
AF536531.1_LabIsolates	81.9
JQ320375.1_China	81.3	93.7
JX480861.1_Israel	85.2	81.9	82.8
KJ817182.1_Kenya_aphids	78.5	75.9	75.3	76.5
KR021407.1_China	80.7	94.1	99	82.2	74.8
KX610809.1_Kenya_maize	82.2	80.9	79.9	83.8	85.2	79.5
KX830963.1_EastTimor	81.7	93.1	93.7	82.2	76.1	93.7	80.7
KX883690.1_China_Spider	81.3	94.3	95.5	81.7	75.3	96.1	80.5	94.5
KX883929.1_China_Odonata	80.5	93.9	98.8	81.9	74.6	99.8	79.3	93.5	95.9
LN907586.1_Kenya_Aphids	85.2	83.4	83.4	95.3	76.9	83.2	84.8	83.6	83.6	83
LN907587.1_Kenya_Aphid	85.2	83.4	83.4	95.3	76.9	83.2	84.8	83.6	83.6	83	100
LN907588.1_Kenya_Aphid	85.2	83.4	83.4	94.9	76.7	83.2	84.6	83.8	83.6	83	99.6	99.6
LN907589.1_Kenya_Aphid	85.2	83.4	83.4	94.9	76.7	83.2	84.6	83.8	83.6	83	99.6	99.6	100
MF458892.1_Kenya_Maize	81.5	94.9	95.7	81.7	75.5	96.3	80.7	94.9	98.6	96.1	83.6	83.6	83.6	83.6
MF458893.1_Kenya_Aphid	85.4	83.6	83.6	94.9	77.3	83.4	85.2	84	83.8	83.2	99.2	99.2	98.8	98.8	83.8
MF795134.1_China_Wasp	81.1	94.9	96.1	82.2	75.1	96.8	80.9	94.5	98.2	96.6	84	84	84	84	98	84.2
MF795135.1_China_Aphid	80.9	94.3	95.5	81.9	75.1	96.1	80.3	94.3	99.6	95.9	83.4	83.4	83.4	83.4	98.6	83.6	98.2
NC_004365.1_LabIsolates	81.9	100	93.7	81.9	75.9	94.1	80.9	93.1	94.3	93.9	83.4	83.4	83.4	83.4	94.9	83.6	94.9	94.3
SRF35_MK04481_Kenya_CommonBean	80.3	94.1	95.3	81.9	74.4	95.9	79.9	94.1	98.6	95.7	83.4	83.4	83.4	83.4	98.4	83.6	98	99	94.1
